# Supplementary material
Source: PubMed Central journal article supplement (PMC170928)
Supplement: pnas_1533499100_1.pdf [file pnas_1533499100_1.pdf]

**Table 2. Amino acid alignment used in the phylogenetic analyses**

The alignment was obtained by concatenating the independently obtained alignments of 61 proteins (*rpsT*, *rpsB*, *tsf*, *frr*, *infA*, *rpsA*, *rpmF*, *prfA*, *rplT*, *rpmI*, *infC*, *rplY*, *lepA*, *rplS*, *rpsP*, *rpsU*, *rpsO*, *infB*, *rpmA*, *rplU*, *rpsI*, *rplM*, *rplQ*, *rpsD*, *rpsK*, *rpsM*, *rpmJ*, *rplO*, *rpmD*, *rpsE*, *rplR*, *rplF*, *rpsH*, *rpsN*, *rplE*, *rplX*, *rplN*, *rpsQ*, *rpmC*, *rplP*, *rpsC*, *rplV*, *rpsS*, *rplB*, *rplW*, *rplD*, *rplC*, *rpsJ*, *rpsG*, *rpsL*, *rpmG*, *rpmB*, *rpmH*, *rpmE*, *rplK*, *rplJ*, *rplL*, *esp*, *rpsF*, *rpsR*, and *rplI*) from 19 selected genomes after extraction of their clearly conserved portion by using GBLOCKS (1).

|        |                                                                                       |
|--------|---------------------------------------------------------------------------------------|
| b0170  | TYYSNDFRAGLKIIMLDGEPYAVEASEFVKPGKQAFARVKLRLLLTGTRVEKTFKSTDSAEGADVDMNLTLYLNDGEFVH      |
| Bbp214 | LCHSNQLKIGLKI IYNNPCIVVSNEFIKPKGQAFVVRVLRLLNKKLIDKTCYSDCFKIANVIEITATYMFDTKKVVT        |
| Bf131  | LYNINELKVLKVIQNKPEYVI IKNECIKPKGQSFNRVRFQIKSGKILEKTLKPGDLVESANIVETELIYVYRDRDLWF       |
| bu232  | IYHSNNFRSRGRIIFENEPCLIESSEFVKPGKQSFVVRVLRLLTKQLIEKTFKSTDSLEIADIIEYTLSYLNDGRFWY        |
| BUsq22 | VYHSNNFRSRGRIIFEKEPCLIESSEFVKPGKQSFVVRVLRLLTKQLIEKTFKSTDSLEIADVSEYTLSYLNDGHFWY        |
| HI0914 | TYTTSDFKPKLKFMDGEPVIVENEFVKPGKQAFTRTRIRKLSIGKVLVDVNFKSGTSVEAADVMDLNLTYSYKDDAFWY       |
| PA3655 | MKTAQEFQVAVINGAPVVIQKAENFKSGRAAVVKMKLKNLLTGAGTETVFKADDKLEPIILDRKEVTYSYFADPLVY         |
| PM1985 | TYTTSDFKPKLKFMDGEPVIVENEFVKPGKQAFTRTRIRKLSIGKVLVDVNFKSGTSVEAADVMDLNLTYSYKDDAFWY       |
| RScl40 | LKIAQELRAGNVFMIGNDPMVVLKTEYSRSGRAAVVKMKYKNLLTGAPSESVFKADDKMDQIILDKKECTYSYFADPMYV      |
| STM021 | TYYSNDFRSGLKIIMLDGEPYAVESSEFVKPGKQAFARVKLRLLLTGTRVEKTFKSTDSAEGADVDMNLTLYLNDGEFVH      |
| STY024 | TYYSNDFRSGLKIIMLDGEPYAVESSEFVKPGKQAFARVKLRLLLTGTRVEKTFKSTDSAEGADVDMNLTLYLNDGEFVH      |
| vc2259 | TVSTNEFKGGLKIMLDNEPCVILENEVYKPGKQAFNRVIRKLLTGKVLKTFKSGDTAEVADVDDIDLTYLNDGEFYH         |
| wbr31  | YYSANQSKSLKILKNEPCLILENQFVKPGKQPFNRIRIKKLSIGKIFTKIFKSNEKLIYADVLDVKVKSLEYKDKKYWN       |
| XAC142 | TVGMNDVKNMGKILVNNPEAVITETEYVVKPGKQAFTRMKYRFIKSGRVVEMTMKATDDVEVADVDDTDMRYLYSDGEYWH     |
| XCC137 | TVGMNDVKNMGKILVNNPEAVITETEYVVKPGKQAFTRMKYRFIKSGRVVEMTMKATDDVEVADVDDTDMRYLYSDGEYWH     |
| XF2579 | VMKASEMKKGSIVEYNGTYQIRDIRSSPQGRNVRFRFVMSVPPGGSKLEASFDADAEMTLAVELLRREASFSYKDGAEFV      |
| y3135  | SYYSNDFRSGLKIIMLDGEPYAVESSEFVKPGKQAFARVKLRLLLTGTRVEKTFKSTDSLEAGADVDMNLTLYLNDGEFVH     |
| YP0104 | SYYSNDFRSGLKIIMLDGEPYAVESSEFVKPGKQAFARVKLRLLLTGTRVEKTFKSTDSLEAGADVDMNLTLYLNDGEFVH     |
| Z0181  | TYYSNDFRAGLKIIMLDGEPYAVEASEFVKPGKQAFARVKLRLLLTGTRVEKTFKSTDSAEGADVDMNLTLYLNDGEFVH      |
| b0170  | FMNNEFQLSADAKAIGDNAKWLDDQACIVTLWNGQPINFVELEIVDTPGLKGDTPATLSTGAVVKVPLFVQIGEVIKV        |
| Bbp214 | FMDKFEQIFVEKNI IKNVLPWLLQHYI IISLWNDQPINFIELIVVNTIPNARSGAKLALLNTGVTIKVPIFIQIGQIKV     |
| Bf131  | FMNRFDQISVHFIDILGKSVKWMVEQLYVVVFWDDNPIEFIKLKI IKTNLI TKNISKLAVVSTGAVVKVPPFFIQSGELIKV  |
| bu232  | FINNFEELSVDKIIIGVHKKWLLLEQDCIVTLWNNQPINFVNLKVIHVQATLKGDTKLATLSTGAVVPLFVQVGSILKV       |
| BUsq22 | FINNFEELSVDKIIIGVHKKWLLLEQDCIVTFWNNQAIIFVELKVIDTEIALKSDTKLATLSTGAILKVPFLFIQIGSLIKV    |
| HI0914 | FMHPFEQYSADAKAVGDAEKWLDDQACIVTLWNGAPINFVELEIVDTPGLKGDTPATLSTGAVVKVPLFVQIGEVIRV        |
| PA3655 | FMDSNQYIEKDDLEGVLTPIEDGMCFAVYNDKVIITTIIVRQIAYTEPAVRGDTKTARLNNGAELQVSAFCEIGDSIEI       |
| PM1985 | FMHPFEQYSADAKAIGDAEKWLDDQACIVTLWNGAPINFVELEIIDTDPGLKGDTPATLSTGAVVKVPLFVQIGEVIKV       |
| RScl40 | FMDTYNQYVEEADSMGDAIHYLEDMGAEVTFYNEKAITTLVREIEYTEPAVKGDTKMAKIKGGFEIQVPLFCSTGDKIEI      |
| STM021 | FMNNEFQLSADAKAIGDNAKWLDDQACIVTLWNGQPINFVELEIVDTPGLKGDTPATLSTGAVVKVPLFVQIGEVIKV        |
| STY024 | FMNNEFQLSADAKAIGDNAKWLDDQACIVTLWNGQPINFVELEIVDTPGLKGDTPATLSTGAVVKVPLFVQIGEVIKV        |
| vc2259 | FMNNEFQLAADAKAVGENAKWLVNENCMVTLWNGNPINFVELEVTEVTPDGPVKGDTPATLSTGAVVVRPLFVQIGEVIKV     |
| wbr31  | FIKKFEQFKISKKNLGEKYYKIIIEQLCYVQVLIIDASPVQHVLEVVDTPELKGDTKPAKLIITGTGAI IKAPIFIRSEI VRV |
| XAC142 | FMDPFEQVQTDKAGMGADKWLKGEECIVTLWNGTPINFVELKITEVTPDGPVGRDTPATLETGAVVVRPLFVNQDEI IKV     |
| XCC137 | FMDPFEQVQADKAGMGGAEKWLKGEECIVTLWNGAPINFVELKITEVTPDGPVGRDTPATLETGAVVVRPLFVNQDEVIKV     |
| XF2579 | FLDEYTYLTLAEAAIGDNAGYIIEGLCYVQVLIIDASPVQHVLEVVDTPELKGDTKPAKLIITGTGAI IKAPIFIRSEI VRV  |
| y3135  | FMNNEFQLQADAKAVGDNKWLIDQACIVTLWNGQPINFVELEIVDTPGLKGDTPATLSTGAVVKVPLFVQVGEI IKV        |
| YP0104 | FMNNEFQLQADAKAVGDNKWLIDQACIVTLWNGQPINFVELEIVDTPGLKGDTPATLSTGAVVKVPLFVQVGEI IKV        |
| Z0181  | FMNNEFQLSADAKAIGDNAKWLDDQACIVTLWNGQPINFVELEIVDTPGLKGDTPATLSTGAVVKVPLFVQIGEVIKV        |
| b0170  | DTRSGEYVSRISDIRKDAEVRMDKVEAFKQIISKIRTGRASPSLLDGI VVEYGTPTPLRQLASVTVEDSRTLKINVFD       |
| Bbp214 | DTRTSEYISKMERIKNFTSSKMDHCVMHFVNQLNLTLRSSRASPSILDTILIDYLGQKIQLKKSNI IVENVNTLRITLFD     |
| Bf131  | NTHSGSYISRIDDFQKDVITNMQKCIDNFKININKIHVGRISPDILSFIKIEYGGVITPLCQLTNTVVEQPRTLIITVFD      |
| bu232  | DTRSGEYVSRINQIDIKTRERMEACIQTFHNNITNKTGRASPTLLHNIYIEYFGSKTPLRQVSNII VEDSHTLKINVFD      |
| BUsq22 | DTRSGEYVSRINDIYIKSNEKMKVCINNFQIQVNNVRTGRASPELNSIYVEYFGSKVPLRQISNVVYHTLKINIFD          |
| HI0914 | DTRSGEYVSRINQIKKDAQDRMEKSLKALGHISKIRTGRAQPSLLDAIQVEYGGATPLRQLANVAEDARTLAVTVFD         |
| PA3655 | DTRTGEYKSRINEIKKEAQERMKGTLEALGHAFAKIRTGRAHPSIILDSVMVSYGGADTPLRQVANVTVEDSRTLALAVFD     |
| PM1985 | DTRSGEYVSRINEIKKDTQLRMEKSLKALGHISKIRTGRAHPSIILDSVMVSYGGADTPLRQVANVTVEDSRTLALAVFD      |
| RScl40 | DTRTHEYRSRVADIKKSAEQKMQKSIDAFKADLAKVRTGRAHTGLLDHVQVDYGGMVPISQVANLGLADARTISVQPWE       |
| STM021 | DTRSGEYVSRISDIRKDAEVRMEKVEAFKQIISKVRTGRASPSLLDGI VVEYGTPTPLRQLASVTVEDSRTLKINVFD       |
| STY024 | DTRSGEYVSRISDIRKDAEVRMEKVEAFKQIISKVRTGRASPSLLDGI VVEYGTPTPLRQLANVAEDARTLAVTVFD        |
| vc2259 | DTRSAEYVGRINEIKKDAQERMKSVKALNGLSKIRTGRAHPSLLTGISVDYGGATPLNQVANVAEDARTLAVTVFD          |
| wbr31  | DTNLGEYVSRINEIYENSNSRMKKSIDFFKKNISKIRTNRVSPSLIENIYINCYGTSVPLSKLSNILSEKSNILKINVFD      |
| XAC142 | DTRSGEYSARLTQIKQDAQTRMTKSIDALRHSLTTRTGRASPELLDGIKVKAYGADTPLNQVASISVSEGRSLVLSLFD       |
| XCC137 | DTRSGEYSARLTQIKQDAQTRMTKSIDALRHSLTTRTGRASPELLDGIKVKAYGADTPLNQVASISVSEGRSLVLSLFD       |
| XF2579 | NTTTGAFGGRLNQIKQDAQDRMTKSIDALRNSLASVRTGRASPSLLDGIKVKAYGADTPLNQVASISVSEGRSLVITVFD      |
| y3135  | DTRSGEYVSRINEIRKDAEVRMEKCLEAFQNHISKIRTGRASPSIILDGIQVEYGGATPLRQLANVAEDARTLAVTVFD       |

YPO104 DTRSGEYVSRINEIRKDAEVRMEKCLEAFQNHISKIRTGRASPSILDGIQVEYYGTATPLRQLANIVVEDSRTLALTVPFD  
Z0181 DTRSGEYVSRISDIRKDAEVRMDKCVFAFKTQISKIRTGRASPSLLDGI VVEYYGTPTPLRQLASVTVEDSRTLKINVPD

b0170 RSMSPAVEKAIMASDLGLNPNSSAGSDIRVPLPPLTEERRKDLTKIVRGEAEQARVAVRNVRRDANDKVKALLKDKKIESED  
BbP214 PKIKNNVEKAISSKLDLIPFINNYFQIKIPVLTEERRLQIKLAKKMAENSRICIRNIRLSNEKIKLFLKDKIISD  
Bf131 SSMIKFIEKAILESNLGCTPVSTGNTIRVTFPTLTERRRYSLIKVMRSESEKSKVLIRNIRRVSNDKLKTFLRNKEINKD  
bu232 DSITSLIRKSIILNSNLDLNPVLQGGKDIIPPLRTEERRKQIKVIRGDAESSRIQIRNIRRDANDKVKRLLKDKIISED  
BUsg22 DSSTSLIKKAILNSNLDLNPILYKDIIVPPLTEERRTHLKIIVRNNANARIYIRNIRRDANDKIKNYLKSIISED  
HI0914 RSLISAVEKAILTSDGLNPNSSAGTTIRVPLPPLTEERRDLIKIVKGEQEGQKQVAVRNVRRDANDKIKALLKDKKIESEN  
PA3655 KSMIQAWEKAIMTSDGLNPNPATAGTTIRVPMALTEETRKGYTKQARAEAEQARVSVRNIIRDALAQKDLQKKEKIESED  
PM1985 RSLISAVEKAILTSDGLNPNSSAGTTIRVPLPPLTEERRDLIKIVKGEAEQGIQVAVRNVRRDANDKIKALLKDKKIESED  
RSc140 KKMVSAVERAIRDADLGLNPNPATMGEVIRVPMPLTEERRKELTKVVKSEGEDAKVAVRNVRRDANEQFKKLVKDKAISED  
STM021 RSMGPAVEKAIMASDLGLNPNSSAGTTIRVPLPPLTEERRKDLTKIVRGEAEQARVAVRNVRRDANDKVKALLKDKAISED  
STY024 RSMGPAVEKAIMASDLGLNPNSSAGTTIRVPLPPLTEERRKDLTKIVRGEAEQARVAVRNVRRDANDKVKALLKDKAISED  
vc2259 RELTQKVEKAILMSDLGLNPNSSAGTTIRVPLPPLTEERRDLVIVRGEAEQGRVAVRNVRRDANDKVKALLKDKKIESED  
wbr31 NNIKKIEQALSSDLGVNPQIQENYIRIEFPKLTERRFLIKL INKEAEQNIISIRNIRRDANEKIKKLLKAKTIGKD  
XAC142 KGMIKDVEKAIYASDLGLTPTVVGTVIRLNLPLPTEERRKDLTKIVRGEAEQARVAVRNVRRDANDKVKALLKDKAISED  
XCC137 KGMIKDVEKAIYASDLGLTPTVVGTVIRLNLPLPTEERRKELSKSVHGEGEDAKVAIRNIRRDANQQVKDLKDKQVTE  
XF2579 KNMSKDVEKAIYASDLGLTPTVVGTVIRLNLPLPTEERRKELTKVHSEGEDTKVAIRNIRRDANQQIKDMLKSKEITED  
y3135 YP0104 RSLSAAVEKAIMTSDGLNPNSSAGTVIRVPLPALTEERRKDLIKVRAEAEQGRVSVRNVRRDANDKVKALLKDKKIESED  
Z0181 RSMSPAVEKAIMASDLGLNPNSSAGSDIRVPLPPLTEERRKDLTKIVRGEAEQARVAVRNVRRDANDKVKALLKDKKIESED

b0170 DRRSQDDVQKLTDAAIKKIEAALADKAEELMMAKEDNIEMQGTVLETLPTMFRVELENGHVVTAHISGKMRKNYIRIL  
BbP214 KERRIQHEVQDITNSYMEKINVLISKKEKDLMTKEDCIEMQGVVDTLPTMFRVQLDNKHIVTAHISGKMRKNYIRIL  
Bf131 NEHYFQNEIQNLTDIWKIKIILITKEKELEMLMKEEDNIEMQGVVDTLPTMFRVQLENGHKTVAHISGKMRKNYIRIL  
bu232 NEHTSQSKIQIMTNEYIKKIDCILEKKEKELMMSKEENIEMQGVVDTLPTMFRVELENKHIVTAHISGKMRKNYIRIL  
BUsg22 NEHAAQNKIQMTTDDYIKKIDKILSEKKEKDLMTKEDNIEMQGVVDTLPTMFRVELENKHIVTAHISGKMRKNYIRIL  
HI0914 EQHKAEEIQQITDIYIKKIDVDEVLADKEKELMMAKEDCIEMQGTILETLPTMFRVELENGHVVTAHISGKMRKNYIRIL  
PA3655 EERRAGDDVQKLTDFIGEIEKALEAKEADLMSKEDSFEMEGTVVDTLPTMFRVELENGHVVTAHISGKMRKNYIRIL  
PM1985 EERKAQDEIQQITDIYIKKIDVDEVLADKEKELMMAKEDCIEMQGTILETLPTMFRVELENGHVVTAHISGKMRKNYIRIL  
RSc140 DERRGQDEVQKLTDRFVAEVDKLVAEKDEIMLAKLEEIEFEGSVSEALPDNRVQLENGVEVWAYASGKMQKHRIRIL  
STM021 DRRSQEEVQKMTDAAIKKVDAAALADKAEELMMAKEDNIEMQGTVLETLPTMFRVELENGHVVTAHISGKMRKNYIRIL  
STY024 DRRSQEEVQKMTDAAIKKVDAAALADKAEELMMAKEDNIEMQGTVLETLPTMFRVELENGHVVTAHISGKMRKNYIRIL  
vc2259 DERRAQEEIQQLTDAAVKIDDDVLAKEELMMAKEDVIEEMQGTVLDLPTMFRVELENGHVVTAHISGKMRKNYIRIL  
wbr31 EDKFKQVEIQNLNRSIEDTKKILKLEKEIKMTKEENIEMQGVLDLPTMFRVELENKHVLAHISGKMRKNYIRIL  
XAC142 EARSAEDDIQQLTDKAIAKDVDEVVKGEQELMMSKDDSIIEFEGSVSETLPTNTFRVLENGHEIIAHISGRMRKNYIRIL  
XCC137 EARGAEDDIQQLTDKAIAKDVDEVVKGEQELMMSKDDSIIEFEGSVSETLPTNTFRVLENGHEIIAHISGRMRKNYIRIL  
XF2579 EVRQGEEDIQQLTDKAIAKDVDEVVKGEQELMMSKDDCIIEFEGTVSETLPTNTFRVLENGHEVTAHISGRMRKNYIRIL  
y3135 EDRRSQDDVQKLTDAYIKKVDAAALADKAEELMMAKEDNIEMQGTVLDLPTMFRVELENGHVVTAHISGKMRKNYIRIL  
YPO104 EDRRSQDDVQKLTDAYIKKVDAAALADKAEELMMAKEDNIEMQGTVLDLPTMFRVELENGHVVTAHISGKMRKNYIRIL  
Z0181 DRRSQDDVQKLTDAAIKKIEAALADKAEELMMAKEDNIEMQGTVLETLPTMFRVELENGHVVTAHISGKMRKNYIRIL

b0170 TGDKVTVELTPYDLSKGRIVFRAQEKLTQKTRSTLKSQVIEVRKRTFVEAQQAQAEKDNAQAEKARRQQGFQKPAQAVNR  
BbP214 TGDKVTLELTPYDLSKGRIFRQLEVLMLKKIRSTVKCISIEIRKKNRYSVSHSKKQKEKEDKNINFKQVFKKPLRAINR  
Bf131 TGDKVTVELTPYDLSKGRIFRQSEKLFQKTHSTLKKVQVEVRKRVYMNELSSQKETNELVKLDHVSFNKPMQKTVR  
bu232 TGDKVTVELTPYDLSKGRIFRQLETLVLQKTRSTLKSQVIEVRKRVYMNELSSQKETNELVKLDHVSFNKPMQKTVR  
BUsg22 TGDKVTIELTPYDLSKGRIFRITETFLQKTRSTLKSQVIEIRKKNRMYLAKESNKLTKNEKNKINFPQVFKKPVSVINR  
HI0914 TGDKVTVEMTPYDLSKGRIFRDAPKLSIQRTKTTVKEVQVEVRKRTVKAEEAEVDSVSESEKARQQAFKPAQVVKVS  
PA3655 TGDKVRVELTPYDLSKGRITYRDESEKILTLQKTRSTLKSQVIEVRKRVYMNELSSQKETNELVKLDHVSFNKPMQKTVR  
PM1985 TGDKVTIEMTPYDLNKGRIIFRAAPKLSLQRTKTTVKEVQVEVRKRTVPADEAEVSAAVDVEKARQQAFKPAQAVNR  
RSc140 AGDRVKLEMPYDLTKGRINYRESKILTLTRETSEIRTQVQVEVRKRVYMNELSSQKETNELVKLDHVSFNKPMQKTVR  
STM021 TGDKVTVELTPYDLSKGRIVFRAQEKLTQKTRSTLKSQVIEVRKRTFVEAQQAQAEKDTAQAEKARRQQGFQKPAQAVNR  
STY024 TGDKVTVELTPYDLSKGRIVFRAQEKLTQKTRSTLKSQVIEVRKRTFVEAQQAQAEKDTAQAEKARRQQGFQKPAQAVNR  
vc2259 TGDKVTVEMTPYDLSKGRIVFREDERLTLQKTRSTLKNVQVEVRKRTVYAAEEEEKAEKLLQARQHGFDKTAVVAKA  
wbr31 DVVINGAITVCDLANKMAIKSSEVINKMMNMGIGTINHVLDQDTAQLIAEEMGHKVIIVHRENALEELIMKDVSAIRAPV  
XAC142 TGDRVKVEMTPYDLTKGRITYRSTEKITLNRKLQEVTTVNVVEVRKRTVYVNLDEEQAAAAAASPAAPHGFERPTAPVVR  
XCC137 TGDRVKVEMTPYDLTKGRITYRSTEKITLNRKLQEVTTVNVVEVRKRTVYVNLDEEQAAAAAASPAAPHGFERPTAPVVR  
XF2579 TGDRVKIEMTAYDLTKGRITYRSTEKITLNRKLQEVTTVNVVEVRKRTVYVNLDEEQAAAAAASPAAPHGFERPTAPVVR  
y3135 TGDKVTVELTPYDLSKGRIVFRQEKLTQKTRSTLKSQVIEVRKRTVYVIAEEAEKQPAQTDKTRRQVFNKPVAVNR  
YPO104 TGDKVTVELTPYDLSKGRIVFRQEKLTQKTRSTLKSQVIEVRKRTVYVIAEEAEKQPAQTDKTRRQVFNKPVAVNR  
Z0181 TGDKVTVELTPYDLSKGRIVFRAQEKLTQKTRSTLKSQVIEVRKRTFVEAQQAQAEKDNAQAEKARRQQGFQKPAQAVNR

b0170 DVVIGETITVDELANKMAVKSQVIKAMMKGAMATINQVLDQETAQLVAEEMGHKVIILRENELEEAVMASAAAEPRAPV  
BbP214 NIILSSAISFNLANKMAVKSSEI IKMMARLGYTVTINQI IDQDIAQLVAEEMGHKVTICYENKLEDKIMRGLIKKTRPPI  
Bf131 DVVIGETISVAELSNKMSIKSSSMIKMMMLGLMVTINQNLQETAQLVVEEMGHNAILRENALEELIMHMGYKNRAPI  
bu232 DVIISNTITVSDLANKMAIKSSEVINKMMNMGIGTINHVLDQDTAQLIAEEMGHKVIIVHRENALEELIMKDVSAIRAPV  
BUsg22 DVVINGAITVCDLANKMAIKSSEVINKMMNMGIGTINHVLDQDTAQLIAEEMGHKVIILRENELEELIMKDVSAIRAPV  
HI0914 DVVIGETITVAELANKMAVKATEI IKMMKMGEMVTINQVLDQETAQLVAEELGHKVIILRENELEEAVLGAEKVTRAPV  
PA3655 EVNIGETITVAELAAQMSVKGAEVVKFMFGMSPVTINQVLDQETAQLVAEELGHKVKLVSENALEEQVLAEGEAVTRAPV  
PM1985 DVVIGETITVAELANKMAVKATEV IKTMMKMGAMATINQVLDQETAQLVAEEMGHKVIIRKNELEESVMAELVTRAPV  
RSc140 EVHVPEITISVAELAHKMAVKAEEV I KMMKLGQVMTINQVLDQETAQMI VVEEMGHQVAALDDPEALLVEVEAEARPPV  
STM021 DVVIGETITVDELANKMAVKSQVIKAMMKGAMATINQVLDQETAQLVAEEMGHKVIILRENELEEAVMASAAAEPRAPV

STY024 DVVIGETITVDELANKMAVKSQVIKAMMKGAMATINQVLDQETAQLVAEEMGHKVIILRENELEEAVMASAAAEPRAPV  
vc2259 DVVIGETITVSELAQKMSVKATEV I KMMKMGAMATINQVLDQETAQLVAEEMGHKVIILRENELEEAALSFEEVSRAPV  
wbr31 EITIGETISVFEALSANKMAVKSSEVINKMMNMGIGTINHVLDQDTAQLIAEEMGHKVIILRENELEELIMKDVSAIRAPV  
XAC142 EVAIGETITVADLAQKLAQKGGDVVKALFKMGVMTITQSIDHDTAALVTEELGHKAVRADNADFEDALLAGEATSRPPV  
XCC137 EVAIGETITVADLAQKLAQKGGDVVKALFKMGVMTITQSIDHDTAALVTEELGHKAVRADNADFEDALLAGEATSRPPV  
XF2579 EVAVGDITVADLAQKLAQKGGDVVKALFKMGVMTITQSIDHDTAALVTEELGHKAVRADNADFEDALLAGEATSRPPV  
y3135 DVVIGETITVDELANKMAVKSQVIKAMMKGAMATINQVLDQETAQLVAEEMGHKVIILRENELEEAALMSAAAEHRAPV  
YPO104 DVVIGETITVDELANKMAVKSQVIKAMMKGAMATINQVLDQETAQLVAEEMGHKVIILRENELEEAALMSAAAEHRAPV  
Z0181 DVVIGETITVDELANKMAVKSQVIKAMMKGAMATINQVLDQETAQLVAEEMGHKVIILRENELEEAALMSAAAEHRAPV

b0170 VTIMGHVDHGKTSLLDYIRSTKVASGEAGGITQHIGAYHVIITFLDTPGHAAFTSMRARGAQATDIIVVLVVAADDGVMP  
BbP214 ITIMGHVDHGKTSLLDKIRLTVRVADESGRITQHIGAYHVIITFLDTPGHAAFTSMRARGAQATDIIVVLVVAADDGVMP  
Bf131 VTIMGHVDHGKTSLLDYIRSTNVASSESGGITQHIGAYCVQMVFTIDTPGHAAFTDMRARGIQLTDIIVVLVVAADDGVMP

bu232 VTIMGHVDHGKTSLLDYIRSTKTAFFEYAGGITQNI GAYHVKSITFLDTPGHSAAFTAMRSRGVQITDIVILVVAADDGVMP  
BUsg22 VTIMGHVDHGKTSLLDYIRSTKVASSEAGGITQNI GAYHVSITFLDTPGHSAAFTGMRSGVKITDIVLVAADDGVMP  
HI0914 VTIMGHVDHGKTSLLDYIRKAKVAAGEAGGITQHI GAYHVEMITFLDTPGHAAFTSMRARGAKATDIVLVAADDGVMP  
PA3655 VTMGHVDHGKTSLLDYIRKAKVAAGEAGGITQHI GAYHVEMITFLDTPGHAAFTSMRARGAQATDIVLVAADDGVMP  
PM1985 VTIMGHVDHGKTSLLDYIRKAKVAAGEAGGITQHI GAYHVEMITFLDTPGHAAFTSMRARGAKATDIVLVAADDGVMP  
RSc140 VTMGHVDHGKTSLLDYIRKAKVAAGEAGGITQHI GAYHVEMITFLDTPGHAAFTSMRARGAKATDIVLVAADDGVMP  
STM021 VTIMGHVDHGKTSLLDYIRSTKVASGEAGGITQHI GAYHVEMITFLDTPGHAAFTSMRARGAQATDIVLVAADDGVMP  
STY024 VTIMGHVDHGKTSLLDYIRSTKVASGEAGGITQHI GAYHVEMITFLDTPGHAAFTSMRARGAQATDIVLVAADDGVMP  
vc2259 VTIMGHVDHGKTSLLDYIRRTHVASGEAGGITQHI GAYHVEMITFLDTPGHAAFTSMRARGAQATDIVLVAADDGVMP  
wbr31 VTIMGHVDHGKTSLLDYIRTTKVALKEKGGITQCI GAYYVKLITFDTPGHAAFTSMRIRGSKITDIVLVAADDGIMP  
XAC142 VTIMGHVDHGKTSLLDYIRRTKIASGEAGGITQHI GAYHVEMITFLDTPGHAAFTSMRARGAKITDIVLVAADDGVMP  
XCC137 VTIMGHVDHGKTSLLDYIRRTKIASGEAGGITQHI GAYHVEMITFLDTPGHAAFTSMRARGAKITDIVLVAADDGVMP  
XF2579 VTIMGHVDHGKTSLLDYIRRTKIASGEAGGITQHI GAYHVEMITFLDTPGHAAFTSMRARGAKITDIVLVAADDGVMP  
y3135 VTIMGHVDHGKTSLLDYIRSTKVASGEAGGITQHI GAYHVEMITFLDTPGHAAFTSMRARGAQATDIVLVAADDGVMP  
YPO104 VTIMGHVDHGKTSLLDYIRSTKVASGEAGGITQHI GAYHVEMITFLDTPGHAAFTSMRARGAQATDIVLVAADDGVMP  
Z0181 VTIMGHVDHGKTSLLDYIRSTKVASGEAGGITQHI GAYHVEMITFLDTPGHAAFTSMRARGAQATDIVLVAADDGVMP

b0170 QTIEAIQHAKAAQVPVVAVNKKIDKPEADPDRVKNELSQYGLPEEWGGESQFVHVSAAKAGTGIDELLDAILLQAEVLEL  
BBp214 QTIEAIQHAQAASVPIIAINKIDKLTITNEKIKNELTKYNILPEEWGGDNIFVNI SAKSGEGIESLLNAILLTQSEMEL  
Bf131 QTVEAIQIRDGNLPIIAINKIDKSVTNVERIKNELNSYGFIPPEEWGGHTQFVNVSAVSGEGVNDLDSILLQSEILEL  
bu232 QTIEAIQHAKAANVPVIVAINKIDKTDSDIDKVRNDLMKYNILSEEWGGENIFVSVSAKTGKINKLLNVILLQAEMLLEL  
BUsg22 QTIEAIQHAKAANVPVIVAINKIDKVDNSNDIQKNDLTKYVILSEEWGGENIFVLSAKTGGKINDLNAILLQSEILEL  
HI0914 QTIEAIQHAKAAGAPLVAVNKKIDKPEANLDRVEQELLQHDVISEKFGGDTQFVVPVSAKKTGVDLDAILLQSEVLEL  
PA3655 QTQEAHQHAKAAGVPIVAVNKKIDKPEANPNIDKNGLAALDVIPEEWGGDAPFVVPVSAKLTGVDLLEAVLLQAEVLEL  
PM1985 QTIEAIQHAKAAGVPIVAVNKKIDKPEANPERVETELLQHEVVAEKFGGDTQFVVPVSAKKTGVDLLEAVLLQAEVLEL  
RSc140 QTKEAIAHAKAAGVPIVAVNKKIDKPEANPDRVKNELVSEVSEPEYGGDSFPVVPVSAKKTGQIENLLENVLLQAEVLEL  
STM021 QTIEAIQHAKAAGVPIVAVNKKIDKPEADPDRVKNELSQYGLPEEWGGESQFVHVSAAKAGTGIDELLDAILLQAEVLEL  
STY024 QTIEAIQHAKAAGVPIVAVNKKIDKPEADPDRVKNELSQYGLPEEWGGESQFVHVSAAKAGTGIDELLDAILLQAEVLEL  
vc2259 QTVEAIQHAKAAGVPLIVAVNKKIDKTDANPDRVKNELSQYGLPEEWGGDNMFVHISAKQGTNIDGLEAILLQAEVLEL  
wbr31 QTVEAINHAKIAKVPVPIIAINKIDKITSNPEKVKKELIKHGIFLEEGGDTQCLLISAKSGLGIDFLDAILLQAEILEL  
XAC142 QTKEAVAHAKAAGVPLIVAVNKKIDKTAGDPLRVKNELLAENVAEEFGGDTQFIEVSAKLTGVDLTDLDAISLQAEVLEL  
XCC137 QTKEAVAHAKAAGVPLIVAVNKKIDKTAGDPLRVKNELLAENVAEEFGGDTQFIEVSAKLTGVDLTDLDAISLQAEVLEL  
XF2579 QTKEAVQHARAAGVPLIVAVSKIDKSTADPQRVKNELLTESVVAEEFGGDTQFVVELSAKTGVDLDAISIQAEVLEL  
y3135 QTIEAIQHAKAANVPVVAVNKKIDKPEADPDRVKNELSQYGLQPEEWGGESQFINVSAKAGTGIDELLDAILLQAEVLEL  
YPO104 QTIEAIQHAKAANVPVVAVNKKIDKPEADPDRVKNELSQYGLQPEEWGGESQFINVSAKAGTGIDELLDAILLQAEVLEL  
Z0181 QTIEAIQHAKAAQVPVVAVNKKIDKPEADPDRVKNELSQYGLPEEWGGESQFVHVSAAKAGTGIDELLDAILLQAEVLEL

b0170 KAVRKGMSAGAVIESFLDKGRGPVATVLRVREGTLHKGDIVLCGFYGRVVRAMRNELGQEVLEAGPSIPVEILGLSGVPAA  
BBp214 KSISNGMASGLVIESYLDKGRGPTAII LIKEGKLNKGDIVLCGFYGRVVRAMRDSLGFVDTKAGPSIPVEILGLSGVPIA  
Bf131 KSMHGLAKAVVIESSLDRSRGPVATVLRVREGTLHKGDIVLCGFYGRVVRAMRDSLGFVDTKAGPSIPVEILGLSGVPIA  
bu232 KAVTTGMAEGIVVESFLDKGRGPIATVLRVQKLNKGDIVLCGFYGRVVRAMRDSLGFVDTKAGPSIPVEILGLSGVPIA  
BUsg22 KAISTGMAEGVIVVESFLDKGRGPIATVLRVQKLNKGDIVLCGFYGRVVRAMRDSLGFVDTKAGPSIPVEILGLSGVPIA  
HI0914 TAVKDGMSAGVIVVESFLDKGRGPIATVLRVQKLNKGDIVLCGFYGRVVRAMRDSLGFVDTKAGPSIPVEILGLSGVPIA  
PA3655 KATPSAPGRGVVVESFLDKGRGPIATVLRVQKLNKGDIVLCGFYGRVVRAMRDSLGFVDTKAGPSIPVEILGLSGVPIA  
PM1985 TAVKDGMSAGVIVVESFLDKGRGPIATVLRVQKLNKGDIVLCGFYGRVVRAMRDSLGFVDTKAGPSIPVEILGLSGVPIA  
RSc140 KAPINAAAKGLVVEAQLDKGKGPVATVLRVQKLNKGDIVLCGFYGRVVRAMRDSLGFVDTKAGPSIPVEILGLSGVPIA  
STM021 KAVRKGMSAGAVIESFLDKGRGPIATVLRVREGTLHKGDIVLCGFYGRVVRAMRNELGQEVLEAGPSIPVEILGLSGVPIA  
STY024 KAVRKGMSAGAVIESFLDKGRGPIATVLRVREGTLHKGDIVLCGFYGRVVRAMRNELGQEVLEAGPSIPVEILGLSGVPIA  
vc2259 KAVKQMSAGVIVVESFLDKGRGPIATVLRVQKLNKGDIVLCGFYGRVVRAMRDSLGFVDTKAGPSIPVEILGLSGVPIA  
wbr31 KAMHKMASGTVIESRLEKKGKPVSTIILIQEGRHLQGDVLLCGCEYGRVVRAMRDSLGFVDTKAGPSIPVEILGLSGVPIA  
XAC142 KAVAEGRASGTVIESRLEKKGKPVSTIILIQEGRHLQGDVLLCGCEYGRVVRAMRDSLGFVDTKAGPSIPVEILGLSGVPIA  
XCC137 KAVADGRASGTVIESRLEKKGKPVSTIILIQEGRHLQGDVLLCGCEYGRVVRAMRDSLGFVDTKAGPSIPVEILGLSGVPIA  
XF2579 KAVIEGRATGTVIESRLEKKGKPVSTIILIQEGRHLQGDVLLCGCEYGRVVRAMRDSLGFVDTKAGPSIPVEILGLSGVPIA  
y3135 KAVRTGMANGVIVVESFLDKGRGPIATVLRVQKLNKGDIVLCGFYGRVVRAMRDELGRDITSAGPSIPVEILGLSSVPAA  
YPO104 KAVRTGMANGVIVVESFLDKGRGPIATVLRVQKLNKGDIVLCGFYGRVVRAMRDELGRDITSAGPSIPVEILGLSSVPAA  
Z0181 KAVRKGMSAGAVIESFLDKGRGPIATVLRVREGTLHKGDIVLCGFYGRVVRAMRNELGQEVLEAGPSIPVEILGLSGVPAA

b0170 GDEVTVVRDEKKAREVALYRQKGFREVKLARQKSKLENMFANMTEGVHEVNIIVLKADVQGSVEAIDSLSLLKSTDEVKV  
BBp214 GDKIVVVRDEKQAREVATYRQKFKFKQKMSQRQLKSLDIFEDVKNRSNPSLNIIVIKSDVQGSLEAISYSLLLKSNDEIKI  
Bf131 GEWLVVVNNKAREVALYRQKFKFKKREIKLARKSEKTIIEFNFSMDIIEIKELNFIKSDTQGSMEVICESLKKLSTNKMMVM  
bu232 GDVVTVVRDEKKAREVASYRKEKREKLNQNRINLENMFDDINKNVSELKILKSDIQGSLEAISGALLKSTEVKVI  
BUsg22 GEKVTVVRDEKKAREVASYRKNKSREIKLANQRSNLSLENMFNKNFNSELKILKSDVQGSLEAISYSLLLKSTEVKVI  
HI0914 GDEATVVRDEKKAREVALYRQKGFREVKLARQKSKLENMFANMTEGVHEVNIIVLKADVQGSVEAIVQALNELSTNEVKV  
PA3655 GDEMTVVADEKKAREVALYRQKGFREVKLARAHAGKLENIIFENMGQEKKTLNIVLKADVQGSLEALQGSLSGLGNDEVQV  
PM1985 GDEATVVRDEKKAREVALYRQKGFREVKLARQKSKLENMFANMTEGVHEVNIIVLKADVQGSVEAIVQALNELSTNEVKV  
RSc140 GEEVIVLPERKAREIALFRQKGFREVKLARQKSKLENMFANMTEGVHEVNIIVLKADVQGSVEAIVQALNELSTNEVKV  
STM021 GDEVTVVRDEKKAREVALYRQKGFREVKLARQKSKLENMFANMTEGVHEVNIIVLKADVQGSVEAIDSLSLLKSTDEVKV  
STY024 GDEVTVVRDEKKAREVALYRQKGFREVKLARQKSKLENMFANMTEGVHEVNIIVLKADVQGSVEAIDSLSLLKSTDEVKV  
vc2259 GDEATVVRDEKKAREVANYRAGKGFREVKLARQKSKLENMFANMTEGVHEVNIIVLKADVQGSVEAIVQALNELSTNEVKV  
wbr31 GDKITVVKKEKKAREVAIYRQNKLERESKLRINKKIKIENVFNSLNLSSKKNINIVLKSDAHGSSQAISNALILLSNEETKI  
XAC142 GDDFVVVDDERLAKDVAQQRETTRRESRLVASATNRMEDIILAQMKGQQVNLNVIKADVQGSVEALKQSLVALSNDDIRI  
XCC137 GDDFVVVDDERLAKDVAQQRETTRRESRLVASATNRMEDIILAQMKGQQVNLNVIKADVQGSVEALKQSLVALSNDDIRI  
XF2579 GDDFVVVDDERLAKDVAQQREAKRRESRLVTSAGNRMEDIILAQMKGQQVNLNVIKADVQGSVEALKQSLVALSNDDIRI  
y3135 GDEVTVVRDEKKAREVALYRQKGFREVKLARQKSKLENMFANMTEGVHEVNIIVLKADVQGSVEAIDSLSLLKSTDEVKV  
YPO104 GDEVTVVRDEKKAREVALYRQKGFREVKLARQKSKLENMFANMTEGVHEVNIIVLKADVQGSVEAIDSLSLLKSTDEVKV  
Z0181 GDEVTVVRDEKKAREVALYRQKGFREVKLARQKSKLENMFANMTEGVHEVNIIVLKADVQGSVEAIDSLSLLKSTDEVKV

b0170 KIIGSGVGGITETDATALAASNAIILVGFNVRADASARKVIEAESLDRYYSVIYNLIDEVKAAMSGMSPKQKQIIGLA  
BBp214 NIIGKGVGGITETDATALAASNAIILVGFNVRADASARKVIEEFENVDFRYYSVIYQIIDEIKNCICGMLSPKYQKQIIGLA  
Bf131 KILSASINVTETDAVALLSSHSRILAFNVKVDLSAKNIIEFNHINIYYSVIVLLEDEKELISSIAPQVDFKVIIGIA  
bu232 KIIGLGGITETDATALAASNAIILVGFNVRADTSARKVIESEHLDLRYYSVIYDLLEDEKAAAMTGLLSPYKQKQIIGLA  
BUsg22 NIIGSGVGGITETDATALAASNAIILVGFNVRADASARKVIESEHLDLRYYSVIYDLLEDEKAAAMTGLLSPYKQKQIIGLA  
HI0914 KVVGSGVGGITETDATALAASNAIILVGFNVRADARRVIEAENIDLRYYSIIEYELNEIKAAAMSGMLPEPKQKQIIGLA  
PA3655 RVVGGVGGITESDANLALASNAVLPFGFNVRADAGARKVIEAEGLDMRYYNVIYDIIEEDVKKALTGLMGLSGLRENILGIA  
PM1985 KVVGSGVGGITETDATALAASNAIILVGFNVRADARRVIESEHLDLRYYSIIEYELNEIKAAAMSGMLPEPKQKQIIGLA  
RSc140 QVVHGAVGGITESDANLALASNAIILVGFNVRADAGARKVIEAEGLDMRYYNVIYDIIEEDVKKAAAMSGMLPEPKQKQIIGLA  
STM021 KIIGSGVGGITETDATALAASNAIILVGFNVRADASARKVIESEHLDLRYYSVIYNLIDEVKAAMSGMSPKQKQIIGLA

STY024 KIIIGSGVGGITETDATALAAASNAIIVGFNVRADASARKVIESESLDLRYYSVIYNLIDEVKAAMSGMLSPKQQIIGLA  
vc2259 NIVGSGVGGITETDVAFLAAASNAIIVGFNVRADASARRMIEAENIDLRYYSIIYQLIDEVKAAMSGMLSPKQQEIIIGLA  
wbr31 NIIYSGVGPITETDVALATSSNAIIIGFNVPDFSNIKNTESIGLNKCCSIIYEIVDFVKQKIYLSCNTKYNKIIIGIL  
XAC142 NVIHSGVGGITESDANSAAASKATIIIGFNVRADASARKIVESNGIDLRYFSIIYDVIDQVKQVASGLLGEIREEIIIGIA  
XCc137 NVIHSGVGGITESDANSAAASKATIIIGFNVRADASARKIVESNGIDLRYFSIIYDVIDQVKQVASGLLGEIREEIIIGIA  
XF2579 NVIHVGVGGITESDANSAVTSKATVIGFNVRADASARKIIEANGVDLRYFSIIYDVIDQVKQVASGLLGEIREEIIIGVA  
y3135 RIVGSGVGGITETDATALAAASGAIILGFNVRADASARRVTEGLDLRYYSVIYSLIDEVKAAMSGMLAPEYKQQIIGLA  
YPO104 RIVGSGVGGITETDATALAAASGAIILGFNVRADASARRVTEGLDLRYYSVIYSLIDEVKAAMSGMLAPEYKQQIIGLA  
Z0181 KIIIGSGVGGITETDATALAAASNAIIVGFNVRADASARKVIEAESLDRYYSVIYNLIDEVKAAMSGMLSPKQQIIGLA

b0170 EVRDVFKSPKFGAIAGCMVTEGVVKKRHNPIRVLRDNVVIYEGELESLRRFKDDVNEVRNGMECGIGVKNYNDVRTGDVIE  
BBp214 NVRSIFKSPKIGVIAGCIVMEGIKRNNSIIQILRNNVVIHKGELISLRRFKEDVSEVRGCGVECGIGMKNFNDCIEDIE  
Bf131 KVHNIFQSPRYGTIAGCMVTEGVVKKRHNPIRVLRDNVVIYEGELESLRRFKEDVSEVRGCGVECGIGMKNFNDCIEDIE  
bu232 EVRNIFKSPKFGAIAGCMVTEGVVKKRHNPIRVLRDNVVIYEGELESLRRFKEDVSEVRGCGVECGIGMKNFNDCIEDIE  
BUsG22 EVRNIFKSPKFGAIAGCMVTEGVVKKRHNPIRVLRDNVVIYEGELESLRRFKEDVSEVRGCGVECGIGMKNFNDCIEDIE  
HI0914 EVRDVFRHFKFGAIAGCMVTEGVVKKRHNPIRVLRDNVVIYEGELESLRRFKEDVSEVRGCGVECGIGMKNFNDCIEDIE  
PA3655 EVRDVFRHFKFGAIAGCMVTEGVVKKRHNPIRVLRDNVVIYEGELESLRRFKEDVSEVRGCGVECGIGMKNFNDCIEDIE  
PM1985 EVRDVFRHFKFGAIAGCMVTEGVVKKRHNPIRVLRDNVVIYEGELESLRRFKEDVSEVRGCGVECGIGMKNFNDCIEDIE  
RSc140 EVRQVVFHVPKFGAVAGCMVLDGVVKKRSSLVLRVLRNVVIFSGELESLRRFKEDVSEVRGCGVECGIGMKNFNDCIEDIE  
STM021 EVRDVFRHFKFGAIAGCMVTEGVVKKRHNPIRVLRDNVVIYEGELESLRRFKEDVSEVRGCGVECGIGMKNFNDCIEDIE  
STY024 EVRDVFRHFKFGAIAGCMVTEGVVKKRHNPIRVLRDNVVIYEGELESLRRFKEDVSEVRGCGVECGIGMKNFNDCIEDIE  
vc2259 EVRDVFRHFKFGAIAGCMVTEGVVKKRHNPIRVLRDNVVIYEGELESLRRFKEDVSEVRGCGVECGIGMKNFNDCIEDIE  
wbr31 EVRDNIFQSPKFGAIAGCMVTEGVVKKRHNPIRVLRDNVVIYEGELESLRRFKEDVSEVRGCGVECGIGMKNFNDCIEDIE  
XAC142 QVRDVFRRSSKFGAVAGCMVIEGVVKKRHNPIRVLRDNVVIYEGELESLRRFKEDVSEVRGCGVECGIGMKNFNDCIEDIE  
XCc137 QVRDVFRRSSKFGAVAGCMVIEGVVKKRHNPIRVLRDNVVIYEGELESLRRFKEDVSEVRGCGVECGIGMKNFNDCIEDIE  
XF2579 EVRDVFRHFKFGAIAGCMVTEGVVKKRHNPIRVLRDNVVIYEGELESLRRFKEDVSEVRGCGVECGIGMKNFNDCIEDIE  
y3135 EVRDVFRHFKFGAIAGCMVTEGVVKKRHNPIRVLRDNVVIYEGELESLRRFKEDVSEVRGCGVECGIGMKNFNDCIEDIE  
YPO104 EVRDVFRHFKFGAIAGCMVTEGVVKKRHNPIRVLRDNVVIYEGELESLRRFKEDVSEVRGCGVECGIGMKNFNDCIEDIE  
Z0181 EVRDVFRHFKFGAIAGCMVTEGVVKKRHNPIRVLRDNVVIYEGELESLRRFKEDVSEVRGCGVECGIGMKNFNDCIEDIE

b0170 VFEIVSLREALEKAEAGVDLVEISPNAEPPVCRIMDYGKFLYEKSKSSKEQKKKQKVIQVKEIKFRPGTDEGDYQVKLR  
BBp214 VFETVTLKSALEYKAEVGMDDLVEISPNAEPPVCRIMDYGKFLYEKSKSSKEQKKKQKVIQVKEIKFRPGTDEGDYQVKLR  
Bf131 VLDKVNFNFAIKQAEDLELDLVEISPNSDPPVCKIMNYGKFLYEKSKSTKEQKKKQKVIQVKEIKFRPGTDEGDYQVKLR  
bu232 VFEVNLREALEKAEELGLDLVEISPNAEPPVCRIMDYGKFLYEKSKSSKEQKKKQKVIQVKEIKFRPGTDEGDYQVKLR  
BUsG22 VFEVNLREALEKAEELGLDLVEISPNAEPPVCRIMDYGKFLYEKSKSSKEQKKKQKVIQVKEIKFRPGTDEGDYQVKLR  
HI0914 VFEVNSIQQALEMAEQAEGLDLVEISPNAEPPVCRIMNYGKFLYEKSKSTAKEQKKKQKVIQVKEIKFRPGTDEGDYQVKLR  
PA3655 VFEKVSIDEAIRLAEAKLGLDLVEISADAVPPVCRIMDYGKHLFEKKAQAAVAKKNQQAQVKEIKFRPGTDEGDYQVKLR  
PM1985 VFEVNSIQQALEMAEQAEGLDLVEISPNAEPPVCRIMNYGKFLYEKSKSTAKEQKKKQKVIQVKEIKFRPGTDEGDYQVKLR  
RSc140 IYEVKLFDFALRLAEKDDVLDLVEIAPTAQPPVCRIMDYGKFKYQEQKKAHEAKLQKVIQVKEIKFRPGTDDGDYEVKLR  
STM021 VFEIVSLREALEKAEAGVDLVEISPNAEPPVCRIMDYGKFLYEKSKSSKEQKKKQKVIQVKEIKFRPGTDEGDYQVKLR  
STY024 VFEIVSLREALEKAEAGVDLVEISPNAEPPVCRIMDYGKFLYEKSKSSKEQKKKQKVIQVKEIKFRPGTDEGDYQVKLR  
vc2259 VFEIVSLREALEKAEAGVDLVEISPNAEPPVCRIMDYGKFLYEKSKSSKEQKKKQKVIQVKEIKFRPGTDEGDYQVKLR  
wbr31 VFETVSIQEAALATAEESGLDLVEISPNAEPPVCRVMDYGKFLFEKSKATKEQKKKQKVIQVKEIKFRPGTDDGDYEVKLR  
XAC142 ILELVPKKEAIFKSLLEMLDLVEISPNSNPPVCKIMNYGKFLYEKSKSSKEQKKKQKVIQVKEIKFRPGTDDGDYEVKLR  
XCc137 CFERLSRDEALAKAEELGLDLVEIQPADPPVCKIMDFGKFKFEQKKKANEAKKTKQVEIKELKFRPVTDEGDYQVKLR  
XF2579 CFERLSRDEALAKAEELGLDLVEIQPADPPVCKIMDFGKFKFEQKKKANEAKKTKQVEIKELKFRPVTDEGDYQVKLR  
y3135 VFEIVSLNEALEKAEAGVDLVEISPNAEPPVCRIMDYGKFLYEKSKSTKEQKKKQKVIQVKEIKFRPGTDDGDYQVKLR  
YPO104 VFEIVSLNEALEKAEAGVDLVEISPNAEPPVCRIMDYGKFLYEKSKSTKEQKKKQKVIQVKEIKFRPGTDDGDYQVKLR  
Z0181 VFEIVSLREALEKAEAGVDLVEISPNAEPPVCRIMDYGKFLYEKSKSSKEQKKKQKVIQVKEIKFRPGTDEGDYQVKLR

b0170 SLIRFLEEGDKAKITLRFGRGEMAHQQIGMEVLRNVRKDDLQAVVESFKIEGRQMIMVLPAPKMKNIRNFSIIAHIDHGKST  
BBp214 NLVRFLEEGDKVKTTLRFGRGEMVHQKLGIDVLRNKSDDLAVVEVFRVEGRQMIMILTSKMETIRNFSIIAHVDHGKST  
Bf131 NIIKFLNDGKIKITLRFGRGELIHQQIGVRLHRISQDLHMTVEIFKVEGRQMTMLLAPKMKYIRNFSIIAHVNHGKST  
bu232 NLIRFLEDGDKAKITLRFGRGEMAHQKIGVDVLRNVRKNDLIATVEYFKIEGRQMIMVLPAPKMKNIRNFSIIAHIDHGKST  
BUsG22 NLIRFLEDGDKVKTTLRFGRGEMAHQKIGIDVLRNVRKNDLIATVEYFKIEGRQMIMVLPAPKMKNIRNFSIIAHIDHGKST  
HI0914 SLIRFLEEGDKAKITLRFGRGEMAHQDGLDVLERKNDLASVVE SARLEGRQAVMVLAPKMKNIRNFSIIAHIDHGKST  
PA3655 NLVRFLEEGDKAKVSLRFGRGEMAHQELGMELLRVEADLVGTVEQHKLEGRQLMMV IAPKLSHIRNFSIIAHIDHGKST  
PM1985 SLIRFLEEGDKAKITLRFGRGEMAHQDGLDVLERKNDLASVVE SARLEGRQAVMVLAPKMKNIRNFSIIAHIDHGKST  
RSc140 NLKRFLEDGDRTKITLRFGRGEMAHQDGLDVLERKNDLASVVE SARLEGRQAVMVLAPKMKNIRNFSIIAHIDHGKST  
STM021 SLIRFLEEGDKAKITLRFGRGEMAHQQIGMEVLRNVRKDDLQAVVESFKIEGRQMIMVLPAPKMKNIRNFSIIAHIDHGKST  
STY024 SLIRFLEEGDKAKITLRFGRGEMAHQQIGMEVLRNVRKDDLQAVVESFKIEGRQMIMVLPAPKMKNIRNFSIIAHIDHGKST  
vc2259 NLIRFLEEGDKVKTTLRFGRGEMAHQDGLDVLERKNDLASVVE SARLEGRQAVMVLAPKMKNIRNFSIIAHIDHGKST  
wbr31 NLTRFLENGKVKVSLRFGRGEMVHKIGINMLNRICSDLKSSIESFKIEGRQMTLILVPMENIRNFSIIAHINHGKST  
XAC142 NMRRFLEEGDKVKNIRFRGEMSHQELGRGEMAAIEADLGVIE SRRLEGRQMVMV IAPKMRNIRNFSIIAHVDHGKST  
XCc137 NMRRFLEEGDKVKNIRFRGEMSHQELGRGEMAAIEADLGVIE SRRLEGRQMVMV IAPKMRNIRNFSIIAHVDHGKST  
XF2579 NMRRFLEEGDKVKNIRFRGEMSHQELGRQMATRIEMDLGVVIE SRRLEGRQMVMV IAPKMRNIRNFSIIAHVDHGKST  
y3135 NLIRFLEDGDKAKITLRFGRGEMAHQQIGMEVLRNVRKDDLQAVVESFKIEGRQMIMVLPAPKMKNIRNFSIIAHIDHGKST  
YPO104 NLIRFLEDGDKAKITLRFGRGEMAHQQIGMEVLRNVRKDDLQAVVESFKIEGRQMIMVLPAPKMKNIRNFSIIAHIDHGKST  
Z0181 SLIRFLEEGDKAKITLRFGRGEMAHQQIGMEVLRNVRKDDLQAVVESFKIEGRQMIMVLPAPKMKNIRNFSIIAHIDHGKST

b0170 LSDRIIQICGGLSDREMEAQVLDSDMLERERGITIKAQSVTLTDYKADGETYQLNFIDTPGHVDFSYEVSRS LAACEGALL  
BBp214 ISDRLIQICGGLSKREMHSQVLDSDMLERERGITIKSQSVTIEYKSNCKIIQMNFIIDTPGHVDFSYEVSRS LAACEGALL  
Bf131 LSDRFIQICGGLCDREMSQVLDSDMLERERGITIKSQSVTLNYSNEQFYQLNFIIDTPGHVDFSYEVSRS LAACEGALL  
bu232 LSDRLIQICGGLSEREMSNQVLDSDMLERERGITIKAQSVTLNYSNEQFYQLNFIIDTPGHVDFSYEVSRS LAACEGALL  
BUsG22 LSDRLIQKCGGLSEREMSDQVLDSDMLERERGITIKAQSVTLNYSNEQFYQLNFIIDTPGHVDFSYEVSRS LAACEGALL  
HI0914 LSDRLIQKCGGLSDREMEAQVLDSDMLERERGITIKAQSVTLNYSNEQFYQLNFIIDTPGHVDFSYEVSRS LAACEGALL  
PA3655 LADRFIQKCGGLSDREMEAQVLDSDMLERERGITIKAQSVTLNYSNEQFYQLNFIIDTPGHVDFSYEVSRS LAACEGALL  
PM1985 LSDRLIQKCGGLSDREMEAQVLDSDMLERERGITIKAQSVTLNYSNEQFYQLNFIIDTPGHVDFSYEVSRS LAACEGALL  
RSc140 LADRILQKCGGLSDREMEAQVLDSDMLERERGITIKAQSVTLNYSNEQFYQLNFIIDTPGHVDFSYEVSRS LAACEGALL  
STM021 LSDRLIQKCGGLSDREMEAQVLDSDMLERERGITIKAQSVTLNYSNEQFYQLNFIIDTPGHVDFSYEVSRS LAACEGALL  
STY024 LSDRIIQICGGLSDREMEAQVLDSDMLERERGITIKAQSVTLNYSNEQFYQLNFIIDTPGHVDFSYEVSRS LAACEGALL  
vc2259 LSDRLIQKCGGLSDREMEAQVLDSDMLERERGITIKAQSVTLNYSNEQFYQLNFIIDTPGHVDFSYEVSRS LAACEGALL  
wbr31 LSDRLIQKCGGLSDREMEAQVLDSDMLERERGITIKAQSVTLNYSNEQFYQLNFIIDTPGHVDFSYEVSRS LAACEGALL  
XAC142 LADRILQKCGGLQAREMEAQVLDSDMLERERGITIKAQSVTLNYSNEQFYQLNFIIDTPGHVDFSYEVSRS LAACEGALL  
XCc137 LADRILQKCGGLQAREMEAQVLDSDMLERERGITIKAQSVTLNYSNEQFYQLNFIIDTPGHVDFSYEVSRS LAACEGALL  
XF2579 LADRILQKCGGLQAREMEAQVLDSDMLERERGITIKAQSVTLNYSNEQFYQLNFIIDTPGHVDFSYEVSRS LAACEGALL  
y3135 LSDRIIQICGGLSEREMAAQVLDSDMLERERGITIKAQSVTLNYSNEQFYQLNFIIDTPGHVDFSYEVSRS LAACEGALL

YPO104 LSDRIIQICGGLSEREMAAQVLDSDMLERERGITIKAQSVTLTDYHSDGQTYQLNFIDTPGHVDFSYEVSRSLAACEGALL  
Z0181 LSDRIIQICGGLSDREMAQVLDSDMLERERGITIKAQSVTLTDYKADGETYQLNFIDTPGHVDFSYEVSRSLAACEGALL

b0170 VVDAGQGVEAQTLANCYTAMEMDLEVPVNLKIDLPAADPERVAEEIEDIVGIDATDAVRCSAKTGVGVQDVLRLVRDI  
BBp214 I IDATQGV EAQTIANCHTALDMNLKVIPIILNKIDLPTADPQRVKKEIEDI IGLSTNNIILCSAKTGGITNLLETITHNI  
Bf131 VVDAAGQIEAQTVANRYIAMERDLKVI IALNKIDLPTADINRVSKETEEIIGINSNDIILCSAKTGLGVLDILERIIDI  
bu232 VVDSTQGV EAQTLANCYTAIDMNVIEVPVNLKIDLPSNADKVAKEIEDI IGI PALDAIRCSAKTGGIEEDLIERIINDI  
BUsq22 VVDSTQGV EAQTLANCYTAIDMNVIEVPVNLKIDLPSNADKVAKEIEKEI IGI SALDAIRCSAKTGGIEEIELEQI IKKI  
HI0914 VVDAGQGVEAQTLANCYTAIEMDLEVPVNLKIDLPAADPERVAEEIEDIVGIDAMEAVRCSAKTGVGIEDVLEEIVAKI  
PA3655 VVDAGQGVEAQSVCYTAIEQGLEVPVNLKMDLPAEPERVKKEIESI IGI DATDAVACS AKSGMGLVLEVLRLVTAI  
PM1985 VVDAGQGVEAQTLANCYTAIEMNLEVPVNLKIDLPAADPERVAEEIEDIVGIDAMEAVRCSAKTGVGIEDVLEEIVAKI  
RSc140 VVDASQGVEAQTVCYTAIELGVEVPVNLKIDLPAADPSAIQIEIEDIVGIDAQDATRCSAKTGVGVDPVLEALIAKV

STM021 VVDAGQGVEAQTLANCYTAMEMDLEVPVNLKIDLPAADPERVAEEIEDIVGIDATDAVRCSAKTGVGVTDVLERLVRDI  
STY024 VVDAGQGVEAQTLANCYTAMEMDLEVPVNLKIDLPAADPERVAEEIEDIVGIDATDAVRCSAKTGVGVTDVLERLVRDI  
vc2259 VVDAGQGVEAQTLANCYTAIEMDLEVPVNLKIDLPAEPERVAEEIEDIVGIDAIDAVRCSAKTGVGVDEVLEKIVSAI  
wbr31 I IDSSQIEAQTIANFYCAIEMKIKI I PVNLKIDLPSNDPK I I SKKEI ESKEI ESKEI ESKEI I ENIVCNL  
XAC142 VVDAAGQVEAQSVCYTAIEQGLEVPVNLKIDLPTADVDRAKAEIEAVIGIDAEDAVAVSAKTGLNIDLVEAIVHRI  
XCC137 VVDAAGQVEAQSVCYTAIEQGLEVPVNLKIDLPTADI ERAKAEIEAVIGIDAEDAVAVSAKTGLNIDLVEAIVHRI  
XF2579 VVDASQGVEAQSVCYTAIEQGLEVPVNLKIDLPTADVDRAKAEIEAVIGIDASEAVAVSAKTGLNIDLVEAIVHRI  
y3135 VVDAGQGVEAQTLANCYTAMEMDLEVPVNLKIDLPAADPERVAEEIEDIVGIDATDAIRCSAKTGVGVDPVLERLVRDI  
YPO104 VVDAGQGVEAQTLANCYTAMEMDLEVPVNLKIDLPAADPERVAEEIEDIVGIDATDAIRCSAKTGVGVDPVLERLVRDI  
Z0181 VVDAGQGVEAQTLANCYTAMEMDLEVPVNLKIDLPAADPERVAEEIEDIVGIDATDAVRCSAKTGVGVQDVLRLVRDI

b0170 PPPEGDPEGLQALI IDSWFDNYLGVVSLRIRKNGTLRKGDKVKVMSTGQTYNADRLGIFTPKQVDRTELKCGEVGWLVC  
BBp214 PYPKGNPNLPLQALI IDSWFDNYLGVVSLRIRKNGTLRKGDKVKVMSTGQTYNADRLGIFTPKQVDRTELKCGEVGWLVC  
Bf131 PVPQGNCDAPLQALI IDSWFNLYLVISLIVKNGILHKGDTIQSMNTGQIYIVNQLGIFTPKQVDRTELKCGEVGWLVC  
bu232 PYPKGSINSPLQALI IDSWFDNYLGVVSLRIRKNGTLRKGDKVKVMSTGQTYNADRLGIFTPKQVDRTELKCGEVGWLVC  
BUsq22 PAPEGDPEGLQALI IDSWFDNYLGVVSLRIRKNGTLRKGDKIKVMSTGQTYNADRLGIFTPKQVDRTELKCGEVGWLVC  
HI0914 PAPEGDPEGLQALI IDSWFDNYLGVVSLRIRKNGTLRKGDKIKVMSTGQTYNADRLGIFTPKQVDRTELKCGEVGWLVC  
PA3655 PAPEGEIEAPLQALI IDSWFDNYLGVVSLRIRKNGTLRKGDKIKVMSTGQTYNADRLGIFTPKQVDRTELKCGEVGWLVC  
PM1985 PAPEGDPEGLQALI IDSWFDNYLGVVSLRIRKNGTLRKGDKIKVMSTGQTYNADRLGIFTPKQVDRTELKCGEVGWLVC  
RSc140 PPKQDPPDAPLQALI IDSWFDNYLGVVSLRIRKNGTLRKGDKIKVMSTGQTYNADRLGIFTPKQVDRTELKCGEVGWLVC  
STM021 PPPQDPPDAPLQALI IDSWFDNYLGVVSLRIRKNGTLRKGDKIKVMSTGQTYNADRLGIFTPKQVDRTELKCGEVGWLVC  
STY024 PPKQDPPDAPLQALI IDSWFDNYLGVVSLRIRKNGTLRKGDKIKVMSTGQTYNADRLGIFTPKQVDRTELKCGEVGWLVC  
vc2259 PPKQDPPDAPLQALI IDSWFDNYLGVVSLRIRKNGTLRKGDKIKVMSTGQTYNADRLGIFTPKQVDRTELKCGEVGWLVC  
wbr31 TPIIGNINKPLQALI IDSWFDNYLGI IIVLIRKNGTLRKGDKIKVMSTGQTYNADRLGIFTPKQVDRTELKCGEVGWLVC  
XAC142 PPKPRDRTDKLQALI IDSWFDNYLGVVSLRIRKNGTLRKGDKIKVMSTGQTYNADRLGIFTPKQVDRTELKCGEVGWLVC  
XCC137 PPKPRDRTDKLQALI IDSWFDNYLGVVSLRIRKNGTLRKGDKIKVMSTGQTYNADRLGIFTPKQVDRTELKCGEVGWLVC  
XF2579 PPKPRDRTDKLQALI IDSWFDNYLGVVSLRIRKNGTLRKGDKIKVMSTGQTYNADRLGIFTPKQVDRTELKCGEVGWLVC  
y3135 PAPEGDPEGLQALI IDSWFDNYLGVVSLRIRKNGTLRKGDKIKVMSTGQTYNADRLGIFTPKQVDRTELKCGEVGWLVC  
YPO104 PAPEGDPEGLQALI IDSWFDNYLGVVSLRIRKNGTLRKGDKIKVMSTGQTYNADRLGIFTPKQVDRTELKCGEVGWLVC  
Z0181 PPPEGDPEGLQALI IDSWFDNYLGVVSLRIRKNGTLRKGDKVKVMSTGQTYNADRLGIFTPKQVDRTELKCGEVGWLVC

b0170 AIKHGAPVGDTLTLARPAEKALPGFKKVKPQVYAGLFPVSSDDYEAFRDALGKLSLNDASLFFYEPSSALGFGFRGCGFL  
BBp214 GIRTGAPVGDITIQHPSAKKVLVSGFKKIKPKIYAGLFTIQSNQFSLFRDALGKLSLNDASLFFYEPSSALGFGFRGCGFL  
Bf131 TSKMGAPVGDITLTLPAQKSLPNFKKI QPYYAGLFPAGSTSQKGFADALYKLSLNDASLFFYEPSSALGFGFRGCGFL  
bu232 GIKIAAPVGDITLTAKPAKNI IGFKKIKPKIYAGLFPVSDQYEMFRDALGKLSLNDASLFFYEPSSALGFGFRGCGFL  
BUsq22 GIKSAPVGDITLTAKPAMNMLTGFKKIKPKIYAGLFPVSDQYEMFRDALGKLSLNDASLFFYEPSSALGFGFRGCGFL  
HI0914 AIKLGAPVGDITLTHQSATEVLPFGFKKVKPQVYAGLFPVSSDDYEAFRDALGKLSLNDASLFFYEPSSALGFGFRGCGFL  
PA3655 GIKHGAPVGDITLTLNPNPDEVLPGFKKVKPQVYAGLFPVSSDDYEAFRDALGKLSLNDASLFFYEPSSALGFGFRGCGFL  
PM1985 AIKLGAPVGDITLTSHPASSVLPFGFKKVKPQVYAGLFPVSSDDYEAFRDALGKLSLNDASLFFYEPSSALGFGFRGCGFL  
RSc140 GIKKAAKVKPDLTITHVVKADAPLPGFKKVKPQVYAGLFPVSSDDYEAFRDALGKLSLNDASLFFYEPSSALGFGFRGCGFL  
STM021 AIKLGAPVGDITLSARPAEKALPGFKKVKPQVYAGLFPVSSDDYEAFRDALGKLSLNDASLFFYEPSSALGFGFRGCGFL  
STY024 AIKLGAPVGDITLSARPAEKALPGFKKVKPQVYAGLFPVSSDDYEAFRDALGKLSLNDASLFFYEPSSALGFGFRGCGFL  
vc2259 GIKMGAPVGDITLTLAKGCEKALPGFKKVKPQVYAGLFPVSSDDYEAFRDALGKLSLNDASLFFYEPSSALGFGFRGCGFL  
wbr31 SIKKGAPVGDITLTLASPSEKMLPGFKKIKPKVFAIFPTISEKYQSLKNGLIKLSLNDASLFFYEPSSALGFGFRGCGFL  
XAC142 SIKHGAPVGDITLTLAAGPAPHALPGFQEMQPRVFAGLFPVDAEDYDPLREALDKLRNLDAALRFEPESEAMGFGFRGCGFL  
XCC137 SIKHGAPVGDITLTLAAGPAPHALPGFQEMQPRVFAGLFPVDAEDYDPLREALDKLRNLDAALRFEPESEAMGFGFRGCGFL  
XF2579 SIKHGAPVGDITLTLANPAPKPLPGFQEVQPRVFAGLFPVDAEDYDPLREALDKLRNLDAALRFEPESEAMGFGFRGCGFL  
y3135 AIKLGAPVGDITLTLTRPAEKSLPGFKKVKPQVYAGLFPVSSDDYEAFRDALGKLSLNDASLFFYEPSSALGFGFRGCGFL  
YPO104 AIKLGAPVGDITLTLTRPAEKSLPGFKKVKPQVYAGLFPVSSDDYEAFRDALGKLSLNDASLFFYEPSSALGFGFRGCGFL  
Z0181 AIKHGAPVGDITLTLARPAEKALPGFKKVKPQVYAGLFPVSSDDYEAFRDALGKLSLNDASLFFYEPSSALGFGFRGCGFL

b0170 GLLHMEIIQERLEREYDLDLIT TAPTVVYEVETTSREVIYVDSPSKLPVANNIYELREPIAECMMLLPQAYLGNVITLVCV  
BBp214 GILHMEIVQARLEREYNLQI IATSPTVIYKI IMIDNTNYYLDTPHKLSLTLQIKEIREPIAKCLILLP IKYLGNTLLCS  
Bf131 GLLHMEIIQERLREYDLDLIT TAPTVVYEVETTSREVIYVDSPSKLPVANNIYELREPIAECMMLLPQAYLGNVITLVCV  
bu232 GVLHMEIIQARLEREYSIDLIT TAPTVVYEVETTSREVIYVDSPSKLPVANNIYELREPIAECMMLLPQAYLGNVITLVCV  
BUsq22 GLLHMEIIQARLEREYSIDLIT TAPTVVYEVETTSREVIYVDSPSKLPVANNIYELREPIAECMMLLPQAYLGNVITLVCV  
HI0914 GLLHMEIIQERLEREYDLDLIT TAPTVVYEVETTSREVIYVDSPSKLPVANNIYELREPIAECMMLLPQAYLGNVITLVCV  
PA3655 GMLHMEIIQERLEREYDLDLIT TAPTVVYEVETTSREVIYVDSPSKLPVANNIYELREPIAECMMLLPQAYLGNVITLVCV  
PM1985 GLLHMEIIQERLEREYDLDLIT TAPTVVYEVETTSREVIYVDSPSKLPVANNIYELREPIAECMMLLPQAYLGNVITLVCV  
RSc140 GLLHMEIIQERLEREYDLDLIT TAPTVVYEVETTSREVIYVDSPSKLPVANNIYELREPIAECMMLLPQAYLGNVITLVCV  
STM021 GLLHMEIIQERLEREYDLDLIT TAPTVVYEVETTSREVIYVDSPSKLPVANNIYELREPIAECMMLLPQAYLGNVITLVCV  
STY024 GLLHMEIIQERLEREYDLDLIT TAPTVVYEVETTSREVIYVDSPSKLPVANNIYELREPIAECMMLLPQAYLGNVITLVCV  
vc2259 GMLHMEIIQERLEREYDLDLIT TAPTVVYEVETTSREVIYVDSPSKLPVANNIYELREPIAECMMLLPQAYLGNVITLVCV  
wbr31 GLLHMEIIQERLEREYDLDLIT TAPTVVYEVETTSREVIYVDSPSKLPVANNIYELREPIAECMMLLPQAYLGNVITLVCV  
XAC142 GMLHMEIIQERLEREYDLDLIT TAPTVVYEVETTSREVIYVDSPSKLPVANNIYELREPIAECMMLLPQAYLGNVITLVCV  
XCC137 GMLHMEIIQERLEREYDLDLIT TAPTVVYEVETTSREVIYVDSPSKLPVANNIYELREPIAECMMLLPQAYLGNVITLVCV  
XF2579 GMLHMEIIQERLEREYDLDLIT TAPTVVYEVETTSREVIYVDSPSKLPVANNIYELREPIAECMMLLPQAYLGNVITLVCV  
y3135 GLLHMEIIQERLEREYDLDLIT TAPTVVYEVETTSREVIYVDSPSKLPVANNIYELREPIAECMMLLPQAYLGNVITLVCV  
YPO104 GLLHMEIIQERLEREYDLDLIT TAPTVVYEVETTSREVIYVDSPSKLPVANNIYELREPIAECMMLLPQAYLGNVITLVCV  
Z0181 GLLHMEIIQERLEREYDLDLIT TAPTVVYEVETTSREVIYVDSPSKLPVANNIYELREPIAECMMLLPQAYLGNVITLVCV

b0170 EKRGVQNTMVIYHGNQVALTYEIPMAEVVLDFFDRKLSSTRGYASLDYFNKFRQASDMVRVLDLINGERVDLALITHRDN  
BBp214 QRRGVQNTMVIYHGNQVALTYEIPMAEVVLDFFDRKLSSTRGYASLDYFNKFRQASDMVRVLDLINGERVDLALITHRDN  
Bf131 EKRGVQVSLVYKADQVMLTYELPMSEI I LDFDRMKSISNGYASLEYTFNFRQASDMVCIEI LINGQRVNALAVIHRIT

bu232 KKRGVQINMZYHSHQVLLKYNIPMNEVILNFFDELKSVSSGYASLEYDFKYFQSVKMRVIDILINSEKVDALTILSYHKN  
BUsg22 KKRGTINMZYHSHQVLLKYNIPMNEVILNFFDELKSVSSGYASLEYDFKYFQSVKMRVIDILINSEKVDALTIVISYKKN  
HI0914 EKRGVQTNMZYHSHQVLLKYNIPMGEVVDLDFDRLKSTSRGYASLDYGFKRFQADMRVVDIMINSERVDALALIVHKDN  
PA3655 EKRGVQTNMZYHSHQVLLKYNIPMGEVVDLDFDRLKSTSRGYASLDYGFKRFQADMRVVDLIMINGEVDALALIVHRDN  
PM1985 EKRGVQTNMZYHSHQVLLKYNIPMGEVVDLDFDRLKSTSRGYASLDYGFKRFQADMRVVDLIMINGEVDALALIVHKDN  
RSc140 QKRGSQINMZYHSHQVLLKYNIPMGEVVDLDFDRLKSTSRGYASLDYGFKRFQADMRVVDLIMINGEVDALALIVHRDN  
STM021 EKRGVQTNMZYHSHQVLLKYNIPMGEVVDLDFDRLKSTSRGYASLDYGFKRFQADMRVVDLIMINGEVDALALIVHRDN  
STY024 EKRGVQTNMZYHSHQVLLKYNIPMGEVVDLDFDRLKSTSRGYASLDYGFKRFQADMRVVDLIMINGEVDALALIVHRDN  
vc2259 EKRGTQVDMZYHSHQVLLKYNIPMGEVVDLDFDRLKSTSRGYASLDYGFKRFQADMRVVDLIMINGEVDALALIVHRDN  
wbr31 EKRGIQNNLIYLENKVI I I Y I I P M S E I I L D F F D K L Q S I S N G Y A S L D Y K F C F N K T D S V V I Q T Y I N K K L I D S L T K V I N K N Y  
XAC142 EKRGTQIGINYLGSQVQI SYELPMAEVVDLDFDRLKSTSRGYASLDYGFKRFQADMRVVDLIMINGEVDALALIVHRGH  
XCC137 EKRGSQIGINYLGSQVQI SYELPMAEVVDLDFDRLKSTSRGYASLDYGFKRFQADMRVVDLIMINGEVDALALIVHRSY  
XF2579 EKRGSQIGITYLGNQVQVAYELPMAEVVDLDFDRLKSTSRGYASLDYGFKRFQADMRVVDLIMINGEVDALALIVHRHQ  
y3135 EKRGTQTNMZYHSHQVLLKYNIPMGEVVDLDFDRLKSTSRGYASLDYGFKRFQADMRVVDLIMINGEVDALALIVHRDN  
YPO104 EKRGTQTNMZYHSHQVLLKYNIPMGEVVDLDFDRLKSTSRGYASLDYGFKRFQADMRVVDLIMINGEVDALALIVHRDN  
Z0181 EKRGVQTNMZYHSHQVLLKYNIPMGEVVDLDFDRLKSTSRGYASLDYGFKRFQADMRVVDLIMINGEVDALALIVHRDN

b0170 SQNRGRELVEKMKDLIPRQQFDIAIQAAIGTHI IARSTVKQLRKNVLAKCYGGDISRKKKLLQKQKQEGKKRMKQIGNVEL  
BBp214 ILNQAQNVVEKMKDLIPRQQFDIAIQAAIGTHI IARSTVKQLRKNVLAKCYGGDISRKKKLLQKQKQEGKKRMKQIGNVEL  
Bf131 AEFQGRILGNVNLKSLILRQQFDIVIQAAIGTHI IARSTVKQLRKNVLAKCYGGDISRKKKLLQKQKQEGKKRMKQIGNVEL  
bu232 AQSRREIVDKMKDLIPRQQFDIAIQAAIGTHI IARSTVKQLRKNVLAKCYGGDISRKKKLLQKQKQEGKKRMKQIGNVEL  
BUsg22 AQNRAREIVNKMDELIPRQQFDIAIQAAIGTHI IARSTVKQLRKNVLAKCYGGDISRKKKLLQKQKQEGKKRMKQIGNVEL  
HI0914 SQNRGRELVEKMKDLIPRQQFDIAIQAAIGTHI IARSTVKQLRKNVLAKCYGGDISRKKKLLQKQKQEGKKRMKQIGNVEL  
PA3655 APYKGRQLVEKMKDLIPRQQFDIAIQAAIGTHI IARSTVKQLRKNVLAKCYGGDISRKKKLLQKQKQEGKKRMKQIGNVEL  
PM1985 APYRAREIVNKMDELIPRQQFDIAIQAAIGTHI IARSTVKQLRKNVLAKCYGGDISRKKKLLQKQKQEGKKRMKQIGNVEL  
RSc140 SAYRGREVAAMKREIIPRQMYDVAIQAAIGTHI IARSTVKQLRKNVLAKCYGGDISRKKKLLQKQKQEGKKRMKQIGNVEL  
STM021 SQSRGRELVEKMKDLIPRQQFDIAIQAAIGTHI IARSTVKQLRKNVLAKCYGGDISRKKKLLQKQKQEGKKRMKQIGNVEL  
STY024 SQSRGRELVEKMKDLIPRQQFDIAIQAAIGTHI IARSTVKQLRKNVLAKCYGGDISRKKKLLQKQKQEGKKRMKQIGNVEL  
vc2259 SQTGRQLVEKMKDLIPRQQFDIAIQAAIGTHI IARSTVKQLRKNVLAKCYGGDISRKKKLLQKQKQEGKKRMKQIGNVEL  
wbr31 INLYSKTTIENLKKIIPRQQFDIVIHKINNKIISKGIVKQVRKNVLEKCYGGDISRKKKLLQKQKQEGKKRMKQIGNVEL  
XAC142 ADDRRELCCEKMKDLIPRQQFDIAIQAAIGTHI IARSTVKQLRKNVLAKCYGGDISRKKKLLQKQKQEGKKRMKQIGNVEL  
XCC137 ADDRRELCCEKMKDLIPRQQFDIAIQAAIGTHI IARSTVKQLRKNVLAKCYGGDISRKKKLLQKQKQEGKKRMKQIGNVEL  
XF2579 AERRGRELVEKMKDLIPRQQFDIAIQAAIGTHI IARSTVKQLRKNVLAKCYGGDISRKKKLLQKQKQEGKKRMKQIGNVEL  
y3135 AQYRGRDLVEKMKDLIPRQQFDIAIQAAIGTHI IARSTVKQLRKNVLAKCYGGDISRKKKLLQKQKQEGKKRMKQIGNVEL  
YPO104 AQYRGRDLVEKMKDLIPRQQFDIAIQAAIGTHI IARSTVKQLRKNVLAKCYGGDISRKKKLLQKQKQEGKKRMKQIGNVEL  
Z0181 SQNRGRELVEKMKDLIPRQQFDIAIQAAIGTHI IARSTVKQLRKNVLAKCYGGDISRKKKLLQKQKQEGKKRMKQIGNVEL

b0170 PQEAFLAAILHVSIVAKLEALHERHEEVQALLGERFRALSREYAQLSDVSRCTDWQQVQEDIETAQMMDPREMAQDEL  
BBp214 PQEAFVFLKILNNSMMKLESLSHRYEEIESMLSEKFRLESQEYKLSLDINFCVQWKNCNHVDIETKLLDSELHDVAEQEL  
Bf131 PNTVFMISILNRLINLKLMSLQRFYKLEKLSLNKFEYSLSKHEYTLHEI IKYFEEWLN I QKN I VHTTKMDI DMHDI VQDEL  
bu232 PKTVFLSILNLSILNKLKSLRNRYQIEI I LSKNFLLSKYELKLSLSEI IKYFEEWLN I QKN I VHTTKMDI DMHDI VQDEL  
BUsg22 PKTAFDLILNLSIFNKLKSLRNRYEEIESMLSEKFRLESQEYKLSLDINFCVQWKNCNHVDIETKLLDSELHDVAEQEL  
HI0914 PQEAFLAAILHVSIVAKLEALHERHEEVQALLGERFRALSREYAQLSDVSRCTDWQQVQEDIETAQMMDPREMAQDEL  
PA3655 PQEAFLAAILHVSIVAKLEALHERHEEVQALLGERFRALSREYAQLSDVSRCTDWQQVQEDIETAQMMDPREMAQDEL  
PM1985 PQEAFLAAILHVSIVAKLEALHERHEEVQALLGERFRALSREYAQLSDVSRCTDWQQVQEDIETAQMMDPREMAQDEL  
RSc140 PQEAFLAAILHVSIVAKLEALHERHEEVQALLGERFRALSREYAQLSDVSRCTDWQQVQEDIETAQMMDPREMAQDEL  
STM021 PQEAFLAAILHVSIVAKLEALHERHEEVQALLGERFRALSREYAQLSDVSRCTDWQQVQEDIETAQMMDPREMAQDEL  
STY024 PQEAFLAAILHVSIVAKLEALHERHEEVQALLGERFRALSREYAQLSDVSRCTDWQQVQEDIETAQMMDPREMAQDEL  
vc2259 PQEAFLAAILHVSIVAKLEALHERHEEVQALLGERFRALSREYAQLSDVSRCTDWQQVQEDIETAQMMDPREMAQDEL  
wbr31 PQEAFVFLKILNNSMMKLESLSHRYEEIESMLSEKFRLESQEYKLSLDINFCVQWKNCNHVDIETKLLDSELHDVAEQEL  
XAC142 PQEAFVFLKILNNSMMKLESLSHRYEEIESMLSEKFRLESQEYKLSLDINFCVQWKNCNHVDIETKLLDSELHDVAEQEL  
XCC137 PQEAFVFLKILNNSMMKLESLSHRYEEIESMLSEKFRLESQEYKLSLDINFCVQWKNCNHVDIETKLLDSELHDVAEQEL  
XF2579 PQEAFVFLKILNNSMMKLESLSHRYEEIESMLSEKFRLESQEYKLSLDINFCVQWKNCNHVDIETKLLDSELHDVAEQEL  
y3135 PQEAFVFLKILNNSMMKLESLSHRYEEIESMLSEKFRLESQEYKLSLDINFCVQWKNCNHVDIETKLLDSELHDVAEQEL  
YPO104 PQEAFVFLKILNNSMMKLESLSHRYEEIESMLSEKFRLESQEYKLSLDINFCVQWKNCNHVDIETKLLDSELHDVAEQEL  
Z0181 PQEAFVFLKILNNSMMKLESLSHRYEEIESMLSEKFRLESQEYKLSLDINFCVQWKNCNHVDIETKLLDSELHDVAEQEL

b0170 REAKEKSEQLEQQQLVLLPKDPERNAFLVRAGTGGDEAALFAGDLFRMYSRYAEARRWRVEIMSSEGEHGGYKEIIA  
BBp214 QMSKMKKLEIETIQVLLLPDQPCQNCFLERSASGGDEAALFAGDLFRMYSRYAEARRWRVEIMSSEGEHGGYKEIIA  
Bf131 KILNNTSKHNLENKIKILLFSDPQQYCNFIELRAGTGGKEAALFAGDLFRMYSRYAEARRWRVEIMSSEGEHGGYKEIIA  
bu232 YFFNKKKALEKKINQLLPEDPKHSFCFIELRAGTGGDEAALFAGDLFRMYSRYAEARRWRVEIMSSEGEHGGYKEIIA  
BUsg22 FIVKQKLEEKIKILLLPDQPCQNCFLERSASGGDEAALFAGDLFRMYSRYAEARRWRVEIMSSEGEHGGYKEIIA  
HI0914 EESKAEIEEVEQQQLVLLPKDPEYNCYLEIRAGTGGDEAALFAGDLFRMYSRYAEARRWRVEIMSSEGEHGGYKEIIA  
PA3655 AEARGRLAALGDSLQRMLLPKDPNRVFLERAGTGGDEAALFAGDLFRMYSRYAEARRWRVEIMSSEGEHGGYKEIIA  
PM1985 EACKTEIEQVEQQQLVLLPKDPEYNCYLEIRAGTGGDEAALFAGDLFRMYSRYAEARRWRVEIMSSEGEHGGYKEIIA  
RSc140 RAARERMTTLEAELQRLLPKDPHRNIFLEIRAGTGGDESALFAGDLFRMYSRYAEARRWRVEIMSSEGEHGGYKEIIA  
STM021 REAKEKSEQLEQQQLVLLPKDPERNAFLVRAGTGGDEAALFAGDLFRMYSRYAEARRWRVEIMSSEGEHGGYKEIIA

STY024 REAKEKSEQLEQQQLVLLPKDPERNAFLVRAGTGGDEAALFAGDLFRMYSRYAEARRWRVEIMSSEGEHGGYKEIIA  
vc2259 KAAKAAIERLTDELQILLLPKDPRNCFLEIRAGGDEAALFAGDLFRMYSRYAEARRWRVEIMSSEGEHGGYKEIIA  
wbr31 NIYKNNKLLIEKKIILYLI PNEDI CNCFIEIRSGTGGKEASLFRVRLCRMYIKYSEIKNWKTDIINYSNSEHGGYKEIIA  
XAC142 AAAQARLEQLDAQLASLLVPRDPDGNLFLEVRAGTGGDEAALFAGDLFRMYSRYAEARRWRVEIMSSEGEHGGYKEIIA  
XCC137 LAAQARLDELDAQLALLVPRDPDGNLFLEVRAGTGGDEAALFAGDLFRMYSRYAEARRWRVEIMSSEGEHGGYKEIIA  
XF2579 AIAQAHLTTDEELQRLLIPODPCNLFLEVRAGTGGDEAALFAGDLFRMYSRYAEARRWRVEIMSSEGEHGGYKEIIA  
y3135 KIAKARSEELQQLVLLPKDPERDPCFLEIRAGTGGDEAALFAGDMFRMYSRYAEARRWRVEIMSSEGEHGGYKEIIA  
YPO104 KIAKARSEELQQLVLLPKDPERDPCFLEIRAGTGGDEAALFAGDMFRMYSRYAEARRWRVEIMSSEGEHGGYKEIIA  
Z0181 REAKEKSEQLEQQQLVLLPKDPERNAFLVRAGTGGDEAALFAGDLFRMYSRYAEARRWRVEIMSSEGEHGGYKEIIA

b0170 KISGDGVYGRLLKFESGGHRVQRPVPTESQGRVHTSCTIVAVIPVPPKKEVGNINDLKIDTFRSSGAGGQHVNTTDSAIRI  
BBp214 KITGKSYGKLLKFESGGHRVQRPVPTESQGRVHTSCTIVAVIPVPPKKEVGNINDLKIDTFRSSGAGGQHVNTTDSAIRI  
Bf131 KVPVHGSYGQLKFESGGHRVQRPVPTESQGRVHTSCTIVAVIPVPPKKEVGNINDLKIDTFRSSGAGGQHVNTTDSAIRI  
bu232 KITGRGACGRLLKFESGGHRVQRPVPTESQGRVHTSCTIVAVIPVPPKKEVGNINDLKIDTFRSSGAGGQHVNTTDSAIRI  
BUsg22 KITGKSYGKLLKFESGGHRVQRPVPTESQGRVHTSCTIVAVIPVPPKKEVGNINDLKIDTFRSSGAGGQHVNTTDSAIRI  
HI0914 KVTGEGVYGLKFESGGHRVQRPVPTESQGRVHTSCTIVAVIPVPPKKEVGNINDLKIDTFRSSGAGGQHVNTTDSAIRI  
PA3655 RVNEDNVYAKLLKFESGHRVQRPVPTESQGRVHTSCTIVAVIPVPPKKEVGNINDLKIDTFRSSGAGGQHVNTTDSAIRI  
PM1985 KVNEDNVYGLKFESGGHRVQRPVPTESQGRVHTSCTIVAVIPVPPKKEVGNINDLKIDTFRSSGAGGQHVNTTDSAIRI  
RSc140 RLVGEGAYSRLKFESGGHRVQRPVPTESQGRVHTSCTIVAVIPVPPKKEVGNINDLKIDTFRSSGAGGQHVNTTDSAIRI

STM021 KISGDGVYGRLLKFESGGHRVQRPATESQGR IHTSACTVAVMPELPEAEDINPADLRIDTFRSSGAGGQHVTNTDSAIRI  
STY024 KISGDGVYGRLLKFESGGHRVQRPATESQGR IHTSACTVAVMPELPEAEDINPADLRIDTFRSSGAGGQHVTNTDSAIRI  
vc2259 KVNGDGAYGTLKFESGGHRVQRPATEAQGR IHTSACTVAVMPEIPEAEEIKASDLKIDTFRSSGAGGQHVTNTDSAIRI  
wbr31 KICCNKAYNKLKFESGGHRVQRPETESQGR IHTSCTIIVMPEMLDFKKIKTSDLRIDTFRSSGAGGQHVTNTDSAIRI  
XAC142 RVVGRGAYSRLKFESGTHRVQRPATESQGR IHTSAAATVAI IPEADDVETINPADLKVDTFRSSGAGGQHVNKTESAIRI  
XCC137 RVVGRGAYSRLKFESGTHRVQRPATESQGR IHTSAAATVAI IPEADDVEVINPADLKVDTFRSSGAGGQHVNKTESAIRI  
XF2579 RIVGRGAYSRLKFESGTHRVQRPATESQGR IHTSAAATVAI IPEADEIASINPADLKVDTFRSSGAGGQHVNKTESAIRI  
y3135 KISGDGVYGRLLKFESGGHRVQRPATESQGR IHTSACTVAVMPEIPEAEEINAGDLRIDTFRSSGAGGQHVTNTDSAIRI  
YPO104 KISGDGVYGRLLKFESGGHRVQRPETESQGR IHTSACTVAVMPEIPEAEEINAGDLRIDTFRSSGAGGQHVTNTDSAIRI  
Z0181 KISGDGVYGRLLKFESGGHRVQRPATESQGR IHTSACTVAVMPELPEAEDINPADLRIDTFRSSGAGGQHVTNTDSAIRI

b0170 THLPTGIVVECQDERSQHKNKAKALSVLGAR IHAEMAKRQQAEEASTRRNLLGSGDRSDRNR TYNFPQGRVTDHRILTLY  
Bbp214 THIPSGVVEVCQDERSQHKNKAKALSVLVSR IKAELYNQRKKNAIQRRLDGLTGMRS DRNR TYNFAQNRVTDHRILVYVY  
Bf131 THIPSGLSVVEVCQDERSQHKNKAKALS SVLKSRLYAINIKQKQEEESNVRNRLIGTGDRSDR IRTYNYFPQGRVTDHRIFTSY  
bu232 THIPTGNVVEVCQDERSQHKNKAKALS ILSARVYAAKLEKDRQESSMRKILLGTGERSDRNR TYNFPQNRITDHRILSIY  
BUsG22 THIPSGNVVEVCQDERSQHKNKAKALS ILSARVYADLAKS QKENS SMRRI LLGTGERSDRNR TYNFAQNRITDHRILTIY  
HI0914 THIPGTGIVVECQDERSQHKNKAKAMSVL ASRIVQAEQERQAAEATDMRRNLLGSGDRSDK IRTYNYFPQGRITDHRILTIY  
PA3655 THIPSGIVVECQEERSQHKNRAKAMAWLA AKLNDQQQAAAQQAIASTRKLLVGS GDRSER IRTYNYFPQGRVTDHRILTLY  
PM1985 THIPGTGIVVECQDERSQHKNKAKAMSVL ASRIVQAEKEREQQAQADTRNLLGSGDRSDK IRTYNYFPQGRVTDHRILTVY  
RSc140 THLPTGLVVEVCQDDRSQHRNKDRAMQV LAARLKDROEREQAQEA SARKSLIGSGDRSDR IRTYNYFPQGRITDHRILTLY  
STM021 THLPTGIVVECQDERSQHKNKAKALSVL GAR IHAETAKRQQAEEASTRRNLLGSGDRSDRNR TYNFPQGRVTDHRILTLY  
STY024 THLPTGIVVECQDERSQHKNKAKALSVL GAR IHAETAKRQQAEEASTRRNLLGSGDRSDRNR TYNFPQGRVTDHRILTLY  
vc2259 THLPTGIVVECQDERSQHKNKAKAMSVL LAAR IQAEEASGRAAEISDTRNLLGSGDRSDR IRTYNYFPQGRVTDHRILTVY  
wbr31 THIPTNIVVECQDERSQHKNKSKAMLV LKSRLOANLLKNKQKKEE IIRKSLGSGDRSDR IRTYNYFPQGRITDHRILTIY  
XAC142 THVPSGVVVEVCQTERSQHANRDKAMKRL KAQLLDTERSKAAAAEAQTRKLQVGS GDRSQR IRTYNYFPQGRITDHRILTLY  
XCC137 THVPSGVVVEVCQTERSQHANRDKAMKRL KAQLLVEAERSKAAAAEAQTRKLVGS GDRSQR IRTYNYFPQGRITDHRILTLY  
XF2579 THLPTGVVVEVCQTERSQHANRDKAMKRL KAQLIESERSQQAATAEAMTRKLQVGS GDRSQR IRTYNYFPQGRITDHRILTLY  
y3135 THIPGTGIVVECQDERSQHKNKAKAMSVL GAR IRAAEMQKRLQAEASERRNLLGTGDRSDRNR TYNFPQGRVTDHRILTLY  
YPO104 THIPGTGIVVECQDERSQHKNKAKAMSVL GAR IRAAEMQKRLQAEASERRNLLGTGDRSDRNR TYNFPQGRVTDHRILTLY  
Z0181 THLPTGIVVECQDERSQHKNKAKALSVL GAR IHAEMAKRQQAEEASTRRNLLGSGDRSDRNR TYNFPQGRVTDHRILTLY

b0170 RLDEVMGKLDMLIEPI IQEHQADQLAAMA VVKCKPTSPGRRHVVKV VVNP ELHKGKPFAPLLEKNSKSGGRNNGRITTR  
Bbp214 CLDEVLDGKLDVLIPI IQEHNADVLSNMA I IKCKPTSPGRRHAIKV VNP SLYKGP ISSLIRKNSKSGGRNNGRITTR  
Bf131 KLHDIMNGKLDILIQP IMCKHQATLLDQMS VIKCNP TSPGRRHVVKLVNGGLYKGP YSLLSKKVANSGRNNGRITTR  
bu232 KLDEVLQKLDLIDP I IQEYQADMLSSMA VVKCKPTSPGRRHVVKV VVNP ELHKGKPFAPLLEKNSKSGGRNNGRITTR  
BUsG22 KLNEVLQKLDLIDP IMQEYQADMLSSMA IVKCKPTSPGRRHVVKV VVNP ELHKGKPFAPLLEKNSKSGGRNNGRITTR  
HI0914 RLDEVVMNGKIDELIQP I IQEYQADQLAAMA IVKCKPTSPGRRHVVK I VNP ELHKGKPFAPLLEKNSKSGGRNNGRITTR  
PA3655 SLGVEVMGAVEQVIEPLLQEQADQLAAMA IVKCKPTSPGRRHVVKV VVNP ELHKGKPFAPLLEKNSKSGGRNNGRITTR  
PM1985 RLDEVVMNGKIDELIQP I IQEYQADQLAAMA IVKCKPTSPGRRHVVK I VNP ELHKGKPFAPLLEKNSKSGGRNNGRITTR  
RSc140 KIDALMDGDLGELLGALAAHEQAELAA MVLVKTPTSPGRRSMV VVNP DLHKGKPFAPLLEKNSKSGGRNNGRITTR  
STM021 RLDETMGKLDMLIEPI IQEHQADQLAAMA VVKCKPTSPGRRHVVKV VVNP ELHKGKPFAPLLEKNSKSGGRNNGRITTR  
STY024 RLDETMGKLDMLIEPI IQEHQADQLAAMA VVKCKPTSPGRRHVVKV VVNP ELHKGKPFAPLLEKNSKSGGRNNGRITTR  
vc2259 RLTEVMEGDMQSLIDPVI HEHQADQLAAMA IVKCKPTSPGRRHVVKV VVNP DLHKGKPFAPLLEKNSKSGGRNNGRITTR  
wbr31 KIDEVMDGNLILINP ILEKYELEK I KEMTLNKNCP TSPGRRHVTVKV VVNP ELHKGKPFAPLLEKNSKSGGRNNGRITTR  
XAC142 DLPNIIEGDLDALIGRLLHEHQADEL ARMP LMKFKPTSPGRRSAVRV VTPDLHKGKPFAPLLEKNSKSGGRNNGRITTR  
XCC137 DLPNIIEGDLDALIARLLHEHQADEL ARMP LMKFKPTSPGRRSAVRV VTPDLHKGKPFAPLLEKNSKSGGRNNGRITTR  
XF2579 DLPNIIEGDLPLIDRLRQEHQAELARV LDKFKPTSPGRRSAARV VTPDLHKGKPFAPLLEKNSKSGGRNNGRITTR  
y3135 RLDEVMEGKLDMLIQP I IQEYQADQLSAMA IVKCKPTSPGRRHVVKV VVNP ELHKGKPFAPLLEKNSKSGGRNNGRITTR  
YPO104 RLDEVMEGKLDMLIQP I IQEYQADQLSAMA IVKCKPTSPGRRHVVKV VVNP ELHKGKPFAPLLEKNSKSGGRNNGRITTR  
Z0181 RLDEVMEGKLDMLIEPI IQEHQADQLAAMA VVKCKPTSPGRRHVVKV VVNP ELHKGKPFAPLLEKNSKSGGRNNGRITTR

b0170 HIGGGHKQAYRIVDFKRNKDGIPAVVER LEYDPNRSANIALVLYKDGERRY I LAPKGLKAGDQIQSGVDAAIKPGNTLPM  
Bbp214 HIGGRHKRFYRIIDFKRNKDNIPAI VERLE YDPNRSANIALVLYKDGERRY I LASKGLMVGSKI VSGFNAEIKI GINALPM  
Bf131 HIGSGHKQRYRIIDFKRNKDDVFAVVER MEYDPNRSANIALVLYKDGERRY I LAPRNLNVGNKI IISGLNVP I SPGNSLPL  
bu232 HIGGGHKRAYRIVDFKRNKDDIGATVER FEYDPNRSANIALVLYKDGERRY I LAPKGLKAGDQIQSGVDAAIKPGNTLPM  
BUsG22 HIGGGHKRIYRIIDFKRNKDNITASIER FEYDPNRSANIALVLYKDGERRY I LAPKGLKAGDQIQSGVDAAIKPGNTLPM  
HI0914 HIGGGHKQHYRLIDFKRNKLDIPAVVER LEYDPNRSANIALVLYKDGERRY I LAPKGLSVGDQIQAGINSP I KVGNSLPM  
PA3655 HIGGGHKQHYRLVDFFRNKDGP I AVVER LEYDPNR TAHIALLYKADGERRY I IAPKGLVAGDQIQSGVDAAIKAGNSMPL  
PM1985 HIGGGHKQHYRLIDFKRNKLDIPAVVER LEYDPNR TAHIALLYKADGERRY I IAPKGLVAGDQIQSGVDAAIKAGNSMPL  
RSc140 HKGGGHHKHYRIVDFKRNKDGIPAK I ERLE YDPNRSANIALVLFADGERRY I IAPKGLVAGDQIQSGVDAAIKAGNSMPL  
STM021 HIGGGHKQAYRIVDFKRNKDGIPAVVER LEYDPNRSANIALVLYKDGERRY I LAPKGLKAGDQIQSGVDAAIKAGNTLPM  
STY024 HIGGGHKQAYRIVDFKRNKDGIPAVVER LEYDPNRSANIALVLYKDGERRY I LAPKGLKAGDQIQSGVDAAIKAGNTLPM  
vc2259 HIGGGHKQHYRLVDFKRTKDGIPAK VERLE YDPNRSANIALVLYADGERRY I IAPKGLQAGDQIQSGVDAAIKAGNAMPM  
wbr31 HIGGRHKRYRLIDFKRNKDDILAKV KRLE YDPNRSANIALVLYADGEMRY I ILEAKGLKIDKQVQSGINAP I KIGNALPI  
XAC142 HVGGGHHKHYRIIDFKRNKEGIPARVER IEYDPNR TAHIALCYVDGERRY I IAPKGLKAGDQIQAGANAP IKTGNLPL  
XCC137 HVGGGHHKQHYRIIDFKRNKEGIPARVER IEYDPNR TAHIALCYVDGERRY I IAPKGLKAGDQIQAGANAP IKTGNLPL  
XF2579 HIGGGCKQRYRVIDFKRDK EAP I PARVER IEYDPNR TAHIALCYVDGERCY I IAPKGLKEGDK IISGPNVP I KLGNSLPL  
y3135 HIGGGHKQHYRLVDFKRNKDGIPAVVER LEYDPNRSANIALVLYKDGERRY I LAPKGLKAGDQIQSGVDAAIKAGNTLPM  
YPO104 HIGGGHKQHYRLVDFKRNKDGIPAVVER LEYDPNRSANIALVLYKDGERRY I LAPKGLKAGDQIQSGVDAAIKAGNTLPM  
Z0181 HIGGGHKQAYRIVDFKRNKDGIPAVVER LEYDPNRSANIALVLYKDGERRY I LAPKGLKAGDQIQSGVDAAIKPGNTLPM

b0170 RNIPVGVSTVHNEMKPGKGGQLARSAGTYVQ I VARDGAYVTLRLRSGEMRKVEADCRATLGEVGNAEHMLRVLGKAGAAAR  
Bbp214 KNIPIGTVIHNVIEIKPGKGGQIARSAGTYVQ I SRENSYVTLRLRSGEMRKVEADCRATLGEVGNSEHMLRVLGKAGASR  
Bf131 SNIIPVGS I IHNEMKVGKGGQLARSAGTYVQ I VSRDGEYI I LRLRSGEIRKVRCECRATLGEVGNSEHMLRALGKAGASR  
bu232 KNIPVGTFFVHNVELKPGKGGQIARSAGSYVQLVAFDEEYATLRLRSGEMRKTSNCRATLGEVGNSEHMLKVLGKAGASR  
BUsG22 KNIPVGSFIHNEMVRPVGKGGQIARSAGSYVQLVADK EYATLRLRSGEMRKTSNCRATLGEVGNSEHMLKVLGKAGASR  
HI0914 RNIPVGVSTVHNVELKPGKGGQIARSAGTYVQ I IAREGNYVTLRLRSGEMRKVLAECVATLGEVGNSEHMLRVLGKAGANR  
PA3655 RNIPVGVSTVHGIELKPGKGAQ IARSAGASQLVAREGAYVTLRLRSGEMRKVLAECRATLGEVGNSEHMLRVLGKAGATR  
PM1985 RNIPVGVSTVHNVELKPGKGGQIARSAGTYVQ I IAREGNYVTLRLRSGEMRKVLAECVATLGEVGNSEHMLRVLGKAGANR  
RSc140 RNIPVGTTHIHCVEILKPGKGAQ IARSAGTYVQ I IAREGNYVTLRLRSGEMRKVLAECVATLGEVGNSEHMLRVLGKAGATR  
STM021 RNIPVGVSTVHNEMKPGKGGQLARSAGTYVQ I VARDGAYVTLRLRSGEMRKVEADCRATLGEVGNAEHMLRVLGKAGAAAR  
STY024 RNIPVGVSTVHNEMKPGKGGQLARSAGTYVQ I VARDGAYVTLRLRSGEMRKVEADCRATLGEVGNAEHMLRVLGKAGAAAR  
vc2259 RNIPVGVSTIHNVELKPGKGAQ IARSAGTYVQ I IAREGNYVTLRLRSGEMRKVLAECVATLGEVGNSEHMLRVLGKAGAAAR  
wbr31 KMFPFGSILHNI EIKPGKGGQ IARSAGSYAVVTHEKNYV I VKLRSGEIRK I FSECKATFGEVGNSEYMLKSLGKAGANR  
XAC142 RNIPVGTTHVHGIELKPGKGAQ IARSAGASQLVAREG IYATLRLRSGEMRKVPVECRATLGEVGNSEHMLRVLGKAGAKR  
XCC137 RNIPVGTTHVHGIELKPGKGAQ IARSAGASQLVAREG IYATLRLRSGEMRKVPVECRATLGEVGNSEHMLRVLGKAGAKR  
XF2579 RNIPVGTTHVHVELKPSKGAQMARSAGSSVQLVAREG IYATLRLRSGEMRRVLAECRATLGEVGNSEHMLRVLGKAGAKR

y3135 RNIPVSGSTVHNEMKPGKGGQLARSAGAYVQIVARDGSYVTLRLRSSEMRRKQVADCRATLGEVGNAEHMLRVLGKAGASR  
YP0104 RNIPVSGSTVHNEMKPGKGGQLARSAGAYVQIVARDGSYVTLRLRSSEMRRKQVADCRATLGEVGNAEHMLRVLGKAGASR  
Z0181 RNIPVSGSTVHNEMKPGKGGQLARSAGAYVQIVARDGSYVTLRLRSSEMRRKQVADCRATLGEVGNAEHMLRVLGKAGAA

b0170 WRGVRPTVRGTAMNPDHHPGGGEGRHPVTPWGVQTKGKKTRSNKRTRDKFIVRRRGLVGGKVGMRIFFTEDGVSIPVTVI  
BBp214 WRGIRPTVRGTAMNPDHHPGGGEGRHPVSPWGLQTKGKKTRKNKRTEKFIIRHRGLIGQKLGMRIFTEEGTVYPTVIT  
Bf131 WRGIRPTVRGTAMNPDHHPGGGEGRHPVSPWGVQTKGKKTRSNKRTRDKFILCRRGLVGRKLGMRIFINEEGIMIAVTMI  
bu232 WIGIRPTVRGTAMNPDHHPGGGEGRHPVTPWGIQTKGKKTRKNKRTRDKFILRHRGLVGGKIGMTRIFTEEGTSPVTVI  
BUsG22 WIGIRPTVRGTAMNPDHHPGGGEGRHPVTPWGLQTKGKKTRKNKRTEKFIIRHRGLVGGKLGMSRIFTEEGSSIPITVI  
HI0914 WRGIRPTVRGTAMNPDHHPGGGEGRHPVTPWGVQTKGKKTRSNKRTRDKYIVRRRGLVGRKVGMRIFNEDGVSVPVTVI  
PA3655 WRGVRPTVRGTAMNPDHHPGGGEGRHPVSPWGLQTKGKKTRSNKRTRDKFIVRRRGLVGRKCGMTRIFTEEGVSPVTVI  
PM1985 WRGIRPTVRGTAMNPDHHPGGGEGRHPVTPWGVQTKGKKTRSNKRTRDKFIVRRRGLVGRKVGMRIFNEDGVSIPVTVI  
RSc140 WRGIRPTVRGTAMNPDHHPGGGEGRHPVTPWGVQTKGKKTRSNKRTRDKFIVRRRGLVGRKVGMRIFNEDGVSIPVTVI  
STM021 WRGVRPTVRGTAMNPDHHPGGGEGRHPVTPWGVQTKGKKTRSNKRTRDKFIVRRRGLVGGKVGMRIFTEEGVSPVTVI  
STY024 WRGVRPTVRGTAMNPDHHPGGGEGRHPVTPWGVQTKGKKTRSNKRTRDKFIVRRRGLVGGKVGMRIFTEEGVSPVTVI  
vc2259 WRGVRPTVRGTAMNPDHHPGGGEGRHPVTPWGVQTKGKKTRSNKRTRDKYIVRRRGLVGRKVGMRIFNEDGVSIPVTVI  
wbr31 WRGIRPTVRGTAMNPDHHPGGGEGRHPVSPWGVQTKGKKTRSNKRTRDKFILRHRGLVGGKIGMTRIFNEDGVSIPVTVI  
XAC142 WRGVRPTVRGTAMNPDHHPGGGEGRHPVTPWGVQTKGKKTRSNKRTRDKFIVRRRGLVGGKVGMRIFTEEGVSPVTVI  
XCC137 WRGVRPTVRGTAMNPDHHPGGGEGRHPVTPWGVQTKGKKTRSNKRTRDKFIVRRRGLVGRKVGMRIFNEDGVSIPVTVI  
XF2579 WIGVRPTVRGTAMNPDHHPGGGEGRHPVTPWGVQTKGKKTRSNKRTRDKFIVRRRGLVGGKVGMRIFTEEGVSPVTVI  
y3135 WRGIRPTVRGTAMNPDHHPGGGEGRHPVTPWGVQTKGKKTRSNKRTRDKFIVRRRGLVGGKVGMRIFTEEGVSPVTVI  
YP0104 WRGIRPTVRGTAMNPDHHPGGGEGRHPVTPWGVQTKGKKTRSNKRTRDKFIVRRRGLVGGKVGMRIFTEEGVSPVTVI  
Z0181 WRGVRPTVRGTAMNPDHHPGGGEGRHPVTPWGVQTKGKKTRSNKRTRDKFIVRRRGLVGGKVGMRIFTEEGVSPVTVI

b0170 EVEANRVTQVKDLANDGYRAIQVTTGAKKANRVTKPEAGHFPAKAGVEAGRGLWEFFTVGQSI SVELFADVKKVDVTGTSK  
BBp214 KVKENRITQIKTISRDLYHAVQVTTGIIKSNKLLKPEIGHFLKSGVKIGKGLWEFFKIGQSLNLELFSNIIKWDIIGTTSK  
Bf131 EILPHYVTVQVKNKEKDGCAVQVTTGNTRDKCLNPKLGLHKLKLGINGYKGLWEFISVGDIFTLKVLKCKINKVDVTGISK  
bu232 ELKENRITQVKNINNTDLYCAIQVTTGIIKSNKLLKPEIGHFLKSGVKIGKGLWEFFKIGQSIININIFNNKVDITGTSK  
BUsG22 QIQENRITQIRNIIKTDKYAIAQVTTGLKLNKLLKPEIGHFLKSGVKIGKGLWEFFKIGQSIININIFNNKVDITGTSK  
HI0914 EIEANRVTQVKTLENDGYTAVQVTTGSKKANRVTKPEAGHFPAKAGVEAGRGLWEFFTLGQEI SVELFADVKKVDVTGTSK  
PA3655 EVEANRVTQVKTEETDGYRAVQVTTGERRASRVTKAQAGHPAKANVAAGRWVWFYAAGDQITVDLQAGQVMDVTGTSK  
PM1985 EIEANRVTQVKTEETDGYSAIQVTTGSKKANRVTKPEAGHFPAKAGVEAGRGLWEFFTLGQEI SVELFADVKKVDVTGTSK  
RSc140 EVGGNRVTQIKTDETDGYTAVQVTTGTRRASRVTKPLAGHLAKAGVEAGEIIVEFLKLGDTIDVDLFSVDQKIDVQGTI  
STM021 EVEANRVTQVKDLANDGYRAVQVTTGAKKANRVTKPEAGHFPAKAGVEAGRGLWEFFTVGQSI SVELFADVKKVDVTGTSK  
STY024 EVEANRVTQVKDLANDGYRAVQVTTGAKKANRVTKPEAGHFPAKAGVEAGRGLWEFFTVGQSI SVELFADVKKVDVTGTSK  
vc2259 EVEANRVSQVKTLETDGYAAIQVTTGSKKANRVTKPEAGHFPAKAGVEAGRGLWEFFAVGSELTVELFNEVKKVDVTGTSK  
wbr31 KISDNKIQVKKIKKIKEDGYSSIQVTTGKVKFRRENKSIIGHFKKNKVELGRGLWEFFYVGGVLSINTPINKVNTGTSK  
XAC142 QATPNRIAQIKTVEVDGYSAVQVTTGARRAALVNKPAAGHPAKAKVEAGRGLWEFFAVGGEIKADIFEVGQKVDVQGVTK  
XCC137 EATPNRIAQIKTVEVDGYSAVQVTTGARRAALVNKPAAGHPAKAKVEAGRGLWEFFAVGGEIKADIFEVGQKVDVQGVTK  
XF2579 EATANRVVQIKTSDVDGYDAVQVTTGARRAALVNKPAAGHPAKAKVEAGRGLWEFFYVGGVLSINTPINKVNTGTSK  
y3135 EIEANRVTQVKSLENDGYRAVQVTTGAKKANRVTKPEAGHFPAKAGVEAGRGLWEFFTAGQEI SVELFADVKKVDVTGTSK  
YP0104 EIEANRVTQVKSLENDGYRAVQVTTGAKKANRVTKPEAGHFPAKAGVEAGRGLWEFFTAGQEI SVELFADVKKVDVTGTSK  
Z0181 EVEANRVTQVKDLANDGYRAIQVTTGAKKANRVTKPEAGHFPAKAGVEAGRGLWEFFTVGQSI SVELFADVKKVDVTGTSK

b0170 GKGFAGTVKRWNFRQDATHGNSLSHRVPGSIGQNQTPGKVFKGKMGAGQMGNERVTVQSLDVRVDAERNLLLKVGAVP  
BBp214 GKGFAGTVKRWNFRQDATHGNSLSHRVPGSIGQNQTPGKVFKGKMGAGHGNRVTVQNLNIVKIDLNQEIILVKGAVP  
Bf131 GKGFAGTVKRWNFRQDATHGNSLSHRVPGSIGQNQTPGKVFKGKMGAGHGNRVTVQNLNIVKIDLNQEIILVKGAVP  
bu232 GKGFAGTVKRWNFRQDATHGNSLSHRVPGSIGQNQTPGKVFKGKMGAGHGNRVTVQNLNIVKIDLNQEIILVKGAVP  
BUsG22 GKGFAGTVKRWNFRQDATHGNSLSHRVPGSIGQNQTPGKVFKGKMGAGHGNRVTVQNLNIVKIDLNQEIILVKGAVP  
HI0914 GKGFAGTVKRWNFRQDATHGNSLSHRVPGSIGQNQTPGKVFKGKMGAGHGNRVTVQNLNIVKIDLNQEIILVKGAVP  
PA3655 GKGFAGTVKRWNFRQDATHGNSLSHRVPGSIGQNQTPGKVFKGKMGAGHGNRVTVQNLNIVKIDLNQEIILVKGAVP  
PM1985 GKGFAGTVKRWNFRQDATHGNSLSHRVPGSIGQNQTPGKVFKGKMGAGHGNRVTVQNLNIVKIDLNQEIILVKGAVP  
RSc140 GKGFAGTVKRWNFRQDATHGNSLSHRVPGSIGQNQTPGKVFKGKMGAGHGNRVTVQNLNIVKIDLNQEIILVKGAVP  
STM021 GKGFAGTVKRWNFRQDATHGNSLSHRVPGSIGQNQTPGKVFKGKMGAGHGNRVTVQNLNIVKIDLNQEIILVKGAVP  
STY024 GKGFAGTVKRWNFRQDATHGNSLSHRVPGSIGQNQTPGKVFKGKMGAGHGNRVTVQNLNIVKIDLNQEIILVKGAVP  
vc2259 GKGFAGTVKRWNFRQDATHGNSLSHRVPGSIGQNQTPGKVFKGKMGAGHGNRVTVQNLNIVKIDLNQEIILVKGAVP  
wbr31 GKGFAGTVKRWNFRQDATHGNSLSHRVPGSIGQNQTPGKVFKGKMGAGHGNRVTVQNLNIVKIDLNQEIILVKGAVP  
XAC142 GKGFAGTVKRWNFRQDATHGNSLSHRVPGSIGQNQTPGKVFKGKMGAGHGNRVTVQNLNIVKIDLNQEIILVKGAVP  
XCC137 GKGFAGTVKRWNFRQDATHGNSLSHRVPGSIGQNQTPGKVFKGKMGAGHGNRVTVQNLNIVKIDLNQEIILVKGAVP  
XF2579 GKGFAGTVKRWNFRQDATHGNSLSHRVPGSIGQNQTPGKVFKGKMGAGHGNRVTVQNLNIVKIDLNQEIILVKGAVP  
y3135 GKGFAGTVKRWNFRQDATHGNSLSHRVPGSIGQNQTPGKVFKGKMGAGHGNRVTVQNLNIVKIDLNQEIILVKGAVP  
YP0104 GKGFAGTVKRWNFRQDATHGNSLSHRVPGSIGQNQTPGKVFKGKMGAGHGNRVTVQNLNIVKIDLNQEIILVKGAVP  
Z0181 GKGFAGTVKRWNFRQDATHGNSLSHRVPGSIGQNQTPGKVFKGKMGAGHGNRVTVQNLNIVKIDLNQEIILVKGAVP

b0170 GATGSDLIVKPAVMELVLALTVSETTFGRDFNEALVHQVVVYAAAGARQGTQAQKTRAEVTSKPKPWRQKGTARSGSIK  
BBp214 GYSGNIIIIKPAIMELVVLNVSDFTFGRDFNEALVHQVVIISYSSSIRQGTQAQKTRAEVTSKPKPWRQKGTARVGSIR  
Bf131 GVI GENVIKRSVMKQLNLSVSDKVFYGFPPNPAIHQIVSSYLINCRQGSKSQKSRSDVSGSNKPKPWRQKGTARSGSVK  
bu232 GATGSDLIVKPAIMELVVLNVSDFTFGRDFNEALVHQVVIISYSSSIRQGTQAQKTRAEVTSKPKPWRQKGTARSGSVK  
BUsG22 GPTGSDLIVKPAIMELVILLVSEIIFGRDFNEALVHQVVVYAAAGARQGTQAQKTRAEVTSKPKPWRQKGTARSGSVK  
HI0914 GAINGDVIKPAVMELVLALTVSETTFGRDFNEALVHQVVVYAAAGARQGTQAQKTRAEVTSKPKPWRQKGTARSGSVK  
PA3655 GATGSDLIVKPAIMELVVLNVSDFTFGRDFNEALVHQVVIISYSSSIRQGTQAQKTRAEVTSKPKPWRQKGTARSGSVK  
PM1985 GATGSDLIVKPAIMELVVLNVSDFTFGRDFNEALVHQVVIISYSSSIRQGTQAQKTRAEVTSKPKPWRQKGTARSGSVK  
RSc140 GATGSDLIVKPAIMELVVLNVSDFTFGRDFNEALVHQVVIISYSSSIRQGTQAQKTRAEVTSKPKPWRQKGTARSGSVK  
STM021 GATGSDLIVKPAIMELVVLNVSDFTFGRDFNEALVHQVVIISYSSSIRQGTQAQKTRAEVTSKPKPWRQKGTARSGSVK  
STY024 GATGSDLIVKPAIMELVVLNVSDFTFGRDFNEALVHQVVIISYSSSIRQGTQAQKTRAEVTSKPKPWRQKGTARSGSVK  
vc2259 GATGSDLIVKPAIMELVVLNVSDFTFGRDFNEALVHQVVIISYSSSIRQGTQAQKTRAEVTSKPKPWRQKGTARSGSVK  
wbr31 GATGSDLIVKPAIMELVVLNVSDFTFGRDFNEALVHQVVIISYSSSIRQGTQAQKTRAEVTSKPKPWRQKGTARSGSVK  
XAC142 GATGSDLIVKPAIMELVVLNVSDFTFGRDFNEALVHQVVIISYSSSIRQGTQAQKTRAEVTSKPKPWRQKGTARSGSVK  
XCC137 GATGSDLIVKPAIMELVVLNVSDFTFGRDFNEALVHQVVIISYSSSIRQGTQAQKTRAEVTSKPKPWRQKGTARSGSVK  
XF2579 GATGSDLIVKPAIMELVVLNVSDFTFGRDFNEALVHQVVIISYSSSIRQGTQAQKTRAEVTSKPKPWRQKGTARSGSVK  
y3135 GATGSDLIVKPAIMELVVLNVSDFTFGRDFNEALVHQVVIISYSSSIRQGTQAQKTRAEVTSKPKPWRQKGTARSGSVK  
YP0104 GATGSDLIVKPAIMELVVLNVSDFTFGRDFNEALVHQVVIISYSSSIRQGTQAQKTRAEVTSKPKPWRQKGTARSGSVK  
Z0181 GATGSDLIVKPAIMELVVLNVSDFTFGRDFNEALVHQVVIISYSSSIRQGTQAQKTRAEVTSKPKPWRQKGTARSGSVK

b0170 SPIWRSGGVTFARQDHSQKVNKKMYRGALKSILSELVRQDRLIVVEKFSVEAPKTKLLAQKLDKMALEDVLIITELDEN  
BBp214 SPLWRSGGVTFARQDHSQKVNKKMYRGALKSILSELVRQDRLIVVEKFSVEAPKTKLLAQKLDKMALEDVLIITELDEN  
Bf131 SPIWRSGGVTFARQDHSQKVNKKMYRGALKSILSELVRQDRLIVVEKFSVEAPKTKLLAQKLDKMALEDVLIITELDEN

bu232 SPIWRSGGVTFAAKQHSQKVNKKMYRGALKSIFSELIRQKRLIVFENFSLDAPKTKLLVQKLDINLKNVLIIVTKIDNN  
BUsg22 SPIWRSGGVTFASKQSHSQKINKKMYRGALKSIFSELIRQKRLIIIEFKFSLDLPKTNLLVKKLKEIKLNNVLIITEIENN  
HI0914 SPIWRSGGTTFAAKQDHSQKVNKKMYRGAIKSILSELVQRDLVVVEKFFELDAPKTKVLVQKLDLAVEDALIITSLDEN  
PA3655 SPIWRGGGTTFAAKRSHEQKLNKKMYRAALRSILAEVLRLDRLVVADFAVDAPKTKGLVAKLDTLGLKDLVITVGDEN  
PM1985 SPIWRSGGVTFAAKQDHSQKVNKKMYRGAIKSILSELVQRDLIVVEKFFVEAPKTKVLLQKLELALEDVLIITSLDEN  
RSc140 SPLWRGGGRIFPNSENFQKVNKKMYRAGMRSIYQLAREGRINVVDSLSVDAPKTKLLADKFRAMGLDSVLVITNLDEN  
STM021 SPIWRSGGVTFAAKQDHSQKVNKKMYRGALKSILSELVQRDLIVVEKFFVEAPKTKLLAQKLDMALEDVLIITELDEN  
STY024 SPIWRSGGVTFAAKQDHSQKVNKKMYRGAIKSILSELVQRDLIVVEKFFVEAPKTKLLAQKLDMALEDVLIITELDEN  
vc2259 SPIWRSGGVTFAAKQDHSQKVNKKMYRGAIKSILSELVQRDLIVVEKFFVEAPKTKLLAQKLDMALEDVLIITELDEN  
wbr31 SPIWRSGGVTFAAKQDHSQKVNKKMYRGAIKSILSELVQRDLIVVEKFFVEAPKTKLLAQKLDMALEDVLIITELDEN  
XAC142 APIFVGGGVTFAAKRSFEQKVNKKMYRAAICAFSELNRQGRLLMI VDAFDLEATKTKGLIEKLGKLEGRPLIVTEASEH  
XCC137 APIFVGGGVTFAAKRSFEQKVNKKMYRAAICAFSELNRQGRLLMI VDSFDIEATKTKGLIEKLGKMGDKRPLIVTEASEH  
XF2579 APIFVGGGVFAAKRSFSQKVNKKMYRGAIKSILSELNRQGRLLMI VDAFDVEVSKTKVFAEKIKSLEGRSLIVSGISEC  
Y3135 SPIWRSGGVTFAAKQDHSQKVNKKMYRGAIKSILSELVQRDLIIIEKFFVEAPKTKLLAQKLDMALEDVLIITELDEN  
YPO104 SPIWRSGGVTFAAKQDHSQKVNKKMYRGAIKSILSELVQRDLIIIEKFFVEAPKTKLLAQKLDMALEDVLIITELDEN  
Z0181 SPIWRSGGVTFAAKQDHSQKVNKKMYRGAIKSILSELVQRDLIIIEKFFVEAPKTKLLAQKLDMALEDVLIITELDEN

b0170 LFLAARNLHKVDVRDATGIDPVSLIAFDKVVMTADAVKQVEEMLAALHLDYKDEVVKKLMTFNFYNSVMQVPRVEKITL  
BBp214 LKLASRNLYKVDVQTVNHNMPRLSISFNHVLITSKAIQKVEELLTVALYDYKNSISKKLMNFNYSSVMQVPKIDKITL  
Bf131 LILASSNLHTVIYNLNSIDPVSLINFNITLFRITVESLELRLSACLRLDYKSHVYDLMREFFKYKSVMPRIEIKITI  
bu232 LFLASRNLYSVDVVDVHSDIDPVSLIAFDHVVITVEAVKRIEELSATLYDYKSKVITQLMHELNYSSVMQVPKIDKITL  
BUsg22 LFLASRNLYSVDVVDVCSMDPVSLIAFEHIIITVAALKKVEEMLSSTFFDYDYKSKVVKKLMELNYSSIMQVPKIDKITL  
HI0914 LFLAARNLYKVDVDRVQGDIDPVSLIAFDKVVMTADAVKQIEELLAALHLDYKDEVVKKLMTFNFYNSVMQVPRIEIKITL  
PA3655 LYLAARNLAHVDRVQGSIDPVSLIAFDKVVMTADAVKQIEELLAALHLDYKDEVVKKLMTFNFYNSVMQVPRIEIKITL  
PM1985 LFLAARNLYKVDVDRVQGDIDPVSLIAFDKVVMTADAVKQIEELLAALHLDYKDEVVKKLMTFNFYNSVMQVPRIEIKITL  
RSc140 LFLASRNLAHVLVVEPRHADPLSLVHYKVVLTAAVAQIEELKARLQEFYKKEVVAELIKQFGYKSVMEPRITKITL  
STM021 LFLAARNLHKVDVRDATGIDPVSLIAFDKVVMTADAVKQVEEMLAALHLDYKDEVVKKLMTFNFYNSVMQVPRVEKITL  
STY024 LFLAARNLHKVDVRDATGIDPVSLIAFDKVVMTADAVKQVEEMLAALHLDYKDEVVKKLMTFNFYNSVMQVPRVEKITL  
vc2259 LFLAARNLYKVDVDRVQGDIDPVSLIAFDKVVMTADAVKQVEEMLAALHLDYKDEVVKKLMTFNFYNSVMQVPRIEIKITL  
wbr31 LVLSSRNLNKVVHVCFFININP INLISFKKTIITIDAIIIEELTMQLYDFYKKNVLIKLNKFNYSIMQVPKIEKITL  
XAC142 LYLSARNLPYVQVRDVQGLDPVALVGADTVITADAVKVEEWLARTLEKFKYKDNVVPALMKEFGYTNPMEVPKLVKVTL  
XCC137 LYLSARNLPYVQVRDVQGLDPVALVGADTVITADAVKVEEWLARTLEKFKYKDNVVPALMKEFGYTNPMEVPKLVKVTL  
XF2579 LLSLRNLPVQVRDVQGLDPVALVGADTVITADAVKVEEWLARTLEKFKYKDNVVPALMKEFGYTNPMEVPKLVKVTL  
Y3135 LFLAARNLYKVDVDRVQGDIDPVSLIAFDKVVMTADAVKQVEEMLAALHLDYKDEVVKKLMTFNFYNSVMQVPRVEKITL  
YPO104 LFLAARNLYKVDVDRVQGDIDPVSLIAFDKVVMTADAVKQVEEMLAALHLDYKDEVVKKLMTFNFYNSVMQVPRVEKITL  
Z0181 LFLAARNLHKVDVRDATGIDPVSLIAFDKVVMTADAVKQVEEMLAALHLDYKDEVVKKLMTFNFYNSVMQVPRVEKITL

b0170 NMGVGEAIADKLLDAAADLAAISGQKPLITKARKSVAGFKIRQGYPIGCKVTLRGERMWEFFERLITIAVPRIRDFRG  
BBp214 NIGVGIATIDKKNLDFAIISDLTKISGQKPLITKARKSIASFIRKQGYPIGCKVTLRGNRQWDFFERLIFIVIPRIRDFRG  
Bf131 SMGVGKSIINKKFLERAIIDLEMISGQKPVITKARKSIASFIRKQGYPIGCKVTLRGNRQWDFFERLISIAIPRIRDFRG  
bu232 NMGVGAASDKKILDNAILDLTAAISGQKPLITKARKSVAGFKIRQGYPIGCKVTLRGRQKWHFFERLITIAVPRIRDFRG  
BUsg22 NMGVGAASDKKVLDNAVLDLTAISGQKPLITKARKSVAGFKIRQGYPIGCKVTLRGRQKWHFFERLITIAVPRIRDFRG  
HI0914 NMGVGEALTDKLLDNAVADLAAISGQKPLITKARKSVAGFKIRQGYPIGCKVTLRGERMWEFFERLITIAVPRIRDFRG

PA3655 NMGLGEAVGDKKIIENAVADLEKITGQKPVVYARKSIAGFKIREGWPIGVKVTLRSDRMYEFLDRLLSISLPRVRDFRG  
PM1985 NMGVGEALTDKLLDNAVADLAAISGQKPLITKARKSVAGFKIRQGYPIGCKVTLRGERMWEFFERLITIAVPRIRDFRG  
RSc140 NMGLGEAVNDKVIIEHATGDLTKIAGQKPVVTKARKAIAGFKIRQGYPIGTMVTLRQORMYEFLLRITVSLPRVRDFRG  
STM021 NMGVGEAIADKLLDAAADLTAISGQKPLITKARKSVAGFKIRQGYPIGCKVTLRGERMWEFFERLITIAVPRIRDFRG  
STY024 NMGVGEAIADKLLDAAADLTAISGQKPLITKARKSVAGFKIRQGYPIGCKVTLRGERMWEFFERLITIAVPRIRDFRG  
vc2259 NMGVGEAINDKKLENAASDMAIISGQKPLITKARKSVAGFKIRQGYPIGCKVTLRGERMWFLLRILISLPRVRDFRG  
wbr31 NMGVGEAIADKLLDAAADLTAISGQKPLITKARKSVAGFKIRQGYPIGCKVTLRGERMWFLLRILISLPRVRDFRG  
XAC142 NMGVGEAATNKKILENAVADMAKISGQKPVVTKSRVSVASFIRKQGYPIGCKVTLRRAKMYEFLDRLLINISLPRVRDFRG  
XCC137 NMGVGEAATNKKILENAVADMSKISGQKPVVTKSRVSVASFIRKQGYPIGCKVTLRRAKMYEFLDRLLINISLPRVRDFRG  
XF2579 NMGVGEAATNKKVLENAVADMAKISGQKPVVTKSRVSVASFIRKQGYPIGCKVTLRRAKMYEFLDRLLINISLPRVRDFRG  
Y3135 NMGVGEAIADKLLDAAADLAAISGQKPLITKARKSVAGFKIRQGYPIGCKVTLRGERMWEFFERLITIAVPRIRDFRG  
YPO104 NMGVGEAIADKLLDAAADLAAISGQKPLITKARKSVAGFKIRQGYPIGCKVTLRGERMWEFFERLITIAVPRIRDFRG  
Z0181 NMGVGEAIADKLLDAAADLAAISGQKPLITKARKSVAGFKIRQGYPIGCKVTLRGERMWEFFERLITIAVPRIRDFRG

b0170 LSAKSFDRGNYSMGVREQIIFPEIDYDKVDRVRGLDITITTTAKSDEEGRALLAADFPPFRMSRVKAPVVVPAGVDVKI  
BBp214 FSNKSFDRGNYSIGIKEQIIFPEIDFDKIDRIRGINITITTTALSDREGYALLSAFNFPFRMSRIKQPIVIPSVDVITL  
Bf131 LSIKSFDRGNYSMTGIREQIIFPEINYDITDGRGMINITITTTNAVSDKEAYVLLRAFRFLKMEQIKSIIICIPNEIQITL  
bu232 LSHSFDGQGNYSGLIREQIIFPEIDYDKVDRVRGLDITITTTAKSDEEGRALLAADFPPFRMSRVKAPVVVPAGVDVKI  
BUsg22 LSTNSFDGKGNYSGLIREQIIFPEIDYDKVDRVRGLDITITTTANSDEHEARLLSSFNFPFRMSRVKRPILIPGKIKIEL  
HI0914 LSAKSFDRGNYSMGVREQIIFPEIDYDKVDRVRGLDITITTTAKNDEEGQALLAADFPPFRMSRVKAPVNIIPAGVEVKL  
PA3655 LNAKSFDRGNYSMGVKEQIIFPEIDYDKIDALRGLDITITTTARTDDEGRALLRAFKFPFRMSRVKPNVPLPAGVEIKL  
PM1985 LSAKSFDRGNYSMGVREQIIFPEIDYDKVDRVRGLDITITTTAKSDEEGQALLAADFPPFRMSRVKAPVSIIPAGVEVKL  
RSc140 VSGRAFDRGNYSNIIVGKEQIIFPEIDYDKIDALRGLNISIITTTAKSDEEAKALLAADFPPFRMSRVKAPIALPKGAEVNF  
STM021 LSAKSFDRGNYSMGVREQIIFPEIDYDKVDRVRGLDITITTTAKSDEEGRALLAADFPPFRMSRVKAPVVVPAGVDVKI  
STY024 LSAKSFDRGNYSMGVREQIIFPEIDYDKVDRVRGLDITITTTAKSDEEGRALLAADFPPFRMSRVKAPVVVPAGVDVKI  
vc2259 VNGKSFDRGNYSMGVREQIIFPEIDYDKVDRVRGLDITITTTAGTDEEGRALLAADFPPFRMSRVKAPVNIIPAGVEVKL  
wbr31 LPVKSFDGKGNYSGLIREQIIFPEIDYDKIDALRGLDITITTTAKSDEEAKALLAADFPPFRMSRVKAPVNIIPAGVEVKL  
XAC142 VSGRSFDRGNYSMGVKEQIIFPEIDFVDAVDAIRGMDIAITTTAKTDAEAKALLAADFPPFRMSRVKPVSLPKGVELNV  
XCC137 VSGRSFDRGNYSMGVKEQIIFPEIDFVDAVDAIRGMDIAITTTAKTDAEAKALLAADFPPFRMSRVKPVSLPKGVELNV  
XF2579 IPPRSFDRGNYSMGVREQIIFPEIDFVDAVDAIRGMDIAITTTANSDAEAKALLADAFNFPFRMSRVKPVSLPKGVEVSV  
Y3135 LSAKSFDRGNYSMGVREQIIFPEIDYDKVDRVRGLDITITTTAKSDEEGRALLAADFPPFRMSRVKAPVNIIPAGVEVKL  
YPO104 LSAKSFDRGNYSMGVREQIIFPEIDYDKVDRVRGLDITITTTAKSDEEGRALLAADFPPFRMSRVKAPVNIIPAGVEVKL  
Z0181 LSAKSFDRGNYSMGVREQIIFPEIDYDKVDRVRGLDITITTTAKSDEEGRALLAADFPPFRMSRVKAPVVVPAGVDVKI

b0170 NGQVITIKGKNGELTRTLNDAVEVVKHADNTLTFGPRAQAGTARALLNSMIVGTEGFTKKLQLVGVGYRAAVKGNVNL  
BBp214 IQGMVIVKGSKGLKRLIHDVSVLKVSKSCLVFSRAQAGTARALLNSMIVGTEGFTKKLQLVGVGYRISINSKNLMS  
Bf131 QDCCILVGVGLGNLSYKFNHFGVQFVSNVKNLIVYSALLGTTCSLINSMIVGTEGFTKKLQLVGVGYRISINSKNLMS  
bu232 DLQDISIKGYGHLRSITIHQSVKIEFLNNQITFSRAQAGTARALLNSMIVGSEKFKKLLQVGVGYRISITDNIINMS  
BUsg22 DLQDISIKGYGHLRSITIHDAVKVECLNNQITFSRAQAGTARALLNSMIVGSKKFKKLLQVGVGYRISITDNIINMS  
HI0914 DGQLLTVKGNKNGELSRKIHESVEVKQDNGQFTTTPRAQSGTARALLVAMVIGVTEGFTKKLQLVGVGYRAQLKGNALALS  
PA3655 AGQQLSIKGAKGALEKLVHPSVEVIQDSGELRFAARAMAGTTRALVNNMVGVSQGFERKLLQVGVGYRAQAKQVLSLS  
PM1985 DGQLLTVKGNKNGELSRITHNAVEVKQDNNELTFSRAQAGTARALLVAMVIGVTEGFTKKLQLVGVGYRAQAKQVLSLS  
RSc140 AGGLLTVKGPLGTLTQAIHNLVKKVIDNGTITFSPAALQGTMRALVANMVKGVTTGFERKLLTVGVGYRASLQGAALKLQ

STM021 NGQVITIKGKNGELTRTLNDAVEVKHADNALTFFGPRAQAGTARALLNSMVI GVTEGFTKKLQLVGVGYRAAVKGNVNLS  
STY024 NGQVITIKGKNGELTRTLNDAVEVKHADNALTFFGPRAQAGTARALLNSMVI GVTEGFTKKLQLVGVGYRAAVKGNVNLS  
vc2259 NGQEITIKGAKGELTRVFNHNGVIAQEDNQLTFGPRAQAGTARALVKNMVGVTGEGFTKKLVKGVGYRAAMKGNVGLT  
wbr31 LKKNIIIGQYGEINQLINKNINIKVNNNNIIISFPFAIAGTMRSIINNMIIGVTKKFTKKLIITGVGYRANISQKVLIMS  
XAC142 QPGLVSVKPKGKTLTLQPKPAGVEIAIDGGVATLSANALGTVRAILANMIIKGVSEGFERKLELVGVGYRAAMQKGDLSLA  
XCC137 QPELISVKGPKGTLTLQPKPAGVEIAIDGGVATLSANALGTVRAILANMIIKGVSEGFERKLELVGVGYRAAMQKGDLSLA  
XF2579 RSDMLTVKGVKGLTFPKSDNVNVVVDGDLTLTSLANSAGTTRAILNSMIKGVSI GFERKLELVGVGYRASMGENLNS  
y3135 NGQVISIKGKNGELTRTVHSAVEVKQEENTLTFAPRAQAGTTRALLNSMVI GVTEGFTKKLQLVGVGYRAAVKGNVNLA  
YPO104 NGQVISIKGKNGELTRTVHSAVEVKQEENTLTFAPRAQAGTTRALLNSMVI GVTEGFTKKLQLVGVGYRAAVKGNVNLA  
Z0181 NGQVITIKGKNGELTRTLNDAVEVKHADNALTFFGPRAQAGTARALLNSMVI GVTEGFTKKLQLVGVGYRAAVKGNVNLS

b0170 LGFSPVDHQLPAGITAECTQTEIVLKGADKQVIGQVAADLRAYRRPEPYKKGKGVRYADEVVRTKEAKKMVILLDKVA  
Bbp214 LGYSHIIEYVLPFGIFVESISQAEIIVKGINQLVGVQAANLRAYRKSEPYKKGKIRYSNEIVRVKEAKMQIILLEKLD  
Bf131 VGFSDIRYTLPIEVKAQCVNQTEIVLTSINKQLIGQVAADLRRAIKPEPEPKGKIRYFDELVYNKDTKKMQVILLDSID  
bu232 LGYSHIITYHLPGKINAENLSPTEIIOGIDKQLVGGIAANLRSYRTPPEPYKKGKIRYSNEVVRIEAKKMEVILLSKIK  
BUsG22 LGYSHPIVYSLPPYIEAENSPTEIIVKGVKQVIGQVAANLRSYRTPPEPYKKGKIRYSNEVVHMKEAKKMEVILLSKIK  
HI0914 LGYSHPVEHTLPVGI TAECPSQTEIVLKGADKQLIGQVAADLRAYRRPEPYKKGKIRYADEVVRTKEAKKMVILLDKIV  
PA3655 LGFSPVDYELPAGIVAETPSQTDILIKGIDKQLVGGVAAEIRDFRPPPEPYKKGKGVRYADEVVRTKEAKKMEVILLEKVA  
PM1985 LGFSPVHEHALPAGITAECPSQTEIVLKGADKQLIGQVAADLRAYRRPEPYKKGKGVRYADEVVRTKEAKKMVILLDKV  
RSc140 LGFSDHVIHEMPEGVKAETPTQTEIIVKGSQKQVIGQVAADLRAYRRPEPYKKGKGVRYANERVILKTKMQIILLEKVV  
STM021 LGFSPVDHQLPAGITAECTQTEIVLKGADKQVIGQVAADLRAYRRPEPYKKGKGVRYADEVVRTKEAKKMVILLDKVA  
STY024 LGFSPVDHQLPAGITAECTQTEIVLKGADKQVIGQVAADLRAYRRPEPYKKGKGVRYADEVVRTKEAKKMVILLDKVA  
vc2259 LGFSPVHEHALPAGITAECPSQTEIIVLTCGDKQVIGQVAADLRAYRRPEPYKKGKIRYADEVVRTKEAKKMVILLDKIG  
wbr31 LGFSSHQIKIKIPEAIFAECTNSNEIILSSVDKQKIGQFAANIRNYKISDPYKKGKIRYSYIEIKIKETKMQIILLKKII  
XAC142 LGFSHPLVFAPEGITLSTPTQTEIVVQGDQKQVGEVAAKIRGFRPPEPYKKGKGVYAGEVIRKEAKKMDLILLQKVT  
XCC137 LGFSHPLVFAPEGITLSTPTQTEIVVQGDQKQVGEVAAKIRGFRPPEPYKKGKGVYAGEVIRKEAKKMDLILLQKVT  
XF2579 LGFSHPLVFPPEGITLSTPTQTEIVVQGDQKQVGEVAAKIRGFRPPEPYKKGKGLYAAEAIMRKEAKKMDLILLQKVA  
y3135 LGFSPVDHQLPAGITAECTQTEIVLKGADKQVIGQVAADLRAYRRPEPYKKGKGVRYADEVVRTKEAKKMVILLDKVA  
YPO104 LGFSPVDHQLPAGITAECTQTEIVLKGADKQVIGQVAADLRAYRRPEPYKKGKGVRYADEVVRTKEAKKMVILLDKVA  
Z0181 LGFSPVDHQLPAGITAECTQTEIVLKGADKQVIGQVAADLRAYRRPEPYKKGKGVRYADEVVRTKEAKKMVILLDKVA

b0170 NLGSLGDQVNVKAGYARNFLVPPQKAVPATKKNIEFFEARAELEAKLAEVLAANARAEEKINAVTIASKAGDEGKLFGS  
Bbp214 NLGNKGDILFVKSQYARNFLIPYKGAIFATKDNKIFEFINKKEELERELIKKISIAKTKCEKIKNIIVPAQVIEGKLFGS  
Bf131 KVGKIGSEIIVKSGYARNFLFPKSKAVLSTKKNLAIFFKQOHILKSNLDSKRLKAEFRAKAINDITITVKSSIHGKLFGS  
bu232 KLGDGSAIVHVKSQYARNFLIPKGAAILASKNIESFEAQRVALEKEKINELLIAQSRAEKLKITITLPSKVGKEGKIFGS  
BUsG22 KLGDGSAIVHVKSQYARNFLIPKGAAILASKNIESFEAQRVALEKENISKLLIAQSRAEKIKTITITPSKVGKEGKIFGS  
HI0914 HLGQVGDQVNVKSGFARNFLIPQKAVMATKANIIEHFEARAELEAKAAEAQARAEEVAVTAVTIASKAGDEGRFLFGA  
PA3655 NLGNLGDQVNVKAGYARNFLVPPQKAVPATKKNIEFFEARAELEAKLAEVLAANARAEEKINAVTIASKAGDEGKLFGS  
PM1985 HLGNTIGDQVNVKSGFARNFLIPQKAVMATKANIIEHFEARAELEAKAAEAQARAEEVAVTAVTIASKAGDEGRFLFGA  
RSc140 NLGNLGDQVNVKAGYARNFLIPKQKARRATASAIQIEFEARAELEAKLAEVLAANARAEEKINAVTIASKAGDEGRFLFGS  
STM021 NLGSLGDQVNVKAGYARNFLVPPQKAVPATKKNIEFFEARAELEAKLADVLAANARAEEKINAVTIASKAGDEGKLFGS  
STY024 NLGSLGDQVNVKAGYARNFLVPPQKAVPATKKNIEFFEARAELEAKLADVLAANARAEEKINAVTIASKAGDEGKLFGS  
vc2259 NLGSLGDQVNVKAGYARNFLIPQKAVMATKANVAMFEARAELEAKVAEQALAAQTRADQVNAVVIASKAGDEGKLFGS  
wbr31 NKGNIIDKIKVAGYARNFLFPKKAIAIASEKNLKFPEKRRKILEEQSKYENFKLKERFRNIKSIEIYCKAGSKGKLFGS  
XAC142 NLGNLGDQVNVKSGYARNFLVPPQKAVPATKKNIEFFEARAELEAKLAEVLAANARAEEKINAVTIASKAGDEGKLFGS  
XCC137 NLGNLGDQVNVKSGYARNFLVPPQKAVPATKKNIEFFEARAELEAKLAEVLAANARAEEKINAVTIASKAGDEGKLFGS  
XF2579 NLGALGDQVNVKSGYARNFLVPPQKAVPATKKNIEFFEARAELEAKLAEVLAANARAEEKINAVTIASKAGDEGKLFGS  
y3135 NLGSLGDQVNVKAGYARNFLVPPQKAVPATKKNIEFFEARAELEAKLADVLAANARAEEKINAVTIASKAGDEGKLFGS  
YPO104 NLGSLGDQVNVKAGYARNFLVPPQKAVPATKKNIEFFEARAELEAKLADVLAANARAEEKINAVTIASKAGDEGKLFGS  
Z0181 NLGSLGDQVNVKAGYARNFLVPPQKAVPATKKNIEFFEARAELEAKLAEVLAANARAEEKINAVTIASKAGDEGKLFGS

b0170 IGTRDIADAVTEVAKSEVRLPVLRTTGEHEVVFQVHSEVFAKVIINNVANLQDKQAI VAEVSEVAKGALS AVVADSRGVT  
Bbp214 VGSRDIAKLSKIKKHEIYFLALKHVQGHVIFKPHHSVSI TVEINIVSDFKKKKELVTQINLI AKTALSIVVANPQGIK  
Bf131 IGSRDIAKLI TEVHKSQIRLPALKSIEGHNVCIHVNEIYANLTVHILNSIKKKEQIVCKIQEVFKISSAVIASLSNIT  
bu232 VGVRNIIKEIILKINKKEIRLPLLRQVGEHIVVFPQHSKVSINFIVKLIASIHDKKIVSKINIKSNTALS AVTADSRGVT  
BUsG22 IGIRNI IKEMNKVNKKEIKLPVLRQVGEHVI FQPHNEVCEYFIVNIISNLSKKTIVSKINQISNLSAIS IANSQGIS  
HI0914 ITTRDVAEAVTKIAKSEVRLPPIRTLGDHDFVFLHGEVFAALDVIVVANLQDKQAI VAEVNEAAKGAALS AVIADSRGVT  
PA3655 IGTRDIAEAVSPLEKAEVRLPALRNTGDFVAVHLHTDVE'TTLKLIIVAKLEDKKAIVAEVNEAAKGAALS AVVADSRGVT  
PM1985 ITTRDVAEAVTEVAKSEVRLSPIRTLGDHEVFKQLHGEVFATINVIIVANLQDKQAI VAEVNEAAKGAALS AVIADSRGVT  
RSc140 VTNHDIAAALTKVEKAQVRMPPLKTVGDDHPVAVSLHTDVSVDVTVSVLGNLEDKKAIVAEVTAQVAKASTIIVVAEYRGIT  
STM021 IGTRDIADAVTEVAKSEVRLPVLRTTGEHEVVFQVHSEVFAKVIINNVANLQDKQAI VAEVSEVAKGALS AVVADSRGVT  
STY024 IGTRDIADAVTEVAKSEVRLPVLRTTGEHEVVFQVHSEVFAKVIINNVANLQDKQAI VAEVSEVAKGALS AVVADSRGVT  
vc2259 IGTRDIADAVTEVAKSEVRLPALRNVGAEVYSVQLHSEVFAKVIINNVANLQDKKAI VAEVNEAAKGAALS AVVADSRGVT  
wbr31 IGANHIIEKIKRIMKNEIKLTPKKTIGKHNIKIKVKSNMCTEIVKILKNNRKNKENISKINIKTSLSLILIVDPTGIT  
XAC142 VGPRIIAEAFTPLEKSEVILGAFRNVGEYDVVLLHLHADVETTVKVIIVESNLSQKQEVVAELADIAAKAHSLIAAEYAGTT  
XCC137 VGPRIIAEAFTPLEKSEVILGAFRNVGEYDVVLLHLHADVETTVKVIIVESNLSQKQEVVAELADIAAKAHSLIAAEYAGIT  
XF2579 VGARDIAEAFTPLEKKEVILGFPFRLIGEYDVLLHLHADVETTVKVIIVQGNIFQKQEVVEELAGVAFKHSLIAAEYAGIT  
y3135 IGTRDIADAVTEVAKSEVRLPVLRTTAGEHEVHFQVHSDVFAKLVNVVVPNLQKQAI VAEVSEVAKGALS AVVADSRGVT  
YPO104 IGTRDIADAVTEVAKSEVRLPVLRTTAGEHEVHFQVHSDVFAKLVNVVVPNLQKQAI VAEVSEVAKGALS AVVADSRGVT  
Z0181 IGTRDIADAVTEVAKSEVRLPVLRTTAGEHEVHFQVHSDVFAKLVNVVVPNLQKQAI VAEVSEVAKGALS AVVADSRGVT

b0170 VDKMTELKREAGVYMRVVRNTLLRRVVEGTFPECLKDAFVGP TLIAESEHPGAAARLFKEFAKNAKFEVKA AAFEGE  
Bbp214 SNDITQLRKLARKSNVKGLYRNTLLNLGINKTPECLKNLIIIGPTLIIAYSEHPGSAAKLKNFSMNPFKLIGAVFEGK  
Bf131 SNSMNLKRESRDCGVYIKVIPNTLLRRALKNSLYECLSNFCIGQNI IAFSNNSPDAARLVNFSKNEYFKIAGAVCEGN  
bu232 VNKINELRKS GREVGVKMSIVQNTLLSLAIKNTVFELCKKLLKGSFTIAYS IHPGSGARLFKEFSKNTQFKITGAAFEGK  
BUsG22 VNKINELRKS GREIIGVKMSIVRNTLLSLAIKNTVFELCKKLLKGSFTIAYS IHPGSGARLFKEFSKNTQFKITGAAFEGK  
HI0914 VEKMTLRLKSAREAGVYMRVVRNTLLRRVVEGTFPECLKDTFVGP TLIAESEHPGAAARLFKEFAKNDKFEIKGA AFEGK  
PA3655 VGAMTGLRKEAREAGVYMRVVRNTLLRRVVEGTFPECLKDTFVGP TLIAESEHPGAAARLFKEFAKNDKFEIKGA AFEGK  
PM1985 VDKMTELKREAGVYMRVVRNTLLRRVVEGTFPECLKDTFVGP TLIAESEHPGAAARLFKEFAKNDKFEIKGA AFEGK  
RSc140 VGDITKLRAQARQQGVYLRVKNLTLARRAVEGTFPECLKDTFVGP TLIAESEHPGAAARLFKEFAKNDKFEIKGA AFEGK  
STM021 VDKMTELKREAGVYMRVVRNTLLRRVVEGTFPECLKDTFVGP TLIAESEHPGAAARLFKEFAKNAKFEVKA AAFEGE  
STY024 VDKMTELKREAGVYMRVVRNTLLRRVVEGTFPECLKDTFVGP TLIAESEHPGAAARLFKEFAKNAKFEVKA AAFEGE  
vc2259 VAMTNLRLKQAREAGVYMRVVRNTLLRRVVEGTFPECLKDTFVGP TLIAESEHPGAAARLFKEFAKNAKFEIKGA AFEGK  
wbr31 VSQMNLRKSSRKLNVNIKQVRNTLMRFAIVDTEFDCLEKYIKGSNLIAFSSHPGSAARLIFKNFTKNNKIKIKLAVFERK  
XAC142 SNQMTAMRKQARETGVLVVKVNTLARRAVEGTFPECLKDTFVGP TLIAESEHPGAAARLFKEFAKNDKFEIKGA AFEGK  
XCC137 VSQMTAMRKQARETGVLVVKVNTLARRAVEGTFPECLKDTFVGP TLIAESEHPGAAARLFKEFAKNDKFEIKGA AFEGK

XF2579 VSQMTAMRRQARESGVYLVKVNKLAARALGDTEYAVIKEKLIQPLLYAFSEDPGAAGRLIKESFKHDKLKSKTIVSLGGV  
y3135 VDKMTELRRAGREAGVHMVVRNTLLRRIVEGTPPECLKDTFVGPVTLIAFSEHPGAAARLFKAFAKNAKFEVKAAAFEGE  
YPO104 VDKMTELRRAGREAGVHMVVRNTLLRRIVEGTPPECLKDTFVGPVTLIAFSEHPGAAARLFKAFAKNAKFEVKAAAFEGE  
Z0181 VDKMTELRRAGREAGVYMRVVRNTLLRRIVEGTPPECLKDAFVGPVTLIAFSEHPGAAARLFKAFAKNAKFEVKAAAFEGE

b0170 LIDRLATLPTYEEA IARLMATMKEASKLVRTLAAVRMAKKVQAYVKLQVAAGMANPSPVPVGPALGQQGVNIMEFCKAFNA  
BBp214 AINSLADIPTFNEALRRFII IAKEISKLLRILVSIKMAKTIQAYIKLQVSAGTANPSPVPVGPALGQQGVNIMEFCKAFNT  
Bf131 FIDMLSRPLPNYNESLQLILILKVMMSKLVNKLILSVKVKVQSCIKLQIEARSATPSPVPVGPALGQQGVNIMEFCKDFNT  
bu232 LINQLADMPYTYEAI IKLLLTWKMLIKLIYTLSAIKMAKKIQSYIKLQVSAGAANPSPVPVGPALGQQGVNIMEFCKLFNK  
BUsg22 LINQLADMPYTYEAI IKLLLTWKMLIKLIYTLSAIKMAKKIQSYIKLQVAAGMANPSPVPVGPALGQQGVNIMEFCKLFNK  
HI0914 IVEFLATLPTYEEA IARLMGTMKEAASKLVRTLAAVRMAKKVQAYVKLQVAAGMANPSPVPVGPALGQQGVNIMEFCKAFNA  
PA3655 FIDVLASLPTYDEAVSOLMSVIQGATKLARTLAAIRMAKKIQAYIKLQVKAGQANPSPVPVGPALGQQHGVNIMEFCKAFNA  
PM1985 IVEFLATLPTYDEA IARLMGTMKEAASKLVRTLAAVRMAKKVQAYVKLQVAAGMANPSPVPVGPALGQQGVNIMEFCKAFNA  
RSc140 VVKALASIPREELLSKLLFVMQAPVGFARALAAAMAKKIIGFIKLQIPAGKANPSPVPVGPALGQQGVNIMEFCKAFNA  
STM021 LIDRLATLPTYEEA IARLMATMKEASKLVRTLAAVRMAKKVQAYVKLQVAAGMANPSPVPVGPALGQQGVNIMEFCKAFNA  
STY024 LIDRLATLPTYEEA IARLMATMKEASKLVRTLAAVRMAKKVQAYVKLQVAAGMANPSPVPVGPALGQQGVNIMEFCKAFNA  
vc2259 LPEVLATLPTYEEA IARLMCMCKEASKLVRTLAAVRMAKKVQAYVKLQVAAGMANPSPVPVGPALGQQGVNIMEFCKAFNA  
wbr31 IIDYLANLP THEESVINI IQEASKLIRILILINMTKKIKAYVKLQIKAGSANPSPVPVGPALGQQGVNIMEFCKSFNA  
XAC142 LVDVLASLPTDQALAMLARVLSEPA MFARAVKAVGMAKKITAFIKLQVKAGQANPAPPVGPALGQQGVNIMEFCKAFNA  
XCC137 LVDVLASLPTDQALAMLARVLSEPA MFARAVKAVGMAKKITAFIKLQVKAGQANPAPPVGPALGQQGVNIMEFCKAFNA  
XF2579 LVDVLASLPTDQALAMLARVLSEPA MFARAVKAVGMAKKITAFIKLQVKAGQANPAPPVGPALGQQGVNIMEFCKAFNA  
y3135 LIDRLATLPTYEEA IARLMGTMKEAASKLVRTLAAVRMAKKVQAYVKLQVAAGMANPSPVPVGPALGQQGVNIMEFCKAFNA  
YPO104 LIDRLATLPTYEEA IARLMGTMKEAASKLVRTLAAVRMAKKVQAYVKLQVAAGMANPSPVPVGPALGQQGVNIMEFCKAFNA  
Z0181 LIDRLATLPTYEEA IARLMATMKEASKLVRTLAAVRMAKKVQAYVKLQVAAGMANPSPVPVGPALGQQGVNIMEFCKAFNA

b0170 KTDSIEKGLPIPVVITVYADRSFTFVTKTPPAAVLLKKAAGIKSGSGKPNKDKVVKI SRAQLQEIAQTKAADMTGADIEA  
BBp214 RTNNEKGLPIPTIITVYSDKSFSTFKTTPASVLLKKAAGIKSGSKPNQNKVGTITMQQILIDIAQIKKIDMTGNSIDN  
Bf131 RTADFEMGLLIPVVIITVYSDRSFSTFKTTPAVFLKKAAGIKSGSEKPKCVSVGKVLISQIYEIAKIKLIDMTSLNLES  
bu232 KTENIEKGLPIPVVITVYSDRSFSTFKTTPASVLLKKAAGIKSGSKPNKDKVVKI INRSQIKIEIAI IKNNDMTGKSIEN  
BUsg22 TTENVEKGLPIPVVITVYSDRSFSTFKTTPASVLLKKAAGIKSGSKPKIETTGTIKLQIEEIAKTKNDMTGLNIES  
HI0914 RTESLEKGLPIPVVITVYADRSFTFVTKTPPAAVLLKKAAGIKSGSGKPNKDKVVKITLDQVRQIAETKAADMTGAT IET  
PA3655 KTQGGEPGLPTPVIITVYSDRSFSTFKTTPPAAVLLKKAAGIKSGSARPNQKVGTVTRAQLEIEIAQTKAADMTGADIEA  
PM1985 RTESLEKGLPIPVVITVYADRSFSTFKTTPPAAVLLKKAAGIKSGSGKPNKDKVVKITLQVRQIAETKAADMTGSS IET  
RSc140 QTQGMPEGLPVPVITAFADKSFSTFVMKSPATVLIKKAAGVQKGSAPKHTDKVVKITRAQAEIEIAKAKNADLTAADLDA  
STM021 KTDSIEKGLPIPVVITVYADRSFTFVTKTPPAAVLLKKAAGIKSGSGKPNKDKVVKI SRAQLQEIAQTKAADMTGADIEA  
STY024 KTDSIEKGLPIPVVITVYADRSFTFVTKTPPAAVLLKKAAGIKSGSGKPNKDKVVKI SRAQLQEIAQTKAADMTGADIEA  
vc2259 RTESLEKGLPIPVVITVYSDRSFSTFKTTPASVLLKKAAGIKSGSARPNQKVGTVTRAQLEIEIAKTKAADMTGADIEA  
wbr31 KTNIDKDTPIPVVITVYSDRSFSTFKTTPASVLLKKAAGIKSGSDNPNKKNKIKGKISIFKINEIAKKSXPDMTGSTLNS  
XAC142 ATSKLEPGLPTPVIITAYSDFSTFVTKTPASVLLKKAAGVSSGSKRPNTDKVVKVTRKQLEIEIAKVKADLTAEELEA  
XCC137 ATSKLEPGLPTPVIITAYSDFSTFVTKTPASVLLKKAAGVSSGSKRPNTDKVVKVTRKQLEIEIIVKVKADLTAEELEA  
XF2579 ATQKVEGLPTPVIITAYSDFSTFVTKTPASVLLKKAAGVSSGSKRPNTDKVVKVTRKQLEIEIAKTKAADMTGADIEA  
y3135 KTESIEKGLPIPVVITVYSDRSFSTFVTKTPPAAVLLKKAAGIKSGSGVPNKDKVVKVTSAQVREIAETKAADMTGSDVDA  
YPO104 KTESIEKGLPIPVVITVYSDRSFSTFVTKTPPAAVLLKKAAGIKSGSGVPNKDKVVKVTSAQVREIAETKAADMTGSDVDA  
Z0181 KTDSIEKGLPIPVVITVYADRSFTFVTKTPPAAVLLKKAAGIKSGSGKPNKDKVVKI SRAQLQEIAQTKAADMTGADIEA

b0170 MTRSIEGTARSMGLVVEITKDQIEAIVAAVMSVMDVVELISAMEEKFVGSAAAVAVAEAEETFDVILKAAGANKVAVIK  
BBp214 ISKSIIGTANSIGLIIAITEKQILDIAISEMSVMNIVELISDMKEKFGVSSISSSTIETAETFDVILKKSIGGNKVSIVIK  
Bf131 ASKSIMGTARSIGLEVELKKEEVLDAISEMSVMDIMQLISMIKFKVGSAAASHISSVTESETEFTVILSSIGGNKIPVIK  
bu232 MMRSEGTARSMGLIIEITKEQILEAISEMSVMNVVDLITAMEEKFVGSASMINSKDLRETFEFDIFLKVIGPNKVSIVIK  
BUsg22 MMRSEGTARSMGLIVEITKEQILEAVSEMSVMNVVELISAMEEKFVGSAAAVAVAEAEAEETFDVILKAAGANKVAVIK  
HI0914 KMKSIAGTARSMGLVVELTNEQIEAIAASKTVTEIVELIAAMEEKFVGSAAAVAAAAAAAEETFDVILKAGANKVAVIK  
PA3655 AVRTIAGSARSMGLVVELTNEQIEAIAASKTVTEIVELIAAMEEKFVGSAAAVAAAAAAAEETFDVILKAGANKVAVIK  
PM1985 KMKSIAGTARSMGLVVELTNEQIEAIAASKTVTEIVELIAAMEEKFVGSAAAVAAAAAAAEETFDVILKAGANKVAVIK  
RSc140 AVRTIAGSARSMGITVEITKDDILEAVSAMSVMELNDLVKAFEDKFGVSAAAAVAGAAPAEETFDVILKAGANKVAVIK  
STM021 MTRSIEGTARSMGLVVEITKDQIEAIVAAVMSVMDVVELISAMEEKFVGSAAAVAVAEAEAEETFDVILKAAGANKVAVIK  
STY024 MTRSIEGTARSMGLVVEITKDQIEAIVAAVMSVMDVVELISAMEEKFVGSAAAVAVAEAEAEETFDVILKAAGANKVAVIK  
vc2259 MKRSIAGTARSMGLVVEITNEQILDAIAEMSVQVVELISAMEEKFVGSAAAVVSGAAAVETEFVNI LAAAGANKVAVIK  
wbr31 ISKSIIGTARSMGLSIEINKQILDIAISEMSVLEI SELVSMMEKFKGVSSINNNINDESVESEFDVILLEIGKNKIVIK  
XAC142 AVRTIAGSARSMGLTVELTNEQIVDAIAEKSLMEVMELVKAIIEKFGVSAAAVAAAAAAAVVETEFVNI LKAGANKVAVIK  
XCC137 AVRTIAGSARSMGLTVELTNEQIVDAIAEKSLMEVMELVKAIIEKFGVSAAAVAAAAAAAVVETEFVNI LKAGANKVAVIK  
XF2579 AVRTIAGSARSMGLVVELTNEQIEAIAEKSIEMVMELVKAIIEKFGVSAAAVMSAAPVETEFVNI LKAGANKVAVIK  
y3135 MMRSEGTARSMGLVVEITKDQILEGVAALSVMEIVELISAMEEKFVGSAAVAAAAAGPVEAEETFDVILKAGANKVAVIK  
YPO104 MMRSEGTARSMGLVVEITKDQILEGVAALSVMEIVELISAMEEKFVGSAAVAAAAAGPVEAEETFDVILKAGANKVAVIK  
Z0181 MTRSIEGTARSMGLVVEITKDQIEAIVAAVMSVMDVVELISAMEEKFVGSAAAVAVAEAEAEETFDVILKAAGANKVAVIK

b0170 AVRGATGLGLKEAKDLVEAALKEGVSKDDAEALKKALEEAGAEVEVAKPETVKRDWYVVDATGKTLGRLATELARRLRGK  
BBp214 AVRSATGLGLKEAKDLVETI IKERITQDAAESLKKILNETGAEVE IAKSNDFKMMWYCIDATGKILGRLATLARRLRGK  
Bf131 AVRSITGLGLKEAKDLVEVTLKESVSKDDADNKKLTLESGASVE I SRLRIKRLWYIVDAKKNVGLRSLSSIAKYLIIGK  
bu232 TVRSATGLGLKEAKDLVETVLKENI SKEDAESLKTLEDVGAIE I I KSSNIKRHWYVVDATNKLGRLASALSFLHRGK  
BUsg22 SVRSATGLGLKEAKDLVETVLKENMSKNDAESLKTLEDAGAEIE I LKLNIDKRNWFYVDATNKLGRFASALSIRLRGK  
HI0914 AVRGATGLGLKEAKDLVEANLKEGVSKDEAEALKEEAEAGAEVEVAKPETVKRDWYVVDATGKTLGRLATELARRLRGK  
PA3655 VVRELTGLGLKEAKAVVDGVVKEGASKEEAEAKKALEEAGAKVELAKPETVQRDWFVVDAGQTLGRLATEIARRLRGK  
PM1985 AVRGATGLGLKEAKDLVEAVLKEGISAKEAEALKEEAEAGAEVEVAKPETVKRDWYVVDATGKTLGRLATELARRLRGK  
RSc140 AVREITGLGLKEAKDLVVKAMPKADADAACKLIEAGAEVEVAKPHEVKNWFYVDATDKVLRGVAEVLARRLRGK  
STM021 AVRGATGLGLKEAKDLVEAALKEGVSKDDAEALKKALEEAGAEVEVAKPETVKRDWYVVDATGKTLGRLATELARRLRGK  
STY024 AVRGATGLGLKEAKDLVEAALKEGVSKDDAEALKKALEEAGAEVEVAKPETVKRDWYVVDATGKTLGRLATELARRLRGK  
vc2259 AVRGATGLGLKEAKDLVDAVSAVKEAEALKEEAEAGAEVEVAKPETVKRDWYVVDABEGKTLGRLASEIASRLRGK  
wbr31 SVRSALSGLKESKDLIEITLKTGLNKKDAESLKEIETSGARIELLKNIARQNWIFDAKKNILGRFSTKLASILKKG  
XAC142 AVRAVTGLGLKEAKDLTEGMLKEGASKDEAEKIKKELTEAGATVE IAKSETVQRDWFVVDAGKTLGRLATELARRLRGK  
XCC137 AVRGVTLGLGLKEAKDLTEGILKEGVSKDEAEKIKKEMTEAGATVE IAKSETVQRDWFVVDAGKTLGRLATELARRLRGK  
XF2579 AVRAVTGLGLKEAKDLTEGILKEAVSKEEAEKVKKLEAAGATVEVAKNETVQRDWFVVDAGKTLGRLATELARRLRGK  
y3135 AVRGATGLGLKEAKDLVEAVLKEGVNKEAEETLKKALEEAGASVE IAKPETVKRDWYVVDASGKTLGRLATELARRLRGK  
YPO104 AVRGATGLGLKEAKDLVEAVLKEGVNKEAEETLKKALEEAGASVE IAKPETVKRDWYVVDASGKTLGRLATELARRLRGK  
Z0181 AVRGATGLGLKEAKDLVEAALKEGVSKDDAEALKKALEEAGAEVEVAKPETVKRDWYVVDATGKTLGRLATELARRLRGK

b0170 HKAEYTPHVDGDIYIIVLNADKVAVTGNKRDVYIYHHTGHIGGKQATFEEMIRRPVRIE IAVKGMPLPKGPLGRAMFRK  
BBp214 HKVEYTPHVDIGDYIIVINAKNIKVTGKCKDFYHHTGYVGLKKAIFKDMRYPERIIE IAVRGMPLPKGPLGRSMFRK

Bf131 HKVEYAPYVDVGDYIIVINASKDVCVTGRKYDKIYYRHTGYVGGIKKLTFFKQMI SYPNKVI ESSVRGMLPKNSLGRMMFKR  
bu232 HKTEYTPHLDTDGYIIVINASKILVTGNKRNKIYYHTGYVGGIKQSRFEEMI SHPERVIEIAVKGMLPKGALGRSMFKK  
BUsg22 HKIEYTPHLDTDGYIIVLNASKILVTGQKKNKVVYHHTGYIGGKQLRFEEIMKNPAKVEIEIAVKGMLPKGSLGRSMFKK  
HI0914 HKAETTPHVDTDGYIIVINADKVAVTGNKEDKLYWHHTGYVGGIKQATFKEMIRRP EAVIEIAVKGMLPKGPLGRAMFRK  
PA3655 HKPEYTPHVDTDGYIIVINAEQVVRTGAKTDKMYHHSFPGGKIKSINFEKLIKAPERVIEIAVKGMLPKGPLGRDYMRYK  
PM1985 HKAETTPHVDTDGYIIVINAEKVAVTGNKEDKLYWHHTGYVGGIKQATFKEMIRRP EAVIEIAVKGMLPKGPLGRAMYRK  
RSc140 HKPEYTPHVDTDGYIIVINAAKLRVTGAKTDKMYHHSFPGGKIKSINFEKLIKAPERVIEIAVKGMLPKGPLGYAMIKK  
STM021 HKAETTPHVDTDGYIIVLNADKVAVTGNKRDKVYHHTGYVGGIKQATFKEMIRRP EAVIEIAVKGMLPKGPLGRAMFRK  
STY024 HKAETTPHVDTDGYIIVLNADKVAVTGNKRDKVYHHTGYVGGIKQATFKEMIRRP EAVIEIAVKGMLPKGPLGRAMFRK  
vc2259 HKAETTPHVDTDGYIIVVNAEKVTVTGKANKMYYHRSEFPGLKSFSEKLIKPEMVLAVKGLPKGPLGRAMYRK  
wbr31 NDITYTPHVDSDGNYVIVINSKIKITGKLNKVFYHHTGYVGGIKKLSLVNMINNSELVIYKSVKGMPLPKGSLGRVMIKK  
XAC142 HKPVYTPHVDTDGYLVVINAEKIVVTGNKLDKYYHRFTGYIGNLKTESLEQALRHPERVIEIAVKGMLPKGPLGRMTYRK  
XCC137 HKPVYTPHVDTDGYLVVINAEKIVVTGNKLDKYYHRFTGYIGNLKTESLEQALRHPERVIEIAVKGMLPKGPLGRMTYRK  
XF2579 TKPVYTPHVDTDGYLVVINAEKVVVTGKLDKYYHRFTGYIGNLKTESLEQALRHPERVIEIAVKGMLPKGPLGRAMYRK  
y3135 HKAETTPHVDTDGYIIVLNAEKVAVTGNKRDKIYYHHTGYVGGIKQATFKEMIRRP EAVIEIAVKGMLPKGPLGRAMYRK  
YPO104 HKAETTPHVDTDGYIIVLNAEKVAVTGNKRDKIYYHHTGYVGGIKQATFKEMIRRP EAVIEIAVKGMLPKGPLGRAMYRK  
Z0181 HKAETTPHVDTDGYIIVLNADKVAVTGNKRDKVYHHTGYVGGIKQATFKEMIRRP EAVIEIAVKGMLPKGPLGRAMFRK

b0170 LKVYAGNEHNHAAQQPQVLDMIQEQTMLNVADNSGARRVMCIKVLGGSHRRYAGVGDIIKITIKEAIPRGKVKKGDVLA  
Bbp214 LKVYANDNHNHSAQNPQILNMIQEQSILNVADNSGARLAMCIKVLGGSRRRYAGIGDIKISIKEAIPRGKVKKGEVFA  
Bf131 LKVYSGSIHSHNAQSPKVLVLEIQRTEILNVADNSGARFAMCIKVLGGSKRRYANIGDVIKVTKEAIPKAKVKKGDVLA  
bu232 LKVFSENENHEHIAQCPQLNMIQEQTILNVADNSGARSAMCIKVLGGSRRRYAAIGDVIKITIKEAIPRGKVKKGEVLA  
BUsg22 LKVFSNENHDHIAQCPQLNMIQEQTILNVADNSGARSAMCIKVLGGSRRRYAAIGDIKISIKEAIPRGKVKKGEVLA  
HI0914 LKVYAGGEHQHAAQQPQVLDMIQEQTMLDVADNSGARSVMCIKVLGGSHRRYAAIGDIKITIVKEAIPRGKVKKGDVLA  
PA3655 LKVYKGAHPHTAQPPQELKMIQTQSMLDVADNSGARRVMCIKVLGGSHRRYAGIGDIKVTVKEAIPRGKVKKGDVLA  
PM1985 LKVYAGSEHNHAAQQPQVLDMIQEQTMLNVADNSGARSVMCIKVLGGSHRRYAAIGDIKITIVKEAIPRGKVKKGDVLA  
RSc140 LKVYAGSEHPHAAQQPQVLEMIQTESRLEVDANTGAREVMCIKVLGGSKRRYASVGDIIKVSVKDAAPRGRVKKGDIYNA  
STM021 LKVYAGNEHNHAAQQPQVLDMIQEQTMLNVADNSGARRVMCIKVLGGSHRRYAGVGDIIKITIKEAIPRGKVKKGDVLA  
STY024 LKVYAGNEHNHAAQQPQVLDMIQEQTMLNVADNSGARRVMCIKVLGGSHRRYAGVGDIIKITIKEAIPRGKVKKGDVLA  
vc2259 LKVYAGAEHNHAAQQPKVLDMIQMOTMLDAADNSGARSVMCIKVLGGSHRRYAHVGDIIKVTVKEAIPRGKVKKGDVLA  
wbr31 LKIFSGSEHNHAAQPKKLLMIQVQITLSVADNSGARLVMCIKVLGGSRRRYAKISDIKIAVKEAIPRAKVKKGEVLA  
XAC142 LKVYSGAEHPHAAQQPQVLDMIQMOSYLDVADNSGAKEVMCIKVLGGSKRRYAHIGDIKVTVKDAIPRGKVKKGEVDA  
XCC137 LKVYSGAEHPHAAQQPQVLDMIQMOSYLDVADNSGAKEVMCIKVLGGSKRRYAHIGDIKVTVKDAIPRGKVKKGEVDA  
XF2579 LKVYTGSKHPHAAQQPQVLDMIQMOSYLDVADNSGAKEVMCIKVLGGSKRRYASVGDIIKVTVKEAIPRGKVKKGEVDA  
y3135 LKVYAGTEHNHAAQQPQVLDMIQEQTMLNVADNSGARRVMCIKVLGGSHRRYAGIGDIKITIKEAIPRGKVKKGDVLA  
YPO104 LKVYAGTEHNHAAQQPQVLDMIQEQTMLNVADNSGARRVMCIKVLGGSHRRYAGIGDIKITIKEAIPRGKVKKGDVLA  
Z0181 LKVYAGNEHNHAAQQPQVLDMIQEQTMLNVADNSGARRVMCIKVLGGSHRRYAGVGDIIKITIKEAIPRGKVKKGDVLA

b0170 VVVRTKKGVRPDDGSVIRFDGNACVLLNNNSEPIGTRIFGVPVTRLELRSEKFMKIIISLAPEVMRLNLTSPAEGSKKAGKRL  
Bbp214 VIIRTKKGVRRSDGSIIRFDTNACVLLNNNDQPIGTRIFGVPVTRLELRNDKFMKIIISLAPEVMYRLNLTSPNSKSHKSKRV  
Bf131 VVVRTKKGIRIRIDGSIIRFDNACVLLNDTNMPLGTRIFGVPVTRLELRNDFVRIISLAPEVSLNTLAPALGRVGRV  
bu232 VVVRTKKGVRPDDGSVIRFDTNACVLLNNNEQPIGTRIFGVPVTRLELRTEKFMKIIISLAPEVMRLNLTSPANGARHSRKR  
BUsg22 VVVRTKKGVRPDDGSVIRFDNACVLLNNNEQPIGTRIFGVPVTRLELRTEKFMKIIISLAPEVMRLNLTSPANGARHSRKR  
HI0914 VVVRTKKGVRPDDGSVIRFDNACVLLNNNEQPIGTRIFGVPVTRLELRTEKFMKIIISLAPEVMRLNLTSPANGARHSRKR  
PA3655 VVVRTKKGVRPDDGSVIRFDNACVLLNNNEQPIGTRIFGVPVTRLELRTEKFMKIIISLAPEVMRLNLTSPAEGAKHSKR  
PM1985 VVVRTKKGVRPDDGSVIRFDNACVLLNNNEQPIGTRIFGVPVTRLELRTEKFMKIIISLAPEVMRLNLTSPAEGAKHSKR  
RSc140 VVVRTKKGVRPDDGSVIRFDNACVLLNNNEQPIGTRIFGVPVTRLELRTEKFMKIIISLAPEVMRLNLTSPAEGAKHSKR  
STM021 VVVRTKKGVRPDDGSVIRFDNACVLLNNNEQPIGTRIFGVPVTRLELRTEKFMKIIISLAPEVMRLNLTSPAEGSKKAGKRL  
STY024 VVVRTKKGVRPDDGSVIRFDNACVLLNNNEQPIGTRIFGVPVTRLELRTEKFMKIIISLAPEVMRLNLTSPAEGSKKAGKRL  
vc2259 VVVRTKKGVRPDDGSVIRFDNACVLLNNNEQPIGTRIFGVPVTRLELRTEKFMKIIISLAPEVMRLNLTSPAEGSKKAGKRL  
wbr31 VVVRTKKGVRPDDGSVIRFDNACVLLNNNEQPIGTRIFGVPVTRLELRTEKFMKIIISLAPEVMRLNLTSPAEGSKKAGKRL  
XAC142 VVVRTKKGVRPDDGSVIRFDNACVLLNNNEQPIGTRIFGVPVTRLELRTEKFMKIIISLAPEVMRLNLTSPAEGSKKAGKRL  
XCC137 VVVRTKKGVRPDDGSVIRFDNACVLLNNNEQPIGTRIFGVPVTRLELRTEKFMKIIISLAPEVMRLNLTSPAEGSKKAGKRL  
XF2579 VVVRTKKGVRPDDGSVIRFDNACVLLNNNEQPIGTRIFGVPVTRLELRTEKFMKIIISLAPEVMRLNLTSPAEGSKKAGKRL  
y3135 VVVRTKKGVRPDDGSVIRFDNACVLLNNNEQPIGTRIFGVPVTRLELRTEKFMKIIISLAPEVMRLNLTSPAEGSKKAGKRL  
YPO104 VVVRTKKGVRPDDGSVIRFDNACVLLNNNEQPIGTRIFGVPVTRLELRTEKFMKIIISLAPEVMRLNLTSPAEGSKKAGKRL  
Z0181 VVVRTKKGVRPDDGSVIRFDNACVLLNNNEQPIGTRIFGVPVTRLELRTEKFMKIIISLAPEVMRLNLTSPAEGSKKAGKRL

b0170 GRGIGSGLGKTGGRGHKGQKSRSGRRGFEGGQMPLYRRLPKFGFTTAEVRLSDLAKVEGGVVDLNTLKAANIIGIQIEF  
Bbp214 GRGIGSGFGKTSRGRGHKGQKSRSGRRGFEGGQMPLYRRLPKFGFVVAEVRLEDLKNFSNCIINLQFLKKTGLIKKNIKY  
Bf131 ARGISGFGKTAGRGHKGQKSRSGCKVSFEGGQPLHRRLPKFGFKTQEIITLFDLSRIPENVIDLNLKKYDIVSRKIRY  
bu232 GRGIGSGFGKTSRGRGHKGQKSRSGRRGFEGGQMPLYRRLPKFGFNTEVRLSDLSNLSTNIIDLNLKLANINQHVQR  
BUsg22 GRGIGSGFGKTSRGRGHKGQKSRSGNRGFEGGQMPYRRIKPFNFNTAEVRLSDISKLSTDIIDLKVLKKEININKIKY  
HI0914 GRGIGSGLGKTGGRGHKGQKSRSGRRGFEGGQMPLYRRLPKFGFTTAEVRLNELTKVEGNVLTLETLKAANILTKDIQF  
PA3655 GRGIGSGLGKTGGRGHKGQKSRSGGAPGFEGGQPLHRRLPKFGFVRAEVRTSELAKEGVDVSLQTLKLANINQHVQR  
PM1985 GRGIGSGLGKTGGRGHKGQKSRSGRRGFEGGQMPLYRRLPKFGFTTAEVRLNDLAKVEGGVVTLESKLANVITKDIQF  
RSc140 GRGIGSGLGKTAGRGHKGQKSRSGKVGFEFGGQMPHRRLPKRGFTTAEVRLGDLGALPVAEIDLTLKQAGLVGELVKS  
STM021 GRGIGSGLGKTGGRGHKGQKSRSGRRGFEGGQMPLYRRLPKFGFTTAEVRLSDLAKVEGGVVDLNTLKAANIIGIQIEF  
STY024 GRGIGSGLGKTGGRGHKGQKSRSGRRGFEGGQMPLYRRLPKFGFTTAEVRLSDLAKVEGGVVDLNTLKAANIIGIQIEF  
vc2259 GRGIGSGLGKTGGRGHKGQKSRSGRRGFEGGQMPLYRRLPKFGFTTAEVRLSELAKVTGDVVDLNLKAANLVTKNIEF  
wbr31 GRGIGSGKGTSGRGHKGQKSRSGRRGFEGGQMPLYRRLPKFGFTTAEVRLSELAKVTGDVVDLNLKAANLVTKNIEF  
XAC142 GRGIGSGLGKTAGRGHKGSFARKGGKAGFEFGGQTPMQRRLPKIGFRTAEVLSYQLDKLDAGDVDFALRAANLVPRAK  
XCC137 GRGIGSGLGKTAGRGHKGSFARKGGKAGFEFGGQTPMQRRLPKIGFRSAEVLASYQLDKLEAGIDFAALRAANLVPRAK  
XF2579 GRGIGSGLGKTAGRGHKGSFARKGGKAGFEFGGQTPMQRRLPKIGFRSAEVLASYQLDKLEAGIDFAALRAANLVPRAK  
y3135 GRGIGSGLGKTAGRGHKQNSRSGRRGFEGGQMPLYRRLPKFGFTTAEVRLSELALVEGDVIDLNTLKAANVVGIQMEF  
YPO104 GRGIGSGLGKTAGRGHKQNSRSGRRGFEGGQMPLYRRLPKFGFTTAEVRLSELALVEGDVIDLNTLKAANVVGIQMEF  
Z0181 GRGIGSGLGKTAGRGHKQKSRSGRRGFEGGQMPLYRRLPKFGFTTAEVRLSELALVEGDVIDLNTLKAANIIGIQIEF

b0170 AKVILAEVTTPTVTRGLRVTKGAKAAIEAAGGKIMLPKRTKFRKMHKGRNRLGTDVFSFGSLKAVGRRLTARQIEA  
Bbp214 VKIISSTITNLIIRNLFVSKSVRNIIESSGKIMLPKRTKFRKMHKGRNRLGTDVFSFGSLKAVGRRLTARQIEA  
Bf131 VKIIMSTFDKPVIIIRNLRISKARDLKS VGGRIILQPKRTKFRKMHKGRNRLGTDVFSFGSLKAVGRRLTARQIEA  
bu232 AKIILSKLTVPLIIRGLLVSKGARSEIENYGGKIMLPKRTKFRKMHKGRNRLGTDVFSFGSLKAVGRRLTARQIEA  
BUsg22 VKIILSKLEVALTLHLGLRVTRGARLAIENYGGKIMLPKRTKFRKMHKGRNRLGTDVFSFGSLKAVGRRLTARQIEA  
HI0914 AKVILAEVKSAVTVRGLRVTKGAKAAIEAAGGSIMLPKRTKFRKMHKGRNRLGTDVFSFGSLKAVGRRLTARQIEA  
PA3655 VKVMLSEVGRVAVTLKGIATKGAARAAIEAAGGKIMLPKRTKFRKMHKGRNRLGTDVFSFGSLKAVGRRLTARQIEA  
PM1985 VKIILAEVKGAVVVRGLRVTKGAKAAIEAAGGSIMLPKRTKFRKMHKGRNRLGTDVFSFGSLKAVGRRLTARQIEA  
RSc140 AKVILSSIDKVVTLKGLGATAGAKAAIEAAGGSLMLPKRRKRYRKEQKGRNTGIGNAVSFGFGLKAMGRRLTARQIEA

STM021 AKVILAEVTTPTVTVRGLRVTKGARAIEAAGGKIMLQPKRTKFRKMHKGRNRLGLGADVDFGSLKAVGRGRLTARQIEA  
STY024 AKVILAEVTTPTVTVRGLRVTKGARAIEAAGGKIMLQPKRTKFRKMHKGRNRLGLGADVDFGSLKAVGRGRLTARQIEA  
vc2259 AKIVLSEINKAVTVKGLRVTKGAKAAIEAAGGKIMLQPKRTKFRKMQKGRNRLNSBINFQGLKAIQHRGLTSRQIES  
wbr31 VKIIFSNFNKINIKNLKVSKNAKKIEFFGGTIMLQPKRTKFRKMHKGRNRLNSBINFQGLKAIQHRGLTSRQIES  
XAC142 AKIVLSEINKAVTVKGLRVTKGARAIEAAGGKIMLQPKRTKFRKMHKGRNRLGLGADVDFGSLKAVGRGRLTARQIEA  
XCC137 AKIVLSEINKAVTVKGLRVTKGARAIEAAGGKIMLQPKRTKFRKMHKGRNRLGLGADVDFGSLKAVGRGRLTARQIEA  
XF2579 AKIVKRLTLKVFVFLKGIESTAGARAMIETTGGSFMLQPKRTKFRKMHKGRNRLNSBINFQGLKAIQHRGLTSRQIES  
y3135 VKVILSEVNRAVTLRGLRVTKGARAIEAAGGKIMLQPKRTKFRKMHKGRNRLGLGADVDFGSLKAVGRGRLTARQIEA  
YPO104 VKVILSEVNRAVTLRGLRVTKGARAIEAAGGKIMLQPKRTKFRKMHKGRNRLGLGADVDFGSLKAVGRGRLTARQIEA  
Z0181 AKVILAEVTTPTVTVRGLRVTKGARAIEAAGGKIMLQPKRTKFRKMHKGRNRLGLGADVDFGSLKAVGRGRLTARQIEA

b0170 ARRAMTRAVKRQGGKIWRVFPDKPITEKPLAVRMGKGGKGNVEYVWALIQPGKVLVEMDGVPEELAREAFKLAALKPDKT  
BBp214 ARRAITRAIKRQGGKIWRVFPDKPITEKPLEVVRMGKGGKGNVEYVWALVQPGKILYEISGVSEELSRIFAKLAALKPDKT  
Bf131 ARRAITRAIKRQGGKIWRVFPDKPITEKPLEVVRMGKGGKGNVEYVWALVQPGKILYEMSGVSEELADHAFKLAALKPDKT  
bu232 ARRAITRAIKRQGGKIWRVFPDKPITEKPLEVVRMGKGGKGNVEYVWALVQPGKILYELEGVTEESRAAFKLAALKPDKT  
BUs922 ARRAITRYIKRQGGKIWRVFPDKPITEKPLEVVRMGKGGKGNVEYVWALVQPGKILYEMDGVSEELAREAFKLAALKPDKT  
HI0914 ARRAMSRAVKRQGGKIWRVFPDKPITEKPLEVVRMGKGGKGNVEYVWALVQPGKVLVEMDGVSEELAREAFKLAALKPDKT  
PA3655 ARRALTRHVKRQGGKIWRVFPDKPITEKPLEVVRMGKGGKGNVEYVWALVQPGKVLVEMDGVSEELAREAFKLAALKPDKT  
PM1985 ARRAMTRAVKRQGGKIWRVFPDKPITEKPLEVVRMGKGGKGNVEYVWALVQPGKVLVEMDGVSEELAREAFKLAALKPDKT  
RSc140 ARRAMTRHIKRQGGKIWRVFPDKPITEKPLEVVRMGKGGKGNVEYVWALVQPGKVLVEMDGVSEELAREAFKLAALKPDKT  
STM021 ARRAMTRAVKRQGGKIWRVFPDKPITEKPLAVRMGKGGKGNVEYVWALIQPGKVLVEMDGVPEELAREAFKLAALKPDKT  
STY024 ARRAMTRAVKRQGGKIWRVFPDKPITEKPLAVRMGKGGKGNVEYVWALIQPGKVLVEMDGVPEELAREAFKLAALKPDKT  
vc2259 ARRAMTRHIKRQGGKIWRVFPDKPITEKPLEVVRMGKGGKGNVEYVWALVQPGKVLVEMDGVPEELAREAFKLAALKPDKT  
wbr31 ARRAMSRSIKRQGGKIWRVFPDKPITEKPLEVVRMGKGGKGNVEYVWALVQPGKILYEIDVSETIARYAFKLATAKLPDKT  
XAC142 ARRTISRHVKKGGKMWIRVFPDKPITEKPLEVVRMGKGGKGNVEYVWALVQPGKILYEIDVSETIARYAFKLATAKLPDKT  
XCC137 ARRTISRHVKKGGKMWIRVFPDKPITEKPLEVVRMGKGGKGNVEYVWALVQPGKILYEIDVSETIARYAFKLATAKLPDKT  
XF2579 ARRSISRYVKKGGKLLIRVFPDKPITEKPLEVVRMGKGGKGNVEYVWALVQPGKILYEIDVSETIARYAFKLATAKLPDKT  
y3135 ARRAMTRAIKRQGGKIWRVFPDKPITEKPLEVVRMGKGGKGNVEYVWALVQPGKVLVEMAGVPEETAREAFKLAALKPDKT  
YPO104 ARRAMTRAIKRQGGKIWRVFPDKPITEKPLEVVRMGKGGKGNVEYVWALVQPGKVLVEMAGVPEETAREAFKLAALKPDKT  
Z0181 ARRAMTRAVKRQGGKIWRVFPDKPITEKPLAVRMGKGGKGNVEYVWALIQPGKVLVEMDGVPEELAREAFKLAALKPDKT

b0170 VTKTVMRHRKSGRQLNRNSSHRQAMFRNMAGSLVRHEIKTTLPKAKELRRVVEPLITLAKTDSVANRRLAFARTRDNEI  
BBp214 VTKLVMRHRKIGRRFNKSATHVKAMLNKVMCSLFRYEMIKTTVSKAKELRRVVEPLITCAKIDSANRRLAFARTRDNEI  
Bf131 VVTGIMKHQKRVLFNRSRSHRDMVKNMMLIALILNHIKTTLSPKAKELRRVVEPLITLAKTDSVANRRLAFARTRDNEI  
bu232 VTKTVMRHRKSGRQLNRNSSHRQAMFRNMAGSLVRHEIKTTLPKAKELRRVVEPLITLAKTDSVANRRLAFARTRDNEI  
BUs922 VTKMVMRHRKIGRKLNCKSDHRNAIFKNMACSLILNEIKTTLAKAKELRRVVEPLITLAKTDSVANRRLAFARTRDNEI  
HI0914 VTKTVMRHRKSGRQLNRNSSHRQAMFRNMAGSLVRHEIKTTLPKAKELRRVVEPLITLAKTDSVANRRLAFARTRDNEI  
PA3655 VTKTVMRHRKSGRQLNRNSSHRQAMFRNMAGSLVRHEIKTTLPKAKELRRVVEPLITLAKTDSVANRRLAFARTRDNEI  
PM1985 VTKTVMRHRKSGRQLNRNSSHRQAMFRNMAGSLVRHEIKTTLPKAKELRRVVEPLITLAKTDSVANRRLAFARTRDNEI  
RSc140 VTKTVMRHRKSGRQLNRNSSHRQAMFRNMAGSLVRHEIKTTLPKAKELRRVVEPLITLAKTDSVANRRLAFARTRDNEI  
STM021 VTKTVMRHRKSGRQLNRNSSHRQAMFRNMAGSLVRHEIKTTLPKAKELRRVVEPLITLAKTDSVANRRLAFARTRDNEI  
STY024 VTKTVMRHRKSGRQLNRNSSHRQAMFRNMAGSLVRHEIKTTLPKAKELRRVVEPLITLAKTDSVANRRLAFARTRDNEI  
vc2259 VTKQVMRHRKSGRQLNRNSSHRQAMFRNMAGSLVRHEIKTTLPKAKELRRVVEPLITLAKTDSVANRRLAFARTRDNEI  
wbr31 VTKMVMRHRKSGRQLNRNSSHRQAMFRNMAGSLVRHEIKTTLPKAKELRRVVEPLITLAKTDSVANRRLAFARTRDNEI  
XAC142 VTRTVMRHRKSGRQLNRNSSHRQAMFRNMAGSLVRHEIKTTLPKAKELRRVVEPLITLAKTDSVANRRLAFARTRDNEI  
XCC137 VTRTVMRHRKSGRQLNRNSSHRQAMFRNMAGSLVRHEIKTTLPKAKELRRVVEPLITLAKTDSVANRRLAFARTRDNEI  
XF2579 VTRTVMRHRKSGRQLNRNSSHRQAMFRNMAGSLVRHEIKTTLPKAKELRRVVEPLITLAKTDSVANRRLAFARTRDNEI  
y3135 VTRTVMRHRKSGRQLNRNSSHRQAMFRNMAGSLVRHEIKTTLPKAKELRRVVEPLITLAKTDSVANRRLAFARTRDNEI  
YPO104 VTKTVMRHRKSGRQLNRNSSHRQAMFRNMAGSLVRHEIKTTLPKAKELRRVVEPLITLAKTDSVANRRLAFARTRDNEI  
Z0181 VTKTVMRHRKSGRQLNRNSSHRQAMFRNMAGSLVRHEIKTTLPKAKELRRVVEPLITLAKTDSVANRRLAFARTRDNEI

b0170 VAKLFNDELGRPFASRAGGYTRILKCGFRAGDNAPMAYIELVDRRRATRARRKQLGELGATRLVVHRTPRHIYAQVIAGSEV  
BBp214 VFKLFRDLGPHFLGQGGYTRILKCGFRSGDQAPMAYIQLINRRRAARTRFQIKKHLHLIRLVVHRTSKHIYAQVIDNALV  
Bf131 VIKLFTQIGPHFYDRPGGYTRILKCGFRKGDNDAPMAYIELVDRRRALKLKKLYLLGSLVRLVVYRSRHRMYAQIVSNCNV  
bu232 VAKLFKLLGPFCCFFSRLGGYTRILKCGFRSGDQAPMAYIELVDRRRSMKTRCKIKKLGAILRVVHRTSRHMYAQIISSEAKV  
BUs922 IAKLFFKIGPIFYNRSGGYTRILKCGFRSGDQAPMAYIELVDRRRLLKARCKIKSLGAILRVVHRTSRHMYAQIISSEAKV  
HI0914 VAKLFNDELGRPFASRAGGYTRILKCGFRAGDNAPMAYIELVDRRRRAARARHMMREQGVTRLVHRTPRHIYAQVIAGSEV  
PA3655 VGKLFNDLGRYANRPGGYTRILKCGFRAGDNAPMAYIELVDRRRRAARARHMMREQGVTRLVHRTPRHIYAQVIAGSEV  
PM1985 VAKLFNDELGRPFASRAGGYTRILKCGFRAGDNAPMAYIELVDRRRRAARARHMMREQGVTRLVHRTPRHIYAQVIAGSEV  
RSc140 VTKLFTLGPYATRPGGYTRILKCGFRAGDNAPMALVELVDRRRARQTRKIAELNVARLAVHRTNLHIYAQVFSGTVK  
STM021 VAKLFNDELGRPFASRAGGYTRILKCGFRAGDNAPMAYIELVDRRRATRARRKQLGELGATRLVVHRTPRHIYAQVIAGSEV  
STY024 VAKLFNDELGRPFASRAGGYTRILKCGFRAGDNAPMAYIELVDRRRATRARRKQLGELGATRLVVHRTPRHIYAQVIAGSEV  
vc2259 VAKLFNDELGRPFASRAGGYTRILKCGFRAGDNAPMAYIELVDRRRATRARRKQLGELGATRLVVHRTPRHIYAQVIAGSEV  
wbr31 IHKLFNDIGPRFLKNGGYSILKSGYRKGDNAPMAYIKFTNTIRATRTRKIRSLIEIRLVVYRTSKHVYAQIISCSNV  
XAC142 VGKLFVELGPRYATRPGGYTRILKAGFRAGDNAPMAYVELVDRRRRAKSTRAHIRELGVARLSVLRGTQHLHYAQVFTGSKV  
XCC137 VGKLFVELGPRYATRPGGYTRILKAGFRAGDNAPMAYVELVDRRRRAKSTRAHIRELGVARLSVLRGTQHLHYAQVFTGSKV  
XF2579 VGILFNLGPRYATRPGGYTRILKCGFRAGDNAPMAYVELVDRRRRAKSTRAHIRELGVARLSVLRGTQHLHYAQVFTGSKV  
y3135 VAKLFNDELGRPFASRAGGYTRILKCGFRAGDNAPMAYIELVDRRRATRARRKQLGELGATRLVVHRTPRHIYAQVIAGSEI  
YPO104 VAKLFNDELGRPFASRAGGYTRILKCGFRAGDNAPMAYIELVDRRRATRARRKQLGELGATRLVVHRTPRHIYAQVIAGSEI  
Z0181 VAKLFNDELGRPFASRAGGYTRILKCGFRAGDNAPMAYIELVDRRRATRARRKQLGELGATRLVVHRTPRHIYAQVIAGSEV

b0170 LVAASTVEKAI AEQLGNKDAAAAVGKAVARALEKGIKDVSFDRSGFYHGRVQALADAAREAI IKQLEQEVPSFRPGDT  
BBp214 LTSASTVEKAI ELNLVGNIIHASICIGKIAERALMKGI INVSFDRSGFYHGRVQALADAAREAI IQEYKIP I FKS GDT  
Bf131 LVAASTTEKLI ASKLGKNEAAAVGQVIAERAFKKGIVHVSFDRSGFYHGRVQALADAAREAI IAEYARQFKIRNFESNIPPLHGDV

bu232 LVFASTLERKINCSLGNKEAAAIKGI I AERALS KGISHSVDFDRSGFYHGRVQALADAAREAI IQEYKIP I FKS GDT  
BUs922 LAFASTLESKI KSDLGNKEAAAIKGI I AERALS KGISHSVDFDRSGFYHGRVQALADAAREAI IQEYKIP I FKS GDT  
HI0914 LAAASTVEKAI REQVGNKDAAAAVGKAVARALEKGIKDVSFDRSGFYHGRVQALADAAREAI IKQLEQEVPSFRPGDT  
PA3655 LASASTLKDLDREGAGNIDAAKVGQVLAERAKAAGVQVAFDRSGFYHGRVQALADAAREAI IQEYKIP I FKS GDT  
PM1985 LAAASTVEKAI SEQVGNKDAAAAVGKAVARALEKGIKDVSFDRSGFYHGRVQALADAAREAI IKQLEQEVPSFRPGDT  
RSc140 LASASTAEAEVRKELGNTAAATLVGKRIAEKAKAAGIEAVAFDRSGFYHGRVQALADAAREAI IQEYKIP I FKS GDT  
STM021 LVAASTVEKAI AEQLGNKDAAAAVGKAVARALEKGIKDVSFDRSGFYHGRVQALADAAREAI IKQLEQEVPSFRPGDT  
STY024 LVAASTVEKAI AEQLGNKDAAAAVGKAVARALEKGIKDVSFDRSGFYHGRVQALADAAREAI IKQLEQEVPSFRPGDT  
vc2259 IAAASTVEKAI REQVGNIDAAKVGKAVARALEKGIKDVSFDRSGFYHGRVQALADAAREAI IKQLEQEVPSFRPGDT  
wbr31 LASASTLEKAI SNKVGKKAALLVGKIIAERALKKIKKIAFDRSGFYHGRVQALADAAREAI IQEYKIP I FKS GDT  
XAC142 IAAANTLQADV KDLKNSDAAAKVGKIIAERAKAAGIEKVAFDRSGFYHGRVQALADAAREAI IQEYKIP I FKS GDT  
XCC137 IAAANTLQADV KDLKNSDAAAKVGKIIAERAKAAGIEKVAFDRSGFYHGRVQALADAAREAI IQEYKIP I FKS GDT

XF2579 IAAANTLQSQVKDGLKNSLAATKAVGKLI AERAKAVGVDRIFAEDRSGLYHGRIKILADAARDAI IAEFESAVPQFSQDGT  
y3135 LVAASTVEKAI NEQLGNKDA AAAVGT I AERALEKGITKVSFDRSGFYHGRVQALADAAREAI IKQIEQEVPAPFRPGDS  
YPO104 LVAASTVEKAI NEQLGNKDA AAAVGT I AERALEKGITKVSFDRSGFYHGRVQALADAAREAI IKQIEQEVPAPFRPGDS  
Z0181 LVAASTVEKAI NEQLGNKDA AAAVGT I AERALEKGITKVSFDRSGFYHGRVQALADAAREAI IKQIEQEVPAPFRPGDT

b0170 VEKVVVVERLQAFEGVVI A IRNRGLHSAFTVRK I SNNEGVERV F QTHSPV VDS I SVKRRGAVR KAKLYL RERTGKAAR  
BbP214 I I I K V W I V E R I Q L F E G I V I A I R N R G L N S S F C V R K V S N G E G I E R V F P K Y S P I I B E I I V K R H G D V K K S K L Y L L R N R I G K S A K  
Bf131 V E I S L W I I E R F Q I F E G M I I A I K N R G L N S A F T V R K I S S G E G V E R V F Q I H S P V I K E I N I K K I G V V R R A K L Y L L R N L K G K S A R  
bu232 I E V K V W V I E R L Q S F E G I V I A I K N R C L N S S F T V R K I S N G E G V E R V F Q T H S H G I E E I L V K R K G L V R K A K L Y L R T R T G K A A R  
BUsG22 V E V K V W V I E R L Q S F E G I V I S I K N R S L N S S F T V R K V S N G E G I E R V F Q T H S Y S I D S I F V K R K G V R K A K L Y L R T R T G K S A R  
HI0914 L E V K V W V V E R L Q A F E G V V I A I R N R G L H S A F T L R K V S N G V G V E R V F Q T H S P A V D S I A V K R R G A V R K A K L Y L L R E R S G K S A R  
PA3655 V I V Q V K V K E R L Q A F E G V V I A K R N R G L N S A F T V R K I S N G V G V E R T F Q T Y S P I V D S L S V K R R G D V R K A K L Y L R A L S G K A A R  
PM1985 L E V K V W V V E R L Q A F E G V V I A I R N R G L H S A F T L R K V S N G V G V E R V F Q T H S P I V D S I T V K R K G A V R Q A K L Y L L R E R S G K S A R  
RSc140 V I V N V N V V E R V Q A Y E G V V I A K R N R G L N S S F I V R K I S S G E G V E R T F Q L Y S P L L A S I E V K R R G V R R A K L Y L L R E R S G K S A R  
STM021 V E V K V W V V E R L Q A F E G V V I A I R N R G L H S A F T V R K I S N G E G V E R V F Q T H S P V V D S I A V K R R G A V R K A K L Y L R E R T G K A A R  
STY024 V E V K V W V V E R L Q A F E G V V I A I R N R G L H S A F T V R K I S N G E G V E R V F Q T H S P V V D S I A V K R R G A V R K A K L Y L R E R T G K A A R  
vc2259 V V V Q V K V E R L Q A F E G I V I A I R N R G L H S A F T V R K I S N G E G V E R T F Q T H S P V V D S I E V K R R G A V R R A K L Y L L R D L S G K A A R  
wbr31 V K I N I W V L E R I Q I F E G I I I A I K N K G I S S S I T V R K I S N G E G V E R M F P L H S P I I E S I I V N R H S L V R K S K L Y L L R N K K G R S S R

XAC142 V V N V K V K E R V Q A Y E G V V I G T K N A G L N S S F T V R K I S H G F G V E R V F Q T H S A I I D S V E V K R R G K V R A G K L Y L R G L E G K A A R  
XCC137 V V N V K V K E R V Q A Y E G V V I G T K N A G L N S A F T V R K I S H G F G V E R V F Q T H S A I I D S V E V K R R G K V R A G K L Y L R G L E G K A A R  
XF2579 I V N V K V K E R L Q A Y E G V V I A T K N A G L N S A F T V R K I S H G Y G V E R V F Q T H S P I I E S I E I K R R G K V R A A K L Y L R G L E G K A A R  
y3135 V E V K V W V V E R L Q A F E G V V I A I R N R G L H S A F T V R K I S N G E G V E R V F Q T H S P V I D S I T V K R R G A V R K A K L Y L L R E R T G K S A R  
YPO104 V E V K V W V V E R L Q A F E G V V I A I R N R G L H S A F T V R K I S N G E G V E R V F Q T H S P V I D S I T V K R R G A V R Q A K L Y L L R E R T G K S A R  
Z0181 V E V K V W V V E R L Q A F E G V V I A I R N R G L H S A F T V R K I S N G E G V E R V F Q T H S P V V D S I S V K R R G A V R K A K L Y L L R E R T G K A A R

b0170 I K E R M A R V K R G V I A R A R H K K I L K Q A K G Y Y G A R S R V Y R V A F Q A V I K A G Q Y A Y R D R R Q R K R Q F R Q L W I A R I N A A A R Q N G I S Y  
BbP214 I R E L M A H V K R G V I A R A R H K K V L K Q A K G Y Y G A R S R T Y R T A R Q A I I K A G Q Y S Y R D R R Q R K R Y F R K L W I T R I N A A V R E N Q I S Y  
Bf131 I K T R M V R V K N S V T A H S R H K K I L K R A T G Y Y G A R S R T Y R V A Y Q A I I K A G Q Y A Y R D R K Q K R I F R Q L W I S H I N A V A R Q Y G L S Y  
bu232 I K E R M A R I K R G V I A H A R H K K I L K Q A K G Y Y G A R S R I Y R V A H Q A V I K A G Q Y A Y R D R R Q R K R Q F R Q L W I S R I N A A V R Q S K M S Y  
BUsG22 I K E R M A R V K R G V T A H A R H K K V L K Q A K G Y Y G A R S R I Y R V A C Q A V I K A G Q Y A Y R D R R Q R K R Q F R Q L W I T R I N A A A R Q S Q M S Y  
HI0914 I K E R M A R V K R G V I A R A R H K K V L K A A K G Y Y G A R S R V Y R V A F Q A V I K A G Q Y A Y R D R R Q R K R Q F R Q L W I A R I N A A A R Q N G L S Y  
PA3655 I K E M A R V K R G V I A R R R H K K I L K L A K G Y Y G A R S R V F R V A Q A V I K A G Q Y A Y R D R R Q R K R Q F R A L W I A R I N A G A R Q N G L S Y  
PM1985 I K E R M A R V K R G V I A R A R H K K V L K A A K G Y Y G A R S R V Y R V A F Q A V I K A G Q Y A Y R D R R Q R K R Q F R Q L W I A R I N A A A R Q N G L S Y  
RSc140 I K E M P R V K R G V T A R A R H K K V I D A A K G Y R G R R N N V Y R I A K Q A V M R A G Q Y A Y R D R R N K R V R F R A L W I A R I N A A G A R H G L S Y  
STM021 I K E R M A R V K R G V I A R A R H K K I L K Q A K G Y Y G A R S R V Y R V A F Q A V I K A G Q Y A Y R D R R Q R K R Q F R Q L W I A R I N A A A R Q N G I S Y  
STY024 I K E R M A R V K R G V I A R A R H K K I L K Q A K G Y Y G A R S R V Y R V A F Q A V I K A G Q Y A Y R D R R Q R K R Q F R Q L W I A R I N A A A R Q N G I S Y  
vc2259 I K E M P R V K R G V Q A R R R H K K I L T L A K G Y Y N A R R K V F R V A Q A V I K A Q Q Y A Y I G R K Q K R N F R S L W I T R I N A A A R I N G L S Y  
wbr31 I K Q R M T R I K R G V S S K F R H K K I L K K T K G Y Y G A R S R S Y R I A F Q A F I K A G Q Y A Y R D R K N K R T F R K I W I C R I N S A V R K H G L S Y  
XAC142 I K E M A R V K R G V Q A R R R H K K I L T L A K G Y Y N A R R K V F R V A Q A V I K A Q Q Y A Y I G R K Q K R N F R S L W I T R I N A A A R I N G L S Y  
XCC137 I K E M A R V K R G V Q A R R R H K K I L T L A K G Y Y N A R R K V F R V A Q A V I K A Q Q Y A Y I G R K Q K R N F R S L W I T R I N A A A R I N G L S Y  
XF2579 I K E M A R V K R G V Q A R R R H K K I L S L A K G Y Y N A R R K V F R V A Q A V I K A Q Q Y A Y I G R K Q K R N F R S L W I V R I N A A A R I N G L S Y  
y3135 I K E R M A R V K R G V I A R A R H K K I L K Q A K G Y Y G A R S R V Y R V A F Q A V I K A G Q Y A Y R D R R Q R K R Q F R Q L W I A R I N A A A R Q N G L S Y  
YPO104 I K E R M A R V K R G V I A R A R H K K I L K Q A K G Y Y G A R S R V Y R V A F Q A V I K A G Q Y A Y R D R R Q R K R Q F R Q L W I A R I N A A A R Q N G L S Y  
Z0181 I K E R M A R V K R G V I A R A R H K K I L K Q A K G Y Y G A R S R V Y R V A F Q A V I K A G Q Y A Y R D R R Q R K R Q F R Q L W I A R I N A A A R Q N G I S Y

b0170 S K F I N G L K K A S V E I D R K I L A D I A V F D K V A F T A L V E K A K A M Y A V F Q S G G K Q H R V S E G Q T V R L E K L D I A T G E T V E F A E V L M  
BbP214 S K F M Y G L K K A S I A V D R K M L S E L A I F D N V S F C S L I K S S K D A M Y A I F K S G G K Q H K V I K G Q T I R L E K I N Q S I G T Q I K F K K I L M  
Bf131 N N L I N N L Y K S S I Y I N R K M L A E L A T S D Q V A F L N L V N N I K I H M Y A V F Q I G S K Q Y Y V R T G Q V I F I D R V K L D I G N Q I E F N Q V L L  
bu232 S N F I F G L K K A S I N I D R K I L S D I A I F D L L S F N A L V K K A K E A M Y A V F I S G G K Q Y R V V K N Q I I R L E K L N S P L G T T I E F D K I L M  
BUsG22 S S F M Y G L K K A S I N I D R K I L S D I A I F D G F S F N I L I K K A K E A M Y A V F M S G G K Q Y R V V K N Q I I Q L E K L N S P G S I E F D K I L M  
HI0914 S K F I N G L K K A S V E I D R K I L A D I A V F D K V A F A A L V E K A K S A M Y A V F Q S G G K Q H R V S E G Q V R L E K L E L A T G A T V E F D S M L M  
PA3655 S R L I A G L K K A A I E I D R K V L A D L A V N E K A A F T A I V E K A K A S M Y A V I V T G G K Q H K V T E G E F L K V E G F L R V E K L I D F D R V L L  
PM1985 S K F I N G L K K A S V E I D R K I L A D I A V F D K V A F T A L V E K A K S A M Y A V F Q S G G K Q H R V S E G Q V R L E K L E V A T G E T V E F D S V L M  
RSc140 S K F M N G L K K A S I E L D R K V L S D M A I H D K V A F A A I V N Q V K A N M Y A V V T G G K Q Y K V A A G E K L K V E Q I P A D V G A B E I T L D Q V L A  
STM021 S K F I N G L K K A S V E I D R K I L A D I A V F D K V A F T A L V E K A K A M Y A V F Q S G G K Q H R V S E G Q T V R L E K L D I A T G E T I E F A E V L M  
STY024 S K F I N G L K K A S V E I D R K I L A D I A V F D K V A F T A L V E K A K A M Y A V F Q S G G K Q H R V S E G Q T V R L E K L D I A T G E T I E F A E V L M  
vc2259 S R F I N G L K K A S I E I D R K I L A D I A V F D K A A F A V L V E K A K G A M Y A V F Q S G G K Q H R V S E G Q T L R L E K L D V E T G A T V E F D K V L L  
wbr31 S C F M Y I K K L S I F I D R K I L S D L A V L N E K A A F I S E L I K K V K S I M Y A I F K I N G V Q Y K A K S G V V L N K I S G D I G S T I E I K K I M A  
XAC142 S R F M N G L L K A G I T L D R K V L A D I A V H D A A G F A A L A E K A K A M Y A V L V T G G K Q Y R V A Q G E T L R V E K L E V E A G N E I K F D T I L M  
XCC137 S R F M N G M L K A G I T L D R K V L A D I A V H D A A G F A A L A E K A K A M Y A V L V T G G K Q Y R V A Q G E T L R V E K L E V E A G N E I K F D T I L M  
XF2579 S R F M N G L L K C G I T L D R K V L A D I A V H D P A G F T A L A E K A K S I M Y A V L V T G G K Q Y R V V Q G E T L R V E K L D V E T G S D V T F N S V L L

y3135 S R F I N G L K K A S V E I D R K I L A D I A V F D K V A F S A L V E K A K A M Y A V F Q S G G K Q H R V S E G Q T I R L E K L D I A T G E T I E F D Q V L M  
YPO104 S R F I N G L K K A S V E I D R K I L A D I A V F D K V A F S A L V E K A K A M Y A V F Q S G G K Q H R V S E G Q T I R L E K L D I A T G E T I E F D Q V L M  
Z0181 S K F I N G L K K A S V E I D R K I L A D I A V F D K V A F T A L V E K A K A M Y A V F Q S G G K Q H R V S E G Q T V R L E K L D I A T G E T V E F A E V L M

b0170 I A G E E V K I G V P F V G V I K A E V V A H G R G E K V I V K F R R R K H Y R K Q Q G H R Q W F T D V K I T G M E T I A K H R H A R S S A Q K V R L V A D L  
BbP214 C C G T H I T I G K P H I N F I L A N I I N H G R H K K I K I I K F N R R K H Y K Q Q G H R Q N F T D V L I T N M E T I A R H S Q A R S S A Q K L R L V A D L  
Bf131 I R M K N I Y I G N P F I G K I I A D I L D H S L G K K I R I V K F R R R K H F R K F Q G H R Q C M T K I K V V K M E T I A R Y R Y I R S S A Q K I R L V A N M  
bu232 L F K D S I K I G T P F V G T I K A H I Q N H G R L G K K I K I I K F N R R K H Y K Q Q G H R Q Y F T D V K I I D M E T L A Q H R Q A R S S A Q K V R L I V D L  
BUsG22 I S K K E V K I G E P F L T K I K A H V E N H G R L K K I K I I K F N R R K H Y K K Q G H R Q Y F T N V K I L D M E T L A Q H R Q A R C S A Q K I R L I A D L  
HI0914 V V G E D V K I G A P V V A K V V A E V V A Q G R G E K V I V K F R R R K H S R K Q Q G H R Q W F T E V K I T G M E T I A K H R Y A R T S A Q K A R L V A D L  
PA3655 V A G E D V K I G L P V V A K V T A E V V S H G R H D K V I I K F R R R K H M K R Q Q G H R Q W F T E I K I T G M E V A A K L S G A I S A Q K A R L V A D Q  
PM1985 I V G E D V K I G A P V V G K V V A E V V A H G R G D K V I V K F R R R K H S R K Q Q G H R Q W F T E V K I T G M E T I A K H R Y A R T S A Q K A R L V A D L  
RSc140 V G G D Q L K V G A P L V A A V K A T V I S H G R H D K V I F K M R R R K H Y Q K H Q G H R Q N Y T E L R I D S M E V K A I H R G A R I S A Q K T R L V A D Q  
STM021 I A G E E V K I G V P F V G V I K A E V V A H G R G E K V I V K F R R R K H Y R K Q Q G H R Q W F T D V K I T G M E T I A K H R H A R S S A Q K V R L V A D L  
STY024 I A G E E V K I G V P F V G V I K A E V V A H G R G E K V I V K F R R R K H Y R K Q Q G H R Q W F T D V K I T G M E T I A K H R H A R S S A Q K V R L V A D L  
vc2259 V A G E D I K V G A P L V G K V V A E V V Q H G R G D K V I V K F R R R K H S R K Q Q G H R Q W F T E V K I T G M E A I A K H N F A R I S P Q K A R L V A D Q  
wbr31 L F D E K I I F G Q P F I S R I I A T I K K H I N G K K I S I V K F S R R K H F K K I T G Y R Q L T N I K I I D M E T V A H R Y A K S S Q K V R L V A D L  
XAC142 L G S D G I K L G D A L K A S V T A K V V A H G R A D K V R I I K F R R R K H M K R Q G H R Q H Y T E I E I T G M E A K A I L R T A R I S P Q K A R L V A D Q  
XCC137 L G S D G I K L G D A L K A S V T A K V V A H G R A D K V R I I K F R R R K H M K R Q G H R Q Y T E I E I T G M E A K A I L R T A R I S P Q K A R L V A D Q  
XF2579 M G S D G I H V G E A L K A S V T A K V V A H G R A K V R I I K F R R R K H M K R Q G H R Q Y T E I Q I T G M E A T A I L R G A R I S P Q K A R L V A A Q  
y3135 I A G E E I N I G A P L V G K I K A E I I A H G R G E K I K I V K F R R R K H Y R K Q Q G H R Q W F T D V K I T G M E T I A K H R H A R S S A Q K V R L V A D L  
YPO104 I A G E E I N I G A P L V G K I K A E I I A H G R G E K I K I V K F R R R K H Y R K Q Q G H R Q W F T D V K I T G M E T I A K H R H A R S S A Q K V R L V A D L  
Z0181 I A G E E V K I G V P F V G V I K A E V V A H G R G E K V I V K F R R R K H Y R K Q Q G H R Q W F T D V K I T G M E T I A K H R H A R S S A Q K V R L V A D L

b0170 IRGKKVQALDILTYTNKKAALVVKVLESAINAEHNDGADIDDLKVTKIFVDEGSPMKRIMPRAKGRADRILKRTSHI  
BBp214 IRGKNEHALNLTFCNKKASILVKKVLESAINAEHNDGADIDDLKVTKIFVDEGSPMKRIMPRAKGRADRILKRTSHI  
Bf131 IRKKEVVKAINILNLYVNKKAALLVKKVLESAINAEHNFGLNIDKLRVVKIFVDCGSPKIKRVMMPRAKGRSDRIVKRTSHL  
bu232 IRGKKVPQALNLTITYNKKAALVVKVLESAINAEHNDGADIDDLKVTKIFVDEGSPMKRIMPRAKGRADRILKRTSHI  
BUsg22 IRGKKVVKALNLTITYNKKAALVVKVLESAINAEHNDGADIDDLKVTKIFVDEGSPMKRIMPRAKGRADRILKRTSHI  
HI0914 IRGKKVAQALEILTFNKKAAALVKKVLESAINAEHNDGADIDDLKVTKIFVDEGSPMKRIMPRAKGRADRILKRTSHI  
PA3655 IRGKKVGEALNLLAFSSKKAAEIMKKVLESAINAEHNDGADIDDLKVTKIFVDEGSPMKRIMPRAKGRADRIVKRSCHI  
PM1985 IRGKKVAAALEILTFNKKAAALVVKVLESAINAEHNDGADIDDLKVTKIFVDEGSPMKRIMPRAKGRADRILKRTSHI  
RSc140 IRGLPIERALNVLAFSPKKAAVIVKKVLESAINAEHNDGADIDDLKVTKIFVDEGSPMKRIMPRAKGRADRILKRTSHI  
STM021 IRGKKVQALDILTYTNKKAALVVKVLESAINAEHNDGADIDDLKVTKIFVDEGSPMKRIMPRAKGRADRILKRTSHI  
STY024 IRGKKVQALDILTYTNKKAALVVKVLESAINAEHNDGADIDDLKVTKIFVDEGSPMKRIMPRAKGRADRILKRTSHI  
vc2259 IRGKSVQALELTLTFNKKAAALVKKVLESAINAEHNDGADIDDLKVTKIFVDEGSPMKRIMPRAKGRADRILKRTSHI  
wbr31 IRGCDASRAMELNFSNKKAAARLILKLSAISNAEHNENENENLKIKTIVYVNGPSPKIKRIMPRAKGRSDRILKRTSHI  
XAC142 VRGLSAERAVNLLKFSKKAHLIKKVVESAINAEHNDGADIDDLKVTKIFVDEGSPMKRIMPRAKGRGTRILKRTSHI  
XCC137 VRGLSAERAVNLLKFSKKAHLIKKVVESAINAEHNDGADIDDLKVTKIFVDEGSPMKRIMPRAKGRGTRILKRTSHI  
XF2579 VRGLSAESAVNILRFSSKKAACLILKVVESAINAEHNDGADIDDLKVTKIFVDEGSPMKRIMPRAKGRSDRILKRTSHI  
y3135 IRGKKVQALETLTYTNKKAALVVKVLESAINAEHNDGADIDDLKVTKIFVDEGSPMKRIMPRAKGRADRILKRTSHI  
YPO104 IRGKKVQALETLTYTNKKAALVVKVLESAINAEHNDGADIDDLKVTKIFVDEGSPMKRIMPRAKGRADRILKRTSHI  
Z0181 IRGKKVQALDILTYTNKKAALVVKVLESAINAEHNDGADIDDLKVTKIFVDEGSPMKRIMPRAKGRADRILKRTSHI

b0170 TVVVSCLKVRAPHVSEKASTAMEKSTIVLKVAKDATKAEIKAAVQKLFVEVEVEVNTLVVKGKVKRHHGQIRGRRSDWKA  
BBp214 TIVVSLKVLGPHISEKSSITLGNFTVIKIVSICATKLEIKRAVQNMFNVAKNVNTLVVQKCKRKRKSRITCSSNWKA  
Bf131 TIVVSLKVRAPHVSEKSSIALDKNVIVLKVYVNTKQDIRHAVCMFLSVKIKKINVLMSVKGSKGQRYLRCNWKA  
bu232 TVIVSLKILLSPHVSEKTSISMKEFTVVLKVLNNAATKYEIKYAVKIFDQVDSIKTLKVKGKQKQSNRIIQRSHWKA  
BUsg22 TVIVSLKVLSPHISEKSSISMKEFTVVLKVSRTTKNEIKFAVQNLFNIQVESVKTIVYVKGKQKQSNRIIYRSDWKA  
HI0914 TVVVSCLKVRAPHVSEKATNNAEKSTIVLKVAKDANKAEIAAQAQLEFVVKVDSVTVVVKGKTRHGMGRSDWKA  
PA3655 TVKVAFKVLLGPHISEKATGLADGKQFVFKVATDATKLEIKKAVESLFSVKVQVVTTLNVKGGKTKRTARGLGKRNDWKA  
PM1985 TVVVSCLKVRAPHVSEKATNNAEKSTIVFVALDANKVEIANAVEQLFEVVKVDSVTVVVKGKTRHGMGRSDWKA  
RSc140 TVTLMQVLLSPVSEKATLVDANKQVVFVARDANKGEIAAQAQLEFVVKVDSVTVVVKGKTRHGMGRSDWKA  
STM021 TVVVSCLKVRAPHVSEKASTAMEKSTIVLKVAKDATKAEIKAAVQKLFVEVEVEVNTLVVKGKVKRHHGQIRGRRSDWKA  
STY024 TVVVSCLKVRAPHVSEKASTAMEKSTIVLKVAKDATKAEIKAAVQKLFVEVEVEVNTLVVKGKVKRHHGQIRGRRSDWKA  
vc2259 TVVVALKVRAPHVSEKATMSAEKSTIVLKVAKDATKAEIKAAVEKLFVEVEVKSNTLIIKGGTKRQGLRQGRSDWKA  
wbr31 TIVLSFKILTSSYSSEKSSILSEKNTFTFKVLKNSKSEIKSSIEKFFNVKVKVTRVMLKGGKSKKHNIIGKRKNWKA  
XAC142 TVVVGFSVLRAPRVSEKATRLQEISQYVFEVSNKADVKAAVEQLFDVKVAVNVVNVKGGKSKFRNRRAGNRGNWKA  
XCC137 TVVVGFSVLRAPRVSEKATRLQEISQYVFEVSNKADVKAAVEQLFDVKVAVNVVNVKGGKSKFRNRRAGNRGNWKA  
XF2579 TVVVGFGVLRAPRVSEKSSRLQEISVYVFEVSSDATKVDKNAVERLFDVKVGVVRLNVKGGKSKFRNRRAGNRGNWKA  
y3135 TVVVSCLKVRAPHVSEKASAMEKNTIVLKVAKDATKAEIKAAVQKLFVEVEVEVNTLVVKGKSKRHHGQIRGRRSDWKA  
YPO104 TVVVSCLKVRAPHVSEKASAMEKNTIVLKVAKDATKAEIKAAVQKLFVEVEVEVNTLVVKGKSKRHHGQIRGRRSDWKA  
Z0181 TVVVSCLKVRAPHVSEKASTAMEKSTIVLKVAKDATKAEIKAAVQKLFVEVEVEVNTLVVKGKVKRHHGQIRGRRSDWKA

b0170 YVTLKEGQNLDFVGGAKIRRDDEVIVLTGKDKGKRGKVKVNIIVEGINLVKHKQKPVGGIVEKEAAIQVSNVAIFNAAGKA  
BBp214 YVTLKRGQNIINFIGSAKIKKNDQVIVLIGKDKGKIGIVRQVIVEGVNIIVKHKTKPSGGIVEQESSINIENIAILNPTKKS  
Bf131 YVILKRGYITVDLMMNKRIRCHDEVVLTGKDKGKIGIRVQFVIVSGINNVKHKQKPVGGIVEKEEAFIHLSNVAIFNAANKA  
bu232 YIKVKKGCNLDIFGNLKLRRNDSVLLTGKDKGKGTGIIKKNVIVKGLNLKIKKQKPVGGIVEKEEAPIHSNIAIFNPEKKA  
BUsg22 YIKVKKGCNLDIFMNSNLKLRNDEIILTGKDKGKGTGIIKNAIVNGLNLVKKHKQKPLGGILEKEAPIQISNIAIFNPEKKA  
HI0914 YVTLAEGQNLDFVDSAKIRQNDDEVIVLTGKDKGKRGKVTQVVEGNIITKHEKPVGGIVKKEAADSNVAIFNPKNKA  
PA3655 YIALQPGQDLDFATSQKIRRDDEVIVLTGKDKGKRGKVKVLLVGGVNLKIRHKTNGGIVEKEEAPLHVSNAIFNTESKA  
PM1985 YVTLQEGQSLDFVEGAKIRQNDDEVIVLAGKSKGKRGKVTQVIVEGVNIITKHEKPVGGIVKKEAADSNVAIFNPKNKA  
RSc140 YVSLKPGQEINFAENKIRKGDVIVRTGKDKGKQGTVLAIVTVEGVNVAKKHVRPNGGVVDKVMPIHISNVALVDANGKP  
STM021 YVTLKEGQNLDFVGGAKIRRDDEVIVLTGKDKGKRGKVKVNIIVEGINLVKHKQKPVGGIVEKEAAIQVSNVAIFNAAGKA  
STY024 YVTLKEGQNLDFVGGAKIRRDDEVIVLTGKDKGKRGKVKVNIIVEGINLVKHKQKPVGGIVEKEAAIQVSNVAIFNTEGKA  
vc2259 YVTLNKGQDLDFVGGAKIRQNDDEVIVLAGKDKGKGVTKVIVEGINLVKHKQKPVGGIVEQEAADSNVAIFNAAGKA  
wbr31 YVLLKKNQILNLIKNNKIKLNDIIVRVGKYGKGTGIIKKAIEGINISKKHKKPTGGIFKEQPIISLNSVAIFNIDNKP  
XAC142 YVRLVDGQSIDVTAKNRIKKGQVIVINTGKDKGKQGEVVRVIVSNANVIRHHTKPNGGVVEREASIHISNVIIVNPAKGG  
XCC137 YVRLVDGQSIDVTAKNRIKKGQVIVINTGKDKGKQGEVVRVIVSNANVIRHHTKPNGGVVEREASIHISNVIIVNPAKGG  
XF2579 YVRLIDGQSIDVAANSRIKKGQVIVINTGKDKGKQGEIIRVVSNVNIIVRHTKPNGLIDREAPIHVSNIIVNPAKGG  
y3135 YVTLKEGQNLDFIGGAKIRRDDEVIVLTGKDKGKRGKVKVNIIVEGINLVKHKQKPVGGIVEKEAAIQVSNLALFNATGKA  
YPO104 YVTLKEGQNLDFIGGAKIRRDDEVIVLTGKDKGKRGKVKVNIIVEGINLVKHKQKPVGGIVEKEAAIQVSNLALFNATGKA  
Z0181 YVTLKEGQNLDFVGGAKIRRDDEVIVLTGKDKGKRGKVKVNIIVEGINLVKHKQKPVGGIVEKEAAIQVSNVAIFNAAGKA

b0170 DRVGFVRVFFKSNSSETTINAIEVRKEQKKGASRRLRANKFPALIIYGGKEAAIELDHDQVMNMQAKVLTIVVDKEIKVKAQD  
BBp214 DRVGFVRVFFKSNSSETTITTYGIRTEKCGKASRRLRANKFPALIIHVLSLIESLQNDQFNIEMKEVLIIVDKYIVKIQE  
Bf131 DRVGFKIRIFKSNGLIIKAILRTEIKKSIIRKIRNGGCPAVIYNKNKSNVQLSNKDLSPENNVKQILINFTITAKIQD  
bu232 DRVGFVRVFFKSTGKTTLQAEATREKKGTSRRLRHNKFPALVYGVKKTLLILDHNTTFNLQKKNLLCQVKYKVKVQA  
BUsg22 DRVGFVRVFFKSNKKTIVKAEIRDKKGKSF SRKLRREDKQVIVPAIVYGGSEESIILNHDNLVFNLQKKTLLIKKTYTVKVA  
HI0914 DRVGFVRVFFKSNSNEIKFNAEVRTAQKKGASRRLRNGQIPAVYGGSEESIILNHDNLVFNLQKKTLLIKKTYTVKVA  
PA3655 DRVGFKIRVFKSTQKPIILNAQVRSDLGKASRRLRAGLVPVAVYGGDKESVLELREIALLNENIALLNVGAKETVLLKA  
PM1985 DRVGFVRVFFKSNSNEIKFNAEVRQSQKKGASRRLRNGQIPAVYGGSEESIILNHDNLVFNLQKKTLLIKKTYTVKVA  
RSc140 SRVGIKTRVLKTTGAAKVFAFERSVQGTGASRRLRAGKTPALIIYGGAEELIELDHNLVFNLQKKTLLIKKTYTVKVA  
STM021 DRVGFVRVFFKSNSSETTINAIEVRKEQKKGASRRLRANKFPALIIYGGSEAAIELDHDQVMNMQAKVLTIVVDKEIKVKAQD  
STY024 DRVGFVRVFFKSNSSETTINAIEVRKEQKKGASRRLRANKFPALIIYGGSEAAIELDHDQVMNMQAKVLTIVVDKEIKVKAQD  
vc2259 DRVGFVRVFFKSNSNEIKFEAVLRTDLGKASRRLRAGYFPAIVYGGSEESIILNHDNLVFNLQKKTLLIKKTYTVKVA  
wbr31 DKVKFKYRIFKSNKGIILAEENRCKIGKGFSTRREKIPALIIYGGKGPVLELDQNIIFNLQKKTLLIKKTYTVKVA  
XAC142 ERVGFKLVRFRSSGEAEIKVERRADEGKASRRLRAGVIPAIVYGGSEESIILNHDNLVFNLQKKTLLIKKTYTVKVA  
XCC137 ERVGFKLVRFRSSGEAEIKVERRADEGKASRRLRAGVIPAIVYGGSEESIILNHDNLVFNLQKKTLLIKKTYTVKVA  
XF2579 DRVGFKLVRFRSTGVEQIKAQRRKDEGKASRRLRAGMIPAIIYGGQRSIQLNHEQIWLQKKTLLIKKTYTVKVA  
y3135 DRVGFVRVFFKSNSSETTINVEVRNDQKKGASRRLRANKFPALIIYGGSEESIILNHDNLVFNLQKKTLLIKKTYTVKVA  
YPO104 DRVGFVRVFFKSTSETTINVEVRNDQKKGASRRLRANKFPALIIYGGSEESIILNHDNLVFNLQKKTLLIKKTYTVKVA  
Z0181 DRVGFVRVFFKSNSSETTINAIEVRKEQKKGASRRLRANKFPALIIYGGKEAAIELDHDQVMNMQAKVLTIVVDKEIKVKAQD

b0170 VQRHPYKPKLQHIDFVRMAHKKAGGSTRNGRDSSEAKRLGVKRFGGESVLAGSIVRQRGTFKHAGANVCGCRDHTLFAKA  
BBp214 IQRHAFKSKLHIDFLKMAHKKAGGSSRNGRDSHSLKRLGVKHFGGETIRSGSIVRQRGTFKHAGANVCGCRDHTLFAKA  
Bf131 VQYHPYKSNLHIDFIHMAHKKAGGSTRNGRDSRGRKLRGVKHFGGELISAGTIVRQRGTFKHAGANVCGCRDHTLFAKA  
bu232 IQRHSFKSKLLHIDFLYMAHKKAGGSTRNGRDSNAQRLGVKCFGGQLISAGSIVRQRGTFKHAGANVCGCRDHTLFAKA  
BUsg22 IQRHAFKSKLHIDFIYMAHKKAGGSTRNGRDSNAQRLGVKCFGGELIPAGSIVRQRGTFKHAGANVCGCRDHTLFAKA  
HI0914 MQRHFFKPKLHIDDFKRMATKAGGSTRNGRDSSEAKRLGVKRFGGESVLAGSIVRQRGTFKHAGANVCGCRDHTLFAKA  
PA3655 LQRHPAKGFVMHADFLRMAHKKAGGSTRNGRDSSEAKRLGVKRFGGQAVKAGNIIIVRQRGTFKHAGYVGLGKDHHTLFAKA

PM1985 MQRHPFKPQLVHIDFQRMAHKKAGGSTRNGRDESEAKRLGVKRFGGESVLAGSI IVRQRGRTKPHAGSNVGMGRDHTLFLATA  
RSc140 FQLHPFKQLVHIDFQRMAHKKAGGSTRNGRDESEAKRLGVKRFGGESVLAGSI IIRQRGTRTHAGVNVGMGKDHTLFLALV  
STM021 VQRHAYKPKLTHIDFVRMAHKKAGGSTRNGRDESEAKRLGVKRFGGESVLAGSI IVRQRGRTKPHAGTNVCGCRDHTLFLAKA  
STY024 VQRHAYKPKLTHIDFVRMAHKKAGGSTRNGRDESEAKRLGVKRFGGESVLAGSI IVRQRGRTKPHAGTNVCGCRDHTLFLAKA  
vc2259 VQRHAYKPKVEHMDIRMAHKKAGGSTRNGRDESEAKRLGVKRFGGESVLAGSI IVRQRGRTKPHAGTNVIGIKDHTLFLALS  
wbr31 IQKHAFLKLI IHIDFIYMAHKKAGGSTRNGRDSIGKRLGVKLFGGQKAYPGNI IVRQRGRTKPHGKPNVCGCKDYSLYALK  
XAC142 MQRHPFKQLIMHIDFQRMAHKKAGGSTRNGRDSNPYLVGKIFGGQAI DAGNI IVRQRGTQFHPGAGVGLGRDHTLFLALV  
XCc137 MQRHPFKQLIMHIDFQRMAHKKAGGSTRNGRDSNPYLVGKIFGGQAI DAGNI IVRQRGTQFHPGAGVGLGRDHTLFLALV  
XF2579 LQRHPYRQLVMHVDVQRMAHKKAGGSTRNGRDSNPYLVGKIFGGQAI EAGNI IIRQRGTQFPHAGDGVGLGRDHTLFLALV  
y3135 VQRHAFKPKLTHIDFVRMAHKKAGGSTRNGRDESEAKRLGVKRFGGESVLAGSI IVRQRGRTKPHAGINVCGCKDHTLFLALA  
YPO104 VQRHAFKPKLTHIDFVRMAHKKAGGSTRNGRDESEAKRLGVKRFGGESVLAGSI IVRQRGRTKPHAGINVCGCKDHTLFLALA  
Z0181 VQRHPYKPKLQHIDFVRMAHKKAGGSTRNGRDESEAKRLGVKRFGGESVLAGSI IVRQRGRTKPHAGANVCGCRDHTLFLAKA

b0170 DGKVKFEVKKNRKFI SIEMSRVCQVTGKRPVGTGNNSHALNATKRRFLPNLHSHRFWVESEKRFVTLRVSAKGMRVIDKK  
Bbp214 QGKVKFEKKNRNTYVSI IMSKICQITGKKPITGNNSHAMNATKRRFFPNLHSHRFWNPKTKRFI IIRVSAKGMRNIDKL  
Bf131 SKGLLFEKLLQRRVLSI IMSRTCQITRKKPMNGNRSHAMNATKRRFIPNIHSHRFWIENKPKFIKLRISTKGRILVLDKL  
bu232 KGKVEFKKKKRTYINI IMSRCQITGKKRMI GNNSHALNATKRRFLPNIQYHRFWIPEEKRFIKLRI SAHGMRCIDKK  
BUsg22 KGKVEFKKKKRTYINI IVMSRCQVTRKKRMI GNNSHAMNAKRRQFLPNIQYHRFWIPEEKRFIKLRI SAHGMRCIDKK  
HI0914 DGKVKFEVKKNRKYVSI IVMSRVCQVTGKRPVGTGNNSHAMNATKRRFLPNLHSHRFWVESEKRFVTLRLTAKGMRIIDKK  
PA3655 DGKVKFEVKKNRKYVSI IVMSRVCQVTGKRPVGTGNNSHALNATKRRFLPNLHSHRFWVESEKRFVTLRVSAKGMRVIDKK  
PM1985 DGKVKFEVKKNRKYVSI IMSRVCQVTGKRPVGTGNNSHAMNATKRRFLPNLHSHRFWVESEKRFVTLRLTAKGMRIIDKK  
RSc140 DGHVKFATRGGKQFVDDVMMARVCQVTGKAPVGNNSHAMNATKRRFLPNLQNRFFWVESENRWVSLRVSNAGRLRIDKK  
STM021 DGKVKFEVKKNRKYVSI IVMSRVCQVTGKRPVGTGNNSHALNATKRRFLPNLHSHRFWVESEKRFVTLRVSAKGMRVIDKK  
STY024 DGKVKFEVKKNRKYVSI IVMSRVCQVTGKRPVGTGNNSHALNATKRRFLPNLHSHRFWVESEKRFVTLRVSAKGMRVIDKK  
vc2259 DGKVKFEVKKNRKFI SIEMSRVCQVTGKRPVGTGNNSHAMNATKRRFLPNLQNRFFWVESENRWVSLRVSNAGRLRIDKK  
wbr31 SGIVFFKKKKRTYINI IMSRCQITGKKRMI GNNSHALNATKRRFLPNIQYHRFWIPEEKRFIKLRI SAHGMRCIDKK  
XAC142 DGKVEFSTKKKRTYVSVMSRVCQVSGKRVQVTGNNSHAMNATKRRFLPNLHSHRFWVESENRWVSLRVSAHALRTIDKN  
XCc137 NGKVEFTTKKRTYVSVMSRVCQVSGKRVQVTGNNSHAMNATKRRFLPNLHSHRFWVESENRWVSLRVSAHALRTIDKN  
XF2579 DGTVAFSIKKKRRTYVSVMSRVCQVSGKRVQVTGNNSHAMNATKRRFLPNLHSHRFWVESENRWVSLRVSAHALRTIDKN  
y3135 DGKVKFEVKKNRKFI SIEMSRVCQVTGKRPVGTGNNSHAMNATKRRFLPNLHSHRFWVESEKRFVTLRVSAKGMRVIDKK  
YPO104 DGKVKFEVKKNRKFI SIEMSRVCQVTGKRPVGTGNNSHAMNATKRRFLPNLHSHRFWVESEKRFVTLRVSAKGMRVIDKK  
Z0181 DGKVKFEVKKNRKFI SIEMSRVCQVTGKRPVGTGNNSHALNATKRRFLPNLHSHRFWVESEKRFVTLRVSAKGMRVIDKK

b0170 IDTVLAEELRAKELREKSVEELNTELLNLLRQFNLRMQAASGQLQSHLLKQVRRDVARVKTLLNETQTRSAIGRLPKHK  
Bbp214 LNSLKIKKLHVEIKKTIKELNIELMNLLEQFNLTQLQHSAKKLLQSHLLQVRRNIAQVNTILAETQIKSSIIGRLPKHK  
Bf131 IEQFLSIVSFMNYNSNIDNLYVVLHVDLREYCKLRIQLKLGQFKVHLFKKLYEACIKLRLFKTQIRSSIGCIPKHK  
bu232 IETVIRKINNVFRRKKNKLDLYTELLQLLREQFNLRMQSASGKLLKQPHLLRKRVRNIAQVNTLLDSTQIKSAIGRLPKHK  
BUsg22 IELIIQEGIKFRKKNRQDLNIELLQLLREQFNLRMQSASGKLLKQPHLLRKRVRNIAQVNTLLDSTQIKSSIIGRLPKHK  
HI0914 IDAVLAEIRAQDLRTRKSVEELNAELVNLGQFQKLRMQATATGQLQQTHTQAKQVRRDIARVKTTLTETQVRSIARLPKHK  
PA3655 IEAVLADLRANELREKSVEELNTELLNLLRQFNLRMQAATGQLQSHLLKQVRRDVARVKTLLNETQTRSAIGRLPKHK  
PM1985 IDAVLADIRAQELRTRKSVEELNTELLNLLRQFNLRMQAASGQLQSHLLKQVRRDVARVKTLLNETQTRSAIGRLPKHK  
RSc140 IDEVLADLRASELRDKDVAAGLNLQELSELLKAQFGLRMQKATQQLQNTSOLKQVRRDIARVKTTLTETQVRSIARLPKHK  
STM021 IETVLSSELRAKELREKSVEELNTELLNLLRQFNLRMQAASGQLQSHLLKQVRRDVARVKTLLNETQTRSAIGRLPKHK  
STY024 IETVLSSELRAKELREKSVEELNTELLNLLRQFNLRMQAASGQLQSHLLKQVRRDVARVKTLLNETQTRSAIGRLPKHK  
vc2259 IDAVLVEIRAQDLREKSVEELNTELLNLLRQFNLRMQAATGQLQQTHTLKAQVRRDIARVKTTLTETQVRSIARLPKHK  
wbr31 IKKVMKIKIKNLRKKNKELNTELLNLLRQFNLRMQAAGNQLQHTHLLKEVRKKNLAYVKMLINETQIKSSIIGRLPKHK  
XAC142 IDAVLKELRRAEQLEKSADELKAHLTDLRKEQFSLRMQOVTGQLPKTHETRRVRREIARVKKHLLGSRVLRGLRGTQSRHR  
XCc137 IDAVLKELRRAEQLEKSADELKAHLTDLRKEQFSLRMQOVTGQLPKTHETRRVRREIARVKKHLLGSRVLRGLRGTQSRHR  
XF2579 IDAVLAEIRAQELREKSVEELNTELLNLLRQFNLRMQAASGQLQSHLLKQVRRNVARVKTLLNETQVRSIARLPKHK  
y3135 IETVLAIRAQELREKSVEELNTELLNLLRQFNLRMQAASGQLQSHLLKQVRRNVARVKTLLNETQVRSIARLPKHK  
YPO104 IETVLAIRAQELREKSVEELNTELLNLLRQFNLRMQAASGQLQSHLLKQVRRNVARVKTLLNETQVRSIARLPKHK  
Z0181 IDTVLAEELRAKELREKSVEELNTELLNLLRQFNLRMQAASGQLQSHLLKQVRRDVARVKTLLNETQTRSAIGRLPKHK

b0170 ATLLGLGLRRI GHTVEREDTPAIRGMINAVSFMVKVEMKDIHPYEEITASCSCNVMIKIRSTVGNLQVSCSKCHPFFGKQR  
Bbp214 ATLSGLGLRYI GHTVLRKNTPSVVRGMIKLLSFMLRINMKKIHPYFKINVTSCSCNNINIFSTLSNVQVSCSKCHPFFGQQR  
Bf131 ATLRGLGLRRI GHTVSKIDTPSVRGMINLVYMIQVPMKKNLHYPYVNI SASCSNVLIHVRSTLKNLQVSCDACHPFGYGTQR  
bu232 KTLIGLGLRYI GHTVIREDTPSIQGMVKKISYILKIQMKKIHPYKSIATATSCSNIIEIFSTINNLDICAKCHPFFGKQR  
BUsg22 KTLIGLGLRRI GHTVIRQDTPSIRGMIKIKSYILKIQMKKIHPYKSIATATSCSNIIEIFSTVNNLDICAKCHPFFGKQR  
HI0914 ATLRGLGLRRI GHTVIRQDTPSIRGMIKIKSYILKIQMKKIHPYKSIATATSCSNIIEIFSTVNNLDICAKCHPFFGKQR  
PA3655 ATLRGLGLRRI GHTVIRQDTPSIRGMIKIKSYILKIQMKKIHPYKSIATATSCSNIIEIFSTVNNLDICAKCHPFFGKQR  
PM1985 ACVKGGLGLRRI NHTVEVDTPENRGMINKAYLLRVEMKPGIHPYRVPVLFHDTSDVYFLIGSTATLQVSSASHPVGQR  
RSc140 ATLRGLGLRRI NHTVEVDTPENRGMINKAYLLRVEMKPGIHPYRVPVLFHDTSDVYFLIGSTATLQVSSASHPVGQR  
STM021 ATVRGLGLRRI NHTVEVDTPAVRGMINKVSYLVKIMKENTHYPYREVVFDQMSDFSFVTRSTIKIEVSSHPFYGTQK  
STY024 ATLLGLGLRRI GHTVEREDTPAVRGMVNAV SFMVKVEMKDIHPYRVPVLFHDTSDVYFLIGSTATLQVSSASHPVGQR  
vc2259 ATLLGLGLRRI GHTVEREDTPAVRGMVNAV SFMVKVEMKGIHPYEEITATSCSNIKTHSTVGNLQVSCSKCHPFFGKQR  
wbr31 ATLRGLGLRRI NHTVEVDTPCVRGMINKVSYLVKIMKENTHYPYRVPVLFHDTSDVYFLIGSTATLQVSSASHPVGQR  
XAC142 STLYGLGLRRI GHTVIRQNSPRLGMINISYLVKIKMKKIHPSLDILATSCSNIKIKSTIKLLDVCNKCHPFFGKQR  
XCc137 LSVRALGLNKLNDVRELKDSPOVRGLINTVHYLVKVEKMDNVHPYKDVVFDVDFKILTRSTMKVEISSASHPFGKHK  
XF2579 LSVHALGLNKLNDVRELKDSPOVRGLINTVHYLVKVEKMDNVHPYKDVVFDVDFKILTRSTMKVEISSASHPFGKHK  
y3135 LSVRALGLRKVSDMRKVNDTPQVRGLIKKVHYLVRIQMKPEIHPYREVVFDVDFKILTRSTMKVEISSASHPFGKHK  
YPO104 ATLLGLGLRRI GHTVEREDTPAVRGMVNAV SFMVKVEMKQGIHPYEQVTASCSCSNIKINSTVGNLQVSCSKCHPFFGKQR  
Z0181 ATLLGLGLRRI GHTVEREDTPAIRGMINAVSFMVKVEMKDIHPYEEITASCSCNVMIKIRSTVGNLQVSCSKCHPFFGKQR

b0170 DVATGGRVDRFNKRFMVAVQNKPTRSKRGMRRSHDALTAVLSVDKTSGEKHLRHHIADGYRGRKVIKLVSSAGTGHPY  
Bbp214 TSDTGGRIEKFHFRFMVAVQNKPTRSKRGMRRSHDYLKIPLSKDKLSEIHRHHIKNGYKGGKVIKLISSSGSKHY  
Bf131 IIDTGRVNLFRNKRFMVAVQNKPTRSKRGMRRSHALPITISVSKVSEIHRHHIMNGFYRGMVILYFSSTGNGHPY  
bu232 VIDTGRVERFVKRFRMVAQNKPTRSKRGMRRSHDSLTAPLSIDKFSGETHRHHIINNGYKGGKVIKLISSAGTGHPY  
BUsg22 IIDTGRVERFVKRFRMVAQNKPTRSKRGMRRSHDSLKEIILSKDKFSGEMHIRHHIADGYRGRKVIKLISSAGTGHPY  
HI0914 VVDTGGRVERFNRFRMVAQNKPTRSKRGMRRSHDALTAVLSVDKASGETHLRHHIADGYRGRKVIKLVSTAETGHPY  
PA3655 KTKSEGRVAGFRNKRFRMVAQNKPTRSKRGMRRSHDALTAVLSVDKASGETHLRHHIADGYRGRKVIKLVSTAETGHPY  
PM1985 QIANEGRASDFVNRVMVAVQNKPTRSKRGMRRSHDALTAVLSVDKASGETHLRHHIADGYRGRKVIKLVSTAETGHPY  
RSc140 IMDTAGRVEKFRQKFRMVAQNKPTRSKRGMRRSHDALTAVLSVDKASGETHLRHHIADGYRGRKVIKLVSTAETGHPY  
STM021 FDSSESAARFQKFRMVAQNKPTRSKRGMRRSHDALTAVLSVDKASGETHLRHHIADGYRGRKVIKLVSTAETGHPY  
STY024 VVDTGGRVERFNRFRMVAQNKPTRSKRGMRRSHDALTAVLSVDKTSGEKHLRHHIADGYRGRKVIKLVSSAGTGHPY  
vc2259 IVDTGGRVERFNRFRMVAQNKPTRSKRGMRRSHDALTAVLSVDKASGETHLRHHIADGYRGRKVIKLVSSAGTGHPY  
wbr31 KLNIIGRVSFKFRMVAQNKPTRSKRGMRRSHDIINHPVSDVSGEIHRLHCLKSGFYRGGKVIKLISSAGTGHPY  
XAC142 VIDTGGRIDKFRMVAQNSRVTSPRRGQRSHDALTAKLSTDPSTGEIHLRHHIADGYRGRKVIKLISSAGTGHPY

XCC137 VIDTGGRIDKFQKRYMAVQKSRVTPSRRGQRRSHDALTAKLSTDPSTSGEIHRLRHHIADGYYRGGKVIIRMISSAATGHFYT  
XF2579 LVDTSGRIDKFKRKYMAVQKSRVTPSRRGQRRSHDALTAKLSIDPSTSGEVHIRHHVADGYYRGGKVIIRLISADTGHFYT  
y3135 DVASGGVRDRFNKRFMVAVQKQNPTRSKRGMRRSHDALTALSVDKTSGETHLRHHIADGFYRGRKVIKLVSSAGTGHFYT  
YPO104 DVASGGVRDRFNKRFMVAVQKQNPTRSKRGMRRSHDALTALSVDKTSGETHLRHHIADGFYRGRKVIKLVSSAGTGHFYT  
Z0181 DVATGGVRDRFNKRFMVAVQKQNPTRSKRGMRRSHDALTAVLSVDKTSGEKHLRHHIADGYYRGRKVIKLVSSAGTGHFYT

b0170 TTKNKRTKPEKLELKKFDPVVRQHVYIYKEAKMKRTFQPSVLKRNRSHGFRARMATKNGRQVLARRAKGRARLTMPIKT  
BbP214 TTKNKKAPSKKIELKKYDPKIRKHVLYKEAKMKRTFQPSVLKRNRSHGFRARMATKNGRQVLARRAKGRARLTMPIKT  
Bf131 TTKNKRSHPKIKLKKFDPYIYKHHIYTEKMKRTYQPSVLKRNRSHGFRARMATKNGRQVLARRAKGRARLTMPIKT  
bu232 TTKNKRNTPDKLKLKYPVIRKHILYNEGKMKRTFQPSVLKRNRSHGFRARMATKNGRYILSRRRAKLRTRLTMPKIKT  
BÜsg22 TTKNKRNTPDKLKLKYPVIRKHILYNEGKMKRTFQPSVLKRNRSHGFRARMATKNGRYILSRRRAKLRTRLTMPKIKT  
HI0914 TDKNKRNMPKMEIKKFDPVVRKHVIYKEAKMKRTFQPSVLKRNRSHGFRARMATKNGRQVLARRAKGRKLSMPKIKT  
PA3655 TDKNKRTKPEKIEIKKYDPVVRQHVYIYKEAKMKRTFQPSVLKRNRSHGFRARMATKNGRQVLARRAKGRKLSMPKIKT  
PM1985 TTKNKRNMPKMEIKKYDPVVRKHVYIYKEAKMKRTFQPSVLKRNRSHGFRARMATKNGRQVLARRAKGRKLSMPKIKT  
RSc140 TTKNKRTKPEKMEIMKFDPVARKHVAYKETMKRTYQPSVTRRKRTHGFRVPMKTRGGRAVLNARRAKGRKLSMPKIKT  
STM021 TTKNKRTKPEKLELKKFDPVVRQHVYIYKEAKMKRTFQPSVLKRNRSHGFRARMATKNGRQVLARRAKGRARLTMPIKT  
TY024 TTKNKRTKPEKLELKKFDPVVRQHVYIYKEAKMKRTFQPSVLKRNRSHGFRARMATKNGRQVLARRAKGRARLTMPIKT  
vc2259 TDKNKRNMPKGFIEIKKYDPVVRQHVYIYKEAKMKRTFQPSVLKRNRSHGFRARMATANGRQVLNARRAKGRKLSMPKIKT  
wbr31 TTKNKSHNLKIKLKKFDPYIYKHHIYNEAKMKRTFQPSVLKRNRSHGFRARMATKNGRQVLARRAKGRKLSMPKIKT  
XAC142 TDKNKRNTPGKMEMMKYDPVVRKHVYIYKEAKMKRTFQPSNLKRNRSHGFRARMATADGRKILARRAKGRKLSMPKIKT  
XCC137 TDKNKRNTPGKMEMMKYDPVVRKHVYIYKEAKMKRTFQPSNLKRNRSHGFRARMATADGRKILARRAKGRKLSMPKIKT  
XF2579 TDKNKRNTPGKLEFKKYDPVVRHHVIYKEAKMKRTFQPSNLKRNRSHGFRARMATADGRKILARRAKGRKLSMPKIKT  
y3135 TTKNKRTKPEKLELKKFDPVVRQHVYIYKEAKMKRTFQPSVLKRNRSHGFRARMATKNGRQVLARRAKGRARLTMPIKT  
YPO104 TTKNKRTKPEKLELKKFDPVVRQHVYIYKEAKMKRTFQPSVLKRNRSHGFRARMATKNGRQVLARRAKGRARLTMPIKT  
Z0181 TTKNKRTKPEKLELKKFDPVVRQHVYIYKEAKMKRTFQPSVLKRNRSHGFRARMATKNGRQVLARRAKGRARLTMPIKT

b0170 VRGAAKRFFKKGKGFPHKHANLRLHILTKKATKRKRHLRPKAMVSKGDLGLMKVRSVVKLCKCKIVKRDGVIIRVCEPKHK  
BbP214 LRSAAKRFFKESGKFKRQAHRLHILTKKNTYKRHLRSPKMISSKDIQKMKVRTSVKLLCCKIVKRNVRVIRVCEPKHK  
Bf131 SRSASAKRFRSSNKYKFKHAYARHILTKKSTKHKRHLRISILSKKNRKMVRSVVKMCCFIKRRNVIRVVCTPKHK  
bu232 LKSAAKRFFKIASGKFKRQANLRLHILTKKTTTKKRHLRPKILVSTGDMRDMKVQASVVKVLCCKIKRNNVVRVIRVCEPKHK  
BÜsg22 LRSAAKRFFKASGKFKRQANLRLHILTKKTTTKKRHLRPKILVSKGDIKSKVKVASVVKVLCCKIVKREGVVRVIRVCEPKHK  
HI0914 VRGAAKRFFKASGGFKRQSHLRLHILTKKTTTKKRHLRHLRHSMAKADQVLMKVRASVVKMCCCKIVKREGVVRVIRVCEPKHK  
PA3655 KSGAAKRFFKTAGGLKHKHAFKSHILTKMTTKRKRQLRGTSMNLKSDVARMKVLASLQAKQVVRKGRGLVVICNPRFK  
PM1985 VRGAAKRFFKASGGFKRQSHLRLHILTKKTTTKKRHLRHLRHSMAKADQVLMKVRASVVKLCKCKIVKREGVVRVIRVCEPKHK  
RSc140 KKSASAKRFTAPGGTIKRGQAFKRHLILTKKTTTKNKRLRGTGEGVHETNLKSMKVLASVVKRICKKIVKREGVVRVIRVCEPKHK  
STM021 VRGAAKRFFKKGKGFPHKHANLRLHILTKKATKRKRHLRPKAMVSKGDLGLMQVLSLNRNAKQIVKRRKGRGLVVICNPRFK  
TY024 VRGAAKRFFKKGKGFPHKHANLRLHILTKKATKRKRHLRPKAMVSKGDLGLMQVLSLNRNAKQIVKRRKGRGLVVICNPRFK  
vc2259 NKGAAKRFKKTAGGIKYKHATKRHLILTKRTTKNKRLRPNAILPKCELAAMKVRASVVKICKKIVKREGVVRVIRVCEPKHK  
wbr31 IRSVCKRFFKSCNFKYKKNLRLHILTKKSTTKRKRHLRISLFSATKGDKLVKVRTSVRKLCKCKIVKRNVRVIRVCEPKHK  
XAC142 NRAAAKRFKASGKYKCGHANRSHILTKKATKRKRHLRHLRHSMAKADQVLMKVRASVVKLCKCKIVKREGVVRVIRVCEPKHK  
XCC137 NRAAAKRFKASGKYKCGHANRSHILTKKATKRKRHLRHLRHSMAKADQVLMKVRASVVKLCKCKIVKREGVVRVIRVCEPKHK  
XF2579 NRAAAKRFKASGKYKAGHANRSHILTKKATKRKRHLRHLRHSMAKADQVLMKVRASVVKLCKCKIVKREGVVRVIRVCEPKHK  
y3135 VRGAAKRFFKANGGFKRKHANLRLHILTKKATKRKRHLRHLRHSMAKADQVLMKVRASVVKLCKCKIVKREGVVRVIRVCEPKHK  
YPO104 VRGAAKRFFKANGGFKRKHANLRLHILTKKATKRKRHLRHLRHSMAKADQVLMKVRASVVKLCKCKIVKREGVVRVIRVCEPKHK  
Z0181 VRGAAKRFFKKGKGFPHKHANLRLHILTKKATKRKRHLRPKAMVSKGDLGLMKVRSVVKLCKCKIVKRDGVIIRVCEPKHK

b0170 QRQMTESFAQLFEESLKEIETPGSIVRGVVAIDKDVVLVDAGLKSESAIPAEQFKNVAGDEVDAVALDAVEDGFGETLLS  
BbP214 QRQMTESFAQLFEESLKNITPGSIIQGTVAITKDTILVDAKLKSESIPIDQFKNSVGDQIDVALDAIEDGFGETLLS  
Bf131 QRQMIESFAQLFEESLKKTTQSGSIVQGVVAISKEIIVLVDAGLKSESAIPINQFVNSVDYIDVLDVAIVEDGFGETLLS  
bu232 QRQMNESFAQLFEESLKEIETPGSIRGTIVSIEKDMVLVDAGLKSESAIPVEQFQNSVGDQIDVALDAIEDGFGETLLS  
BÜsg22 QRQMNESFAQLFEESLKEIETPGSIRGTIVSIEKDIIVLVDAGLKSESAIPVEQFKNVAGDEVDAVALDAIEDGFGETLLS  
HI0914 QRQMSQFAQLFEESLKVLETTQGSIVSGTVVAIQKGFVLVDAGLKSESAIPVAEFLNAVGDVTVNVALDAVEDGFGETLLS  
PA3655 CVQMSQFAELFEESLSLDMPGAIIITGIVVDIDGDVTVHAGLKSSEGVIPVEQFYNEVGDVHVALDAVEDGFGETLLS  
PM1985 QRQMTESFAQLFEESLKELETTQGSIVSGTVVAIQKGFVLVDAGLKSESAIPVEEFLNAVGDVTVNVALDAVEDGFGETLLS  
RSc140 QRQTNESFAALFEESLARSINMAGEVISAENVIDHNFVVMVAGLKSSEAFVPEEFLNDVGDVYSVAIDALENGFGETLLS  
STM021 AVQMTESFAQLFEESLKEIETPGSIVRGVVAIDKDVVLVDAGLKSESAIPAEQFKNVAGDEVDAVALDAVEDGFGETLLS  
TY024 AVQMTESFAQLFEESLKEIETPGSIVRGVVAIDKDVVLVDAGLKSESAIPAEQFKNVAGDEVDAVALDAVEDGFGETLLS  
vc2259 QRQMTESFAQLFEESLNETQFQGTIVKGTVVAIENGTVLVDAGLKSESAIPAEQFKNVAGDEVDAVALDAVEDGFGETLLS  
wbr31 QRQMTESFARLFEESLKKIQTTPGSLVKGTVIAILKDIIVLVDAGLKSESAIPVEQFLNVDVGDVITVLDVAIEDGFGETLLS  
XAC142 ARQMTESFAELFEASQANLAKPGSIVTGTVEVRGDVVVINAGLKSSEGIVPVEQFRNDVGDQVQVALDSIENGFGFETLLS  
XCC137 ARQMTESFAELFEASQANLAKPGSIVTGTVEVRGDVVVINAGLKSSEGIVPVEQFRNDVGDQVQVALDSIENGFGFETLLS  
XF2579 ARQMTESFAELFEASQANLAKPGSIVTGTVEVRGDVVVINAGLKSSEGIVPVEQFRNDVGDQVQVALDAIEDGFGETLLS  
y3135 QRQMIESFAQLFEESLKTIEETPGSIVRGVVVIDKDIIVLVDAGLKSESAIPAEQFKNVAGDEVDAVALDAVEDGFGETLLS  
YPO104 QRQMIESFAQLFEESLKTIEETPGSIVRGVVVIDKDIIVLVDAGLKSESAIPAEQFKNVAGDEVDAVALDAVEDGFGETLLS  
Z0181 QRQMTESFAQLFEESLKEIETPGSIVRGVVAIDKDVVLVDAGLKSESAIPAEQFKNVAGDEVDAVALDAVEDGFGETLLS

b0170 REKAKRHEAWITLEKAYEDAETVTGVINGKVKGGFTVELNGIRAFPLPGSLVDVVRPVRTLHLEKLEFEKVIKLDQKRN  
BbP214 REKAKRHEAWITLEKAYEKDSTVTVGLINGKVKGGFTVELEDIRAFPLPGSLVDVVRPVRTLHLEKLEFEKVIKLDQKRN  
Bf131 REKAKRHEAWITLEKAYEQEVTVTVGVINGKVKGGFTVELNGIRAFPLPGSLVDVVRPVRTLHLEKLEFEKVIKLDQKRN  
bu232 REKAKRHEAWITLEKAYEKDSTVTVGLINGKVKGGFTVELEDIRAFPLPGSLVDVVRPVRTLHLEKLEFEKVIKLDQKRN  
BÜsg22 REKAKRHEAWITLEKAYEKDSTVTVGLINGKVKGGFTVELNEIRAFPLPGSLVDVVRPVRTLHLEKLEFEKVIKLDQKRN  
HI0914 REKAVRHESWIELEKAYEEKATVIGLITGKVKGGFTVELNGVRAFPLPGSLVDVTRPAREADHLLGKLEFEKVIKLDQKRN  
PA3655 REKAKRAESWIVLEAFAADEVVKGVINGKVKGGFTVDVNGIRAFPLPGSLVDVVRPVRTLHLEKLEFEKVIKLDQKRN  
PM1985 REKAVRHESWIELEKAYEEQATVIGLITGKVKGGFTVELNGVRAFPLPGSLVDVTRPAREADHLLGKLEFEKVIKLDQKRN  
RSc140 RDKARLASWLNLEKALESEIISGTVTKVKGGLTVMVNGIRAFPLPGSLVDVVRPVRTLHLEKLEFEKVIKLDQKRN  
STM021 REKAKRHEAWITLEKAYEDAETVTGVINGKVKGGFTVELNGIRAFPLPGSLVDVVRPVRTLHLEKLEFEKVIKLDQKRN  
TY024 REKAKRHEAWITLEKAYEDAETVTGVINGKVKGGFTVELNGIRAFPLPGSLVDVVRPVRTLHLEKLEFEKVIKLDQKRN  
vc2259 REKAKRHEAWITLEKAYEEAATVIGLITGKVKGGFTVELNGIRAFPLPGSLVDVVRPVRTLHLEKLEFEKVIKLDQKRN  
wbr31 REKAKRHEAWITLEKAYEEAATVIGLITGKVKGGFTVELNGIRAFPLPGSLVDVVRPVRTLHLEKLEFEKVIKLDQKRN  
XAC142 REKAKRAMVWDELEEALEKNETITGRISGKVKGGFTVDIKDVRAFPLPGSLVDVVRPVRTPAYLEKLEFEKVIKLDQKRN  
XCC137 REKAKRAMVWDELEEALEKNETITGRISGKVKGGFTVDIKDVRAFPLPGSLVDVVRPVRTPAYLEKLEFEKVIKLDQKRN  
XF2579 REKAKRSMVWDELEEALEKNETISGRINGKVKGGFTVDIKDVRAFPLPGSLVDVVRPVRTPAYLEKLEFEKVIKLDQKRN  
y3135 REKAKRHEAWITLEKAYEEAATVTVGVINGKVKGGFTVELNGIRAFPLPGSLVDVVRPVRTLHLEKLEFEKVIKLDQKRN  
YPO104 REKAKRHEAWITLEKAYEEAATVTVGVINGKVKGGFTVELNGIRAFPLPGSLVDVVRPVRTLHLEKLEFEKVIKLDQKRN  
Z0181 REKAKRHEAWITLEKAYEDAETVTGVINGKVKGGFTVELNGIRAFPLPGSLVDVVRPVRTLHLEKLEFEKVIKLDQKRN

b0170 VVVSRRAVIESENSAERDQLEENLQEGMEVKGIVKNLTDYGAFVDLGGVDGLLHITDMAWKRVKHPSEIVNVGDEITVKV  
BBp214 VVVSRRAVIESEYNAERNLLETQLQEGVIGVKNLTDYGAFVDLGGVDGLLHITDMAWKRVKHPSEIVNI GDEVKIKI  
Bf131 VVVSRRAAIEFEHSAERDQLLHKLHEGIIKGVVKNLTDYGAFIDLGGIDGLLHITDIAWKRVKHPSDIISIGDEISVKV  
bu232 VVVSRRAVIESENSAERDQLEENLQEGMHVKGIVKNLTDYGAFVDLGGVDGLLHITDMAWKRVKHPSEIVNVGDEINIKI  
BUsg22 VVVSRRAVIESENSAERDQLLESLOQEGIEIKGVKNLTDYGAFVDLGGVDGLLHITDMAWKRVKHPSEIVNVGDEINVKI  
HI0914 VVVSRRAVIESENSQEREQVLENLVEGSEVKGIVKNLTDYGAFVDLGGVDGLLHITDMAWKRVKHPSEIVNVGDEVTVKV  
PA3655 VVVSRRSRLAENSAEREALESLOQEGQVKGIVKNLTDYGAFVDLGGVDGLLHITDMAWKRVKHPSEIVNVGDEIDVKV  
PM1985 VVVSRRAVIESENSQEREQILENLQEGSEVKGIVKNLTDYGAFVDLGGVDGLLHITDMAWKRVKHPSEIVNVGDEITVKV  
RSc140 VVLSRRAVVEATLGEERQKLMETLKEGAVNGIVKNITDYGAFVDLGGIDGLLHITDLAWRRVRHPSEVLSVQGEITAKI  
STM021 VVVSRRAVIESENSAERDQLEENLQEGMEVKGIVKNLTDYGAFVDLGGVDGLLHITDMAWKRVKHPSEIVNVGDEINVKV  
STY024 VVVSRRAVIESENSAERDQLEENLQEGMEVKGIVKNLTDYGAFVDLGGVDGLLHITDMAWKRVKHPSEIVNVGDEINVKV  
vc2259 VVVSRRAVIESESSVERDELLETQLQEGTEVKGIVKNLTDYGAFVDLGGVDGLLHITDMAWKRVKHPSEIVNVGDEILVKV  
wbr31 VVVSRRAVIESENSAERDHLILKILQEGSKAVGVVKNLTDYGAFIDLGGVDGLLHITDMAWKRVKHPNEIVSIGDEITVKI

b0170 LKFDRETRVSLGLKQLGEDPWVAIAKRYPEGTCLTGRVTNLTDYGCFFEIEEGVEGLVHVSEMDWTNKNIHPSKVVNVG  
BBp214 LKFDREKIRVSLGLKQLSDDPWTKISERYPEKTKITGRVTNLTDYGCFFEIEEGVEGLVHVSEMDWTNKNIHPSKVMQVN  
Bf131 LKFDRETRVSLGLKQLLEDDPWSIVRNYPEKTKITGKVTNLTDYGCFFIEIAGGVEGLVHISEMDWTNKNIHPSKVVVEG  
bu232 LKFDRETRVSLGLKQLGEDPWVAIAKRYPEGTCLTGRVTNLTDYGCFFEIEEGVEGLVHVSEMDWTNKNIHPSKVVTVN  
BUsg22 LKFDKERTVSLGLKQLGEDPWVAIAISNRYPEGIKLSGRVTNLTDYGCFFEIEEGVEGLVHVSEMDWTNKNIHPSKVVAVN  
HI0914 LKFDKDRTRVSLGLKQLGQDPWAAIAENHPVNSKLTGKVTNLTDYGCFFEILDGVEGLVHVSEMDWTNKNIHPSKVVSLG  
PA3655 LKFDRETRVSLGLKQLGEDPWVAIAKRYPEGTCLTGRVTNLTDYGCFFAELEEGVEGLVHVSEMDWTNKNIHPSKVVQVG  
PM1985 LKFDKDRTRVSLGLKQLGQDPWVAIAENHPVNSKLSGKVTNLTDYGCFFEILDGVEGLVHVSEMDWTNKNIHPSKVVSLG  
RSc140 LKFDQEKNRVSLGVKQLGEDPWVGSRRYPQGTCLTGRVTNLTDYGCFFVEIEAGIEGLVHVSEMDWTNKNVAPSKVVQLG  
STM021 LKFDRETRVSLGLKQLGEDPWVAIAKRYPEGTCLTGRVTNLTDYGCFFEIEEGVEGLVHVSEMDWTNKNIHPSKVVNVG  
STY024 LKFDRETRVSLGLKQLGEDPWVAIAKRYPEGTCLTGRVTNLTDYGCFFEIEEGVEGLVHVSEMDWTNKNIHPSKVVNVG  
vc2259 LKFDRETRVSLGLKQLGEDPWVAIAKRYPEGHKLSGRVTNLTDYGCFFEIEEGVEGLVHVSEMDWTNKNIHPSKVVNVG  
wbr31 LKFDRETRVSLGLKQLGQDPWVIEISKRYPEBNVKISGKVTNLTDYGCFFEIEEGVEGLVHISEMDWTNKNIHPSKVVNVG  
XAC142 LKFDRETRVSLGLKQLGEDPWVNIARRYPANSRVFGKVSNTDYGAFVEIEPGVEGLVHVSEMDWTNKNVNP SKVVQVG  
XCC137 LKFDRETRVSLGLKQLGEDPWVNIARRYPANSRVFGKVSNTDYGAFVEIEPGVEGLVHVSEMDWTNKNVNP SKVVQVG  
XF2579 LKFDRETRVSLGLKQLGEDPWVNIARRYPANSRVFGKVSNTDYGAFVEIEAGVEGLVHVSEMDWTNKNVNP SKVVQVG  
y3135 LKFDRETRVSLGLKQLGEDPWVAIAKRYPESTKLTGRVTNLTDYGCFFEIEEGVEGLVHVSEMDWTNKNIHPSKVVNVG  
YPO104 LKFDRETRVSLGLKQLGEDPWVAIAKRYPESTKLTGRVTNLTDYGCFFEIEEGVEGLVHVSEMDWTNKNIHPSKVVNVG  
Z0181 LKFDRETRVSLGLKQLGEDPWVAIAKRYPEGTCLTGRVTNLTDYGCFFEIEEGVEGLVHVSEMDWTNKNIHPSKVVNVG

b0170 DVVEVMVLDIDEERRISLGLKQCKANPWQFAETHNKGDREVEGKIKSITDFGIFIGLDGGIDGLVHLSDISWNVAGEEA  
BBp214 SVVKMILDDIDEERRISLGLKQCKNPNWMEFSSKYNKGSVVGKIKSITDFGIFIGLEGGIDGLVHLSDISWNVAGEEA  
Bf131 ECIEVMVLDIDEERRISLGLKQCKVNPWQRFSSQIYARGDRVTGRKIKSITDFGIFIGLEGGIDGLVHLSDIASVSNNEL  
bu232 DVVEVMVLDIDEERRISLGLKQCKINPWQFSETHKKGIVHVGKIKSITDFGIFIGLNGGIDGLVHLSDISWNVAGEEA  
BUsg22 NIVDVLDDIDEERRISLGLKQCKINPWQFSETHKKGIVHVGKIKSITDFGIFIGLNGGIDGLVHLSDISWNVAGEEA  
HI0914 DTVEVMVLEIDEERRISLGLKQCKANPWQFADTHNKGDVTKGKIKSITDFGIFIGLEGGIDGLVHLSDISWNVAGEEA  
PA3655 DEVEVQVLDIDEERRISLGLKQCKSNPWQFSSQFNKGDRIKSGTISITDFGIFIGLDGGIDGLVHLSDISWNVAGEEA  
PM1985 DVVEVMVLDIDEERRISLGLKQCKNPNWQFAETHNKGDREVEGKIKSITDFGIFIGLDGGIDGLVHLSDISWNVAGEEA  
RSc140 DEVEVMVLDIDEERRISLGMKQCKANPWQFARNHKKGDLAGQIKSITDFGVFGLPGGIDGLVHLSDSLWQETGEEA  
STM021 DVVEVMVLDIDEERRISLGLKQCKSNPWQFAETHNKGDREVEGKIKSITDFGIFIGLDGGIDGLVHLSDISWNVAGEEA  
STY024 DVVEVMVLDIDEERRISLGLKQCKSNPWQFADTHNKGDREVEGKIKSITDFGIFIGLDGGIDGLVHLSDISWNVAGEEA  
vc2259 DEVEVMVLDIDEERRISLGLKQCKANPWQFSAEAQAKGDVTKGKIKSITDFGIFIGLEGGIDGLVHLSDISWNVAGEEA  
wbr31 DTNVVLDIDEERRISLGLKQCKPNPWQFSETHKKGIVHVGKIKSITDFGIFIGLEGGIDGLVHLSDISWNVAGEEA  
XAC142 DEVEVMVLDIDEERRISLGMKQVAANPWQFALHKKNDKRVSGQIKSITDFGIFIGLDGGIDGLVHLSDISWNTTGEDV  
XCC137 DEVEVMVLDIDEERRISLGMKQVAANPWQFALHKKNDKRVSGQIKSITDFGIFIGLDGGIDGLVHLSDISWNTTGEDV  
XF2579 DEVEVMVLDIDEERRISLGMKQVAANPWQFALHKKNDKRVSGQIKSITDFGIFIGLDGGIDGLVHLSDISWNTTGEDV  
y3135 DVVEVMVLDIDEERRISLGLKQCKSNPWQFAETHNKGDREVEGKIKSITDFGIFIGLDGGIDGLVHLSDISWNVAGEEA  
YPO104 DVVEVMVLDIDEERRISLGLKQCKSNPWQFAETHNKNDREVEGKIKSITDFGIFIGLDGGIDGLVHLSDISWNVAGEEA  
Z0181 DVVEVMVLDIDEERRISLGLKQCKANPWQFAETHNKGDREVEGKIKSITDFGIFIGLDGGIDGLVHLSDISWNVAGEEA

b0170 VREYKKGDEIAAVVLQVDAERERISLGVKQLAEDPFNNWVALNKKGAIITGKVTAVDAKTVELADEGYLRASEASRSVGD  
BBp214 VKYKKGDEIAAVVLQVDPDRERISLGIKQLQEDPFPAKYVSSHKGSLSVGTIKKIDNNVSLSEDGLIKPLNISDKIGE  
Bf131 ISQYKKGDEIAAVVLQVDSERERISLGIKQLQEDPFPAKYVSSHKGSLSVGTIKKIDNNVSLSEDGLIKPLNISDKIGE  
bu232 VVKYKKNDEIAAVVLQVDAERERISLGIKQLQEDPFNTYIANHKKGAIITGKIKSLDKKIVKLPEEGVIKLTEITRKIED  
BUsg22 VKNYKKGDEIAAVVLQVDAERERISLGIKQLQEDPFNNVYVSNHKKGAIITGKIKKDFDKTKVLSDEGNIKRFSDDSRKIDD  
HI0914 VRQYKKGDEIAAVVLQVDAVAKERISLGIKQLQEDPFNNFVAIINKKGAVVSAVVEADAKKVELADEGYLRASEASRSVGD  
PA3655 VRRFKKGDELETVILSVDPERERISLGIKQLQEDPFNNYASLHEKGSIVRGTVKEVDAKVISLGDGILKASEISRKEGE  
PM1985 VRQYKKGDEIAAVVLQVDAVAKERISLGIKQLQEDPFNNFVAIINKKGAVVSAVVEADAKKVELADEGYLRASEASRSVGD  
RSc140 VRKYKKGDEIAAVVLQVDAERERISLGIKQLQEDPFNNFVAIINKKGAVVSAVVEADAKKVELADEGYLRASEASRSVGD  
STM021 VREYKKGDEIAAVVLQVDAERERISLGVKQLAEDPFNNWVALNKKGAIITGKVTAVDAKTVELADEGYLRASEASRSVGD  
STY024 VREYKKGDEIAAVVLQVDAERERISLGVKQLAEDPFNNWVALNKKGAIITGKVTAVDAKTVELADEGYLRASEASRSVGD  
vc2259 VREFKKGDEIAAVVLQVDAERERISLGIKQMEDPFNNYVSDNKKGALVNGTVTAVDAKTELEDEGYLRASEASRSVGD  
wbr31 VKEYKKGDIISAMVLQVDSRERISLGIKQLQEDPFNNYVYVKNKIGDIVDGTISIIEKSKFVIKLSFVEGYVNIADKISN  
XAC142 VRNYKKGDTLEAVVLQVDPERERISLGVKQLQEDPFQYMASNPKGSKVEGVVREVDAKTIDLADEGYVAARDIANKVG  
XCC137 VRNYKKGDTLEAVVLQVDPERERISLGVKQLQEDPFQYMASNPKGSKVEGVVREVDAKTIDLADEGYVAARDIANKVG  
XF2579 VRNFKKGDTLETVVLAVDPERERISLGVKQLQEDPFQYMATHPKGSKIVGTVEVDAKTELEDEGYVSARDIANKVG  
y3135 VREYKKGDEIAAVVLQVDAERERISLGVKQLAEDPFNNYVSNKKGAIITGKVTAVDAKTVELADEGYLRASEASRSVGD  
YPO104 VREYKKGDEIAAVVLQVDAERERISLGVKQLAEDPFNNYVSNKKGAIITGKVTAVDAKTVELADEGYLRASEASRSVGD  
Z0181 VREYKKGDEIAAVVLQVDAERERISLGVKQLAEDPFNNWVALNKKGAIITGKVTAVDAKTVELADEGYLRASEASRSVGD

b0170 EVEAKFTGVRDKNRAISLSVRAKAMAEAFKVSMDMLKAGVHFGHQTRYWNPCKMPPIFGARNKVHIINLEKTPMNFNA  
BBp214 IVEVKLNSIDKKERIIYLSILEKAMTEAFKVSMDMLNAGVHFGHQTRYWNPCKMPPIFGARNKVHIINLEKTPMNFNA  
Bf131 IQSKIEGIDRKNRINLSYNDVMI EAFKLSMREMLKAGVHFGHQTRYWNPCKMPPIFGIRNKIHIINLEKTPMNFNA  
bu232 KILVKLSSFDKRNRIIYLTIHMI VMTAEAFKVSMDMLKAGVHFGHQTRYWNPCKMPPIFGIRNRHIINLEKTPMNFNA  
BUsg22 TILVKISNFDKRNRIINLTFHILVMAEAFKVSMDMLKAGVHFGHQTRYWNPCKMPPIFGSRNKVHIINLEKTPMNFNA

HI0914 VVEAKYTGVDKRSRIVHLSVKAKAMAEAFKVSMDRMINAGVHFHGQTRYWNPQMKPFI FGARNVHI INLEKTLPLFNEA  
PA3655 VEAKIISIDRKSRLVLSVSKSITIGDLIRVNMDRMLKAGVHFHGQTRYWNPQMKGKFI FGARNKVI INLEKTLPLFNEA  
PM1985 VVEAKYTGVDKRSRIVHLSVRKAKAMAEAFKVSMDRMLQAGVHFHGQTRYWNPQMKPFI YGPRNGVHI INLEKTVPMFNEA  
RSc140 TMTAMVNIIDRKSRLNINVSIAKKNLGLALKVITMREMLEAGVHFHGQTRFVWNPQMAPFI FGHRNKIHI INLEKTLPMYLD  
STM021 DVEAKFTGVDKRNRAISLSVRKAKAMAEAFKVSMDRMLKAGVHFHGQTRYWNPQMKPFI INLEKTVPMFNEA  
STY024 DVEAKFTGVDKRNRAISLSVRKAKAMAEAFKVSMDRMLKAGVHFHGQTRYWNPQMKPFI FGARNKVI INLEKTVPMFNEA  
vc2259 KVEAKFTGVDKRNRAISLSVRKAKAMAEAFKVSMDRMLTAGVHFHGQTRYWNPQMKQFI FGARNRVI INLEKTVPMFNEA  
wbr31 ILLKLIIGIDRKNRTINLSFIIDVMTFAFKLSMKDMIQSGVHFHGQTRYWNPQMKPFI FCKKNKVI INLEKTLIMFEIA

XAC142 KIEAKFVGMDRKGRTLQLSIAKALLRAQLNVTMRQMLEAGVHFHGQTRYWNPQMAPYIFGARGKIHI INLEKTVPLFNDA  
XC137 KIEAKFVGMDRKGRTLQLSIAKALLRAQLNVTMRQMLEAGVHFHGQTRYWNPQMAPYIFGARGKIHI INLEKTVPLFNDA  
XF2579 SVEAKFVGMDRKGRTLQLSIAKALLREQLGVTMRQMLEAGVHFHGQTRYRHPKMSPNIFGARGKIHI INLEKTVPLFNDA  
y3135 EVEAKYTGVDKRNRAISLSVRKAKAMAEAFKVSMDRMLQAGVHFHGQTRYWNPQMKPFI FGARNKVI INLEKTVPMFNEA  
YP0104 EVEAKYTGVDKRNRAISLSVRKAKAMAEAFKVSMDRMLQAGVHFHGQTRYWNPQMKPFI FGARNKVI INLEKTVPMFNEA  
Z0181 EVEAKFTGVDKRNRAISLSVRKAKAMAEAFKVSMDRMLKAGVHFHGQTRYWNPQMKPFI FGARNKVI INLEKTVPMFNEA

b0170 LAELNKIASRKGKILFVGTKRAASEAVKDAALSCDQFFVNRHWLGGMLTNWKTVRQSIKRLKDLQTSQDGTDFDKLTKKE  
Bbp214 LFELKKISLRKGIKILFVGTQKASIKESAILCKQFFVNRHWLGGMLTNWKTVRQSIKRLKDLQTSQDGTDFDKLTKKE  
Bf131 LVELKKIALKGIKILFVGTKRATRESIKSTALICGQFFVNRHWLGGMLTNWKTVRQSIKRLKDLQTSQDGTDFDKLTKKE  
bu232 LSELKKIALKGRILFVGTKKAASKGIEVAINCEQFFVNRHWLGGMLTNWKTVRQSIKRLKDLQTSQDGTDFDKLTKKE  
BUsg22 LSELKKISLRKGIKILFVGTKRAASKIKETALNCNQFFVNRHWLGGMLTNWKTVRQSIKRLKDLQTSQDGTDFDKLTKKE  
HI0914 LAELTRIASNNGKVLVFGTKRAASEAVKAAALDCQYVNRHWLGGMLTNWKTVRQSIKRLKDLQTSQDGTDFDKLTKKE  
PA3655 LTFVVERLAAGKNKILFVGTKRASAGKIVREEAARCGMPYVDRHWLGGMLTNWKTVRQSIKRLKDLQTSQDGTDFDKLTKKE  
PM1985 LVELTRIASNNGKILFVGTKRAATEAVKAAALDCQYVNRHWLGGMLTNWKTVRQSIKRLKDLQTSQDGTDFDKLTKKE  
RSc140 LKYYVQLAANRGTILFVGTKRQSRILAEAAARAGMPYVDRHWLGGMLTNWKTVRQSIKRLKDLQTSQDGTDFDKLTKKE  
STM021 LAELNKISARKGKILFVGTKRAASEAVKAAALSCDQFFVNRHWLGGMLTNWKTVRQSIKRLKDLQTSQDGTDFDKLTKKE  
STY024 LAELNKISARKGKILFVGTKRAASEAVKAAALSCDQFFVNRHWLGGMLTNWKTVRQSIKRLKDLQTSQDGTDFDKLTKKE  
vc2259 LAELAKVGEKKGKILFVGTKRAASEAVKAAALSCQYVNRHWLGGMLTNWKTVRQSIKRLKDLQTSQDGTDFDKLTKKE  
wbr31 MNFLSKISKRDGKILFVGTKRAASEAVKAAALSCQYVNRHWLGGMLTNWKTVRQSIKRLKDLQTSQDGTDFDKLTKKE  
XAC142 MNFLSSIAQRGTVFLVGTKRASAREIKEEAERCNMPFMTQRWLGGLTNWKTVRQSVARLKELEAAETDGTDFDKLVKHE  
XC137 MNFLSSIAQRGTVFLVGTKRASAREIKEEAERCNMPFMTQRWLGGLTNWKTVRQSVARLKELEAAETDGTDFDKLVKHE  
XF2579 MNFLSAVAQRKRSVFLVGTKRASARDAIKEEAERCMPYMIQRWLGGLTNWKTVRQSVARLKELEAAETDGTDFDKLVKHE  
y3135 LAELTKISSRKGKILFVGTKRAASEAVKAAALSCDQFFVNRHWLGGMLTNWKTVRQSIKRLKDLQTSQDGTDFDKLTKKE  
YP0104 LAELTKISSRKGKILFVGTKRAASEAVKAAALSCDQFFVNRHWLGGMLTNWKTVRQSIKRLKDLQTSQDGTDFDKLTKKE  
Z0181 LAELNKIASRKGKILFVGTKRAASEAVKDAALSCDQFFVNRHWLGGMLTNWKTVRQSIKRLKDLQTSQDGTDFDKLTKKE

b0170 ALMRTRELEKLENSLGGIKDMGGLPDALFVIDADHEHIAIKEANLGI PVFAIVDTNSDPDGVDFVIPGNDDAIRAVTLY  
Bbp214 VLLRMRELSKLENSLGGIKEMGSLPDALFVIDADHEHIAIKEANLGI PVFISIVDTNSDPDGVDFIIPGNDDAIRAVNLY  
Bf131 VLILNRELISLENSLGGIKNMGGLPDALFTAGAEQEHIAIKEANSLGIPVFSIVDTNSDPDGI DFIIPGNDDAIRAINLY  
bu232 ALIRSTRFLKLENSLGGIKNMGGLPDCLFVIDAAHENIAITFANNLGI PVFISIVDTNSDPDGVDFIIPGNDDAIRAVNLY  
BUsg22 ALIRSTRFLKLENSLGGIKNMGGLPDCLFVIDAAHENIAITFANNLGI PVFAIVDTNSDPDGVDFIIPGNDDAIRAVTLY  
HI0914 ALMRSREMEKLELSLGGIKDMGGLPDALFVIDADHEHIAIVKEANLGI PVFAIVDTNSTPAGVDFVIPGNDDAIRAVTLY  
PA3655 ALMRSRDLEKLELSLGGIKDMGGLPDALFVIDADHEHIAITFANNLGI PVFISIVDTNSDPDGVDFIIPGNDDAIRAVQLY  
PM1985 ALMRTRELEKLENSLGGIKEMGGLPDALFVIDADHEHIAIVKEANLGI PVFAIVDTNSDPDGVDFIIPGNDDAIRAVTLY  
RSc140 ALMFEREMEKLEKSLGGIKDMGGLPDALFVIDADHEHIAIVTEAAKLGIPVIGVDTNSHSPGIDYVIPGNDDSSKAVALY  
STM021 ALMRTRELEKLENSLGGIKDMGGLPDALFVIDADHEHIAIKEANLGI PVFAIVDTNSDPDGVDFIIPGNDDAIRAVSLY  
STY024 ALMRTRELEKLENSLGGIKDMGGLPDALFVIDADHEHIAIKEANLGI PVFAIVDTNSDPDGVDFIIPGNDDAIRAVSLY  
vc2259 ALMRTREMEKLEKSLGGIKDMGGLPDALFVIDADHEHIAIKEANLGI PVFAIVDTNSDPDGVDFIIPGNDDAIRAVQLY  
wbr31 ALIRTRTLNLENSLGGIKNMGGLPDALFVIDVEHEKTSIKEANLGIPIFAIVDTNSNPKDKIFVIPGNDDAIRAVDLY  
XAC142 VLGLRREREKLDASLGGIKEMNRLPDALFVIDIGHEDIAIKEAKKLGIPVIAVDTNYDPAVLDYVIPGNDDAIRAVQLY  
XC137 VLGLRREREKLDASLGGIKEMNRLPDALFVIDIGHEDIAIKEAKKLGIPVIAVDTNYDPAVLDYVIPGNDDAIRAVQLY  
XF2579 VLRLRRESGLQASLGGIKDMNRPDALFVIDIGHEDIAIKEAKKLGIPVIAVDTNYDPSLDYVIPGNDDAIRAVQLY  
y3135 ALMRTRELEKLENSLGGIKDMGGLPDALFVIDADHEHIAIKEANLGI PVFISIVDTNSDPDGVDFIIPGNDDAIRAVKLY  
YP0104 ALMRTRELEKLENSLGGIKDMGGLPDALFVIDADHEHIAIKEANLGI PVFISIVDTNSDPDGVDFIIPGNDDAIRAVKLY  
Z0181 ALMRTRELEKLENSLGGIKDMGGLPDALFVIDADHEHIAIKEANLGI PVFAIVDTNSDPDGVDFIIPGNDDAIRAVTLY

b0170 LGAVAAVREGRMGQKVHPNGIRLGI VPKPNSTWFANEFADNLDSDFKVRQYLTKEKAKASVSRIVIERPKSIRVTIHTA  
Bbp214 LNAVSKVIAKKNVMGQKVHPNGMRLGIIKHNWSVWFANDFAKILDSYQVRLFLRKLKFKASVSRIVIERPKSIRVTIHTA  
Bf131 LNIVSNVICSDDEMGQKVHPNGMRLGIIKSHWSTWYANNFSNNLNNDFFVRFKLLGQSLKALVSRIVIERPKSIRVTIHTA  
bu232 LKSIMLTISKINMGQKVHPNGMRLGIIKHNWSVWFANDFADHLDSYKVRQFLMKTLEKASISRIIVIERPKSIRVTIHTA  
BUsg22 LQAVSLIICKNQMGQKVHPNGMRLGIIKHNWSVWFANDFADHLDSYKVRQFLMKTLEKASVSRIVIERPKSIRVTIHTA  
HI0914 LVAAAAAALKVGRMGQKVHPNGIRLGI VPKPNSTWFANDFADHLDSYKVRQFLMKTLEKASVSRIVIERPKSIRVTIHTA  
PA3655 LNSMAEAVIRGKMGQKVHPNGIRLGI VKEHTSVWYADNYADYLFADLKVREYLQDKLKSASVSRIVIERPKSIRVTIHTA  
PM1985 LSAAAAAVKVGRMGQKVHPNGIRLGI VKNWSTWFANDFADNLDGDFKVRQFLMKTLEKASVSRIVIERPKSIRVTIHTA  
RSc140 VRGVADAILVGRMGQKVHPNGIRLGI VKNWSTWFANDFADNLDGDFKVRQFLMKTLEKASVSRIVIERPKSIRVTIHTA  
STM021 LGAVAAVREGRMGQKVHPNGIRLGI VPKPNSTWFANEFADNLDSDFKVRQYLTKEKAKASVSRIVIERPKSIRVTIHTA  
STY024 LGAVAAVREGRMGQKVHPNGIRLGI VPKPNSTWFANEFADNLDSDFKVRQYLTKEKAKASVSRIVIERPKSIRVTIHTA  
vc2259 LNAAAQAINEGRMGQKVHPNGIRLGI VPKPNATWFANDFADNLDGDFKVRQYLTKEKAKASVSRIVIERPKSIRVTIHTA  
wbr31 LKTVSETIKNSKMGQKVHPNGIRLGI IKSWSSTWYANEFKSNLISDFKVRQFLMKTLEKASVSRIVIERPKSIRVTIHTA  
XAC142 ARAAADAVLEKGMGHKVPHTGIRLGI AKDWNKSWYANEFASYLAADLKVREMLRKKLAQAGVSKLIERPKTARVTIHTA  
XC137 ARAAADAVLEKGMGHKVPHTGIRLGI AKDWNKSWYASDFAAYLAADLKVREMLRKKLAQAGVSKLIERPKTARVTIHTA  
XF2579 ARAAADAVLEKGMGHKVPHTGIRLGI SADWNKSWYANEFAGYLAADLKVREMLRKKLAQAGVSKLIERPNTACVSMHVA  
y3135 LGAVATAVREGRMGQKVHPNGIRLGI VKNWSTWYANEFADNLDSDFKVRQYLTKEKAKASVSRIVIERPKSIRVTIHTA  
YP0104 LGAVATAVREGRMGQKVHPNGIRLGI VKNWSTWYANEFADNLDSDFKVRQYLTKEKAKASVSRIVIERPKSIRVTIHTA  
Z0181 LGAVAAVREGRMGQKVHPNGIRLGI VPKPNSTWFANEFADNLDSDFKVRQYLTKEKAKASVSRIVIERPKSIRVTIHTA

b0170 RPGIVIGKKGEDVEKLRKVVADIAGVPAQINIAEVRKPELDAKLVDASITSQLERRVMFRRAMKRAVQNAMRLGAKGKIKV  
Bbp214 RPGIVIGKKGEDVEKLRKLSITNITGVPTQINIAEIRKPELDAKLVDANIVSLERRIMFRRAMKRAVQNAMRQAGKIKV  
Bf131 RPGVIGKKGEDIKLRKREKVSISGVTPLNISEIRKPELDAKLVDANIVSLERRIMFRRAMKRAVQNAMRQAGKIKV  
bu232 RPGIVIGKKGEDIKLRKREKVSISGVTPLNISEIRKPELDAKLVDANIVSLERRIMFRRAMKRAVQNAMRQAGKIKV  
BUsg22 RPGIVIGKKGEDIKLRKREKVSISGVTPLNISEIRKPELDAKLVDANIVSLERRIMFRRAMKRAVQNAMRQAGKIKV  
HI0914 RPGIVIGKKGEDIKLRKREKVSISGVTPLNISEIRKPELDAKLVDANIVSLERRIMFRRAMKRAVQNAMRQAGKIKV  
PA3655 RPGIVIGKKGEDIKLRKREKVSISGVTPLNISEIRKPELDAKLVDANIVSLERRIMFRRAMKRAVQNAMRQAGKIKV  
PM1985 RPGIVIGKKGEDIKLRKREKVSISGVTPLNISEIRKPELDAKLVDANIVSLERRIMFRRAMKRAVQNAMRQAGKIKV  
RSc140 RPGVIGKKGEDIKLRKREKVSISGVTPLNISEIRKPELDAKLVDANIVSLERRIMFRRAMKRAVQNAMRQAGKIKV  
STM021 RPGIVIGKKGEDIKLRKREKVSISGVTPLNISEIRKPELDAKLVDANIVSLERRIMFRRAMKRAVQNAMRQAGKIKV  
STY024 RPGIVIGKKGEDIKLRKREKVSISGVTPLNISEIRKPELDAKLVDANIVSLERRIMFRRAMKRAVQNAMRQAGKIKV

vc2259 R P G V V I G K K G E D V E K L R A A V A K I A G V P A Q I N I A E V R K P E L D Q L V A D S I A S Q L E R R V M F R R A M K R A V Q N A M R L G A K G I K V  
wbr31 R P G I V I G R K G E D V D K L R K E I S N I T G V P A Q I S I T E I K R P E L D A K L V S E N I A S Q L E R R I M F R R A M K R A V Q N A I R L G A K G I K V  
XAC142 R P G V V I G K R G E D I E K L R K E V S E L M G V P A H I N V T E V R K P E L D A Q L V A E S I A Q Q L E R R I M F R R A M K R S V G N A M R L G A L G I K V  
XCC137 R P G V V I G K R G E D I E K L R K E V S E M M G V P A H I N V T E V R K P E L D A Q L V A E S I A Q Q L E R R I M F R R A M K R S V G N A M R L G A L G I K V  
XF2579 R P G V V I G K R G E D I E M L R K Q V S D I M G V S H I N V I E V R K P E L D A Q L V A E S V A Q Q L E R R I M F R R A M K R S V G N A M R L G A L G I K I  
y3135 R P G I V I G K K G E D V E K L R K V V A D I A G V P A Q I N I A E V R K P E L D A K L V A D S I T S Q L E R R V M F R R A M K R A V Q N A M R L G A K G I K V  
YPO104 R P G I V I G K K G E D V E K L R K V V A D I A G V P A Q I N I A E V R K P E L D A K L V A D S I T S Q L E R R V M F R R A M K R A V Q N A M R L G A K G I K V  
Z0181 R P G I V I G K K G E D V E K L R K V V A D I A G V P A Q I N I A E V R K P E L D A K L V A D S I T S Q L E R R V M F R R A M K R A V Q N A M R L G A K G I K V

b0170 E V S G R L G G A E I A R T E W Y R E G R V P L H T L R A D I D Y N T S E A H T T Y G V I G V K V W I F K G E I L M A R Y L G P K L K L S R R E G T D L F L K S  
Bbp214 E I S G R L G G T E I A R R E W Y R E G R V P L H T L R A D I E Y N V S E A H T T Y G V I G V K V W I F K G E I L M A K Y L G P K L K L C R R E N T D L F F K S  
Bf131 E V S G R L S G A E I A R T E W Y R E G R V P L H T F R A D I D Y S L S E A H T S Y G V V G V K V W I F K G E I L M A K Y V G P K L K L S R R E N T D L F L K S  
bu232 E V S G R L G G A E I A R R E W Y R E G R V P L H T L R A N I D Y S I S E A H T T Y G V I G V K V W I F K G E I L M A K Y L G P K L K L S R R E G T D L F L K S  
BUsG22 E V S G R L G G A E I A R R E W Y R E G R V P L H T L R A N I D Y S I S E A H T T Y G V I G V K V W I F K G E I L M A R Y L G P K L K L S R R E G T D L F L K S  
HI0914 E V S G R L G G A E I A R S E W Y R E G R V P L H T L R A D I D Y N T A E A H T T Y G V I G V K V W I F K G E I L M A R Y L G P K L K L S R R E G T D L F L K S  
PA3655 Q V S G R L G G A E I A R T E W Y R E G R V P L H T L R A D I D Y A T Y E A H T T Y G V I G V K V W I F K G E I M A R Y I G P C K L S R R E G T D L F L K S  
PM1985 E V S G R L G G A E I A R S E W Y R E G R V P L H T L R A D I D Y N T A E A H T T Y G V I G I K V W I F K G E I L M A R Y L G P K L K L S R R E G T D L F L K S  
RSc140 M S S G R L N G I E I A R T E W Y R E G R V P L H T L R A D I D Y G F S E A E T T Y G I G I G K V W I Y K G E V F M A R Y I G P T C K L A R R E G A D L S L K S  
STM021 E V S G R L G G A E I A R T E W Y R E G R V P L H T L R A D I D Y N T S E A H T T Y G V I G V K V W I F K G E I L M A R Y L G P K L K L S R R E G T D L F L K S  
STY024 E V S G R L G G A E I A R T E W Y R E G R V P L H T L R A D I D Y N T S E A H T T Y G V I G V K V W I F K G E I L M A R Y L G P K L K L S R R E G T D L F L K S  
vc2259 E V S G R L G G A E I A R S E W Y R E G R V P L H T L R A D I D Y A T S S A H T T Y G V I G V K V W I F K G E I L M A R Y L G P K L K L S R R E G T D L F L K S  
wbr31 E V S G R L G G A E I A R K E W Y R E G R V P L H T L R A D I D Y N T S E A H T T Y G I G V K V T I F K G E I L M A K Y L G P K L K L S R R E G T D L F L K S  
XAC142 N V A G R L N G A E I A R S E W Y R E G R V P L H T L R A D I D Y G F A E A S T T Y G I I G I K V W I Y K G E V F M A R Y I G P T C K L A R R E G A D L S L K S  
XCC137 N V A G R L N G A E I A R S E W Y R E G R V P L H T L R A D I D Y G F A E A S T T Y G I I G I K V W I Y K G E V F M A R Y I G P T C K L A R R E G A D L S L K S  
XF2579 S V A G R L N G A E I A R S E W Y R E G R V P L Q T L R A D I G Y G F S E A H T N Y G V T G V K V L I Y H D I F M A R Y I G P S C K L A R R E G A D L S L K S  
y3135 E V S G R L G G A E I A R T E W Y R E G R V P L H T L R A D I D Y N T S E A H T T Y G V I G V K V W I F K G E I L M A R Y L G P K L K L S R R E G T D L F L K S  
YPO104 E V S G R L G G A E I A R T E W Y R E G R V P L H T L R A D I D Y N T S E A H T T Y G V I G V K V W I F K G E I L M A R Y L G P K L K L S R R E G T D L F L K S  
Z0181 E V S G R L G G A E I A R T E W Y R E G R V P L H T L R A D I D Y N T S E A H T T Y G V I G V K V W I F K G E I L M A R Y L G P K L K L S R R E G T D L F L K S

b0170 V R A I D T E Q A P G Q H G A R K P R L S D Y G V Q L R E K Q K V R R I Y G V L E R Q F R N Y Y K E A A R L K G N T G E N L L A L L E G R L D N V V Y R M G F G  
Bbp214 I R A I D S D Q P P G Q H G S K R Q R L S D Y G V Q L R E K Q K V R R L Y G I L E A Q F R N Y Y K H A S R L K G N T G E N L L F L L E N R L D N V T Y R I G F G  
Bf131 I R S I D S D H A P G Q H S I R K S R L S D Y G V Q L R E K Q K V R M Y G I L E N Q F A N Y Y R K S A S M K G N T G E I L L Q L L E S R L D N V V Y R M G F G  
bu232 L R S I E S E Q P P G Q H G I R K P R L S D Y A I Q L R E K Q K V R R L Y G V L E R Q F K I Y Y K L A A S L K G N T G A N L L Q L L E S R L D N V V Y R M G F G  
BUsG22 F R S I D S E H P P G Q H G V R K P R L S D Y A I Q L R E K Q K V R R L Y G V L E R Q F R I Y Y K K A S R S K G N T G E N L L Q L L E R L D N V V Y R M G F G  
HI0914 V R A I D S D T A P G Q H G A R K P R L S D Y G S Q L R E K Q K V R R I Y G I L E R Q F R N Y Y K E A N R L K G N T G E N L L V L L E G R L D N V V Y R M G F A  
PA3655 A R A L D S E N V P G Q H G Q R R G R L S D Y G L Q L R E K Q K V R R I Y G V L E R Q F R G Y Y Q E A S R R K G S T G E N L L Q L L E C R L D N V V Y R M G F G  
PM1985 V R A I E S D T A P G Q H G A R K P R L S D Y G S Q L R E K Q K V R R I Y G I L E R Q F R N Y Y K E A N R L K G N T G E N L L V L L E G R L D N V V Y R M G F A  
RSc140 R R L A D D S K P G Q H G R T S A R T S D Y G V Q L R E K Q K V R R I Y G V L E R Q F R Y F A E A D R R K G N T G E N L L Q L L E S R L D N V V Y R M G F G  
STM021 V R A I D T E Q A P G Q H G A R K P R L S D Y G V Q L R E K Q K V R R I Y G V L E R Q F R N Y Y K E A A R L K G N T G E N L L A L L E G R L D N V V Y R M G F G  
STY024 V R A I D T G Q A P G Q H G A R K P R L S D Y G V Q L R E K Q K V R R I Y G V L E R Q F R N Y Y K E A A R L K G N T G E N L L A L L E G R L D N V V Y R M G F G  
vc2259 V R A I D T D N A P G V H G A R R G R L S E Y G V Q L R E K Q K V R R I Y G V L E K Q F R N Y Y K E A A R L K G N T G E N L L Q L L E G R L D N V V Y R M G F G  
wbr31 V R A I E S D H L P G Q H G S R R S R L S D Y G I Q L R E K Q K L R M Y V I L E R Q F K Y Y K K A V R M K G N T G E N L L I L L E S R L D N V V Y R M G F G  
XAC142 A R A L D S E Q K P G Q H G A A R G K L S D Y A T Q L R E K Q K V R I Y G L L E R Q F R N Y Y K K A S T K K G N T G E N L L Q L L E T R L D N V C Y R M G F A  
XCC137 A R A L D S E Q K P G Q H G A A R G K L S D Y A T Q L R E K Q K V R I Y G L L E R Q F R N Y Y K K A S T K K G N T G E N L L Q L L E T R L D N V C Y R M G F A  
XF2579 S R A L D S E Q R P G Q H G A V R S K L S D Y A S Q L R E K Q K V R I Y G V L E R Q F R N Y Y K N A S T K K G N T G E N L L Q L L E T R L D N V I Y R M G F A  
y3135 V R A I D T E Q P P G Q H G A R K P R L S D Y G V Q L R E K Q K V R R I Y G V L E R Q F R N Y Y K E A A R L K G N T G A N L L Q L L E G R L D N V V Y R M G F G  
YPO104 V R A I D T E Q P P G Q H G A R K P R L S D Y G V Q L R E K Q K V R R I Y G V L E R Q F R N Y Y K E A A R L K G N T G A N L L Q L L E G R L D N V V Y R M G F G  
Z0181 V R A I D T E Q A P G Q H G A R K P R L S D Y G V Q L R E K Q K V R R I Y G V L E R Q F R N Y Y K E A A R L K G N T G E N L L A L L E G R L D N V V Y R M G F G

b0170 A T R A E A R Q L V S H K A I M V N G R V V N I A S Y Q V S P N D V V S I R E K A K Q S R V K A A L E L A E Q E K P T W L E V D A G K M E G T F K R K P E R S  
Bbp214 S T R A E A R Q L V S H K S I L V N N C T V N I P S Y Q V S P G D V I S I H K N S K L Q S R I K A A L E L S E Q E T P I W I E V D F N K M Q G I Y K R V P E R S  
Bf131 S T R A E S R Q L V S H K S I I V N D C I V N I A S Y Q V V P N T V I Q V Y K K S H N Q S R I Y A A L E I A E Q E S V P W I E V D S A K L K G I F K R R P E R S  
bu232 C T R S E S R Q L I N H K S I M V N N K V V N I A S Y Q V S P N D Q I S I R N K S K N Q S R I K A A L E L V E Q E K P I W L E V N T K M E G I F K R F P E R S  
BUsG22 C T R S E S R Q L I S H K S I K V N N N I V N I A S Y Q I S P N D R I S V R D K S K N Q S R I K A A L E L T E Q E K L M W I E V N V T K M E G I F K R F P E R S  
HI0914 T T R A E A R Q L V S H K A I V V N G R V V N I P S F Q V S V N D V V A I R E K S K Q A R I K A S L E L A E Q E K P T W L E V D S A K M E G V F K R V P E R S  
PA3655 S T R S E S R Q L V S H K A I T V N G Q T V N I P S Y Q V K A G D V V A V R E K S K Q A R I K A S L E L A E Q E K P T W L E V D L D A G K M E G T F K R P E R S  
PM1985 A T R A E A R Q L V S H K A I V V N G R V V N I P S F Q V S V N D V V A V R E K S K Q A R I K A S L E L A E Q E K P T W L E V D A A K M E G V F K R V P E R S  
RSc140 S T R A E A R Q L V S H K A I L V N G Q A L N V P S A Q I K S G D V V A I R E K S K Q V R I A E S L S L A E Q G F P G W I A V D A K M E G T F K Q A P D R G  
STM021 A T R A E A R Q L V S H K A I M V N G R V V N I A S Y Q V S P N D V V S I R E K A K Q S R V K A A L E L A E Q E K P T W L E V D A G K M E G T Y K R K P E R S  
STY024 A T R A E A R Q L V S H K A I M V N G R V V N I A S Y Q V S P N D V V S I R E K A K Q S R V K A A L E L A E Q E K P T W L E V D A G K M E G T Y K R K P E R S  
vc2259 A T R A E A R Q L V S H K A I L V N G K V V N V P S F N V A N D V V A V R E K A K Q S R I K A A L E V A E Q E K P T W I E V D V N T M E G T F K R M P E R S  
wbr31 S T R L E S R Q L I S H K S I I I N K K V I N I P S Y Q I K P N D C I E V K E I A K K Q S R I K A A L E I S E Q E K S W I D V N T M E G T F K F F P D R S  
XAC142 V T R P A A R Q L V S H R G V L V N G K S V N L A S Y Q I K A G D A I T L S E K A Q K Q L R V Q E A L T V A E Q M T P S W V E V D S K K F S G V F K A V P D R A  
XCC137 V T R P A A R Q L V S H R G V L V N G K S V N L A S Y Q I K A G D A I T L S E K A Q K Q L R V Q E A L T V A E Q M T P S W V E V D S K K F S G V F K A V P D R A  
XF2579 V T R P A A R Q L V S H R R V L V N G K L V N L P S Y H V K P G D V V A L S Q R A Q K Y L C V Q E S L T I K D Q S A F S W V E V D S E K F S G V F K A F P D R A  
y3135 A T R A E S R Q L V S H K A I M V N G R V V N I A S Y Q V S P N D V V S I R E K A K Q S R V K A A L E L A E Q E K P T W L E V D A V K M E G V F K R I P E R T  
YPO104 A T R A E S R Q L V S H K A I M V N G R V V N I A S Y Q V S P N D V V S I R E K A K Q S R V K A A L E L A E Q E K P T W L E V D A V K M E G V F K R I P E R T  
Z0181 A T R A E A R Q L V S H K A I M V N G R V V N I A S Y Q V S P N D V V S I R E K A K Q S R V K A A L E L A E Q E K P T W L E V D A G K M E G T F K R K P E R S

b0170 D L S D I N E H L I V E L Y S G E L Q E K L I A V N R V S K T V K G G R I F S F T A L T V V G D G N G R V G F G Y G K A R E V P A A I Q K A M E K A R R N M I N  
Bbp214 D L S E I N E Y L I I E L Y S G D L K E K L I S V N R V S K T V K G G R I F S F A L T V V G D G K G V G F G Y G K A R E V P A A I Q K A M E K A R R N M I Q  
Bf131 E L S N I N E H L I V E L Y S H E L Q E K L I T V N R V S K T V K G G R V F S F A A L T V V G N V N G R V G F G Y G K A R E V P A A I Q K A M E K A R R N M I D

bu232 D L S E I N E Y L I V E L Y S N D L Q E K L I T V N R V S K T V K G G R I F S F T A L T V V G N G D G K V G F G Y G K A R E V P A A I Q K A M E Q A R R N M I T  
BUsG22 D L S E I N E H L I V E L Y S S E L Q E K L I T V N R V S K T V K G G R I F S F T A L T V V G N G E G R V G F G Y G K A R E V P A A I Q K A M E K A R R N M V T  
HI0914 D L S D I N E H L I V E L Y S G E L Q E K L I A V N R V S K T V K G G R I F S F T A L T V V G D G N G R V G F G Y G K A R E V P A A I Q K A M E K A R R N M I N  
PA3655 D L S D I N E H L I V E L Y S E G Y I E K L V Q V N R V A K T V K G G R I F A F T A L T V V G D G K G R V G F G R G K A R E V P A A I Q K A M E A A R R N M I Q  
PM1985 D L S D I N E H L I V E L Y S G E L Q E K L I A V N R V S K T V K G G R I M S F T A L T V V G D G N G R V G F G Y G K A R E V P A A I Q K A M E K A R R N M I N  
RSc140 D I A D I N E S L I V E L Y S D G L R E K M I A V N R V S K T V K G G R I L G F A A L T V V G D G D G R I G M G K G A K E V P A V A Q K A M D E A R R K M V K  
STM021 D L S D I N E H L I V E L Y S G E L Q E K L I A V N R V S K T V K G G R I F S F T A L T V V G D G N G R V G F G Y G K A R E V P A A I Q K A M E K A R R N M I N  
STY024 D L S D I N E H L I V E L Y S G E L Q E K L I A V N R V S K T V K G G R I F S F T A L T V V G D G N G R V G F G Y G K A R E V P A A I Q K A M E K A R R N M I N  
vc2259 D L S D I N E Q L I V E L Y S N D L Q E K L I A V N R V S K T V K G G R I M S F T A L T V V G D G N G R V G F G Y G K A R E V P A A I Q K A M E K A R R N M V T  
wbr31 D L S E I N E H L I I E L Y S N E L Q E K L I S V N R V S K T V K G G R I F S F T A L T V V G D C Q K I G F G Y G K S E V P A A I Q K A M D K A R R N M I I  
XAC142 D L P D I N E A L I V E L Y S D G M I E K L V A V N R V S K T V K G G R Q F T F T A L T V V G D G L G K V G F G Y G K A R E V P A A I Q K S M E Q A R K N L A T  
XCC137 D L P D I N E A L I V E L Y S D G M I E K L V A V N R V S K T V K G G R Q F T F T A L T V V G D G L G K V G F G Y G K A R E V P A A I Q K S M E Q A R K N L A T  
XF2579 D L P D I N E A L I V E L Y S D G M I E K L V A V N R V S K T V K G G R Q F T F T A L T I V G N E G S V G F G Y G K A R E V P A A I Q K S M E Y A R K T M A N  
y3135 D L S D I N E H L I V E L Y S G E L Q E K L I A V N R V S K T V K G G R I F S F T A L T V V G D G N G R V G F G Y G K A R E V P A A I Q K A M E K A R R A M I N

YPO104 DLSDINEHLIVELYSGELQEKLI AVNRVSKTVKGGRI FSFTALT VVGDGNGRVGFGY GKAREVPAI QKAMEKARRAMIN  
Z0181 DLSDINEHLIVELYSGELQEKLI AVNRVSKTVKGGRI FSFTALT VVGDGNGRVGFGY GKAREVPAI QKAMEKARRNMIN

b0170 VALNNGTLQHPVKGVHTGSRVFMQPA SEGTGI IAGGAMRAVLEVAGVHNV LAKAYGSTNP INVVRATIDGLENMNSPEMV  
Bbp214 VPLNNGTLQYSVTGSGYIFMFKPASNGTGI IAGGAMRSVLEVAGVHNV LAKTYGSTNP INVVRATMLVLESMKSPEMI  
Bf131 IPLPGRTLQHSIIGIYTGARIYMKPASEGTGI IAGGAMRAILEVVG IHNVLAKAYGSTNP INVVRATVNALKNMKSPEMV  
bu232 IPLVNTLQHSLSKGSHTGSNIFMFKPASDGTGI IAGGAMRAVLEVAGIHNVLAKTYGSTNP INVVRATMNGLVNMKSPEMI  
BUsG22 IPLVNTLQHSLSKGSHTGSNIFMFKPASDGTGI IAGGAMRAVLEVAGIHNVLAKTYGSTNP INVVRATMNGLVNMKSPEMI  
HI0914 VALNEGT LQHPVKGVHTGSRVFMQPA SEGTGI IAGGAMRAVLEVAGVRNVLSKAYGSTNP INVVRATIDALANMKSPEMV  
PA3655 VDLNNGTLQYPTKSAHGASKVVMQPA SEGTGI IAGGAMRAVLEVAGVQNV LAKCYGSTNP INVVRATYATFKGLKNMQAPEAV  
PM1985 VALNEGT LQHP IKG AHTGSRVFMQPA SEGTGI IAGGAMRAVLEVAGVRNVLSKAYGSTNP INVVRATIDALANMKSPEMV  
RSc140 VPLKNGTLQHEVIGKHGA AKVLMAPAKEGTGVI IAGGMPRAIFEVMGVTNI VTKSHGSTNP YNMVRATLDGLRKMSTPAEI  
STM021 VALNNGTLQHPVKGVHTGSRVFMQPA SEGTGI IAGGAMRAVLEVAGVHNV LAKAYGSTNP INVVRATIDGLENMNSPEMV  
STY024 VALNNGTLQHPVKGVHTGSRVFMQPA SEGTGI IAGGAMRAVLEVAGVHNV LAKAYGSTNP INVVRATIDGLENMNSPEMV  
vc2259 IALNEGT LHHPPVKGRHSGSKVVMQPA AEGTGI IAGGAMRAVLEVAGVHNV LSKAYGSTNP INVVRATIDALVDVKSPEMV  
wbr31 IPIVCKTLQHEINGYHTGSRVFMQPA SEGTGI IAGGAMRAVLEVAGVHNV LAKVYGSTNP INVVRATVNALKMKRFPMI  
XAC142 VALNNGTLQHPVKGVHTGSRVFMQPA SEGTGI IAGGAMRAVLEVAGVHNV LAKAYGSTNP INVVRATIDGLENMNSPEMV  
XCC137 VDLNNGTLQHPVKGVHTGSRVFMQPA SEGTGI IAGGAMRAVLEVAGVHNV LAKAYGSTNP INVVRATIDGLENMNSPEMV  
XF2579 VDLNNGTLQHPVKGVHTGSRVFMQPA SEGTGI IAGGAMRAVLEVAGVHNV LAKAYGSTNP INVVRATIDGLENMNSPEMV  
y3135 VALNNGTLQHPVKGVHTGSRVFMQPA SEGTGI IAGGAMRAVLEVAGVHNV LAKAYGSTNP INVVRATIDGLENMNSPEMV  
YPO104 VALNNGTLQHPVKGVHTGSRVFMQPA SEGTGI IAGGAMRAVLEVAGVHNV LAKAYGSTNP INVVRATIDGLENMNSPEMV  
Z0181 VALNNGTLQHPVKGVHTGSRVFMQPA SEGTGI IAGGAMRAVLEVAGVHNV LAKAYGSTNP INVVRATIDGLENMNSPEMV

b0170 AAKRGKSV EEMRHYE IVFMVHPDQSE QVPGMIERYTAAITGAEGK IHRLEDWGRRLAYP INKLKHAHYVLMNVEAPQE  
Bbp214 ALKRNLKVEIVRHYE IILLIHPDCSEKLP IMIEKFKKLVITYGKGR IHRLEDWGRRLAYP INKLKHAHYVLMNIEVPSN  
Bf131 AEKRGKSL EYIMRYE IVLIIHPDSDNQIDNLNYYSEII INSTGKIHRLENWGRRLAYP INKLKHAHYVLMNIEVPSN  
bu232 AAKRNKRIKDIMRHYE IIFM VHPDQSDKIPLLIEKYKKI IINDNNGI IHRLEDWGRRLAYP INKLKHAHYVLMNIEVPSN  
BUsG22 AAKRNKLI EDIMRHYE IIFM IHPDYSEKVSVI IEKYKKI IHHNSGI IHRLEDWGRRLAYP INKLKHAHYVLMNIEVPSN  
HI0914 AAKRGKSV EEMRHYE IVFMVHPDQSE QVPGMIERYTGSVKEAGGQVHRLEDWGRRLAYP INKLKHAHYVLMNVEAPQE  
PA3655 AAKRGKSV EEMRHYE IVFLVHPDQSE QVGMVER YTKAIEEDGGK IHRLEDWGRRLAYP INNVHKAHYVLMNVECSAK  
PM1985 AAKRGKTV DEIMRHYE IVFMVHPDQSE QVPGMIERYTGSVKEAGGQVHRLEDWGRRLAYP INKLKHAHYVLMNVEAPQE  
RSc140 AAKRGKSV EEMRHYE IVFIVHPDQSE QVPGMIERYTGSVKEAGGQVHRLEDWGRRLAYP INKLKHAHYVLMNVEAPQE  
STM021 AAKRGKSV EEMRHYE IVFMVHPDQSE QVPGMIERYTAAITGAEGK IHRLEDWGRRLAYP INKLKHAHYVLMNVEAPQE  
STY024 AAKRGKSV EEMRHYE IVFMVHPDQSE QVPGMIERYTAAITGAEGK IHRLEDWGRRLAYP INKLKHAHYVLMNVEAPQE  
vc2259 AAKRGLTVEA IMRHYE IVFMVHPDQSE QVPGMIERYTGSVKEAGGQVHRLEDWGRRLAYP INKLKHAHYVLMNVEADQA  
wbr31 AEKRGKSIDDIMRHYE IVLMIHTDQSDQISNI IEHYTKMIKINKGSIHRLEDWGRRLAYP IKKLNKAHYVLMNIEVPSN  
XAC142 AAKRGKVEELSRHYEVVFLVHPDQSE QVPGMIERYTGSVKEAGGQVHRLEDWGRRLAYP IQNLVKAHYVLLNIEVDQA  
XCC137 AAKRGKVEELSRHYEVVFLVHPDQSE QVPGMIERYTGSVKEAGGQVHRLEDWGRRLAYP IQNLVKAHYVLLNIEVDQA  
XF2579 ALKRGKNVGRFGGRHYE IVLLVHPDQSE QVQAMLER YKALIEGHGKIHRLEDWGRRLAYP IQKLVKAHYVLMNIEVEQS  
y3135 AAKRGKSV EEMRHYE IVFMVHPDQSE QVPGMIERYTAAITGAAGT IHRLEDWGRRLAYP INKLKHAHYVLLNVEAPQE  
YPO104 AAKRGKSV EEMRHYE IVFMVHPDQSE QVPGMIERYTAAITGAAGT IHRLEDWGRRLAYP INKLKHAHYVLLNVEAPQE  
Z0181 AAKRGKSV EEMRHYE IVFMVHPDQSE QVPGMIERYTAAITGAAGT IHRLEDWGRRLAYP INKLKHAHYVLLNVEAPQE

b0170 VIDELETTFRFNDAVIRSMVVRTKHAVTEASP MVKAKDMPRRRVI GQRKILPDPKFGSELLAKFVNI LMVDGKKSTAESI  
Bbp214 CIQDLSNTFRYDDLIRNI IMHVKKS VTEI SPMLKSKEMPRRRRIGHRKILSDPKFSSEMVAKLINI IMVDGKKSIAEEI  
Bf131 ILDI LDNDFR FNEI IRLYLIMRTKNI IIVDPSAMVKKKDMSPRRRIVTKRVILADPRFKSDLLSKFINILMFDGKKSVAESI  
bu232 ITITLLETDFR FNII LRNMIMS SVKKAIVELSP ILKLDMPRRRVI IGT RKILPDPKFGSELLAKFINILMFDGKKSIAEVI  
BUsG22 TISLLETDFR FNNAVIRNII ISVKKAINESP VIKL KEMPRRRVI ISTRKILPDPKFGSELLAKFINILMVDGKKSIAEVI  
HI0914 VIDELETTFRFNDAVIRSLV IHTKHAVTEASP MVKAKEMPRRRRVEARKILPDPKFGSELLAKFINIMVDGKKSVAESI  
PA3655 ALAELEDFR FNDAVIRNLV MRDEAVTEQSEMLKAEEMPRRRRVA AKRELVADPKYGSQILAKFNMHAYVLMNVEADQA  
PM1985 VIDELETTFRFNDAVIRNVI IRTKHAVTEASP MVKAKDMPRRRVI EPRKILPDPKFGSELLAKFINILMVDGKKSIAEVI  
RSc140 TLAELHAFKFNDAVIRHLIVQT KKAETAPSPMMKEVQMPRRRVEPKREILPDPKFGNVEVAKFMNVLMDGKKSVAERI  
STM021 VIDELETTFRFNDAVIRSMVVRTKHAVTEASP MVKAKDMPRRRVI GQRKILPDPKFGSELLAKFVNI LMVDGKKSTAESI  
STY024 VIDELETTFRFNDAVIRSMVVRTKHAVTEASP MVKAKDMPRRRVI GQRKILPDPKFGSELLAKFVNI LMVDGKKSTAESI  
vc2259 VVDELETTFRFNDAVIRNMI MRTKAAIT EPI SMLKAREMPRRRVI GQRKILPDPKFGSELLAKFVNI LMVDGKKSTAESI  
wbr31 VLNLI IQDNLNFI IIRNMI MRVKNAINESP MKKTKEMPRRRRVA AKRELVADPKYGSQILAKFNMHAYVLMNIEVPSN  
XAC142 VLSELVESFRFNDAVIRHLVVKRDGADTEQSLIMKSKDMSRKGSTPQRTVLPDPKHGSETIARFINMVMQSGKKSVAEVI  
XCC137 VLSELVESFRFNDAVIRHLVVKRDGADTEQSLIMKSKDMSRKGSTPQRTVLPDPKHGSETIARFINMVMQSGKKSVAEVI  
XF2579 VLNELVDLFRFNDAVIRHLA IKRSGPDTEQSFIMKSKDMSRKGSTPQRNVLPDPKYGSETIARFINMVMQSGKKSVAEVI

y3135 AIDELETTFRFNDAVIRSMVVRTKHAVTEASP MVKAKDMPRRRVI GQRKILPDPKFGSELLAKFVNI LMVDGKKSTAESI  
YPO104 AIDELETTFRFNDAVIRSMVVRTKHAVTEASP MVKAKDMPRRRVI GQRKILPDPKFGSELLAKFVNI LMVDGKKSTAESI  
Z0181 AIDELETTFRFNDAVIRSMVVRTKHAVTEASP MVKAKDMPRRRVI GQRKILPDPKFGSELLAKFVNI LMVDGKKSTAESI

b0170 VYSALETLAQEAF EFALEENVRPTVEVKSRRVGGSTYQVPVEVRPVR RNALAMRWI VEAAKRKGDKSMALRLANELSDAAE  
Bbp214 VYQALTM LAKEVLELAL ENVRPTVEVKSRRVGGSTYQVPVEVRPVR RNALAMRWI VHSARKRIDKSMI IRLSNELSDAIE  
Bf131 IYSALDMVLDELFEALDNVRPVVEVKSRRVGGSTYQVPVEVRPVR RNALAMRWI IESARKRNDKSMEMRLANELSDASE  
bu232 VYTALKNLSKEAFE IALENVRPTVEVKSRRVGGSTYQVPVEVRPVR RNALAMRWI VESARKRVDKSM SMLRLANELYDALE  
BUsG22 VYTALKNLSKEAFE IALENVRPTVEVKSRRVGGSTYQVPVEVRPVR RNALAMRWI VDSARKRVDKSM SMLRLANELYDAVE  
HI0914 VYGALETLAQEAF EFALEENVRPTVEVKSRRVGGSTYQVPVEVRPVR RNALAMRWI VEAAKRKGDKSMALRLANELSDASD  
PA3655 VYGALDKVKEETFEKALDAIAPLVEVKSRRVGGSTYQVPVEVRPVR RNALAMRWI VDFARKRGEKSMALRLAGELLDAAE  
PM1985 VYSALDTLAQEAF EFAALDNVRPTVEVKSRRVGGSTYQVPVEVRPVR RNALAMRWI VDAARKRGDKSMALRLANELSDASE  
RSc140 VYGAFDQIEKEVFTLAIIGNIKPVVEVKSRRVGGANYQVPVEVRPVR RNALAMRWI REAAKRKSEKSMALRLAGELLEASE  
STM021 VYSALETLAQEAF EFALEENVRPTVEVKSRRVGGSTYQVPVEVRPVR RNALAMRWI VEAAKRKGDKSMALRLANELSDAAD  
STY024 VYSALETLAQEAF EFALEENVRPTVEVKSRRVGGSTYQVPVEVRPVR RNALAMRWI VEAAKRKGDKSMALRLANELSDAAD  
vc2259 VYTALDTMAEAVFEAL ENVRPAVEVKSRRVGGSTYQVPVEVRPVR RNALAMRWI VEAAKRKGEKSMARLAEMLDAAE  
wbr31 IYTALNNLKTIFDLALEKVRPIVEVKSRRVGGSTYQVPVEVRPVR RNALAMRWI IESARKRVDKSM SMLRLANELYDALE  
XAC142 VYGAMDVIGEELVQKALDNVAPAVEVKSRRVGGATYQVPVEVRSSRRMALAMRWI IDSARKRGENTMPRKLAAELLDASE  
XCC137 VYGAMDVIGEELVQKALDNVAPAVEVKSRRVGGATYQVPVEVRSSRRMALAMRWI IDSARKRGENTMPRKLAAELLDASE  
XF2579 VYGAMDVIGEELVQKALDNVSPAVEVKSRRVGGATYQVPVEVRASRRMALAMRWI IDSARKRGENTMPRKLAAELLDASE  
y3135 VYTALETLAQEAF EFALEENVRPTVEVKSRRVGGSTYQVPVEVRPVR RNALAMRWI VDAARKRGDKSMALRLANELSDAAE  
YPO104 VYTALETLAQEAF EFALEENVRPTVEVKSRRVGGSTYQVPVEVRPVR RNALAMRWI VDAARKRGDKSMALRLANELSDAAE  
Z0181 VYSALETLAQEAF EFALEENVRPTVEVKSRRVGGSTYQVPVEVRPVR RNALAMRWI VEAAKRKGDKSMALRLANELSDAAE

b0170 NKGTA VVKREDVHRMAEANKAF AHYRWMSMQDP IADMLTRIRNGQAAANKAAVTMPSSKLVKVAIANVLKEEGFI EDKFTKP  
Bbp214 NKGSAVKKREDVHRMAEANKAF AHYRWMSMQDP IADMLTRIRNGQFASKISVIMPSKLVKVISILLKEEGYIKDFS NKP  
Bf131 GKGNAVKKREEVHRLAESNKAF AHYRWMSMQDP IADMLTVIRNGQVAKKDKVYVPSSTIKIAITKVLVEEGFLKDYSIKFI

bu232 NKGTAVKKREEDVHRMAEANKAFAHYRWMSMQDPVADMLTRIRNGQLANKYSVKMPPSSKLLKYSIIQLLKEEGYIKDYNTKL  
BUsg22 NKGTAVKKREEDVHRMAEANKAFAHYRWMSMQDPVADMLTRIRNGQSAANKYSVKMPCSKLLKYSIELELKEEGYIKNFNNKL  
HI0914 NKGAAVKKREEDVHRMAEANKAFAHYRWMSMQDPVADMLTRIRNGQAANKVA INMPPSSKLLKVA IANVLAEEGYIESVKAKP  
PA3655 KGGAAVKKREEDVHRMAEANKAFSHYRFMSMQDPLADMLTRIRNAQMAEKTIVVSMPPSSKLLKAAVAVKLDDEGYIADFFQVQP  
PM1985 NKGAAVKKREEDVHRMAEANKAFAHYRWMSMQDPVADMLTRIRNGQAANKVA ISMPPSSKLLKVA IANVLAEEGYIESVKAKP  
RSc140 GRGGAMKKREEDVHRMAEANKAFSHFRFMSMQDPIADMLTRIRNAQAVEKASVVMPPSSKLLKVA IAKVLKDEGYIDDFAGKA  
STM021 NKGTAVKKREEDVHRMAEANKAFAHYRWMSMQDPIADMLTRIRNGQAANKAAVTMPSSKLLKVA IANVLKEEGFIEDFKTKP  
HY024 NKGTAVKKREEDVHRMAEANKAFAHYRWMSMQDPIADMLTRIRNGQAANKAAVTMPSSKLLKVA IANVLKEEGFIEDFKTKP  
vc2259 NKGSVKKREEDVHRMAEANKAFAHYRWMSMQDPIADMLTRIRNGQAANKVA AVKMPSSKLLKVA IAALLKAEGYIADFAVKA  
wbr31 NKGTAVKKREEDVHRMAEANKAFAHYRWMSMQDPIADMLTRIRNGQSAKKELSMPPSNLKKSIANLLKEEGFILDYKPKP  
XAC142 SRGGAIAKKREETHRMAEANKAFAHYRWMSMQDPIADMLTRIRNGQSAKKELSMPPSNLKKSIANLLKEEGFILDYKPKP  
XCC137 SRGGAIAKKREETHRMAEANKAFAHYRWMSMQDPIADMLTRIRNGQSAKKELSMPPSNLKKSIANLLKEEGFILDYKPKP  
XF2579 SRGGAIAKKREETHRMAEANKAFAHYRWMSMQDPIADMLTRIRNGQSAKKELSMPPSNLKKSIANLLKEEGFILDYKPKP  
y3135 NKGSVKKREEDVHRMAEANKAFAHYRWMSMQDPIADMLTRIRNGQAANKAAVTMPSSKLLKVA IANVLKEEGFIEDFKTKP  
YPO104 NKGSVKKREEDVHRMAEANKAFAHYRWMSMQDPIADMLTRIRNGQAANKAAVTMPSSKLLKVA IANVLKEEGFIEDFKTKP  
Z0181 NKGTAVKKREEDVHRMAEANKAFAHYRWMSMQDPIADMLTRIRNGQAANKAAVTMPSSKLLKVA IANVLKEEGFIEDFKTKP

b0170 ELELTLKYFQKAVVESIQRVSRPGLRIYKRKDELPKVMAGLGIAVSTSGVMTDRAARQAGLGGEEICVYMAENQYYG  
Bbp214 ILEIFLKYFRSKPVIENITRVSSPRLRIYARNKLLPQVMSGLGIVISTSQVLTQVARKKGLGGEEICNVMENMYQYG  
Bf131 ILEISLKYQNKPVLDHIQRI SRPSLRIVYKNNKMLPKVLSGMGVAVVSTSGVMTDRKARLNQVGEICVYMIQNYYG  
bu232 ELEVFLKYFQKGSVVDIMQRI SRPSLRIVYKNNKMLPKVMSGLGIAVISTSGVMTDRMARQEGGLGGEVICVYMIQTQNYG  
BUsg22 KIEVILKYFQKGSVIEIETIQRVSRPGLRIYKRKDELPKVMAGLGIAVISTSQGIMTDRKARRLGLGGEVICVYVMVKIQNYG  
HI0914 ELELTLKYFQKPVVESIQRVSRPGLRIYKRKDELPKVMAGLGIAVISTSGVMTDRAARQAGLGGEEICVYMAENQYYG  
PA3655 QLSIELKYFEGKPVIEEVKRI SRPGLRQYKVEQLPKVRRGLGVSIVSTNKGVMTDRAARAAGVGGVEVLCVMSATQNYG  
PM1985 ELELTLKYFQKPVVESIQRVSRPGLRIYKRKDELPKVMAGLGIAVISTSGVMTDRAARQAGLGGEEICVYMAENQYYG  
RSc140 SLTIGLKYIYAGRPVIERLERVSKPGLRQYKGRNEIPQVMGLGVAIISTPQGLMTDRRARATGVLGGEVICVYMIQNYG  
STM021 ELELTLKYFQKAVVESIQRVSRPGLRIYKRKDELPKVMAGLGIAVSTSGVMTDRAARQAGLGGEEICVYMAENQYYG  
STY024 ELELTLKYFQKAVVESIQRVSRPGLRIYKRKDELPKVMAGLGIAVSTSGVMTDRAARQAGLGGEEICVYMAENQYYG  
vc2259 ELELTLKYFQKAVVESIQRVSRPGLRIYKRKDELPKVMAGLGIAVSTSGVMTDRAARQAGLGGEEICVYMAENQYYG  
wbr31 TLKLNLYKFKNNPVIEKIKRI SRPGLRIYKRKHLPNVMSGMGIAVISTSRGIMTDKLARTYNLGGEEICVYVMNEQYYG  
XAC142 ELEIVLKYFEGRPVIEITLKRFRSGLRQYKTELPKVGLGGLGIAIISTSGVMTDAQAREAGVGGVEVLCVMAITQNYG  
XCC137 ELEIVLKYFEGRPVIEITLKRFRSGLRQYKTELPKVGLGGLGIAIISTSGVMTDAQAREAGVGGVEVLCVMAITQNYG  
XF2579 DIEIVLKYFEGRPVIRILKRVSRGLRKYCGKAEELPKVGLGGLGISIISTSGVMTDAQAREAGVGGVEVLCVMAITQNYG  
y3135 VLELALKYFQKAVVESIQRI SRPGLRIYKRKDELPKVMAGLGIAVISTSGVMTDRAARQAGLGGEEICVYMAENQYYG  
YPO104 VLELALKYFQKAVVESIQRI SRPGLRIYKRKDELPKVMAGLGIAVISTSGVMTDRAARQAGLGGEEICVYMAENQYYG  
Z0181 ELELTLKYFQKAVVESIQRVSRPGLRIYKRKDELPKVMAGLGIAVSTSGVMTDRAARQAGLGGEEICVYMAENQYYG

b0170 TGRKSSAARVFIKPGNGKIVINQRSLQYFGRETARMVVRQPLELVDMEKLDLYITVKGGSISGQAGAIRHGITRALM  
Bbp214 TGRKSSAARVFLKTGTGNITINNRLNNYFSRRTARLIILOPIEFVNMSSKCDLYITVKGGSISGQAGAIRHGISRALI  
Bf131 TGRKSSAARVFLRFGNGDIVINNLSDKYPFKDNFQI I IKKPLEVTNVLNILDAYITVIGGGVSGQAGAIRHGITRALL  
bu232 TGRKSSAARVFLRSGNGEIVVNRKSLDQYFGRETSKCMIVRQPLELVDMMVDFKFNIIYITVKGGSISGQAGAIRHGITRALI  
BUsg22 TGRKSSAARVFLRSGDGEITVNRKSLKDYFGRETSKCMVVRQPLELVDMMNFNIIYITVKGGSISGQAGAIRHGITRALI  
HI0914 TGRKSSAARVFIKPGSGKITINQRSLDQYFGRETARMVVRQPLELVELTDKLDLYITVKGGSISGQAGAIRHGITRALM  
PA3655 TGRKKTATARVFLRPGTGKISINNRGLDQYFGRETARMVVRQPLELVELTETVEKFDIFVTVGGVSGQAGAIRHGITRALI  
PM1985 TGRKSSAARVFIKPGSGKITINQRDLVDYFGRETARMIVRQPLELVEVTEKLDLYITVKGGSISGQAGAIRHGITRALI  
RSc140 TGRKSSAARVFIKPGSGKITIVNGKPLVADYFARETSLMMVVRQPLELTHGATFDIKVNVVGGGETGQAGAVRHGITRALI  
STM021 TGRKSSAARVFIKPGNGKIVINQRSLQYFGRETARMVVRQPLELVDMEKLDLYITVKGGSISGQAGAIRHGITRALM  
STY024 TGRKSSAARVFIKPGNGKIVINQRSLQYFGRETARMVVRQPLELVDMEKLDLYITVKGGSISGQAGAIRHGITRALM  
vc2259 TGRKSSAARVFIKPGSGNIVINRSLQYFGRETSKCMVVRQPLELVDMEKLDLYITVKGGSISGQAGAIRHGITRALM  
wbr31 TGRKKTATARVFIKPGNGKIVINQRSLQYFGRETARMVVRQPLELVELTETVEKFDIFVTVGGVSGQAGAIRHGITRALI  
XAC142 TGRKSSSTARVFLRKGSGNITVNNRPLDEFFGRETARMIVRQPLELTKNTESEFDIMVTASGGGTTGQAGAIRLGIARALV  
XCC137 TGRKSSSTARVFLRKGSGNITVNNRPLDEFFGRETARMIVRQPLELTKNTESEFDILVVTASGGGTTGQAGAIRLGIARALV  
XF2579 TGRKSSKARIFLKRKSGNITVNGRPLDQYFGRETARMIVRQPLELTKNANFDFILITATGGGTTGQAGAIRLGIARALV  
y3135 TGRKSSAARVFLKPGSGKIVINQRSLQYFGRETARMVVRQPLELVDMEKLDLYITVKGGSISGQAGAIRHGITRALM  
YPO104 TGRKSSAARVFLKPGSGKIVINQRSLQYFGRETARMVVRQPLELVDMEKLDLYITVKGGSISGQAGAIRHGITRALM  
Z0181 TGRKSSAARVFIKPGNGKIVINQRSLQYFGRETARMVVRQPLELVDMEKLDLYITVKGGSISGQAGAIRHGITRALM

b0170 EYDESLRSELRKAGFVTRDARQVERKKVGLRKARRRPQFSKRQRIIRLKAQFDHRLIDQATAEIVETAKRTGAQVRGPIP  
Bbp214 KYDSSFRNELRKLGFITRDSRQVERKKVGFKARRRPQFSKRQRIIRLKAQFDHRLIDQSTAEIVETAKRTGAQVRGPIP  
Bf131 QYNAEFKSVLRATGLMTRDSRMVERKKVGLRKARRSPQFSKRQRIIRLKAQFDHRLIDRSTLDIVETAKRTGAQVHGPIP  
bu232 KYNQTLRFELRKAGFVTRDARQVERKKVGFKARRRPQFSKRQRIIRLKAQFDHRLIDQSTAEIVETAKRTGAQVRGPIP  
BUsg22 KYNHLLRSELRKAGFVTRDARQVERKKVGLRKARRRPQFSKRQRIIRLKAQFDHRLIDQSTAEIVETAKRTGAQVRGPIP  
HI0914 EYDETLRPAALRAAGFVTRDARRVERKKVGLHKARRRPQFSKRQRIIRLKAQFDHRLIDQSTAEIVETAKRTGAQVRGPIP  
PA3655 EYDETLRSSLRKAGFVTRDAREVERKKVGLRKARRRPQFSKRQRIIRLKAQFDHRLIDQSTAEIVETAKRTGAQVRGPIP  
PM1985 EYDESLRSLRAAGFVTRDARQVERKKVGLRKARRRPQFSKRQRIIRLKAQFDHRLIDQSTAEIVETAKRTGAQVRGPIP  
RSc140 DYDATLKPTLKAGLVTDRDAREVERKKVGLHKARRRPQFSKRQRIIRLKAQFDHRLIDQSAEIVETAKRTGAIVKGPV  
STM021 EYDESLRSELRKAGFVTRDARQVERKKVGLRKARRRPQFSKRQRIIRLKAQFDHRLIDQSTAEIVETAKRTGAQVRGPIP  
STY024 EYDETLRSELRKAGFVTRDARQVERKKVGLRKARRRPQFSKRQRIIRLKAQFDHRLIDQSTAEIVETAKRTGAQVRGPIP  
vc2259 EYDESLRPLRAAGFVTRDARRVERKKVGLRKARRRPQFSKRQRIIRLKAQFDHRLIDQSAEIVETAKRTGAQVRGPIP  
wbr31 KYDSSLKTTLRDSGFI TRDSRQVERKKVGFKARRRPQFSKRQRIIRLKAQFDHRLIDQSTAEIVETAKRTGAQVRGPIP  
XAC142 EYDETLRSELRKAGFVTRDAREVERKKVGLHKARRATQFSKRQRIIRLKAQFDHRLIDRSASEIVETAKRTGAQVRGPIP  
XCC137 EYDETLKSELRKAGFVTRDAREVERKKVGLHKARRATQFSKRQRIIRLKAQFDHRLIDRSASEIVETAKRTGAQVRGPIP  
XF2579 EYDASLKPSELRKAGFVTRDAREVERKKVGLHKARRATQFSKRQRIIRLKAQFDHRLIDRSASEIVETAKRTGAHVRGPIP  
y3135 EYDESLRSELRKAGFVTRDAREVERKKVGLRKARRRPQFSKRQRIIRLKAQFDHRLIDQSTAEIVETAKRTGAQVRGPIP  
YPO104 EYDESLRSELRKAGFVTRDAREVERKKVGLRKARRRPQFSKRQRIIRLKAQFDHRLIDQSTAEIVETAKRTGAQVRGPIP  
Z0181 EYDESLRSELRKAGFVTRDARQVERKKVGLRKARRRPQFSKRQRIIRLKAQFDHRLIDQATAEIVETAKRTGAQVRGPIP

b0170 LPTRKERFTVILSPHVNKDARDQYERITHRLVDI VEPTKTVDALMRLDLAAGVDVQISLIRARRRKQVSDGVAHIHA  
Bbp214 LPTRKERFTVILSPHVNKDARDQYERITHRLVDI VEPTKTVDALMRLDLAAGVDVQISLIRVKKRKKQILDGIAHIHA  
Bf131 LPTRKERFTVILSPHVNKDARDQYERITHRLVDI VDPKTDKTVDALMRLDLAAGVDVQISLIRLRKRKKQVVDGIAHIHA  
bu232 LPTRKERFTVILSPHVNKDARDQYERITHRLVDI VEPTKTVDALMRLDLAAGVDVQISLIRTRKRKKQILDGIAHIHA  
BUsg22 LPTRKERFTVILSPHVNKDARDQYERITHRLVDI VEPTKTVDALMRLDLAAGVDVQISLIRTRKRKKQVVDGIAHIHA  
HI0914 LPTRKERFTVILSPHVNKDARDQYERITHRLVDI VEPTKTVDALMRLDLAAGVDVQISLIRVRRKRKKQVVDGIAHIHA  
PA3655 LPTRKERFTVILSPHVNKDARDQYERITHRLVDI VQPTDKTVDALMRLDLAAGVDVQISLARPRKKKQVVDGIAHIHA  
PM1985 LPTRKERFTVILSPHVNKDARDQYERITHRLVDI VEPTKTVDALMRLDLAAGVDVQISLIRVRRKRKKQVVDGIAHIHA  
RSc140 LPTRIQRFVILRSPHVNKTSRDQYERITHRLVDI VDPKTDKTVDALMRLDLAAGVDVQISLIRARRRKQVVDGIAHIHA  
STM021 LPTRKERFTVILSPHVNKDARDQYERITHRLVDI VEPTKTVDALMRLDLAAGVDVQISLIRVRRKRKKQVSDGVAHIHA

STY024 LPTRKERFTVLISPHVNDKARDQYEIRTHKRLVDIPEPTEKTVDALMRLDLAAGVDVQISLVCARKRRKQVSDGVAHIHA  
vc2259 LPTRKERFTVLISPHVNDKARDQYEIRTHKRLVDIPEPTEKTVDALMRLDLAAGVDVQISLFRARRRKQVADGVAHIHA  
wbr31 LPTRKERFTVLISPHVNDKARDQYEIRTHKRLVDIPEPTEKTVDALMRLDLAAGVDVQISLFRARRRKQVADGVAHIHA  
XAC142 LPTKIERYTTILVSPHADKARDQYETRTHKRLVDIPEPTEKTVDALMRLDLAAGVDVQIKLKKTKKKRVTIDGVAHVHA  
XCC137 LPTKIERYTTILVSPHADKARDQYETRTHKRLVDIPEPTEKTVDALMRLDLAAGVDVQIKLKKTKKKRVTIDGVAHVHA  
XF2579 LPTKIERCTILVSPHADKARDQYETCTYKRVLYIPEPTEKTVDALMRLDLAAGVDVQIKLVKIKKKRVTIDGVAHISA  
y3135 LPTRKERFTVLISPHVNDKARDQYEIRTHKRLVDIPEPTEKTVDALMRLDLAAGVDVQISLFRARRRKQVSDGVAHIHA  
YPO104 LPTRKERFTVLISPHVNDKARDQYEIRTHKRLVDIPEPTEKTVDALMRLDLAAGVDVQISLFRARRRKQVSDGVAHIHA  
Z0181 LPTRKERFTVLISPHVNDKARDQYEIRTHKRLVDIPEPTEKTVDALMRLDLAAGVDVQISLFRARRRKQVSDGVAHIHA

b0170 SFNNTIVTITDRQGNALGWATAGGSGFRGSRKSTPFAAQVAERCAEIVKDYGIKNLEVMVKGPPGRESTIRALNAAGF  
BBp214 SFNNTIISISDKKGNLWGWATAGGSGFRGSRKSTPFAAQVAERCAEIVKDYGIKNLEVMVKGPPGRESTIRALNAAGF  
Bf131 SFNNTIVTITDRQGNALGWATAGGSGFRGSRKSTPFAAQVAERCAEIVKDYGIKNLEVMVKGPPGRESTIRALNAAGF  
bu232 SFNNTIVTITDRQGNALGWATAGGSGFRGSRKSTPFAAQVAERCAEIVKDYGIKNLEVMVKGPPGRESTIRALNAAGF  
BUsg22 SFNNTIVTITDRQGNALGWATAGGSGFRGSRKSTPFAAQVAERCAEIVKDYGIKNLEVMVKGPPGRESTIRALNAAGF  
HI0914 SFNNTIVTITDRQGNALAWATAGGSGFRGSRKSTPFAAQVAERCAEIVKDYGIKNLEVMVKGPPGRESTIRALNAAGF  
PA3655 SFNNTIVTITDRQGNALSWATAGGSGFRGSRKSTPFAAQVAERCAEIVKDYGIKNLEVMVKGPPGRESTIRALNAAGF  
PM1985 SFNNTIVTITDRQGNALAWATAGGSGFRGSRKSTPFAAQVAERCAEIVKDYGIKNLEVMVKGPPGRESTIRALNAAGF  
RSc140 SFNNTIITITDRQGNALSWATAGGSGFRGSRKSTPFAAQVAERCAEIVKDYGIKNLEVMVKGPPGRESTIRALNAAGF  
STM021 SFNNTIVTITDRQGNALGWATAGGSGFRGSRKSTPFAAQVAERCAEIVKDYGIKNLEVMVKGPPGRESTIRALNAAGF  
STY024 SFNNTIVTITDRQGNALGWATAGGSGFRGSRKSTPFAAQVAERCAEIVKDYGIKNLEVMVKGPPGRESTIRALNAAGF  
vc2259 SFNNTIVTITDRQGNALAWATAGGSGFRGSRKSTPFAAQVAERCAEIVKDYGIKNLEVMVKGPPGRESTIRALNAAGF  
wbr31 SFNNTIVTITDRQGNALGWATAGGSGFRGSRKSTPFAAQVAERCAEIVKDYGIKNLEVMVKGPPGRESTIRALNAAGF  
XAC142 SFNNTIVTITDRQGNALSWATAGGSGFRGSRKSTPFAAQVAERCAEIVKDYGIKNLEVMVKGPPGRESTIRALNAAGF  
XCC137 SFNNTIVTITDRQGNALSWATAGGSGFRGSRKSTPFAAQVAERCAEIVKDYGIKNLEVMVKGPPGRESTIRALNAAGF  
XF2579 SFNNTIVTITDRQGNALFWCTSGAGFRGSRKSTPFAAQVAERCAEIVKDYGIKNLEVMVKGPPGRESTIRALNAAGF  
y3135 SFNNTIVTITDRQGNALGWATAGGSGFRGSRKSTPFAAQVAERCAEIVKDYGIKNLEVMVKGPPGRESTIRALNAAGF  
YPO104 SFNNTIVTITDRQGNALGWATAGGSGFRGSRKSTPFAAQVAERCAEIVKDYGIKNLEVMVKGPPGRESTIRALNAAGF  
Z0181 SFNNTIVTITDRQGNALGWATAGGSGFRGSRKSTPFAAQVAERCAEIVKDYGIKNLEVMVKGPPGRESTIRALNAAGF

b0170 RITNITDVTPIPHNGCRPPKRRMATVNLVRKPRARKVAKSNVPALEACPQKRGVCTRVYTTTPPKPNSALRKVCRVRL  
BBp214 RIIINITDVTPIPHNGCRSPKRRMATVNLVRKSRSRKLIKNNVPALEACPQKRGVCTRVYTTTPPKPNSALRKVCRVRL  
Bf131 HIIISIDVTPIPHNGCRPAKRRMVTINQLVGNARSIRVVKSSVPALEACPQKRGVCTRVYTTTPPKPNSALRKVCRVRL  
bu232 RITNITDVTPIPHNGCRPPKRRMATVNLVRKPRVVKVKSNNVPALEACPQKRGVCTRVYTTTPPKPNSALRKVCRVRL  
BUsg22 RITNITDVTPIPHNGCRPPKRRMATVNLVRKPRLRKIVKTNVPALEACPQKRGVCTRVYTTTPPKPNSALRKVCRVRL  
HI0914 RITNITDVTPIPHNGCRPPKRRMATINQLVRKPRVVKVKSNNVPALEACPQKRGVCTRVYTTTPPKPNSALRKVCRVRL  
PA3655 KIAISIDVTPIPHNGCRPPKRRMATINQLVRKPRKRMVKSNNVPALEACPQKRGVCTRVYTTTPPKPNSALRKVCRVRL  
PM1985 RITNITDVTPIPHNGCRPPKRRMATINQLVRKPRVVKVKSNNVPALEACPQKRGVCTRVYTTTPPKPNSALRKVCRVRL  
RSc140 KIQVIEDVTPVPHNGCRPPKRRMPTINQLVRKPRVSEKLSKSPALEACPQKRGVCTRVYTTTPPKPNSALRKVCRVRL  
STM021 RITNITDVTPIPHNGCRPPKRRMATVNLVRKPRARKVAKSNVPALEACPQKRGVCTRVYTTTPPKPNSALRKVCRVRL

STY024 RITNITDVTPIPHNGCRPPKRRMATVNLVRKPRARKVAKSNVPALEACPQKRGVCTRVYTTTPPKPNSALRKVCRVRL  
vc2259 RITNITDVTPIPHNGCRPPKRRMATINQLVRKPRARKVAKSNVPALEACPQKRGVCTRVYTTTPPKPNSALRKVCRVRL  
wbr31 KITNITDVTPIPHNGCRPPKRRMVTINQLVRKSRNKIKTNVPALEACPQKRGVCTRVYTTTPPKPNSALRKVCRVRL  
XAC142 KITNITDVTPIPHNGCRPPKRRMTINQLVRKPRQATTYKASAPALDKCPQRRGVCTRVYTTTPPKPNSALRKVCRVRL  
XCC137 KITNITDVTPIPHNGCRPPKRRMATINQLVRKPRQATTYKASAPALDKCPQRRGVCTRVYTTTPPKPNSALRKVCRVRL  
XF2579 KITNITDVTPIPHNGCRPPKRRMATINQLVRKPRQATTYKASAPALDKCPQRRGVCTRVYTTTPPKPNSALRKVCRVRL  
y3135 RITNITDVTPIPHNGCRPPKRRMATINQLVRKPRSMKVAKSNVPALEACPQKRGVCTRVYTTTPPKPNSALRKVCRVRL  
YPO104 RITNITDVTPIPHNGCRPPKRRMATINQLVRKPRSMKVAKSNVPALEACPQKRGVCTRVYTTTPPKPNSALRKVCRVRL  
Z0181 RITNITDVTPIPHNGCRPPKRRMATVNLVRKPRARKVAKSNVPALEACPQKRGVCTRVYTTTPPKPNSALRKVCRVRL

b0170 TNGFEVTSYIGGEGHNLQEHSVLIRGGRVKDLPVRYHTVRGALDCSGVKDRKQARSKYGVKPPAR IAGINIPDHKHAV  
BBp214 TNGFEVTSYIGGEGHNLQEHSVLIRGGRVKDLPVRYHYVIRGALDCSGVKDRKQARSKYGVKPPAR IAGINIPDHKHAV  
Bf131 TNGFEVTCYIGGEGHNLQEHASILIRGGRVKDLPVRYHYVIRGALDCSGVKDRKQARSKYGVKPPAR IAGINIPDHKHAV  
bu232 TNGFEVTAYIGGEGHNLQEHSVLIRGGRVKDLPVRYHYVIRGALDCSGVKDRKQARSKYGVKPPAR IAGINIPDHKHAV  
BUsg22 TNGFEVTSYIGGEGHNLQEHSVLIRGGRVKDLPVRYHYVIRGALDCSGVKDRKQARSKYGVKPPAR IAGINIPDHKHAV  
HI0914 TNGFEVTSYIGGEGHNLQEHSVLIRGGRVKDLPVRYHTVRGALDCAGVKDRKQARSKYGVKPPAR IAGINIPDHKHAV  
PA3655 TNGFEVSSYIGGEGHNLQEHSVLIRGGRVKDLPVRYHTVRGALDCSGVKDRKQARSKYGVKPPAR IAGINIPDHKHAV  
PM1985 TNGFEVTSYIGGEGHNLQEHSVLIRGGRVKDLPVRYHTVRGALDCAGVKDRKQARSKYGVKPPAR IAGINIPDHKHAV  
RSc140 TNGFEVTSYIGGEGHNLQEHSVLIRGGRVKDLPVRYHYVIRGALDCAGVKDRKQARSKYGVKPPAR IAGINIPDHKHAV  
STM021 TNGFEVTSYIGGEGHNLQEHSVLIRGGRVKDLPVRYHTVRGALDCSGVKDRKQARSKYGVKPPAR IAGINIPDHKHAV  
STY024 TNGFEVTSYIGGEGHNLQEHSVLIRGGRVKDLPVRYHTVRGALDCSGVKDRKQARSKYGVKPPAR IAGINIPDHKHAV  
vc2259 TNGFEVTSYIGGEGHNLQEHSVLIRGGRVKDLPVRYHTVRGALDCAGVNDKQARSKYGVKPPAR IAGINIPDHKHAV  
wbr31 TNGFEVTSYIGGEGHNLQEHSSVLLIRGGRVKDLPVRYHYVIRGALDCAGVNDKQARSKYGVKPPAR IAGINIPDHKHAV  
XAC142 TNQEEVTSYIGGEGHNLQEHSVLIRGGRVKDLPVRYHYVIRGALDCAGVNDKQARSKYGVKPPAR IAGINIPDHKHAV  
XCC137 TNQEEVTSYIGGEGHNLQEHSVLIRGGRVKDLPVRYHTVRGALDCAGVNDKQARSKYGVKPPAR IAGINIPDHKHAV  
XF2579 TNQEEVTSYIGGEGHNLQEHSVLIRGGRVKDLPVRYHTVRGALDCAGVNDKQARSKYGVKPPAR IAGINIPDHKHAV  
y3135 TNGFEVTSYIGGEGHNLQEHSVLIRGGRVKDLPVRYHTVRGALDCSGVKDRKQARSKYGVKPPAR IAGINIPDHKHAV  
YPO104 TNGFEVTSYIGGEGHNLQEHSVLIRGGRVKDLPVRYHTVRGALDCSGVKDRKQARSKYGVKPPAR IAGINIPDHKHAV  
Z0181 TNGFEVTSYIGGEGHNLQEHSVLIRGGRVKDLPVRYHTVRGALDCSGVKDRKQARSKYGVKPPAR IAGINIPDHKHAV

b0170 IALTSYIGVGKTRSKAILAAAGIAEDVKISELSEEQIDTLRDEVKFFVEGDLRREISMSIKRMLDLCYRGLRHRRLPV  
BBp214 IALMDVYIGKTRSKLILCLRTNISSEIKLIDLTQDLELLRCEVFFVEGDLRREVTLSIKRLQDLNCRGSRHRKLPV  
Bf131 IALMSIYIGRTRSKLILCLISIGVDEYTKIGQLSDVYIDKMRNEIKYVVEGDLRREVTLSIKRLIDLTGTRGLRHRRLPV  
bu232 IALTAIYIGIKKRSKIFICSIANIPEHSHKIVDLNEEQIDLLRTHVYVIEGDLRREVTLSIKRLIDLTGTRGLRHRRLPV  
BUsg22 IALTSYIGVGKTRSKAILAAAGIAENVKISELSEEQIDTLRDEVKFFVEGDLRREISMSIKRMLDLCYRGLRHRRLPV  
HI0914 IALTAIYIGIKTRSKAICAAAGIAEDVIRELSEEQIDTLRDEVKFFVEGDLRREVTLSIKRLIDLTGTRGLRHRRLPV  
PA3655 ISLTYIYGVGRTTAQSICAAATGVNPAKIKDLSDEQIDQLRNEVKITTEGDLRREINMNIKRLMLDLCYRGLRHRRLPV  
PM1985 IALTAIYIGIKTRAQAI CAATGIAEDVKISELSEEQIDTLRDEVKFFVEGDLRREVTLSIKRLIDLTGTRGLRHRRLPV  
RSc140 IGLTAIYIGRTRSKARKICEATGIPPTDKKVDLTDPPDQDLRKEIKFLVEGDLRREVTLSIKRLIDLTGTRGLRHRRLPV  
STM021 IALTSYIGVGKTRSKAILAAAGIAENVKISELSEEQIDTLRDEVKFFVEGDLRREISMSIKRMLDLCYRGLRHRRLPV  
STY024 IALTSYIGVGKTRSKAILAAAGIAENVKISELSEEQIDTLRDEVKFFVEGDLRREISMSIKRMLDLCYRGLRHRRLPV  
vc2259 IALTAIYIGIKTRSKAILADLGAESVKISELSEEQIDTLRDEVKFFVEGDLRREVTLSIKRLIDLTGTRGLRHRRLPV  
wbr31 IALKKIYIGINVLARKICKKTGINFSKKNVSLDSEIELIRNEVKLKEGDLRREVTLSIKRLIDLTGTRGLRHRRLPV  
XAC142 VGLQSIYIGRTRSKKLCESAGVTSSTTKIRDLSEPEIERLRAEVKFFVEGDLRREIGIAIKRMLDLCYRGLRHRRLPV  
XCC137 VGLQSIYIGRTRSKKLCESAGVTSSTTKIRDLSEPEIERLRAEVKFFVEGDLRREIGIAIKRMLDLCYRGLRHRRLPV  
XF2579 IGLQSIYIGRTRSKKLCESAGVTSSTTKIRDLSEPEIERLRAEVKFFVEGDLRREIGIAIKRMLDLCYRGLRHRRLPV

y3135 IALTAIFGIGKTRSQAICVAAGIAEHVKISELSEEQIEKLRDEVKYVVEGDLRREVTLISIKRMLDGTYRGLRHRRLPV  
YP0104 IALTAIFGIGKTRSQAICVAAGIAEHVKISELSEEQIEKLRDEVKYVVEGDLRREVTLISIKRMLDGTYRGLRHRRLPV  
Z0181 IALTSIYGVGKTRSKAIIAAGIAEDVKISELSEGGQIDTLRDEVKVVVEGDLRREISMSIKRMLDGCYRGLRHRRLPV

b0170 RGQRTKTNARTRKGRPKMAKQSMKAREVVRVALADKYFAKRAELKAIISDVNASDEDRWNAVLKQLTLPDRSSPSRQRNR  
BBp214 RGQRTKTNARTRKGRPKMAKQSMKAREVVRKIKLAKKFYSRREHLKSIISDLSVLEQDRWKAVALKQLTLPDRSSPIRQRNR  
Bf131 RGQRTKTNARTRKGRPKMPKRSVQEREKRLRLINKYFLLRSLLRKCVVDLKVSSSEERWNAVLKQLTLPDRSSPSRQLNR  
bu232 HGQRTKTNARTCKGPRKMAKQSMKAREVVRKLANKFYQRIALKNITINLKLSEERWDAVLKQLIFPRDSSPSRQRNR  
BUsg22 RGQRTKTNARTCKGPRKMAKQSMKAREVVRKLANKFYAQRITAKNTITNLKLESEERWDAVLKQLIFPRDSSPSRQRNR  
HI0914 RGQRTKTNARTRKGVHSMKQSMKARDVVRKLAEKFYAKRAELKAIISDVNASDEDRWDAVLKQLTLPDRSSPSRQRNR  
PA3655 RGQRTKTNARTRKGRPKMAKESMKNRDLKRLQTLVAKYAKRAELKAIISANPNSSAEERWNAVLKQPRDASASRLNR  
PM1985 RGQRTKTNARTRKGRPKMAKQSMKARDVVRKLAEKFYAKRAELKQIISDVNASDEDRWNAVLKQLTLPDRSSPSRQRNR  
RSc140 RGQRTKTNARTRKGRPKVAKLSLIEREKRAKLVAKYAEKRAALEAIVADQSKSEERYEARLKLQQLPRNANPTQRNR  
STM021 RGQRTKTNARTRKGRPKMAKQSMKAREVVRVALADKYFAKRAELKAIISDVNATDEDRWNAVLKQLTLPDRSSPSRQRNR  
STY024 RGQRTKTNARTRKGPCKMAKQSMKAREVVRVALADKYFAKRAELKAIISDVNATDEDRWNAVLKQLTLPDRSSPSRQRNR  
vc2259 RGQRTKTNARTRKGRPKMAKQSMKAREKRAKLVQFAEKRAATLKAIIISDVNASDEDRWNAVLKQLTLPDRSSPSRQRNR  
wbr31 RGQRTKTNARTRKGRPKVTRKSIQEREKRIKLAFLAKFLYKRAELKAIISDPNIGNDIRWNAVLKQLTLPDRSSPSRQRNR  
XAC142 RGQRTKTNARTRKGRPKMAKTSMIHRDIKRAKLAFFAGKRDALKKILSSQDASYEEKIDASTKLQKLPDRSSPSRHRNR  
XCC137 RGQRTKTNARTRKGRPKMAKTSMIHRDIKRAKLAFFAGKRDALKKILSSQDASYEEKIDASTKLQKLPDRSSPSRHRNR  
XF2579 RGQRTKTNARTRKGRPKMAKISMINRDLKRLKAKFADKRLSLKVIISDASSYEEKIEASCCKLQKLPDRSSPSRHLNR  
y3135 RGQRTKTNARTRKGRPKMAKQSMKAREVVRVRLANKYRAKREELKAIISGVNSSDEDRWDAVLKQLTLPDRSSPSRQRNR  
YP0104 RGQRTKTNARTRKGRPKMAKQSMKAREVVRVRLANKYRAKREELKAIISGVNSSDEDRWDAVLKQLTLPDRSSPSRQRNR  
Z0181 RGQRTKTNARTRKGRPKMAKQSMKAREVVRVALADKYFAKRAELKAIISDVNASDEDRWNAVLKQLTLPDRSSPSRQRNR

b0170 CRQTRPHGFLRKFGLSRKIVREAAAMRGEIPLGKASWEATAKIVSEFGRANDTGSTEVQVALLTAQINHLQGHFAEHKK  
BBp214 CSQTRPHAFRLKFLSRKIVREAAAMRGEIPLGKSSWNKSKIIITQFVSKDSGKSEVQIALLTNRINYLQNHFLHKK  
Bf131 CGRTRPHAFRLKFLSRMKVREAAAMRGEIPLGKSSWEQKSKIIILKFGFIKNTGITTEVQVALLTQRINALKSHFNKHKQ  
bu232 CRQTRPHAFRLKFLSRKIVREAAAMRGEIPLGKASWIDTKKIIILKYGKQNSGITTEVQVALLTQINYLQIHFQSHKK  
BUsg22 CRQTRPHAFRLKFLSRKIVREAAAMRGEIPLGKASWMTIKETILKYGKQNSGITTEVQIALLTQINHLQGHFSQHKK  
HI0914 CRQTRPHGFLRKFGLSRKIVREAAAMRGEIPLGKASWEKAAIVAEFGRAKDTGSSEVQIALLTAQINHLQTHFAEHKK  
PA3655 CRLTRPHGFLRKFGLSRKILREAAAMRGEVPLGKASWEKAAQIVNEFYKQEGDTSSEVQVALLSANINKLQDHFKAANG  
PM1985 CRQTRPHGFLRKFGLSRKIVREAAAMRGEIPLGKASWEATAKIVSEFGRANDTGSTEVQVALLTAQINHLQGHFAEHKK  
RSc140 CSITGRPRGTFRKFGLARNKLEIAFKGEIPLGKASWINKQEVVKQFARTNDTGSSEVQVALLTARINELTPHFKAHMK  
STM021 CRQTRPHAFRLKFLSRKIVREAAAMRGEIPLGKASWEATAKIVSEFGRANDTGSTEVQVALLTAQINHLQGHFAEHKK  
STY024 CRQTRPHAFRLKFLSRKIVREAAAMRGEIPLGKASWEATAKIVSEFGRANDTGSTEVQVALLTAQINHLQGHFAEHKK  
vc2259 CNQTRPHGFLRKFGLSRKIVREAAAMRGEIPLGKASWETKAAIVAEYARENDTGSSEVQIALLTASINHLQGHFAEHKK  
wbr31 CSQTRPHAFRLKFLSRKILREAAAMRGEIPLGKSSWKNKNSYKETLHLNLIKEDSEKQITLLTLEIKSLQGHFLENKN  
XAC142 CELSGRPRGVYRKFGLGRNMLRKATMNGDVPGLRKASWVDTQKVIEDNKRAQDTGSSEVQVALLTAQINHLQGHFKTHKK  
XCC137 CELSGRPRGVYRKFGLGRNMLRKATMNGDVPGLRKASWVDTQKVIEDNKRAQDTGSSEVQVALLTARIELLTHGFKTHKK  
XF2579 CEISGRPRGVYRKFGLGRNMLREAAAMRGEVPLGKASWIDTQSIENNKRAHDTGSSEVQVALLTARIELLTHGFKTHKK  
y3135 CNQTRPHGFLRKFGLSRKIVREAAAMRGEIPLGKASWEATAKIVSEFGRANDTGSTEVQVALLTAQINHLQGHFSEHKK  
YP0104 CNQTRPHGFLRKFGLSRKIVREAAAMRGEIPLGKASWEATAKIVSEFGRANDTGSTEVQVALLTAQINHLQGHFSEHKK  
Z0181 CRQTRPHGFLRKFGLSRKIVREAAAMRGEIPLGKASWEATAKIVSEFGRANDTGSTEVQVALLTAQINHLQGHFAEHKK

b0170 DHHSRRGLLRMVSRKRLLDYLKRRKDVARYTQLIERLGLRMVITRLARHGAKKRPFYQVVVADSRNARNRGRFIERVGFNF  
BBp214 DHCSRGLLNMVSKRRKLLNLYLKDENISRYTNIINQLKRLMVKIRLVRGAKKRPFYKIVIADSRYPNKGPIEKIGFFN  
Bf131 DHHSRRGLLHVTRRRKLLKYLKKSVDLRYNNLIESLALRMVIRLARHGAKKSPFYIIVVTDSSRNRDGRFIERIGFFN  
bu232 DHCSRGLLNMVSKRRKLLDYLKKNISRYTNIINQLKRLMVKIRLARYGTKKRPFYKLVVADSRFRNGRFIERLGYFN  
BUsg22 DHCSRGLLNMVSKRRKLLNLYLKKNISRYTNIINQLKRLMVIRLALYGTKRPFYKVVVADSRFRDGRFIERLGHFN  
HI0914 DHHSRRGLLRMVSRKRLLDYLKRTDLALYQSTIARLGLRMVITRLSRGGAKKRPFYQIVVADSRSPRDGRFIERVGFNF  
PA3655 DHHSRRGLLRMVSRKRLLDYLKGGKDVSRYTALIGRLGLRMVITRLARHGAKKRPFYHLLVTNRSNARDGRFVERIGFFN  
PM1985 DHHSRRGLLRMVSRKRLLDYLKRTDLALYQSTIARLGLRMVITRLSRGGAKKRPFYQIVVADSRSPRDGRFIERVGFNF  
RSc140 DHHSRRGLLRMVSRKRLLDYLKKNADRYRSLIEKLRGLRMVITRLARHGAKKRPFYIIVVADSRSPRDGRFIERVGFNF  
STM021 DHHSRRGLLRMVSRKRLLDYLKRRKDVARYTALIERLGLRMVITRLARHGAKKRPFYQVVVTDSSRARNRGRFIERVGFNF  
STY024 DHHSRRGLLRMVSRKRLLDYLKRRKDVARYTALIERLGLRMVITRLARHGAKKRPFYQVVVTDSSRARNRGRFIERVGFNF  
vc2259 DHHSRRGLLRMVSRKRLLDYLKGGKDVSRYTALIGRLGLRMVITRLARHGAKKRPFYQIVVADSRSPRDGRFIERVGFNF  
wbr31 DLHSRRGLLKKVSRKRLNLYLKRKNMRYFDLIEKLRGLRMVITRLSRGKSNKRPFYQIVASDNKRPDGRFIEKLGFFN  
XAC142 DHHSRRGLLQMVNRRRSLDYLKKNADRYRSLIEKLRGLRMVITRLTRGGAKKRPFYHIIIVTDVRSARDGRNIERLGYFN  
XCC137 DHHSRRGLLQMVNRRRSLDYLKKNADRYRSLIEKLRGLRMVITRLTRGGAKKRPFYHIIIVTDVRSARDGRNIERLGYFN  
XF2579 DHHSRRGLLQMVNRRRSLDYLKKNADRYRSLIEKLRGLRMVITRLTRGGAKKRPFYQIVTDSSRNRDGRNIERVGHYN  
y3135 DHHSRRGLLRMVSTRKRLLDYLKRRQDVARYASLIERLGLRMVITRLARHGAKKRPFYQVVVTDSSRARNRGRFIERVGFNF  
YP0104 DHHSRRGLLRMVSTRKRLLDYLKRRQDVARYASLIERLGLRMVITRLARHGAKKRPFYQVVVTDSSRARNRGRFIERVGFNF  
Z0181 DHHSRRGLLRMVSRKRLLDYLKRRKDVARYTRLIERLGLRMVITRLARHGAKKRPFYQVVVADSRNARNRGRFIERVGFNF

b0170 ASEKEEGTRLDLDRIAHWVQGATISDRVAALRTLQGRVVS DKMEKSI VVAIERFVKHPIYKGFIRKRTTKLHVHDENNEC  
BBp214 SIKHPPQICINTLRI THWIKNGAIMSKRVKRLRTLSGQVINSKMQKSAIVSIKRLIKHPLYKFKVKTTKLCIH DENNQ  
Bf131 ELDIKRLRNLDRVRYWLSNGAQPSDRVFLVHLVQGIIVRSKMQKSI VVSINRIKHSMYKFIINRTTKIYVHDTNNIS

bu232 AKGKSEILKLNLERIEHWTNQAQMSERTKRLTLQGRVINSKMQKSAVVAIERFVKHPIYKGFIRKRTTKLHVHDEKNEC  
BUsg22 SKCQNSTLKLNLNRIEYWQGGQAQISKRSQKRLTLQGRVITSNKMNKSAVVAIERFVKHPIYKGFVKTTKLHVHDEKNEC  
HI0914 AQGNAERLRINLERVNHVWVQAGASLSDRVASLRSVQGVVSDKMEKSFVVAIERKVKHPLYKGFIRRTTKLHVHDENNEA  
PA3655 ATGGEVRLSVDQERATYWLQGAQPSERVAQLRRTLGRVVS DKMDKT VTVLIERVKHPIYKGVKRS TKLHAHDESQC  
PM1985 ATGNAERLRLLDRVNAWVEKASLSDRVASLRSVQGVVSDKMDKSFVVAIERKVKHPLYKGFIRRTTKLHVHDENNEA  
RSc140 ATEGEEGLRIAQDRLSYWQGVGAQLSPTVARLRTLGRVVS SKMDKT VTVLVENRKHPLYKGVVRSKXYVVAHDEANQY  
STM021 ASEKEEGTRLDLDRIAHWVQGATISDRVAALRTLQGRVVS DKMEKSI VVAIERFVKHPIYKGFIRKRTTKMHHVHDENNEC  
STY024 ASEKEEGTRLDLDRIAHWVQGATISDRVAALRTLQGRVVS DKMEKSI VVAIERFVKHPIYKGFIRKRTTKMHHVHDENNEC  
vc2259 ATGEEGLRLDLDRVNHVWVQAGASLSDRVASLRSVQGVVSDKMDKSI VVAIERMVKHPIYKGFIRRTTKLHVHDENNEC  
wbr31 SIEKSKKIFIKTDRINLWMSKGAKLSDRVKNLQILKGSVIKKNMQKSI VVSVERFVKHPIYKFKMKTTKLHVHDENNSS  
XAC142 AQGAEPRIIVLDVARVDHWVNGAQLTDKVRNLRVTEGRVVS SKMDKT VTVLVERQVKHALYKGYIKRSTKLHAHADNAC  
XCC137 AQGAEPRIIVLDVARVDHWVNGAQLTDKVRNLRVTEGRVVS SKMDKT VTVLVERQVKHALYKGYIKRSTKLHAHADNAC  
XF2579 AQGAESRVVNLMARVEHVVKNQAQLTDKVRSLRTIKGRVINSKMQKTVTVLVERQIKHALYKGYIKRSTKLHAHADNAC  
y3135 ASGQAEALRLDLDRIEHWIGLGTAVSDRVSVLRTLQGRVVS DKMEKSMVVAIERVVKHPIYKGFIRRTTKLHVHDENNEC  
YP0104 ASGQAEALRLDLDRIEHWIGLGTAVSDRVSVLRTLQGRVVS DKMEKSMVVAIERVVKHPIYKGFIRRTTKLHVHDENNEC  
Z0181 ASEKEEGTRLDLDRIAHWVQGATISDRVAALRTLQGRVVS DKMEKSI VVAIERFVKHPIYKGFIRKRTTKLHVHDENNEC

b0170 GIGDVEIRECRPLSKTKSWTLVFRFRKFCRFTAEGVQIEIDYKDIATLKNYITESGKIVPSRITGTAKYQRLARAIKR  
BBp214 SFGDIVEIRECRPLSKTKSWMLVFRFRKFCRFTVEKIKEIDYKDLMLKNYITESGKIVPSRITGTSARYQRLARAIKR

Bf131 NVGDIVEITECRPI SKTKCWKLTIRHRKFCRFTAADKCIYVDYKDL SKIQHSI IENAKIIPSRITGTRSKYQRLARA IKI  
bu232 TVGDLEI ERESRPI SKTKSWLVFRFRKFCRFTAEGVQ EIDYKDIAVLKNYITESGKIVPSRITGTRAKYQRLSRAIKR  
BUsg22 SIGDLIEI ERESRPI SKTKSWLVFRFRKFCRFTAEGIQEIDYKDIAMLKNYITENGKIVPSRITGTRAKFQRQLSRAIKK  
HI0914 KVGDTV EIRECRPLSKTKSWLVFRFRKFCRFTAENVEIDYKDIA TLKNYISESGKIVPSRITGTRAKYQRLARA IKR  
PA3655 RIGDLVTEIRTRPLAKTKAWTLVFRFRKFCRFTAEGVKEIDYKDLNLT LKAYVSETGKIVPSRITGTRAKYQRLATAIKR  
PM1985 KLG DIVEI KE CRPLSKTKSWLVFRFRKFCRFTAENVEIDYKDVATLKNYITESGKIVPSRITGTRAKYQRLARA IKR  
RSc140 KEGDRVEI VESRPI SRTKAWVVSFKRKKFCRFTAEGVQ EIDYKDLDTL KDFIGENK ITPARLTGTRASHYQRLD LTAIKR  
STM021 GIGDVVEI ERECRPLSKTKSWLVFRFRKFCRFTAEGVQ EIDYKDIA TLKNYITESGKIVPSRITGTRAKYQRLARA IKR  
STY024 GIGDVVEI ERECRPLSKTKSWLVFRFRKFCRFTAEGVQ EIDYKDIA TLKNYITESGKIVPSRITGTRAKYQRLARA IKR  
vc2259 GIGDVVEI ERECRPLSKTKSWLVFRFRKFCRFTAEGVQ EIDYKDVATLKNYITEAGKIVPSRITGTS AKYQRLARA IKR  
wbr31 KVGDVVEI QECRPI SKTKSWKLI FRFRKFCRFTLEK INNIDYKDI ILLKNYITENGKIVPSRITGTRAKYQRLSRAVKKR  
XAC142 NEG DVVRVTEI APMSKTKNWRVFRFRKFCRFTAEGVKEIDYKDLNLT LRQYLTENGKIVPSRVTGTSKYQRLATAVKKR  
XCC137 NEG DVVRVTEI APMSKTKNWRVFRFRKFCRFTAEGVKEIDYKDLNLT LRQYLTENGKIVPSRVTGTSKYQRLATAVKKR  
XF2579 NEG DVVTEI VAPISKTKNWRVFRFRKFCRFTAEGVKEIDYKDLNLT LRQYLTENGKIVPSRVTGTSKYQRLATAVKKR  
y3135 GIGDVVEI ERECRPLSKTKSWLVFRFRKFCRFTAEGVVEIDYKDIA TLKNYITESGKIVPSRITGTRAKYQRLARCIKR  
YPO104 GIGDVVEI ERECRPLSKTKSWLVFRFRKFCRFTAEGVVEIDYKDIA TLKNYITESGKIVPSRITGTRAKYQRLARCIKR  
Z0181 GIGDVVEI ERECRPLSKTKSWLVFRFRKFCRFTAEGVQ EIDYEDIA TLKNYITESGKIVPSRITGTRAKYQRLARA IKR

b0170 ARYLSLLPYTDRHMPRSLKKGPFIDLHLLKKEKAVESKPLRTWSRRSTIFPNMIGLTI AVHNGRQHVPVVTDEMVGH  
BbP214 ARYLSLLPYTDQHVPRSLKKGPFIDLALLRVEQAVEIKKPI RTWSRRSTIFPKMVGTLMLI HNGRQHIPVITEDMVGH  
Bf131 ARFLSLLPYIDQNMSRLRKGPFIDLHLLRKEKVIKTKKPI RTWSRRSTIFPKMIGLTI SVHNGKQHIPVITSDMVGH  
bu232 ARYLALLPYTDQHMPRSLKKGPFIDLHLLKKEKSVKIKKPI KTWSSRRSTIFPNMVGLTIS IHNGRSHIPVITTEEMVGH  
BUsg22 ARYLALLPYTDQHMPRSLKKGPFIDVSLKKEKAVKIKKPLKTLWSRRSTVFPNMVGLTISVHNGRHHIPIPI TEEMVGH  
HI0914 ARYLALLPYTDNHMPRSLKKGPFIDLHLLKKEKAVESKPKI KTWSSRRSMIIPSMIGLTI AVHNGRQHVPVVSDEMIGH  
PA3655 ARYLALLPYTDSHVPRSLKKGPFIDLHLLKKEKAVAKRKP IKTWSRRSMILPHMVGLTIAVHNGRQHVPVVLNDEMVGH  
PM1985 ARYLALLPYTDNHMPRSLKKGPFIDLHLLKKEKAVESKPKI KTWSSRRSMIIPSMIGLTI AVHNGRQHVPVVSDEMIGH  
RSc140 ARFLALMPYTDQHMTSRAKKGPFIDAHLKKEVEAAGGKPKI KTWSSRRSTILPDFIGLTI AVHNGRQHVPVVTENMVGH  
STM021 ARYLSLLPYTDRHMPRSLKKGPFIDLHLLKKEKAVESKPLRTWSRRSTIFPNMIGLTI AVHNGRQHVPVVTDEMVGH  
STY024 ARYLSLLPYTDRHMPRSLKKGPFIDLHLLKKEKAVESKPKI KTWSSRRSTIFPNMIGLTI AVHNGRQHVPVVSDEMVGH  
vc2259 ARYLALLPYTDKHMPSLKKGPFIDLHLLKKEKAVESKPKI KTWSSRRSMIIPMIGLTI AVHNGRQHVPVVTDEMIGH  
wbr31 ARYLSLLPYTDHMPRSLKKGPFIDFHLKKEIEEKQTKKLI RTWSRRSTIFPDMIGMTISVHNGKQHIPVITIGDEMVGH  
XAC142 ARFLALIPYTDNHMPRSLKKGPFVDHLLKKEVEAAGSKPKI KTWSSRRSMILPEMVGITIAVHNGKNIHIVLVNENMVGH  
XCC137 SRFLALIPYTDNHMPRSLKKGPFVDHLLKKEVEAAGSKPKI KTWSSRRSMILPEMVGITIAVHNGKNIHIVLVNENMVGH  
XF2579 ARFLALIPYTDNHMPRSTKKGPFVDHLLKKEVEAAGSKPKI KTWSSRRSVILPQMVGHTIAIHNGKNYIPVIVINENMVGH  
y3135 ARYLSLLPYTDRHMPRSLKKGPFIDLHLLKKEKAVESKPKI KTWSSRRSTVFPNMIGLTI AVHNGRQHVPVVSDEMVGH  
YPO104 ARYLSLLPYTDRHMPRSLKKGPFIDLHLLKKEKAVESKPKI RTWSRRSTVFPNMIGLTI AVHNGRQHVPVVSDEMVGH  
Z0181 ARYLSLLPYTDRHMPRSLKKGPFIDLHLLKKEKAVESKPLRTWSRRSTIFPNMIGLTI AVHNGRQHVPVVTDEMVGH

b0170 KLGEFAPTRTYRGHAADKKAKANIKS AKKRAIQSEKARKHNASRRSMMRTF IKKVYAAIEAGDKAAAQKAFNEMQPIVDR  
BbP214 KLGEFVLTTRTYRGHTADKKVKANIKSSKDSIKSRKKKLNLSAKKSMIKTLIKKVKI AILSGDKLSELAFSKIQPILDR  
Bf131 KLGEFAPTRTYRGHSVDKKIKANTKSAKKFI IKS KNRNRNLSNRSMKLTIFIKKVNIA INSGRSHIPVITAFKNMQCIDR  
bu232 KLGEFSLTRTYRGHTADKKVKANIKS AKKDALTSEKRRKKNSSRRSMIRTFVKKVRVAIMSGNKTAEADAFKMQPIIDS  
BUsg22 KLGEFSLTRTYRGHTADKKVKANIKS AKKDSI ISEERRKNASQRSKMRTF IKKVRILAISSGDKESYDAFKMQPIIDK  
HI0914 KLGEFAPTRTYRGHAADKKAKANIKS AKKRAIQSEKRRQHNASRRSMMRTYIKKVYAAQVAAGEKSAEAFVEMQKVDR  
PA3655 KLGEFAATRTYRGHAADKKAKANTPSAKKRAKQAEKRRSHNASLSMVRTYIKNVVKAIDAKDLEKAQAFTAAPVDR  
PM1985 KLGEFAPTRTYRGHAADKKAKANIKS AKKRAIQSEKRRQHNASRRSMMRTYIKKVYAAVAAGDKSVAEKAFVEMQKVDR  
RSc140 KLGEFALTRTFKGHAADKKAKANTAQAKKRAQAVVQNAHNSALRSRLRTAVKAVRKA IAGDKAAAANVFQAQSTIDS  
STM021 KLGEFAPTRTYRGHAADKKAKANIKS AKKRAVQSEKARKHNASRRSMMRTF IKKVYAAIEAGDKAAALKAFNEMQPIVDR  
STY024 KLGEFAPTRTYRGHAADKKAKANIKS AKKRAVQSEKARKHNASRRSMMRTF IKKVYAAIEAGDKAAALKAFNEMQPIVDR  
vc2259 KLGEFAPTRTYRGHAADKKAKANIKS AKKRAIQSEKRRQHNASRRSMMRTYMKKTVAIA IAGDKAAAANVFQAQSTILDR  
wbr31 KLGEFVPTRTYRGHSADKKIKANIKSSKRSIQSEKRRKYNSSKSMIRSF IKKVKN SILKKEKDTINNSF IEMQSI LDR  
XAC142 KLGEFVTRTFKGHGDKKSGANIKS AKKRAQTVVNERNTGQRSMRLRTAVKVKI KALDANDAAGAEAAFAVAQPI LDR  
XCC137 KLGEFVTRTFKGHGDKKSSANIKS AKKRAQTVVNERNTGQRSMRLRTAVKVKI KALDANDAAGAEAAFAVAQPI LDR  
XF2579 KLGEFSITRVFKGHGDKKSGANIKS AKKRVKQTVVNERNTAQRSMRLRTAVKVKI KALS IKDIAGAETAFAVAQPI LDR

y3135 KLGEFAPTRTYRGHAADKKAKANIKS AKKRAVQSEKRRKHNASRRSMMRTF IKKVYAAIAAGDKDAAQKAFNEMQPIVDR  
YPO104 KLGEFAPTRTYRGHAADKKAKANIKS AKKRAVQSEKRRKHNASRRSMMRTF IKKVYAAIAAGDKDAAQKAFNEMQPIVDR  
Z0181 KLGEFAPTRTYRGHAADKKAKANIKS AKKRAIQSEKARKHNASRRSMMRTF IKKVYAAIEAGDKAAAQKAFNEMQPIVDR

b0170 QAAKGLIHKNAARHKANLTAQINKMPVIK VRENFDVALRRFKRSCEKAGVLA EVRREFYEKPTTERKRAKASAVKRR  
BbP214 YSAGL I HKNAARHKS NLCK INAMP I KVRDNFDVALRRFKRSCEKAGILSEIRREFYEKPTTERKRAKASAIKRR  
Bf131 QSIKGLIHKNAARCKSIFRRI SLMPIK VRENFDVALRRFKRSCEKAGILSEIRREFYEKPTTERKRAKASAIKRR  
bu232 HVNGLIHKNAARYSNLSQLIKKMPIK VRENFDVALRRFKRSCEKAGILAEIRREFYEKPTTERKRAKASAVKRR  
BUsg22 YATKGLIHKNAARYSILSFKIAKMPIK VRENFDVALRRFKRSCEKAGILAEIRREFYEKPTTERKRAKASAIKRR  
HI0914 MASKGLIHKNAANHSKLAQA I KMPVIK VRENFDVALRRFKRSCEKAGILAEVRAREFYEKPTTERKRENATLAKRR  
PA3655 MADKGIHKNAARHSRLSGHIKAMPVVKENFDVALRRFKRSCEKAGVLA EVRREFYEKPTTERKRAKAAA AVKRR  
PM1985 MASKGLIHKNAANHSKLAQA I KMPVIK VRENFDVALRRFKRSCEKAGILAEVRSREFYEKPTTERKRENATRKRRE  
RSc140 IADKKI VHKNAARAKSRLSAAIKAMT IRLKENVEVALRRFRRE IERTGLIKELRARTAEKPTTERKRAKAAA VSRRS  
STM021 QAAKGLIHKNAARHKANLTAQINKMPVIK VRENFDVALRRFKRSCEKAGVLA EVRREFYEKPTTERKRAKASAVKRR  
STY024 QAAKGLIHKNAARHKANLTAQINKMPVIK VRENFDVALRRFKRSCEKAGVLA EVRREFYEKPTTERKRAKASAVKRR  
vc2259 MATKGLIHKNAARHSRFFA INAMPVVK VRENFDVALRRFKRSCEKAGILSEVRRREFYEKPTTERKRAKAAA QKRR  
wbr31 YAKKNIHKNASRLSKSRIKMP I I K VRENFDVALRRFKRSCEKAGILSEVRRREFYEKPTTERKRAKASAIKRR  
XAC142 FSARGLIHKNAARHSRLTARIKAMP SVK VRENFEFALRRFKRTCEKAGVLAETRRREFYEKPTQERKRKAAA AVKRR  
XCC137 FSARGLIHKNAARHSRLTARIKAMP SVK VRENFEFALRRFKRTCEKAGVLAETRRREFYEKPTQERKRKAAA AVKRR  
XF2579 FSSRGLIHKNAARHSRLTARIKAMP SVK VRENFEFALRRFKRI CEKAGILAE TRKREFYEKPTQERKRKAAA AVKRR  
y3135 QSCKGLIHKNAARHSNLVAQINAMPVIK VRENFDVALRRFKRSCEKAGVLA EVRREFYEKPTTERKRAKASAVKRR  
YPO104 QSCKGLIHKNAARHSNLVAQINAMPVIK VRENFDVALRRFKRSCEKAGVLA EVRREFYEKPTTERKRAKASAVKRR  
Z0181 QAAKGLIHKNAARHKANLTAQINKMPVIK VRENFDVALRRFKRSCEKAGVLA EVRREFYEKPTTERKRAKASAVKRR

b0170 NARASLVKELRERTGAGMMDCKALTEANGDIELAIENMRKSGA IKA AKKAGNVADGVIKTKGII LEVNCQTD FVAKDAG  
BbP214 NLKAFVKKLRARTGVGIMDCRALMCMKGDIDKSVDFLRKMGQIKAEKKQFLLTNGSIFISGVMLELSSETDFVSKHKD  
Bf131 QLKSDLIRELRKRTSVS I KCKQALIDSNQDIELA IDNMRKSGLQTD I QSNRLTSLG IAIKGLMIEINCE TDFVSRNSM  
bu232 NARTGLIHKNSRTGAGFLACKRLEENGDIEA IDNLRSGKLTAEKKNINNTQGAIFSKGVLELNCQTD FVSKDNL  
BUsg22 NARALLIKELRLRTGAGFMECKRALIEEKGDIELS IDNLRSGQARA EKKIHNITQGLIFAKGAMVELNCQTD FVAKDTL  
HI0914 NARASLVKELRERTGAGMMECKALTEANGDIELA IDNMRKSGQAKAAKAGRVAE GVL IARGVLEVMNCETDFVAKDAG  
PA3655 QRRAMVKELRERTGLGMECKALTEANGDIEKA IDDMRAAGAIKAAKAGNIAEGS IAVKAVI IEVNSQTD FVAKDAG  
PM1985 NARASLVKELRERTGAGMMECKALVEANGDIELA IDNMRKSGQAKAAKAGRVAE GVL IARGVLEVMNCETDFVAKDAG

RSc140 QMLASMVAELRAKTDAPMMECKKALTEAEGNMEKAEIILRVKLGKAGKAAARITEGVIA SFALVELNCETDFVSRNDD  
 STM021 NARASLVKELRERTGAGMMDCKKALTEANGDIELA IENMRKSGAIKAAKKAGNVADGVIKTKAFILVNCQTFVAKDAG  
 STY024 NARASLVKELRERTGAGMMDCKKALTEANGDIELA IENMRKSGAIKAAKKAGNVADGVIKTKAFILVNCQTFVAKDAG  
 vc2259 NARAALVKELRERTGAGMMECKKALVETNGDIELA IENMRKSGAAKAAKAGNIAEGTIMIKAAALVEVNCQTFVAKDSN  
 wbr31 NLKSNLIKEMRNRTLGI L ECKKALLENNENIELA IQF IKKSGTLNIEKNVNNLSNGI VLAKGALIELNSETFVAKNKQ  
 XAC142 VTKASLVKELRERTGAGMMECKKALVENAGDIDAAA EWLKRSGLAKADKKADRVAEGRIATAAVLVEVNSETDFVAKDEN  
 XCC137 VTKASLVKELRERTGAGMMECKKALVENAGDIDAAA EWLKRSGLAKADKKADRVAEGRIATAAVLVEVNSETDFVAKDEN  
 XF2579 VTKASLVKELRERTGAGMMECKKALVENAGDIDAAA EWLKRSGLAKADKKADRVAEGRIATAAVLVEVNSETDFVAKDSH  
 y3135 NARAALVKELRERTAAGMMECKKALVEANGDIELA IDNMRKSGQAKAAKKAGRIAEIGILAKGVILELNCETDFVAKDAG  
 YP0104 NARAALVKELRERTAAGMMECKKALVEANGDIELA IDNMRKSGQAKAAKKAGRIAEIGILAKGVILELNCETDFVAKDAG  
 Z0181 NARASLVKELRERTGAGMMDCKKALTEANGDIELA IENMRKSGAIKAAKKAGNVADGVIKTKGILVNCQTFVAKDAG

b0170 FQAFADKVLDAAVAGKIVEVLEEEERVALVAK IGENINIRRVAALEGGSYQARIGVLVKHIAMHVAASKPEFIKPEDVSAE  
 BbP214 FLCLGEEKILDYVLTHPMIEFIEDLRTSLVMQVNIENIVIRRIQTLNKTGYLRRIGVLVKEIAMHIAASNPKYLRSDLVPKS  
 Bf131 FREFINTVMVTALNESIINAL EEQRLFLMNGIGENIKIRRFVFLIGSSYISRIGVLVKHVAMHIAARNPKYVGVSNISED  
 bu232 FICLGEDILVLEALEKRIINQLESRRTELVSXVGENINIRRFHLIEGFSYLVRIGVLVKNIAMHIAASKPEYLHPKKNVSE  
 BUsq22 FYSLGKEIILTALSKKIIDDI EIKKTELIVKTGENIKINRFSFIEGYSYIGRIGVLVKNIAMHIAASKPEYLSPNDISDS  
 HI0914 FLGLANEVTDFAAANKGIEALEEKRAALVAK IGENMNIRRVAYLDGAQYLAKIGVLVKKVAMHVAASKPEFVNPEDVSAE  
 PA3655 FKGFVAESLEKAFNEKLAAPLEEARLALVAKTGENVNIIRRLTRVEGGAYLHRIGVVVKDIAMHVAASNPKYLSASEVSEE  
 PM1985 FLGLANEVADYALANKGIEALEEKRAALVAK IGENMNIRRVAYLDGAQYLAKIGVLVKKVAMHVAASKPEFVNPEDVSAE  
 RSc140 FLGFANEIAKLIATQNPVAALEAVRTRLIGK IGENMTIRRFQRFEGASYLTRIGVMVKDAMHAAAMKPVALLSSDEVPAE  
 STM021 FQAFADKVLDAAVAGKIVEVLEEEERVALVAK IGENINIRRVASLEGGSYQARIGVLVKQLAMHVAASKPEFVKPEDVSAD  
 STY024 FQAFADKVLDAAVAGKIVEVLEEEERVALVAK IGENINIRRVASLEGGSYQARIGVLVKQLAMHVAASKPEFVKPEDVSAD  
 vc2259 FVAFANQVTDAAALASKAVEELEEARVALVAK IGENINIRRVQYVEGATYRDRIGVVVKHVAMHVAASRPEFLTPDDVPAE  
 wbr31 FQNFGEIISIILKEKIIDILKEKISYFSLTFKKEINIKR ICLFYGFNYIKRIGVLVKKIAMHIAASNPKYISVKSIPNI  
 XAC142 FLAFTVAVANAALNSDAAEALEERRAAVIAK VGENLQVRRRLVRIIDSAAYVGRIGVLVIRGIAAMHIAAMNPPHVKASDVPAE  
 XCC137 FLAFTDVVANAALNSDAADALEERRAAVIAK VGENLQVRRRLVRIIDSAAYVGRIGVLVIRGIAAMHIAAMNPPHVKASDVPAE  
 XF2579 FLAFAEAVAQAALVAGAVEALEEARAAVIAK IGENVVRRLARIDSAAYVGRIGVLVIRGIAAMHIAAMNPPYKNAVADSAE  
 y3135 FKAFGEVINAALAEKIIDVLEEQANLVAK IGENINIRRVAVLEGGTYLARIGVMVKHIAMHIAASKPEYVKKPDDVPAE  
 YP0104 FKAFGEVINAALAEKIIDVLEEQANLVAK IGENINIRRVAVLEGGTYLARIGVMVKHIAMHIAASKPEYVKKPDDVPAE  
 Z0181 FQAFADKVLDAAVAGKIVEVLEEEERVALVAK IGENINIRRVAALEGGSYQARIGVLVKHIAMHVAASKPEFIKPEDVSAE

b0170 VVEKEYQVQLDIAMQKPKETAEK MVEGRMKKFTGEVSLTGQPFVMEPSKTVGQ LLEHNAEVTGFI RFEVGE G  
 BbP214 IMEREYEQLELAMQKSKPILEKIIKGRMIKFANEISLLGQNFIFD PHRKVSEVIKNNIDV ISFVRYEVGEG  
 Bf131 IMIRERHIQMDIAK KKKDPEILEKIVEGRMEKFMSEIVLEKQDFVMDINRTVGSILEYCIKINNFVRF EIGDN  
 bu232 VFQREYQIQLELAKNNKPSNLLKKIIDGRMEK FVNNISLTSQSFIMNPIKTVGDILENHAHIESFIRFELGEL  
 BUsq22 VFKREYEQLELAKNNKSS EILKKIVQGRMNK FVNDISLVGQKFI MDNTKTVGALLEYNARIISFIRFEIGDK  
 HI0914 VVEHERQIQIDIAINGKPKETAEK MVEGRMKKFTGEVSLTGQAFVMDPSVSVGDFLSVNTSVSNFIRLEVGE G  
 PA3655 AIAKEKEIFLALNADGKPENIVENMVKGRISKFLAEASLVEQPFVKNPEVKVGD LAQAGAEIVSFVR YEVGEG  
 PM1985 VVAKEREIQVAIAMEGKPREIAEK MVEGRMKKFTGEVSLTGQPFVMDPAKSVGEFLESGADVTN FVRFVGE G  
 RSc140 LIAKERSIAEQKAAEGKPAEIVAKMVEG SVQYKYLKEVSLLNQPFVKNKQTV EQMLAANTVKGFTL FVVGE G  
 STM021 VVEKEYQVQLDIAMQKPKETAEK MVEGRMKKFTGEVSLTGQPFVMEPSKSVGQ LLEHNAEVTGFI RFEVGE G  
 STY024 VVEKEYQVQLDIAMQKPKETAEK MVEGRMKKFTGEVSLTGQPFVMEPSKSVGQ LLEHNAEVTGFI RFEVGE G  
 vc2259 VVAKEREVQGIAMNGKSKETAEK MVEGRMKKFTGEVSLTGQPFVMEPKKTVGEIILEK GATVS AFIRLEVGE G  
 wbr31 IKENEKMIYIKSALKGKTKEIAEK ISNGKMKKFFEKIALEEQFFIFDDTKKIKNI IERNIYIKKFIRFEVGEN  
 XAC142 FVAKKEKIELAKMSEAKPAEILEKIIISGKISKIVNEVTLYGQPYV LNTDQTV EQAVAAGAEVIGFQRLAVGEG  
 XCC137 FVAKKEKIELAKMSEAKPAEILEKIIISGKISKIVNEVTLYGQPYV LNTDQTV EQAVAAGAEVIGFQRLAVGEG  
 XF2579 FLEKEKIEI LSKMSEKPADILEKIIISGKINKIVKEVTLYGQPYV LNTDQTV EQVVAAGADVIGFQRM EVGEG  
 y3135 VVAREHQIQLDIAIEGKPREIAEK MVEGRMKKFTGEVSLTGQNFVMDPSKTVGD LLENNADVNFIRFEVGE G  
 YP0104 VVAREHQIQLDIAIEGKPREIAEK MVEGRMKKFTGEVSLTGQNFVMDPSKTVGD LLENNADVNFIRFEVGE G  
 Z0181 VVEKEYQVQLDIAMQKPKETAEK MVEGRMKKFTGEVSLTGQPFVMEPSKTVGQ LLEHNAEVTGFI RFEVGE G

The alignment was obtained by concatenating the independently obtained alignments of 61 from 19 selected genomes after extraction of their clearly conserved portion.

Reference:

1. Margulis, L. & Fester, R., eds. (1991) *Symbiosis as a Source of Evolutionary Innovation* (MIT Press, Cambridge, MA).
