# Supplementary material
Source: PubMed Central journal article supplement (PMC170928)
Supplement: pnas_1533499100_2.pdf [file pnas_1533499100_2.pdf]

**Table 3. Annotated genome of *Blochmannia floridanus* (Bfl) (GenBank/EMBL/DDBJ accession no. BX248583)**

| Bfl gene number | Gene name* | Start | End   | Product                                                        | EC1          | EC2 | EC3 | Cluster of orthologous genes (COG) no. | COG category |
|-----------------|------------|-------|-------|----------------------------------------------------------------|--------------|-----|-----|----------------------------------------|--------------|
| Bfl001          | gidA       | 1     | 1905  | glucose inhibited division protein                             |              |     |     | COG0445                                | D            |
| Bfl002          | atpB       | 2294  | 3112  | ATP synthase subunit A                                         | EC:3.6.3.14  |     |     | COG0356                                | C            |
| Bfl003          | atpE       | 3181  | 3420  | ATP synthase subunit C                                         | EC:3.6.3.14  |     |     | COG0636                                | C            |
| Bfl004          | atpF       | 3490  | 3975  | ATP synthase subunit B                                         | EC:3.6.3.14  |     |     | COG0711                                | C            |
| Bfl005          | atpH       | 3976  | 4521  | ATP synthase delta subunit                                     | EC:3.6.3.14  |     |     | COG0712                                | C            |
| Bfl006          | atpA       | 4543  | 6084  | ATP synthase alpha subunit                                     | EC:3.6.3.14  |     |     | COG0056                                | C            |
| Bfl007          | atpG       | 6110  | 6976  | ATP synthase gamma subunit                                     | EC:3.6.3.14  |     |     | COG0224                                | C            |
| Bfl008          | atpD       | 7006  | 8400  | ATP synthase beta subunit                                      | EC:3.6.3.14  |     |     | COG0055                                | C            |
| Bfl009          | atpC       | 8460  | 8876  | ATP synthase epsilon subunit                                   | EC:3.6.3.14  |     |     | COG0355                                | C            |
| Bfl010          | glmU       | 9010  | 10407 | UDP-N-acetylglucosamine pyrophosphorylase                      | EC:2.7.7.23  |     |     | COG1207                                | M            |
| Bfl011          | thdF       | 11961 | 10537 | GTPase for tRNA modification and thiophene and furan oxidation |              |     |     | COG0486                                | R            |
| Bfl012          | yidC       | 13740 | 12064 | putative Preprotein translocase subunit YidC                   |              |     |     | COG0706                                | R            |
| Bfl013          | yidD       | 14000 | 13776 | Uncharacterized conserved protein                              |              |     |     | COG0759                                | S            |
| Bfl014          | rnpA       | 14326 | 13964 | RNase P, protein component                                     | EC:3.1.26.5  |     |     | COG0594                                | L            |
| Bfl015          | rpmH       | 14514 | 14374 | 50s ribosomal protein l34                                      |              |     |     | COG0230                                | J            |
| Bfl016          | dnaN       | 14731 | 15834 | DNA polymerase III beta-subunit                                | EC:2.7.7.7   |     |     | COG0592                                | L            |
| Bfl017          | gyrB       | 16096 | 18516 | DNA gyrase subunit B                                           | EC:5.99.1.3  |     |     | COG0187                                | L            |
| Bfl018          | ibpA       | 18765 | 19175 | heat shock protein A                                           |              |     |     | COG0071                                | O            |
| Bfl019          | Bfl019     | 20356 | 19346 | probable transmembrane protein                                 |              |     |     | COG0628                                | P            |
| Bfl020          | glyQ       | 20794 | 21699 | glycine-tRNA synthetase, alpha subunit                         | EC:6.1.1.14  |     |     | COG0752                                | J            |
| Bfl021          | glyS       | 21725 | 23710 | glycine-tRNA synthetase, beta subunit                          | EC:6.1.1.14  |     |     | COG0751                                | J            |
| Bfl022          | sodA       | 24389 | 23766 | manganese superoxide dismutase                                 | EC:1.15.1.1  |     |     | COG0605                                | P            |
| Bfl023          | prlC       | 24707 | 26794 | oligopeptidase A                                               | EC:3.4.24.70 |     |     | COG0339                                | E            |
| Bfl024          | pitA       | 28562 | 26943 | putative low-affinity inorganic phosphate transporter          |              |     |     | COG0306                                | P            |
| Bfl025          | ubiA       | 28887 | 29741 | 4-hydroxybenzoate octaprenyl transferase                       | EC:2.5.1.-   |     |     | COG0382                                | H            |

| <b>Bfl gene number</b> | <b>Gene name*</b> | <b>Start</b> | <b>End</b> | <b>Product</b>                                                          | <b>EC1</b>  | <b>EC2</b> | <b>EC3</b> | <b>Cluster of orthologous genes (COG) no.</b> | <b>COG category</b> |
|------------------------|-------------------|--------------|------------|-------------------------------------------------------------------------|-------------|------------|------------|-----------------------------------------------|---------------------|
| Bfl026                 | zur               | 30382        | 29903      | zinc uptake regulation protein                                          |             |            |            | COG0735                                       | P                   |
| Bfl027                 | dnaB              | 30665        | 32065      | replicative DNA helicase                                                | EC:3.6.1.-  |            |            | COG0305                                       | L                   |
| Bfl028                 | ssb               | 32202        | 32678      | single-strand DNA-binding protein                                       |             |            |            | COG0629                                       | L                   |
| Bfl029                 | yjcE              | 33060        | 34706      | putative sodium/hydrogen exchanger family protein                       |             |            |            | COG0025                                       | P                   |
| Bfl030                 | gltP              | 35103        | 36392      | proton glutamate symport protein                                        |             |            |            | COG1301                                       | C                   |
| Bfl031                 | yjgF              | 36994        | 36578      | putative translation initiation inhibitor                               |             |            |            | COG0251                                       | S                   |
| Bfl032                 | argI              | 38105        | 37062      | ornithine carbamoyltransferase                                          | EC:2.1.3.3  |            |            | COG0078                                       | E                   |
| Bfl033                 | valS              | 41260        | 38360      | valyl-tRNA synthetase                                                   | EC:6.1.1.9  |            |            | COG0525                                       | J                   |
| Bfl034                 | holC              | 41718        | 41257      | DNA polymerase III, chi subunit                                         | EC:2.7.7.7  |            |            | COG2927                                       | L                   |
| Bfl035                 | pepA              | 43352        | 41838      | cytosol aminopeptidase                                                  | EC:3.4.11.1 |            |            | COG0260                                       | E                   |
| Bfl036                 | yjgP              | 43484        | 44596      | putative inner membrane protein                                         |             |            |            | COG0795                                       | R                   |
| Bfl037                 | yjgQ              | 44598        | 45680      | putative inner membrane protein                                         |             |            |            | COG0795                                       | R                   |
| Bfl038                 | yidZ              | 46615        | 45692      | putative LysR-family transcriptional regulator                          |             |            |            | COG0583                                       | K                   |
| Bfl039                 | tRNA-Leu5         | 46904        | 46985      | tRNA-Leu anticodon CAA                                                  |             |            |            |                                               |                     |
| Bfl040                 | Bfl040            | 47224        | 47880      | putative manganese transport system ATP-binding protein                 |             |            |            | COG1121                                       | P                   |
| Bfl041                 | Bfl041            | 47930        | 48793      | putative manganese transport system permease protein                    |             |            |            | COG1108                                       | S                   |
| Bfl042                 | yhbG              | 49828        | 49103      | probable ABC transport protein, ATP-binding component                   |             |            |            | COG1137                                       | R                   |
| Bfl043                 | yhbN              | 50347        | 49841      | conserved hypothetical protein                                          |             |            |            | COG1934                                       | S                   |
| Bfl044                 | yrbK              | 50936        | 50328      | possible exported protein                                               |             |            |            | COG3117                                       | S                   |
| Bfl045                 | yrbA              | 51122        | 51376      | conserved hypothetical protein                                          |             |            |            | COG0271                                       | T                   |
| Bfl046                 | murA              | 51431        | 52693      | UDP-N-acetylglucosamine 1-carboxyvinyltransferase                       | EC:2.5.1.7  |            |            | COG0766                                       | M                   |
| Bfl047                 | degQ              | 54183        | 52798      | serine protease                                                         | EC:3.4.21.- |            |            | COG0265                                       | O                   |
| Bfl048                 | yhcB              | 54803        | 54393      | conserved hypothetical protein                                          |             |            |            | COG3105                                       | J                   |
| Bfl049                 | rplM              | 55306        | 55725      | 50S ribosomal subunit protein L13                                       |             |            |            | COG0102                                       | J                   |
| Bfl050                 | rpsI              | 55796        | 56188      | 30S ribosomal subunit protein S9                                        |             |            |            | COG0103                                       | J                   |
| Bfl051                 | yraP              | 56943        | 56365      | possible lipoprotein                                                    |             |            |            | COG2823                                       | S                   |
| Bfl052                 | yraL              | 57241        | 58146      | conserved hypothetical protein                                          |             |            |            | COG0313                                       | R                   |
| Bfl053                 | mpB               | 58173        | 58584      | regulatory RNA; RNase P RNA component, M1 RNA, processes tRNA, 4.5S RNA |             |            |            |                                               |                     |

| <b>Bfl gene number</b> | <b>Gene name*</b> | <b>Start</b> | <b>End</b> | <b>Product</b>                                                                          | <b>EC1</b>   | <b>EC2</b> | <b>EC3</b> | <b>Cluster of orthologous genes (COG) no.</b> | <b>COG category</b> |
|------------------------|-------------------|--------------|------------|-----------------------------------------------------------------------------------------|--------------|------------|------------|-----------------------------------------------|---------------------|
| Bfl054                 | yqjA              | 58900        | 59466      | putative membrane protein                                                               |              |            |            | COG0586                                       | R                   |
| Bfl055                 | tRNA-Met3         | 59570        | 59497      | tRNA-Met anticodon CAT                                                                  |              |            |            |                                               |                     |
| Bfl056                 | rpoD              | 61550        | 59697      | RNA polymerase sigma-70 factor                                                          |              |            |            | COG0568                                       | K                   |
| Bfl057                 | dnaG              | 63476        | 61710      | DNA primase                                                                             | EC:2.7.7.-   |            |            | COG0358                                       | L                   |
| Bfl058                 | rpsU              | 63837        | 63622      | 30S ribosomal subunit protein S21                                                       |              |            |            | COG0828                                       | J                   |
| Bfl059                 | gcp               | 64010        | 65071      | possible glycoprotease                                                                  | EC:3.4.24.57 |            |            | COG0533                                       | O                   |
| Bfl060                 | ygiH              | 65733        | 65143      | putative membrane protein                                                               |              |            |            | COG0344                                       | S                   |
| Bfl061                 | folB              | 65861        | 66229      | dihydroneopterin aldolase, also has dihydroneopterin triphosphate 2'-epimerase activity | EC:4.1.2.25  |            |            | COG1539                                       | H                   |
| Bfl062                 | cca               | 68011        | 66776      | tRNA nucleotidyltransferase                                                             | EC:2.7.7.25  |            |            | COG0617                                       | J                   |
| Bfl063                 | rfaE              | 68185        | 69624      | ADP-heptose synthase                                                                    | EC:2.7.-.-   |            |            | COG2870                                       | G                   |
| Bfl064                 | yqjC              | 70039        | 69770      | conserved hypothetical protein                                                          |              |            |            | COG2960                                       | S                   |
| Bfl065                 | ribB              | 70261        | 70902      | 3,4-dihydroxy-2-butanone 4-phosphate synthase                                           |              |            |            | COG0108                                       | H                   |
| Bfl066                 | plsC              | 71182        | 71916      | 1-acyl-glycerol-3-phosphate acyltransferase                                             | EC:2.3.1.51  |            |            | COG0204                                       | I                   |
| Bfl067                 | metC              | 73197        | 72022      | beta-cystathionase                                                                      | EC:4.4.1.8   |            |            | COG0626                                       | E                   |
| Bfl068                 | tRNA-Phe          | 73366        | 73294      | tRNA-Phe anticodon GAA                                                                  |              |            |            |                                               |                     |
| Bfl069                 | cutA              | 74061        | 73702      | periplasmic divalent cation tolerance protein CutA                                      |              |            |            | COG1324                                       | P                   |
| Bfl070                 | mopB              | 74437        | 74730      | GroES protein                                                                           |              |            |            | COG0234                                       | O                   |
| Bfl071                 | mopA              | 74787        | 76430      | GroEL protein                                                                           |              |            |            | COG0459                                       | O                   |
| Bfl072                 | efp               | 76578        | 77141      | elongation factor P (EF-P)                                                              |              |            |            | COG0231                                       | J                   |
| Bfl073                 | yjeP              | 80439        | 77182      | putative membrane protein                                                               |              |            |            | COG3264                                       | S                   |
| Bfl074                 | psd               | 81411        | 80515      | phosphatidylserine decarboxylase proenzyme                                              | EC:4.1.1.65  |            |            | COG0688                                       | I                   |
| Bfl075                 | orn               | 81932        | 82474      | oligoribonuclease                                                                       | EC:3.1.-.-   |            |            | COG1949                                       | F                   |
| Bfl076                 | tRNA-Gly2         | 82596        | 82669      | tRNA-Gly anticodon GCC                                                                  |              |            |            |                                               |                     |
| Bfl077                 | yjeE              | 82974        | 83477      | putative nucleotide-binding protein                                                     |              |            |            | COG0802                                       | R                   |
| Bfl078                 | amiB              | 83491        | 84750      | N-acetylmuramoyl-L-alanine amidase                                                      | EC:3.5.1.28  |            |            | COG0860                                       | M                   |
| Bfl079                 | miaA              | 84768        | 85739      | tRNA delta-2-isopentenylpyrophosphate (IPP) transferase                                 | EC:2.5.1.8   |            |            | COG0324                                       | J                   |
| Bfl080                 | hflX              | 86066        | 87184      | HflX protein, putative GTP-binding protein                                              |              |            |            | COG2262                                       | R                   |
| Bfl081                 | hflK              | 87413        | 88735      | HflK protein                                                                            |              |            |            | COG0330                                       | O                   |

| <b>Bfl gene number</b> | <b>Gene name*</b> | <b>Start</b> | <b>End</b> | <b>Product</b>                                                        | <b>EC1</b>  | <b>EC2</b> | <b>EC3</b> | <b>Cluster of orthologous genes (COG) no.</b> | <b>COG category</b> |
|------------------------|-------------------|--------------|------------|-----------------------------------------------------------------------|-------------|------------|------------|-----------------------------------------------|---------------------|
| Bfl082                 | hflC              | 88740        | 89765      | HflC protein                                                          | EC:3.4.-.-  |            |            | COG0330                                       | O                   |
| Bfl083                 | purA              | 89881        | 91197      | adenylosuccinate synthetase                                           | EC:6.3.4.4  |            |            | COG0104                                       | F                   |
| Bfl084                 | yjfH              | 91405        | 92169      | probable tRNA/rRNA methyltransferase                                  | EC:2.1.1.-  |            |            | COG0566                                       | J                   |
| Bfl085                 | rpsF              | 92399        | 92761      | 30S ribosomal subunit protein S6                                      |             |            |            | COG0360                                       | J                   |
| Bfl086                 | rpsR              | 92839        | 93075      | 30S ribosomal subunit protein S18                                     |             |            |            | COG0238                                       | J                   |
| Bfl087                 | rplI              | 93152        | 93637      | 50S ribosomal subunit protein L9                                      |             |            |            | COG0359                                       | J                   |
| Bfl088                 | cysQ              | 93801        | 94589      | cysQ protein                                                          |             |            |            | COG1218                                       | P                   |
| Bfl089                 | ytfM              | 94765        | 96539      | pseudogene of putative exported protein                               |             |            |            | COG0729                                       | M                   |
| Bfl090                 | ytfN              | 96536        | 100396     | putative exported protein                                             |             |            |            | COG2911                                       | S                   |
| Bfl091                 | ppa               | 101022       | 100483     | inorganic pyrophosphatase                                             | EC:3.6.1.1  |            |            | COG0221                                       | C                   |
| Bfl092                 | ispB              | 102159       | 101185     | octaprenyl-diphosphate synthase                                       | EC:2.5.1.-  |            |            | COG0142                                       | H                   |
| Bfl093                 | rplU              | 102286       | 102669     | 50S ribosomal subunit protein L21                                     |             |            |            | COG0261                                       | J                   |
| Bfl094                 | rpmA              | 102659       | 102916     | 50S ribosomal subunit protein L27                                     |             |            |            | COG0211                                       | J                   |
| Bfl095                 | yhbZ              | 103318       | 104235     | probable GTP-binding protein                                          |             |            |            | COG0536                                       | R                   |
| Bfl096                 | greA              | 104321       | 104809     | transcription elongation factor, cleaves 3' nucleotide of paused mRNA |             |            |            | COG0782                                       | K                   |
| Bfl097                 | ftsJ              | 105196       | 105816     | cell division protein 23S rRNA methyltransferase FtsJ                 | EC:2.1.1.-  |            |            | COG0293                                       | D                   |
| Bfl098                 | ftsH              | 105868       | 107802     | cell division protein FtsH                                            | EC:3.4.24.- |            |            | COG0465                                       | O                   |
| Bfl099                 | folP              | 107925       | 108770     | dihydropteroate synthase                                              | EC:2.5.1.15 |            |            | COG0294                                       | H                   |
| Bfl100                 | mrsA              | 108772       | 110130     | PGM/PMM-family protein                                                | EC:5.4.2.2  |            |            | COG1109                                       | G                   |
| Bfl101                 | tRNA-Leu4         | 110685       | 110768     | tRNA-Leu anticodon GAG                                                |             |            |            |                                               |                     |
| Bfl102                 | tRNA-Met2         | 110836       | 110909     | tRNA-Met anticodon CAT                                                |             |            |            |                                               |                     |
| Bfl103                 | nusA              | 111377       | 112882     | transcription pausing; L factor                                       |             |            |            | COG0195                                       | K                   |
| Bfl104                 | infB              | 112933       | 115626     | protein chain initiation factor 2                                     |             |            |            | COG0532                                       | J                   |
| Bfl105                 | rbfA              | 115697       | 116050     | ribosome-binding factor A (P15B protein)                              |             |            |            | COG0858                                       | J                   |
| Bfl106                 | truB              | 116087       | 116854     | tRNA pseudouridine 5S synthase                                        | EC:4.2.1.70 |            |            | COG0130                                       | J                   |
| Bfl107                 | rpsO              | 116984       | 117256     | 30S ribosomal subunit protein S15                                     |             |            |            | COG0184                                       | J                   |
| Bfl108                 | pnp               | 117421       | 119514     | polynucleotide phosphorylase, member of mRNA degradosome              | EC:2.7.7.8  |            |            | COG1185                                       | J                   |

| Bfl gene number | Gene name* | Start  | End    | Product                                                               | EC1          | EC2        | EC3 | Cluster of orthologous genes (COG) no. | COG category |
|-----------------|------------|--------|--------|-----------------------------------------------------------------------|--------------|------------|-----|----------------------------------------|--------------|
| Bfl109          | deaD       | 119755 | 121218 | Cold-shock DEAD-box protein A, inducible ATP-independent RNA helicase |              |            |     | COG0513                                | L            |
| Bfl110          | holD       | 121590 | 121997 | DNA polymerase III, psi subunit                                       | EC:2.7.7.7   |            |     | COG3050                                | L            |
| Bfl111          | thrA       | 122444 | 124900 | aspartokinase I/homoserine dehydrogenase I                            | EC:2.7.2.4   | EC:1.1.1.3 |     | COG0527                                | E            |
| Bfl112          | thrB       | 124937 | 125872 | homoserine kinase                                                     | EC:2.7.1.39  |            |     | COG0083                                | E            |
| Bfl113          | thrC       | 125876 | 127207 | threonine synthase                                                    | EC:4.2.99.2  |            |     | COG0498                                | E            |
| Bfl114          | dnaK       | 127463 | 129394 | DnaK protein (heat shock protein 70)                                  |              |            |     | COG0443                                | O            |
| Bfl115          | dnaJ       | 129526 | 130659 | DnaJ protein                                                          |              |            |     | COG0484                                | O            |
| Bfl116          | rpsT       | 131019 | 130753 | 30S ribosomal protein S20                                             |              |            |     | COG0268                                | J            |
| Bfl117          | ribF       | 131171 | 132106 | riboflavin biosynthesis protein RibF                                  | EC:2.7.1.26  | EC:2.7.7.2 |     | COG0196                                | H            |
| Bfl118          | ileS       | 132130 | 134991 | isoleucyl-tRNA synthetase                                             | EC:6.1.1.5   |            |     | COG0060                                | J            |
| Bfl119          | lspA       | 135013 | 135474 | lipoprotein signal peptidase                                          | EC:3.4.23.36 |            |     | COG0597                                | N            |
| Bfl120          | lytB       | 135590 | 136492 | pseudogene of LytB protein                                            |              |            |     | COG0761                                | M            |
| Bfl121          | dapB       | 136567 | 137391 | dihydrodipicolinate reductase                                         | EC:1.3.1.26  |            |     | COG0289                                | E            |
| Bfl122          | carA       | 137577 | 138725 | carbamoyl-phosphate synthase small chain                              | EC:6.3.5.5   |            |     | COG0505                                | E            |
| Bfl123          | carB       | 138746 | 142012 | carbamoyl-phosphate synthase large chain                              | EC:6.3.5.5   |            |     | COG0458                                | E            |
| Bfl124          | folA       | 142060 | 142566 | dihydrofolate reductase type I                                        | EC:1.5.1.3   |            |     | COG0262                                | H            |
| Bfl125          | apaH       | 143440 | 142622 | bis(5'-nucleosyl)-tetrphosphatase                                     | EC:3.6.1.41  |            |     | COG0639                                | T            |
| Bfl126          | ksgA       | 144369 | 143554 | dimethyladenosine transferase                                         | EC:2.1.1.-   |            |     | COG0030                                | J            |
| Bfl127          | pdxA       | 145378 | 144350 | pyridoxal phosphate biosynthetic protein PdxA                         |              |            |     | COG1995                                | H            |
| Bfl128          | surA       | 146651 | 145371 | survival protein SurA precursor                                       | EC:5.2.1.8   |            |     | COG0760                                | O            |
| Bfl129          | imp        | 149157 | 146701 | organic solvent tolerance protein precursor                           |              |            |     | COG1452                                | M            |
| Bfl130          | leuD       | 149950 | 149336 | 3-isopropylmalate dehydratase subunit 1                               | EC:4.2.1.33  |            |     | COG0066                                | E            |
| Bfl131          | leuC       | 151384 | 149984 | 3-isopropylmalate dehydratase subunit 2                               | EC:4.2.1.33  |            |     | COG0065                                | E            |
| Bfl132          | leuB       | 152490 | 151396 | 3-isopropylmalate dehydrogenase                                       | EC:1.1.1.85  |            |     | COG0473                                | E            |
| Bfl133          | leuA       | 154073 | 152514 | 2-isopropylmalate synthase                                            | EC:4.1.3.12  |            |     | COG0119                                | E            |
| Bfl134          | yabC       | 154460 | 155425 | putative S-adenosyl methionine adenytransferase                       | EC:2.1.1.-   |            |     | COG0275                                | M            |
| Bfl135          | ftsL       | 155428 | 155739 | cell division protein FtsL                                            |              |            |     | COG3116                                | M            |
| Bfl136          | ftsI       | 155840 | 157525 | penicillin-binding protein 3 precursor                                |              |            |     | COG0768                                | M            |

| Bfl gene number | Gene name* | Start  | End    | Product                                                                                                             | EC1         | EC2        | EC3 | Cluster of orthologous genes (COG) no. | COG category |
|-----------------|------------|--------|--------|---------------------------------------------------------------------------------------------------------------------|-------------|------------|-----|----------------------------------------|--------------|
| Bfl137          | murE       | 157557 | 159056 | UDP-N-acetylmuramoylalanyl-D-glutamate--2,6-diaminopimelate ligase                                                  | EC:6.3.2.13 |            |     | COG0769                                | M            |
| Bfl138          | murF       | 159076 | 160464 | UDP-N-acetylmuramoylalanyl-D-glutamyl-2,6-diaminopimelate--D-alanyl-D-alanyl ligase                                 | EC:6.3.2.15 |            |     | COG0770                                | M            |
| Bfl139          | mraY       | 160449 | 161546 | phospho-N-acetylmuramoyl-pentapeptide transferase                                                                   | EC:2.7.8.13 |            |     | COG0472                                | M            |
| Bfl140          | murD       | 161558 | 162892 | UDP-N-acetylmuramoyl-L-alanine:D-glutamate ligase                                                                   | EC:6.3.2.9  |            |     | COG0771                                | M            |
| Bfl141          | ftsW       | 162965 | 164071 | cell division protein FtsW                                                                                          |             |            |     | COG0772                                | D            |
| Bfl142          | murG       | 164094 | 165176 | UDP-N-acetylglucosamine:N-acetylmuramyl- (pentapeptide) pyrophosphoryl-undecaprenol N-acetylglucosamine transferase | EC:2.4.1.-  |            |     | COG0707                                | M            |
| Bfl143          | murC       | 165206 | 166648 | UDP-N-acetylmuramate:alanine ligase                                                                                 | EC:6.3.2.8  |            |     | COG0773                                | M            |
| Bfl144          | ftsQ       | 166732 | 167562 | cell division protein FtsQ                                                                                          |             |            |     | COG1589                                | M            |
| Bfl145          | ftsA       | 167555 | 168817 | cell division protein FtsA                                                                                          |             |            |     | COG0849                                | D            |
| Bfl146          | ftsZ       | 168893 | 170068 | cell division protein FtsZ                                                                                          |             |            |     | COG0206                                | D            |
| Bfl147          | lpxC       | 170136 | 171032 | UDP-3-O-[3-hydroxymyristoyl] N-acetylglucosamine deacetylase                                                        | EC:3.5.1.-  |            |     | COG0774                                | M            |
| Bfl148          | secA       | 171410 | 173932 | preprotein translocase SecA subunit                                                                                 |             |            |     | COG0653                                | N            |
| Bfl149          | dksA       | 174973 | 175434 | dosage-dependent dnaK suppressor protein                                                                            |             |            |     | COG1734                                | T            |
| Bfl150          | folK       | 175495 | 175989 | 7,8-dihydro-6-hydroxymethylpterin-pyrophosphokinase                                                                 | EC:2.7.6.3  |            |     | COG0801                                | H            |
| Bfl151          | lpdA       | 178012 | 176600 | dihydrolipoamide dehydrogenase                                                                                      | EC:1.8.1.4  |            |     | COG1249                                | C            |
| Bfl152          | aceF       | 179418 | 178141 | dihydrolipoamide acetyltransferase component (E2) of pyruvate dehydrogenase                                         | EC:2.3.1.12 |            |     | COG0508                                | C            |
| Bfl153          | aceE       | 182111 | 179433 | pyruvate dehydrogenase E1 component                                                                                 | EC:1.2.4.1  |            |     | COG2609                                | C            |
| Bfl154          | mrcB       | 182581 | 184923 | penicillin-binding protein 1b; peptidoglycan synthetase                                                             | EC:2.4.2.-  | EC:3.4.-.- |     | COG0744                                | M            |
| Bfl155          | yadR       | 185120 | 185479 | conserved hypothetical protein                                                                                      |             |            |     | COG0316                                | S            |
| Bfl156          | pyrG       | 185911 | 187563 | CTP synthetase                                                                                                      | EC:6.3.4.2  |            |     | COG0504                                | F            |
| Bfl157          | eno        | 187652 | 188995 | enolase                                                                                                             | EC:4.2.1.11 |            |     | COG0148                                | G            |
| Bfl158          | cysJ       | 189377 | 191209 | sulfite reductase (NADPH) flavoprotein beta subunit                                                                 | EC:1.8.1.2  |            |     | COG0369                                | P            |
| Bfl159          | cysI       | 191209 | 192918 | sulfite reductase (NADPH) hemoprotein alpha subunit                                                                 | EC:1.8.1.2  |            |     | COG0155                                | P            |

| Bfl gene number | Gene name* | Start  | End    | Product                                                                                         | EC1          | EC2         | EC3         | Cluster of orthologous genes (COG) no. | COG category |
|-----------------|------------|--------|--------|-------------------------------------------------------------------------------------------------|--------------|-------------|-------------|----------------------------------------|--------------|
| Bfl160          | cysH       | 192957 | 193697 | 3'-phosphoadenosine 5'-phosphosulfate sulfotransferase                                          | EC:1.8.99.4  |             |             | COG0175                                | E            |
| Bfl161          | cysG       | 193837 | 195222 | siroheme synthase                                                                               | EC:2.1.1.107 | EC:1.-.-.-  | EC:4.99.1.- | COG0007                                | H            |
| Bfl162          | cysD       | 195282 | 196199 | ATP sulfurylase (ATP:sulfate adenyltransferase) subunit 2                                       | EC:2.7.7.4   |             |             | COG0175                                | E            |
| Bfl163          | cysN       | 196218 | 197660 | ATP sulfurylase (ATP:sulfate adenyltransferase) subunit 1                                       | EC:2.7.7.4   |             |             | COG2895                                | J            |
| Bfl164          | cysC       | 197664 | 198296 | adenosine 5-phosphosulfate kinase                                                               | EC:2.7.1.25  |             |             | COG0529                                | P            |
| Bfl165          | ygbQ       | 198470 | 198775 | conserved hypothetical protein                                                                  |              |             |             | COG2919                                | R            |
| Bfl166          | ygbP       | 199342 | 199461 | pseudogene of 2-C-methyl-D-erythritol 4-phosphate cytidylyltransferase                          | EC:2.7.7.60  |             |             | COG1211                                | I            |
| Bfl167          | nlpD       | 200374 | 201321 | lipoprotein NlpD precursor                                                                      |              |             |             | COG0739                                | M            |
| Bfl168          | alaS       | 201467 | 204142 | alanyl-tRNA synthetase                                                                          | EC:6.1.1.7   |             |             | COG0013                                | J            |
| Bfl169          | csrA       | 204306 | 204503 | carbon storage regulator                                                                        |              |             |             | COG1551                                | T            |
| Bfl170          | tRNA-Ser4  | 204652 | 204742 | tRNA-Ser anticodon GCT                                                                          |              |             |             |                                        |              |
| Bfl171          | tRNA-Arg4  | 204800 | 204873 | tRNA-Arg anticodon ACG                                                                          |              |             |             |                                        |              |
| Bfl172          | ffh        | 205013 | 206386 | 4.5S-RNP protein, GTP binding export factor, part of signal recognition particle with 4.5 RNA   |              |             |             | COG0541                                | N            |
| Bfl173          | rpsP       | 206462 | 206710 | 30S ribosomal subunit protein S16                                                               |              |             |             | COG0228                                | J            |
| Bfl174          | rimM       | 206757 | 207314 | 16S rRNA processing protein                                                                     |              |             |             | COG0806                                | J            |
| Bfl175          | trmD       | 207348 | 208094 | tRNA(guanine-N1)methyltransferase                                                               | EC:2.1.1.31  |             |             | COG0336                                | J            |
| Bfl176          | rplS       | 208123 | 208476 | 50S ribosomal subunit protein L19                                                               |              |             |             | COG0335                                | J            |
| Bfl177          | aroF       | 208858 | 209943 | phospho-2-dehydro-3-deoxyheptonate aldolase, tyr-sensitive                                      | EC:4.1.2.15  |             |             | COG0722                                | E            |
| Bfl178          | tyrA       | 209950 | 211083 | chorismate mutase/prephenate dehydrogenase                                                      | EC:1.3.1.12  | EC:5.4.99.5 |             | COG0287                                | E            |
| Bfl179          | pheA       | 212052 | 211156 | prephenate dehydratase                                                                          | EC:4.2.1.51  |             |             | COG1605                                | E            |
| Bfl180          | yfiO       | 212889 | 212149 | putative lipoprotein                                                                            |              |             |             | COG0457                                | R            |
| Bfl181          | rluD       | 213012 | 213977 | pseudouridine synthase (pseudouridines 1911, 1915, 1917 in 23S RNA)                             | EC:4.2.1.70  |             |             | COG0564                                | J            |
| Bfl182          | clpB       | 214168 | 216786 | ATP-dependent protease, Hsp 100, part of novel multi-chaperone system with DnaK, DnaJ, and GrpE |              |             |             | COG0542                                | O            |
| Bfl183          | murB       | 216984 | 218021 | UDP-N-acetylenolpyruvoylglucosamine reductase                                                   | EC:1.1.1.158 |             |             | COG0812                                | M            |
| Bfl184          | birA       | 218136 | 218960 | bifunctional protein: biotin operon repressor and biotin-                                       | EC:6.3.4.15  |             |             | COG0340                                | K            |

| <b>Bfl gene number</b> | <b>Gene name*</b> | <b>Start</b> | <b>End</b> | <b>Product</b>                      | <b>EC1</b> | <b>EC2</b> | <b>EC3</b> | <b>Cluster of orthologous genes (COG) no.</b> | <b>COG category</b> |
|------------------------|-------------------|--------------|------------|-------------------------------------|------------|------------|------------|-----------------------------------------------|---------------------|
|                        |                   |              |            | [acetyl-CoA carboxylase] synthetase |            |            |            |                                               |                     |
| Bfl185                 | tRNA-Thr3         | 219918       | 219989     | tRNA-Thr anticodon TGT              |            |            |            |                                               |                     |
| Bfl186                 | tRNA-Tyr          | 220004       | 220085     | tRNA-Tyr anticodon GTA              |            |            |            |                                               |                     |
| Bfl187                 | tRNA-Gly1         | 220138       | 220209     | tRNA-Gly anticodon TCC              |            |            |            |                                               |                     |
| Bfl188                 | tRNA-Thr2         | 220246       | 220317     | tRNA-Thr anticodon GGT              |            |            |            |                                               |                     |
| Bfl189                 | bfr               | 220512       | 220982     | bacterioferritin                    |            |            |            | COG2193                                       | P                   |
| Bfl190                 | rpsJ              | 221115       | 221426     | 30S ribosomal subunit protein S10   |            |            |            | COG0051                                       | J                   |
| Bfl191                 | rplC              | 221527       | 222186     | 50S ribosomal subunit protein L3    |            |            |            | COG0087                                       | J                   |
| Bfl192                 | rplD              | 222183       | 222821     | 50S ribosomal subunit protein L4    |            |            |            | COG0088                                       | J                   |
| Bfl193                 | rplW              | 222830       | 223129     | 50S ribosomal subunit protein L23   |            |            |            | COG0089                                       | J                   |
| Bfl194                 | rplB              | 223151       | 223981     | 50S ribosomal subunit protein L2    |            |            |            | COG0090                                       | J                   |
| Bfl195                 | rpsS              | 224008       | 224289     | 30S ribosomal subunit protein S19   |            |            |            | COG0185                                       | J                   |
| Bfl196                 | rplV              | 224342       | 224671     | 50S ribosomal subunit protein L22   |            |            |            | COG0091                                       | J                   |
| Bfl197                 | rpsC              | 224731       | 225438     | 30S ribosomal subunit protein S3    |            |            |            | COG0092                                       | J                   |
| Bfl198                 | rplP              | 225456       | 225857     | 50S ribosomal subunit protein L16   |            |            |            | COG0197                                       | J                   |
| Bfl199                 | rpmC              | 225862       | 226062     | 50S ribosomal subunit protein L29   |            |            |            | COG0255                                       | J                   |
| Bfl200                 | rpsQ              | 226109       | 226366     | 30S ribosomal subunit protein S17   |            |            |            | COG0186                                       | J                   |
| Bfl201                 | rplN              | 226450       | 226821     | 50S ribosomal subunit protein L14   |            |            |            | COG0093                                       | J                   |
| Bfl202                 | rplX              | 226853       | 227173     | 50S ribosomal subunit protein L24   |            |            |            | COG0198                                       | J                   |
| Bfl203                 | rplE              | 227197       | 227769     | 50S ribosomal subunit protein L5    |            |            |            | COG0094                                       | J                   |
| Bfl204                 | rpsN              | 227775       | 228080     | 30S ribosomal subunit protein S14   |            |            |            | COG0199                                       | J                   |
| Bfl205                 | rpsH              | 228132       | 228527     | 30S ribosomal subunit protein S8    |            |            |            | COG0096                                       | J                   |
| Bfl206                 | rplF              | 228550       | 229095     | 50S ribosomal subunit protein L6    |            |            |            | COG0097                                       | J                   |
| Bfl207                 | rplR              | 229150       | 229503     | 50S ribosomal subunit protein L18   |            |            |            | COG0256                                       | J                   |
| Bfl208                 | rpsE              | 229516       | 230049     | 30S ribosomal subunit protein S5    |            |            |            | COG0098                                       | J                   |
| Bfl209                 | rpmD              | 230055       | 230231     | 50S ribosomal subunit protein L30   |            |            |            | COG1841                                       | J                   |
| Bfl210                 | rplO              | 230238       | 230681     | 50S ribosomal subunit protein L15   |            |            |            | COG0200                                       | J                   |
| Bfl211                 | secY              | 230690       | 232045     | preprotein translocase subunit secY |            |            |            | COG0201                                       | N                   |
| Bfl212                 | rpmJ              | 232091       | 232207     | 50S ribosomal subunit protein L36   |            |            |            | COG0257                                       | J                   |

| <b>Bfl gene number</b> | <b>Gene name*</b> | <b>Start</b> | <b>End</b> | <b>Product</b>                                                                 | <b>EC1</b>  | <b>EC2</b>   | <b>EC3</b> | <b>Cluster of orthologous genes (COG) no.</b> | <b>COG category</b> |
|------------------------|-------------------|--------------|------------|--------------------------------------------------------------------------------|-------------|--------------|------------|-----------------------------------------------|---------------------|
| Bfl213                 | rpsM              | 232287       | 232643     | 30S ribosomal subunit protein S13                                              |             |              |            | COG0099                                       | J                   |
| Bfl214                 | rpsK              | 232707       | 233099     | 30S ribosomal subunit protein S11                                              |             |              |            | COG0100                                       | J                   |
| Bfl215                 | rpsD              | 233135       | 233758     | 30S ribosomal subunit protein S4                                               |             |              |            | COG0522                                       | J                   |
| Bfl216                 | rpoA              | 233794       | 234789     | DNA-directed RNA polymerase alpha chain                                        | EC:2.7.7.6  |              |            | COG0202                                       | K                   |
| Bfl217                 | rpIQ              | 234854       | 235231     | 50S ribosomal subunit protein L17                                              |             |              |            | COG0203                                       | J                   |
| Bfl218                 | fnt               | 236277       | 235306     | methionyl-tRNA formyltransferase                                               | EC:2.1.2.9  |              |            | COG0223                                       | J                   |
| Bfl219                 | def               | 236831       | 236304     | polypeptide deformylase                                                        | EC:3.5.1.31 |              |            | COG0242                                       | J                   |
| Bfl220                 | yrdC              | 237099       | 237668     | conserved hypothetical protein                                                 |             |              |            | COG0009                                       | J                   |
| Bfl221                 | aroE              | 237684       | 238568     | shikimate 5-dehydrogenase                                                      | EC:1.1.1.25 |              |            | COG0169                                       | E                   |
| Bfl222                 | 5SrRNA            | 238664       | 238785     | 5S rRNA                                                                        |             |              |            |                                               |                     |
| Bfl223                 | gloB              | 239591       | 238821     | probable hydroxyacylglutathione hydrolase                                      | EC:3.1.2.6  |              |            | COG0491                                       | R                   |
| Bfl224                 | rnhA              | 240144       | 239641     | ribonuclease H                                                                 | EC:3.1.26.4 |              |            | COG0328                                       | L                   |
| Bfl225                 | dnaQ              | 240201       | 240977     | DNA polymerase III epsilon subunit                                             | EC:2.7.7.7  |              |            | COG0847                                       | L                   |
| Bfl226                 | lpcA              | 241132       | 241713     | phosphoheptose isomerase                                                       | EC:5.-.-.   |              |            | COG0279                                       | G                   |
| Bfl227                 | tRNA-Thr1         | 241865       | 241937     | tRNA-Thr anticodon CGT                                                         |             |              |            |                                               |                     |
| Bfl228                 | ahpC              | 242632       | 242033     | alkyl hydroperoxide reductase C22 protein                                      | EC:1.6.4.-  |              |            | COG0450                                       | O                   |
| Bfl229                 | queA              | 242932       | 243993     | S-adenosylmethionine:tRNA ribosyltransferase-isomerase                         | EC:5.-.-.   |              |            | COG0809                                       | J                   |
| Bfl230                 | tgt               | 244122       | 245258     | queuine tRNA-ribosyltransferase; tRNA-guanine transglycosylase                 | EC:2.4.2.29 |              |            | COG0343                                       | J                   |
| Bfl231                 | yajC              | 245301       | 245648     | preprotein translocase YajC subunit                                            |             |              |            | COG1862                                       | S                   |
| Bfl232                 | secD              | 245653       | 247527     | protein-export membrane protein SecD                                           |             |              |            | COG0342                                       | N                   |
| Bfl233                 | secF              | 247568       | 248470     | protein-export membrane protein SecF                                           |             |              |            | COG0341                                       | N                   |
| Bfl234                 | ribD              | 248862       | 249998     | bifunctional pyrimidine deaminase/reductase in pathway of riboflavin synthesis | EC:3.5.4.26 | EC:1.1.1.193 |            | COG0117                                       | H                   |
| Bfl235                 | ribH              | 250136       | 250615     | 6,7-dimethyl-8-ribityllumazine synthase (riboflavin synthase beta chain)       | EC:2.5.1.9  |              |            | COG0054                                       | H                   |
| Bfl236                 | nusB              | 250640       | 251056     | transcription termination; L factor                                            |             |              |            | COG0781                                       | K                   |
| Bfl237                 | pgpA              | 251094       | 251570     | phosphatidylglycerophosphatase A                                               | EC:3.1.3.27 |              |            | COG1267                                       | I                   |
| Bfl238                 | dxs               | 253479       | 251626     | 1-deoxyxylulose-5-phosphate synthase                                           | EC:4.1.3.7  |              |            | COG1154                                       | H                   |

| <b>Bfl gene number</b> | <b>Gene name*</b> | <b>Start</b> | <b>End</b> | <b>Product</b>                                           | <b>EC1</b>   | <b>EC2</b> | <b>EC3</b> | <b>Cluster of orthologous genes (COG) no.</b> | <b>COG category</b> |
|------------------------|-------------------|--------------|------------|----------------------------------------------------------|--------------|------------|------------|-----------------------------------------------|---------------------|
| Bfl239                 | thiI              | 254257       | 255735     | thiamine biosynthesis protein ThiI                       |              |            |            | COG0301                                       | H                   |
| Bfl240                 | yajR              | 257057       | 255873     | putative MFS family transporter                          |              |            |            | COG0477                                       | G                   |
| Bfl241                 | cyoE              | 258063       | 257182     | protohaeme IX farnesyltransferase (haeme O biosynthesis) | EC:2.5.1.-   |            |            | COG0109                                       | H                   |
| Bfl242                 | cyoD              | 258396       | 258094     | cytochrome O ubiquinol oxidase subunit CyoD              |              |            |            | COG3125                                       | C                   |
| Bfl243                 | cyoC              | 258991       | 258401     | cytochrome o ubiquinol oxidase subunit III               | EC:1.10.3.-  |            |            | COG1845                                       | C                   |
| Bfl244                 | cyoB              | 260939       | 258975     | cytochrome o ubiquinol oxidase subunit I                 | EC:1.10.3.-  |            |            | COG0843                                       | C                   |
| Bfl245                 | cyoA              | 261893       | 261009     | cytochrome o ubiquinol oxidase subunit II                | EC:1.10.3.-  |            |            | COG1622                                       | C                   |
| Bfl246                 | clpP              | 262722       | 263351     | ATP-dependent Clp protease proteolytic subunit           | EC:3.4.21.92 |            |            | COG0740                                       | O                   |
| Bfl247                 | clpX              | 263539       | 264819     | ATP-dependent Clp protease ATP-binding subunit ClpX      |              |            |            | COG1219                                       | O                   |
| Bfl248                 | yggX              | 265176       | 264937     | conserved hypothetical protein                           |              |            |            | COG2924                                       | S                   |
| Bfl249                 | mutY              | 266297       | 265230     | A/G-specific adenine glycosylase                         | EC:3.2.2.-   |            |            | COG1194                                       | L                   |
| Bfl250                 | yqgF              | 267389       | 266961     | putative endonuclease involved in recombination          |              |            |            | COG0816                                       | R                   |
| Bfl251                 | yqgE              | 267967       | 267386     | putative transcriptional regulator                       |              |            |            | COG1678                                       | R                   |
| Bfl252                 | metK              | 269533       | 268376     | S-adenosylmethionine synthetase                          | EC:2.5.1.6   |            |            | COG0192                                       | H                   |
| Bfl253                 | speB              | 269924       | 270835     | agmatine ureohydrolase                                   | EC:3.5.3.11  |            |            | COG0010                                       | E                   |
| Bfl254                 | pgk               | 271177       | 272379     | phosphoglycerate kinase                                  | EC:2.7.2.3   |            |            | COG0126                                       | G                   |
| Bfl255                 | fba               | 272472       | 273548     | fructose 1,6-bisphosphate aldolase                       | EC:4.1.2.13  |            |            | COG0191                                       | G                   |
| Bfl256                 | rpiA              | 273801       | 274469     | ribose 5-phosphate isomerase                             | EC:5.3.1.6   |            |            | COG0120                                       | G                   |
| Bfl257                 | ygfA              | 275194       | 274607     | putative ligase                                          |              |            |            | COG0212                                       | H                   |
| Bfl258                 | ygfE              | 275633       | 275289     | conserved hypothetical protein                           |              |            |            | COG3027                                       | S                   |
| Bfl259                 | ubiH              | 276061       | 277245     | 2-octaprenyl-6-methoxyphenol hydroxylase                 | EC:1.14.13.- |            |            | COG0654                                       | H                   |
| Bfl260                 | ygfZ              | 278759       | 277749     | putative aminomethyltransferase                          |              |            |            | COG0354                                       | R                   |
| Bfl261                 | prfB              | 279048       | 280145     | peptide chain release factor 2 (RF-2)                    |              |            |            | COG1186                                       | J                   |
| Bfl262                 | lysS              | 280221       | 281678     | lysyl-tRNA synthetase                                    | EC:6.1.1.6   |            |            | COG1190                                       | J                   |
| Bfl263                 | lysA              | 281804       | 283081     | diaminopimelate decarboxylase                            | EC:4.1.1.20  |            |            | COG0019                                       | E                   |
| Bfl264                 | ygdP              | 283319       | 283795     | conserved hypothetical protein                           | EC:3.6.1.-   |            |            | COG0494                                       | L                   |
| Bfl265                 | lgt               | 283950       | 284804     | prolipoprotein diacylglyceryl transferase                | EC:2.4.99.-  |            |            | COG0682                                       | M                   |
| Bfl266                 | recC              | 285021       | 288440     | exonuclease V, subunit                                   | EC:3.1.11.5  |            |            | COG1330                                       | L                   |
| Bfl267                 | recD              | 290416       | 288494     | exonuclease V, alpha chain                               | EC:3.1.11.5  |            |            | COG0507                                       | L                   |

| <b>Bfl gene number</b> | <b>Gene name*</b> | <b>Start</b> | <b>End</b> | <b>Product</b>                                                         | <b>EC1</b>   | <b>EC2</b> | <b>EC3</b> | <b>Cluster of orthologous genes (COG) no.</b> | <b>COG category</b> |
|------------------------|-------------------|--------------|------------|------------------------------------------------------------------------|--------------|------------|------------|-----------------------------------------------|---------------------|
| Bfl268                 | recB              | 294249       | 290623     | exonuclease V, beta chain                                              | EC:3.1.11.5  |            |            | COG1074                                       | L                   |
| Bfl269                 | dapD              | 295209       | 294367     | 2,3,4,5-tetrahydropyridine-2-carboxylate N-succinyltransferase         | EC:2.3.1.117 |            |            | COG2171                                       | E                   |
| Bfl270                 | map               | 296016       | 295222     | methionine aminopeptidase                                              | EC:3.4.11.18 |            |            | COG0024                                       | J                   |
| Bfl271                 | rpsB              | 296283       | 296978     | 30S ribosomal protein S2                                               |              |            |            | COG0052                                       | J                   |
| Bfl272                 | tsf               | 297058       | 297867     | elongation factor Ts (EF-Ts)                                           |              |            |            | COG0264                                       | J                   |
| Bfl273                 | pyrH              | 298001       | 298732     | uridine 5'-monophosphate kinase                                        | EC:2.7.4.-   |            |            | COG0528                                       | F                   |
| Bfl274                 | frt               | 298800       | 299366     | ribosome recycling factor                                              |              |            |            | COG0233                                       | J                   |
| Bfl275                 | dxr               | 299486       | 300661     | 1-deoxy-D-xylulose 5-phosphate reductoisomerase                        | EC:1.1.1.-   |            |            | COG0743                                       | I                   |
| Bfl276                 | uppS              | 300736       | 301488     | undecaprenyl pyrophosphate synthetase                                  | EC:2.5.1.31  |            |            | COG0020                                       | I                   |
| Bfl277                 | cdsA              | 301540       | 302406     | phosphatidate cytidyltransferase                                       | EC:2.7.7.41  |            |            | COG0575                                       | I                   |
| Bfl278                 | yaeL              | 302432       | 303820     | putative membrane-associated Zn-dependent protease                     | EC:3.4.24.-  |            |            | COG0750                                       | M                   |
| Bfl279                 | yaeT              | 303837       | 306302     | outer membrane protein precursor                                       |              |            |            | COG0729                                       | M                   |
| Bfl280                 | hlpA              | 306394       | 306900     | histone-like protein, located in outer membrane                        |              |            |            | COG2825                                       | L                   |
| Bfl281                 | lpxD              | 306928       | 308037     | UDP-3-O-[3-hydroxymyristoyl] glucosamine N-acyltransferase             | EC:2.3.1.-   |            |            | COG1044                                       | M                   |
| Bfl282                 | fabZ              | 308041       | 308496     | (3R)-hydroxymyristol acyl carrier protein dehydrase                    | EC:4.2.1.-   |            |            | COG0764                                       | I                   |
| Bfl283                 | lpxA              | 308500       | 309288     | acyl-[acyl-carrier-protein]:UDP-N- acetylglucosamine O-acyltransferase | EC:2.3.1.129 |            |            | COG1043                                       | M                   |
| Bfl284                 | lpxB              | 309315       | 310469     | lipid-A-disaccharide synthase                                          | EC:2.4.1.182 |            |            | COG0763                                       | M                   |
| Bfl285                 | rnhB              | 310493       | 311110     | ribonuclease HII                                                       | EC:3.1.26.4  |            |            | COG0164                                       | L                   |
| Bfl286                 | dnaE              | 311183       | 314683     | DNA polymerase III, alpha chain                                        | EC:2.7.7.7   |            |            | COG0587                                       | L                   |
| Bfl287                 | accA              | 314706       | 315665     | acetyl-coenzyme A carboxylase carboxyl transferase subunit alpha       | EC:6.4.1.2   |            |            | COG0825                                       | I                   |
| Bfl288                 | mesJ              | 315871       | 317466     | cell cycle protein MesJ                                                |              |            |            | COG0037                                       | R                   |
| Bfl289                 | proS              | 319333       | 317588     | prolyl-tRNA synthetase                                                 | EC:6.1.1.15  |            |            | COG0442                                       | J                   |
| Bfl290                 | yaeD              | 319544       | 320070     | pseudogene of conserved hypothetical protein                           |              |            |            | COG0241                                       | E                   |
| Bfl291                 | accC              | 321577       | 320225     | acetyl CoA carboxylase, biotin carboxylase subunit                     | EC:6.3.4.14  |            |            | COG0439                                       | I                   |
| Bfl292                 | accB              | 322030       | 321596     | acetylCoA carboxylase, BCCP subunit, carrier of biotin                 |              |            |            | COG0511                                       | I                   |

| <b>Bfl gene number</b> | <b>Gene name*</b> | <b>Start</b> | <b>End</b> | <b>Product</b>                                                                                                        | <b>EC1</b>   | <b>EC2</b> | <b>EC3</b> | <b>Cluster of orthologous genes (COG) no.</b> | <b>COG category</b> |
|------------------------|-------------------|--------------|------------|-----------------------------------------------------------------------------------------------------------------------|--------------|------------|------------|-----------------------------------------------|---------------------|
| Bfl293                 | aroQ              | 322506       | 322066     | 3-dehydroquinate dehydratase II                                                                                       |              |            |            | COG0757                                       | E                   |
| Bfl294                 | mreB              | 322853       | 323896     | rod shape-determining protein MreB                                                                                    |              |            |            | COG1077                                       | D                   |
| Bfl295                 | mreC              | 323987       | 324805     | rod shape-determining protein MreC                                                                                    |              |            |            | COG1792                                       | M                   |
| Bfl296                 | mreD              | 324845       | 325333     | rod shape-determining protein MreD                                                                                    |              |            |            | COG2891                                       | M                   |
| Bfl297                 | tldD              | 325620       | 327092     | TldD protein                                                                                                          |              |            |            | COG0312                                       | R                   |
| Bfl298                 | pmbA              | 327138       | 328481     | putative PmbA protein                                                                                                 |              |            |            | COG0312                                       | R                   |
| Bfl299                 | lon               | 328887       | 331223     | Lon protease                                                                                                          | EC:3.4.21.53 |            |            | COG0466                                       | O                   |
| Bfl300                 | apt               | 331775       | 332326     | adenine phosphoribosyltransferase                                                                                     | EC:2.4.2.7   |            |            | COG0503                                       | F                   |
| Bfl301                 | dnaX              | 332391       | 334016     | DNA polymerase III subunit gamma                                                                                      | EC:2.7.7.7   |            |            | COG2812                                       | L                   |
| Bfl302                 | adk               | 334622       | 335302     | adenylate kinase                                                                                                      | EC:2.7.4.3   |            |            | COG0563                                       | F                   |
| Bfl303                 | ybbF              | 336046       | 335303     | UDP-2,3-diacetylglucosamine hydrolase                                                                                 | EC:3.6.1.-   |            |            | COG2908                                       | M                   |
| Bfl304                 | cysS              | 336243       | 337667     | cysteinyl-tRNA synthetase                                                                                             | EC:6.1.1.16  |            |            | COG0215                                       | J                   |
| Bfl305                 | fold              | 338554       | 337664     | FoID bifunctional protein [includes: methylenetetrahydrofolate dehydrogenase; methenyltetrahydrofolate cyclohydrolase | EC:1.5.1.5   | EC:3.5.4.9 |            | COG0190                                       | H                   |
| Bfl306                 | tRNA-Arg3         | 338731       | 338804     | tRNA-Arg anticodon TCT                                                                                                |              |            |            |                                               |                     |
| Bfl307                 | ytfF              | 338935       | 339897     | putative membrane protein                                                                                             |              |            |            | COG0697                                       | R                   |
| Bfl308                 | mrdB              | 341089       | 339974     | rod shape-determining membrane protein; cell elongation in e phase                                                    |              |            |            | COG0772                                       | D                   |
| Bfl309                 | mrdA              | 342966       | 341107     | penicillin-binding protein 2                                                                                          |              |            |            | COG0768                                       | M                   |
| Bfl310                 | ybeB              | 343366       | 343061     | conserved hypothetical protein                                                                                        |              |            |            | COG0799                                       | S                   |
| Bfl311                 | holA              | 344675       | 343641     | DNA polymerase III, delta subunit                                                                                     | EC:2.7.7.7   |            |            | COG1466                                       | L                   |
| Bfl312                 | rlpB              | 345364       | 344753     | rare lipoprotein B precursor                                                                                          |              |            |            | COG2980                                       | M                   |
| Bfl313                 | leuS              | 347912       | 345309     | leucyl-tRNA synthetase                                                                                                | EC:6.1.1.4   |            |            | COG0495                                       | J                   |
| Bfl314                 | Int               | 349649       | 348081     | apolipoprotein N-acyltransferase                                                                                      | EC:2.3.1.-   |            |            | COG0815                                       | M                   |
| Bfl315                 | ybeX              | 350561       | 349686     | haemolysin-related protein                                                                                            |              |            |            | COG1253                                       | R                   |
| Bfl316                 | ybeY              | 351064       | 350603     | conserved hypothetical protein                                                                                        |              |            |            | COG0319                                       | S                   |
| Bfl317                 | phoL              | 352168       | 351161     | PhoH-like ATP-binding protein                                                                                         |              |            |            | COG1702                                       | T                   |
| Bfl318                 | ubiF              | 352518       | 353711     | putative monooxygenase                                                                                                | EC:1.14.13.- |            |            | COG0654                                       | H                   |

| <b>Bfl gene number</b> | <b>Gene name*</b> | <b>Start</b> | <b>End</b> | <b>Product</b>                                              | <b>EC1</b>  | <b>EC2</b> | <b>EC3</b> | <b>Cluster of orthologous genes (COG) no.</b> | <b>COG category</b> |
|------------------------|-------------------|--------------|------------|-------------------------------------------------------------|-------------|------------|------------|-----------------------------------------------|---------------------|
| Bfl319                 | tRNA-Gln          | 353907       | 353836     | tRNA-Gln anticodon TTG                                      |             |            |            |                                               |                     |
| Bfl320                 | tRNA-Leu3         | 354041       | 353960     | tRNA-Leu anticodon TAG                                      |             |            |            |                                               |                     |
| Bfl321                 | tRNA-Met1         | 354170       | 354097     | tRNA-Met anticodon CAT                                      |             |            |            |                                               |                     |
| Bfl322                 | nagA              | 355509       | 354355     | N-acetylglucosamine-6-phosphate deacetylase                 | EC:3.5.1.25 |            |            | COG1820                                       | G                   |
| Bfl323                 | nagB              | 356327       | 355524     | glucosamine-6-phosphate isomerase                           | EC:3.5.99.6 |            |            | COG0363                                       | G                   |
| Bfl324                 | glnS              | 356593       | 358263     | glutaminyl-tRNA synthetase                                  | EC:6.1.1.18 |            |            | COG0008                                       | J                   |
| Bfl325                 | fldA              | 358897       | 358370     | flavodoxin 1                                                |             |            |            | COG0716                                       | C                   |
| Bfl326                 | pgm               | 359724       | 361370     | phosphoglucomutase                                          | EC:5.4.2.2  |            |            | COG0033                                       | G                   |
| Bfl327                 | sdhC              | 362199       | 362594     | succinate dehydrogenase cytochrome b-556 subunit            | EC:1.3.99.1 |            |            | COG2009                                       | C                   |
| Bfl328                 | sdhD              | 362582       | 362929     | succinate dehydrogenase hydrophobic membrane anchor protein | EC:1.3.99.1 |            |            | COG2142                                       | C                   |
| Bfl329                 | sdhA              | 362932       | 364740     | succinate dehydrogenase flavoprotein subunit                | EC:1.3.99.1 |            |            | COG1053                                       | C                   |
| Bfl330                 | sdhB              | 364754       | 365482     | succinate dehydrogenase iron-sulfur protein                 | EC:1.3.99.1 |            |            | COG0479                                       | C                   |
| Bfl331                 | sucA              | 365626       | 368538     | 2-oxoglutarate dehydrogenase E1 component                   | EC:1.2.4.2  |            |            | COG0567                                       | C                   |
| Bfl332                 | sucB              | 368546       | 369862     | dihydrolipoamide succinyltransferase component (E2)         | EC:2.3.1.61 |            |            | COG0508                                       | C                   |
| Bfl333                 | sucC              | 369959       | 371158     | succinyl-CoA synthetase beta chain                          | EC:6.2.1.5  |            |            | COG0045                                       | C                   |
| Bfl334                 | sucD              | 371161       | 372051     | succinyl-CoA synthetase alpha chain                         | EC:6.2.1.5  |            |            | COG0074                                       | C                   |
| Bfl335                 | tolQ              | 372131       | 372880     | TolQ protein                                                |             |            |            | COG0811                                       | N                   |
| Bfl336                 | tolR              | 372843       | 373271     | tolR protein                                                |             |            |            | COG0848                                       | N                   |
| Bfl337                 | tolA              | 373293       | 374597     | tolA protein                                                |             |            |            | COG3064                                       | N                   |
| Bfl338                 | tolB              | 374679       | 376061     | tolB protein precursor                                      |             |            |            | COG0823                                       | N                   |
| Bfl339                 | pal               | 376113       | 376637     | peptidoglycan-associated lipoprotein precursor              |             |            |            | COG2885                                       | N                   |
| Bfl340                 | ybgF              | 376643       | 377443     | putative exported protein                                   |             |            |            | COG1729                                       | S                   |
| Bfl341                 | ybhE              | 378604       | 377588     | conserved hypothetical protein                              |             |            |            | COG2706                                       | R                   |
| Bfl342                 | gpmA              | 378754       | 379452     | phosphoglycerate mutase 1                                   | EC:5.4.2.1  |            |            | COG0588                                       | G                   |
| Bfl343                 | ybhL              | 379588       | 380298     | putative permease                                           |             |            |            | COG0670                                       | R                   |
| Bfl344                 | ychF              | 381457       | 380411     | putative ATP/GTP-binding protein                            |             |            |            | COG0012                                       | R                   |
| Bfl345                 | pth               | 382176       | 381583     | peptidyl-tRNA hydrolase                                     | EC:3.1.1.29 |            |            | COG0193                                       | J                   |
| Bfl346                 | prsA              | 383272       | 382328     | ribose-phosphate pyrophosphokinase                          | EC:2.7.6.1  |            |            | COG0462                                       | F                   |

| <b>Bfl gene number</b> | <b>Gene name*</b> | <b>Start</b> | <b>End</b> | <b>Product</b>                                          | <b>EC1</b>   | <b>EC2</b> | <b>EC3</b> | <b>Cluster of orthologous genes (COG) no.</b> | <b>COG category</b> |
|------------------------|-------------------|--------------|------------|---------------------------------------------------------|--------------|------------|------------|-----------------------------------------------|---------------------|
| Bfl347                 | ipk               | 384036       | 383269     | isopentenyl monophosphate kinase                        | EC:2.7.1.148 |            |            | COG1947                                       | S                   |
| Bfl348                 | prfA              | 384855       | 385931     | peptide chain release factor 1 (RF-1)                   |              |            |            | COG0216                                       | J                   |
| Bfl349                 | hemK              | 385928       | 386773     | putative protoporphyrinogen oxidase                     | EC:2.1.1.-   |            |            | COG2890                                       | R                   |
| Bfl350                 | kdsA              | 386930       | 387766     | 2-dehydro-3-deoxyphosphooctonate aldolase               | EC:4.1.2.16  |            |            | COG2877                                       | E                   |
| Bfl351                 | thrS              | 388653       | 389885     | threonyl-tRNA synthetase                                | EC:6.1.1.3   |            |            | COG0441                                       | J                   |
| Bfl352                 | infC              | 389909       | 390436     | translation initiation factor IF-3                      |              |            |            | COG0290                                       | J                   |
| Bfl353                 | rpml              | 390531       | 390728     | 50S ribosomal subunit protein L35                       |              |            |            | COG0291                                       | J                   |
| Bfl354                 | rplT              | 390826       | 391182     | 50S ribosomal subunit protein L20                       |              |            |            | COG0292                                       | J                   |
| Bfl355                 | pheS              | 391286       | 392293     | phenylalanyl-tRNA synthetase alpha chain                | EC:6.1.1.20  |            |            | COG0016                                       | J                   |
| Bfl356                 | pheT              | 392329       | 394740     | phenylalanyl-tRNA synthetase beta chain                 | EC:6.1.1.20  |            |            | COG0072                                       | J                   |
| Bfl357                 | lplA              | 394844       | 395857     | lipoate-protein ligase A                                | EC:6.-.-     |            |            | COG0095                                       | H                   |
| Bfl358                 | sufA              | 396027       | 396410     | putative HesB-like domain                               |              |            |            | COG0316                                       | S                   |
| Bfl359                 | sufB              | 396424       | 397926     | putative ABC transporter sufB                           |              |            |            | COG0719                                       | R                   |
| Bfl360                 | sufC              | 397993       | 398730     | probable ATP-dependent transporter sufC                 |              |            |            | COG0396                                       | R                   |
| Bfl361                 | sufD              | 398714       | 400015     | required for stability of iron-sulfur component of FhuF |              |            |            | COG0719                                       | R                   |
| Bfl362                 | sufS              | 400012       | 401247     | selenocysteine lyase                                    | EC:4.4.1.16  |            |            | COG0520                                       | E                   |
| Bfl363                 | ynhA              | 401291       | 401722     | conserved hypothetical protein                          |              |            |            | COG2166                                       | R                   |
| Bfl364                 | lpp               | 402058       | 401822     | major outer membrane lipoprotein                        |              |            |            | COG4238                                       | M                   |
| Bfl365                 | tRNA-Val2         | 402258       | 402185     | tRNA-Val anticodon GAC                                  |              |            |            |                                               |                     |
| Bfl366                 | ribE              | 402614       | 403222     | riboflavin synthase alpha chain                         | EC:2.5.1.9   |            |            | COG0307                                       | H                   |
| Bfl367                 | ydhD              | 403359       | 403694     | conserved hypothetical protein                          |              |            |            | COG0278                                       | O                   |
| Bfl368                 | rnt               | 404376       | 403705     | ribonuclease T                                          | EC:3.1.13.-  |            |            | COG0847                                       | L                   |
| Bfl369                 | slyA              | 404931       | 405365     | transcriptional regulator SlyA                          |              |            |            | COG1846                                       | K                   |
| Bfl370                 | pdxH              | 405628       | 406272     | pyridoxamine 5'-phosphate oxidase                       | EC:1.4.3.5   |            |            | COG0259                                       | H                   |
| Bfl371                 | tyrS              | 406416       | 407684     | tyrosyl-tRNA synthetase                                 | EC:6.1.1.1   |            |            | COG0162                                       | J                   |
| Bfl372                 | nth               | 408370       | 407729     | endonuclease III                                        | EC:4.2.99.18 |            |            | COG0177                                       | L                   |
| Bfl373                 | fumC              | 409803       | 408457     | fumarate hydratase class II                             | EC:4.2.1.2   |            |            | COG0114                                       | C                   |
| Bfl374                 | eaeH              | 409944       | 411986     | putative adhesin                                        |              |            |            |                                               | R                   |
| Bfl375                 | ubiX              | 412666       | 412067     | 3-octaprenyl-4-hydroxybenzoate carboxy-lyase            | EC:4.1.1.-   |            |            | COG0163                                       | H                   |

| <b>Bfl gene number</b> | <b>Gene name*</b> | <b>Start</b> | <b>End</b> | <b>Product</b>                                               | <b>EC1</b>   | <b>EC2</b> | <b>EC3</b> | <b>Cluster of orthologous genes (COG) no.</b> | <b>COG category</b> |
|------------------------|-------------------|--------------|------------|--------------------------------------------------------------|--------------|------------|------------|-----------------------------------------------|---------------------|
| Bfl376                 | kdsB              | 413506       | 412730     | 3-deoxy-manno-octulosonate cytidyltransferase                | EC:2.7.7.38  |            |            | COG1212                                       | M                   |
| Bfl377                 | ycaR              | 413688       | 413503     | conserved hypothetical protein                               |              |            |            | COG2835                                       | S                   |
| Bfl378                 | lpxK              | 414751       | 413750     | tetraacyldisaccharide 4'-kinase                              | EC:2.7.1.130 |            |            | COG1663                                       | N                   |
| Bfl379                 | msbA              | 416502       | 414751     | probable transport ATP-binding protein MsbA                  |              |            |            | COG1132                                       | R                   |
| Bfl380                 | rpsA              | 418705       | 416978     | 30S ribosomal protein S1                                     |              |            |            | COG0539                                       | J                   |
| Bfl381                 | cmk               | 419514       | 418816     | cytidylate kinase                                            | EC:2.7.4.14  |            |            | COG0283                                       | F                   |
| Bfl382                 | aroA              | 420936       | 419635     | 3-phosphoshikimate 1-carboxyvinyltransferase                 | EC:2.5.1.19  |            |            | COG0128                                       | E                   |
| Bfl383                 | serC              | 422155       | 421058     | phosphoserine aminotransferase                               | EC:2.6.1.52  |            |            | COG1932                                       | H                   |
| Bfl384                 | serS              | 423649       | 422339     | seryl-tRNA synthetase                                        | EC:6.1.1.11  |            |            | COG0172                                       | J                   |
| Bfl385                 | lolA              | 424784       | 424152     | outer membrane lipoprotein carrier protein precursor         |              |            |            | COG2834                                       | M                   |
| Bfl386                 | ftsK              | 427235       | 424881     | cell division protein FtsK                                   |              |            |            | COG1674                                       | D                   |
| Bfl387                 | trxB              | 427554       | 428525     | thioredoxin reductase                                        | EC:1.6.4.5   |            |            | COG0492                                       | O                   |
| Bfl388                 | infA              | 428649       | 428867     | initiation factor IF-1                                       |              |            |            | COG0361                                       | J                   |
| Bfl389                 | oprC              | 431104       | 428942     | outer membrane protein OprC                                  |              |            |            | COG1629                                       | N                   |
| Bfl390                 | yqeI              | 431534       | 432172     | hypothetical protein                                         |              |            |            | COG3710                                       | S                   |
| Bfl391                 | mltE              | 433207       | 432452     | membrane-bound lytic murein transglycosylase E               | EC:3.2.1.-   |            |            | COG0741                                       | M                   |
| Bfl392                 | trmU              | 433593       | 434702     | tRNA (5-methylaminomethyl-2-thiouridylate)-methyltransferase | EC:2.1.1.61  |            |            | COG0482                                       | R                   |
| Bfl393                 | purB              | 434941       | 436326     | adenylosuccinate lyase                                       | EC:4.3.2.2   |            |            | COG0015                                       | F                   |
| Bfl394                 | lolE              | 437679       | 436429     | ABC transporter integral membrane subunit                    |              |            |            | COG4591                                       | M                   |
| Bfl395                 | lolD              | 438413       | 437706     | ABC transporter ATP-binding subunit                          |              |            |            | COG1136                                       | M                   |
| Bfl396                 | yefU              | 439620       | 438403     | ABC transporter integral membrane subunit                    |              |            |            | COG4591                                       | M                   |
| Bfl397                 | yefM              | 440303       | 439737     | putative lipoprotein                                         |              |            |            | COG3417                                       | S                   |
| Bfl398                 | yefF              | 440895       | 440539     | putative protein kinase C inhibitor                          |              |            |            | COG0537                                       | F                   |
| Bfl399                 | yefH              | 441781       | 441002     | putative deoxyribonuclease                                   | EC:3.1.21.-  |            |            | COG0084                                       | R                   |
| Bfl400                 | holB              | 442801       | 441800     | DNA polymerase III, delta prime subunit                      | EC:2.7.7.7   |            |            | COG0470                                       | L                   |
| Bfl401                 | tmk               | 443448       | 442813     | thymidylate kinase                                           | EC:2.7.4.9   |            |            | COG0125                                       | F                   |
| Bfl402                 | pabC              | 444440       | 443622     | 4-amino-4-deoxychorismate lyase                              | EC:4.-.-     |            |            | COG0115                                       | E                   |
| Bfl403                 | acpP              | 444803       | 444567     | acyl carrier protein                                         |              |            |            | COG0236                                       | I                   |

| Bfl gene number | Gene name* | Start  | End    | Product                                          | EC1          | EC2         | EC3 | Cluster of orthologous genes (COG) no. | COG category |
|-----------------|------------|--------|--------|--------------------------------------------------|--------------|-------------|-----|----------------------------------------|--------------|
| Bfl404          | fabG       | 445674 | 444940 | 3-oxoacyl-[acyl-carrier protein] reductase       | EC:1.1.1.100 |             |     | COG1028                                | R            |
| Bfl405          | fabD       | 446678 | 445713 | malonyl CoA-acyl carrier protein transacylase    | EC:2.3.1.39  |             |     | COG0331                                | I            |
| Bfl406          | fabH       | 447663 | 446707 | 3-oxoacyl-[acyl-carrier-protein] synthase III    | EC:2.3.1.41  |             |     | COG0332                                | I            |
| Bfl407          | plsX       | 448709 | 447675 | fatty acid/phospholipid synthesis protein PlsX   |              |             |     | COG0416                                | I            |
| Bfl408          | rpmF       | 448900 | 448730 | 50S ribosomal protein L32                        |              |             |     | COG0333                                | J            |
| Bfl409          | rluC       | 450316 | 449348 | ribosomal large subunit pseudouridine synthase C | EC:4.2.1.70  |             |     | COG0564                                | J            |
| Bfl410          | rne        | 450736 | 452868 | ribonuclease E                                   | EC:3.1.4.-   |             |     | COG1530                                | J            |
| Bfl411          | htrB       | 453267 | 454193 | lipid A biosynthesis lauroyl acyltransferase     | EC:2.3.1.-   |             |     | COG1560                                | N            |
| Bfl412          | ybiS       | 454314 | 455209 | pseudogene of putative exported protein          |              |             |     | COG1376                                | S            |
| Bfl413          | tRNA-Leu2  | 455378 | 455296 | tRNA-Leu anticodon TAA                           |              |             |     |                                        |              |
| Bfl414          | tRNA-Cys   | 455468 | 455398 | tRNA-Cys anticodon GCA                           |              |             |     |                                        |              |
| Bfl415          | pgsA       | 456443 | 455871 | phosphatidylglycerophosphate synthetase          | EC:2.7.8.5   |             |     | COG0558                                | I            |
| Bfl416          | tRNA-Lys2  | 456857 | 456786 | tRNA-Lys anticodon CTT                           |              |             |     |                                        |              |
| Bfl417          | tRNA-Ser3  | 457082 | 456999 | tRNA-Ser anticodon TGA                           |              |             |     |                                        |              |
| Bfl418          | yccK       | 457230 | 457559 | putative sulfite reductase                       | EC:1.8.99.3  |             |     | COG2920                                | R            |
| Bfl419          | yccV       | 457762 | 458079 | conserved hypothetical protein                   |              |             |     | COG3785                                | S            |
| Bfl420          | fabA       | 458444 | 458962 | D-3-hydroxydecanoyl-(acyl carrier-protein)       | EC:4.2.1.60  |             |     | COG0764                                | I            |
| Bfl421          | asnS       | 459061 | 460473 | asparaginyl-tRNA synthetase                      | EC:6.1.1.22  |             |     | COG0017                                | J            |
| Bfl422          | aspC       | 460603 | 461823 | aspartate aminotransferase                       | EC:2.6.1.1   |             |     | COG1448                                | E            |
| Bfl423          | ycbL       | 462523 | 461888 | conserved hypothetical protein                   |              |             |     | COG0491                                | R            |
| Bfl424          | fabI       | 463402 | 462617 | enoyl-[acyl-carrier-protein] reductase (NADH)    | EC:1.3.1.9   |             |     | COG0623                                | I            |
| Bfl425          | ribA       | 464182 | 464781 | GTP cyclohydrolase II                            | EC:3.5.4.25  |             |     | COG0807                                | H            |
| Bfl426          | trpE       | 465508 | 467073 | anthranilate synthase component I                | EC:4.1.3.27  |             |     | COG0147                                | E            |
| Bfl427          | trpG       | 467081 | 467662 | anthranilate synthase component II               | EC:4.1.3.27  |             |     | COG0512                                | E            |
| Bfl428          | trpD       | 467677 | 468699 | anthranilate phosphoribosyltransferase           | EC:2.4.2.18  |             |     | COG0512                                | E            |
| Bfl429          | trpC       | 468711 | 470087 | indole-3-glycerol phosphate synthase             | EC:4.1.1.48  | EC:5.3.1.24 |     | COG0134                                | E            |
| Bfl430          | trpB       | 470124 | 471320 | tryptophan synthase beta chain                   | EC:4.2.1.20  |             |     | COG0133                                | E            |
| Bfl431          | trpA       | 471317 | 472132 | tryptophan synthase alpha chain                  | EC:4.2.1.20  |             |     | COG0159                                | E            |
| Bfl432          | tonB       | 473616 | 472837 | TonB protein                                     |              |             |     | COG0810                                | M            |

| <b>Bfl gene number</b> | <b>Gene name*</b> | <b>Start</b> | <b>End</b> | <b>Product</b>                               | <b>EC1</b>  | <b>EC2</b> | <b>EC3</b> | <b>Cluster of orthologous genes (COG) no.</b> | <b>COG category</b> |
|------------------------|-------------------|--------------|------------|----------------------------------------------|-------------|------------|------------|-----------------------------------------------|---------------------|
| Bfl433                 | cls               | 473951       | 475426     | cardiolipin synthetase                       | EC:2.7.8.-  |            |            | COG1502                                       | I                   |
| Bfl434                 | tdk               | 476183       | 475605     | thymidine kinase                             | EC:2.7.1.21 |            |            | COG1435                                       | F                   |
| Bfl435                 | xthA              | 477241       | 478044     | exodeoxyribonuclease III                     | EC:3.1.11.2 |            |            | COG0708                                       | L                   |
| Bfl436                 | sppA              | 478172       | 480049     | protease IV, a signal peptide peptidase      | EC:3.4.21.- |            |            | COG0616                                       | N                   |
| Bfl437                 | gapA              | 480436       | 481437     | glyceraldehyde 3-phosphate dehydrogenase A   | EC:1.2.1.12 |            |            | COG0057                                       | G                   |
| Bfl438                 | dsbB              | 481718       | 482242     | disulfide bond formation protein B           |             |            |            | COG1495                                       | O                   |
| Bfl439                 | minC              | 482387       | 483103     | septum site determining protein MinC         |             |            |            | COG0850                                       | D                   |
| Bfl440                 | minD              | 483114       | 483938     | septum site determining protein MinD         |             |            |            | COG2894                                       | D                   |
| Bfl441                 | minE              | 483945       | 484247     | cell division topological specificity factor |             |            |            | COG0851                                       | D                   |
| Bfl442                 | yeaZ              | 484963       | 484301     | conserved hypothetical protein               |             |            |            | COG1214                                       | O                   |
| Bfl443                 | pabB              | 485126       | 486511     | para-aminobenzoate synthase component I      | EC:4.1.3.-  |            |            | COG0147                                       | E                   |
| Bfl444                 | yoaE              | 488134       | 486575     | putative membrane protein                    |             |            |            | COG0861                                       | P                   |
| Bfl445                 | manX              | 488572       | 489561     | PTS system, mannose-specific IIAB component  | EC:2.7.1.69 |            |            | COG2893                                       | G                   |
| Bfl446                 | manY              | 489677       | 490492     | phosphotransferase enzyme II, C component    |             |            |            | COG3715                                       | G                   |
| Bfl447                 | manZ              | 490505       | 491377     | phosphotransferase enzyme II, D component    |             |            |            | COG3716                                       | G                   |
| Bfl448                 | cspC              | 491758       | 491549     | cold shock-like protein CspC                 |             |            |            | COG1278                                       | T                   |
| Bfl449                 | zwf               | 494125       | 492629     | glucose 6-phosphate dehydrogenase            | EC:1.1.1.49 |            |            | COG0364                                       | G                   |
| Bfl450                 | pykA              | 494615       | 496081     | pyruvate kinase A                            | EC:2.7.1.40 |            |            | COG0469                                       | G                   |
| Bfl451                 | yebA              | 497569       | 496178     | conserved hypothetical protein               |             |            |            | COG0739                                       | M                   |
| Bfl452                 | aspS              | 499511       | 497781     | aspartyl-tRNA synthetase                     | EC:6.1.1.12 |            |            | COG0173                                       | J                   |
| Bfl453                 | argS              | 499941       | 501692     | arginyl-tRNA synthetase                      | EC:6.1.1.19 |            |            | COG0018                                       | J                   |
| Bfl454                 | mviN              | 503270       | 501714     | virulence factor MviN                        |             |            |            | COG0728                                       | R                   |
| Bfl455                 | yceL              | 503795       | 505000     | putative membrane transporter                |             |            |            | COG0477                                       | G                   |
| Bfl456                 | tRNA-Ser2         | 505261       | 505174     | tRNA-Ser anticodon GGA                       |             |            |            |                                               |                     |
| Bfl457                 | tRNA-Ser1         | 505721       | 505634     | tRNA-Ser anticodon CGA                       |             |            |            |                                               |                     |
| Bfl458                 | tRNA-Asn          | 505969       | 505897     | tRNA-Asn anticodon GTT                       |             |            |            |                                               |                     |
| Bfl459                 | gutQ              | 507023       | 506043     | putative phosphosugar binding protein        |             |            |            | COG0517                                       | R                   |
| Bfl460                 | yeeX              | 507763       | 507437     | conserved hypothetical protein               |             |            |            | COG2926                                       | S                   |
| Bfl461                 | sbcB              | 508047       | 509552     | exodeoxyribonuclease I                       | EC:3.1.11.1 |            |            | COG2925                                       | L                   |

| <b>Bfl gene number</b> | <b>Gene name*</b> | <b>Start</b> | <b>End</b> | <b>Product</b>                                                              | <b>EC1</b>  | <b>EC2</b>  | <b>EC3</b> | <b>Cluster of orthologous genes (COG) no.</b> | <b>COG category</b> |
|------------------------|-------------------|--------------|------------|-----------------------------------------------------------------------------|-------------|-------------|------------|-----------------------------------------------|---------------------|
| Bfl462                 | hisG              | 509860       | 510759     | ATP phosphoribosyltransferase                                               | EC:2.4.2.17 |             |            | COG0040                                       | E                   |
| Bfl463                 | hisD              | 510764       | 512077     | histidinol dehydrogenase                                                    | EC:1.1.1.23 |             |            | COG0141                                       | E                   |
| Bfl464                 | hisC              | 512074       | 513144     | histidinol-phosphate aminotransferase                                       | EC:2.6.1.9  |             |            | COG0079                                       | E                   |
| Bfl465                 | hisB              | 513168       | 514241     | imidazoleglycerol-phosphate dehydratase; histidinol phosphatase             | EC:3.1.3.15 | EC:4.2.1.19 |            | COG0131                                       | E                   |
| Bfl466                 | hisH              | 514238       | 514828     | glutamine amidotransferase, subunit with HisF                               | EC:2.4.2.-  |             |            | COG0118                                       | E                   |
| Bfl467                 | hisA              | 514835       | 515590     | phosphoribosylformimino-5-aminoimidazole carboxamide ribotide isomerase     | EC:5.3.1.16 |             |            | COG0106                                       | E                   |
| Bfl468                 | hisF              | 515560       | 516336     | imidazole glycerol phosphate synthase, subunit with HisH                    | EC:4.1.3.-  |             |            | COG0107                                       | E                   |
| Bfl469                 | hisI              | 516330       | 516971     | phosphoribosyl-AMP cyclohydrolase / phosphoribosyl-ATP pyrophosphohydrolase | EC:3.5.4.19 | EC:3.6.1.31 |            | COG0140                                       | E                   |
| Bfl470                 | gnd               | 518526       | 517102     | 6-phosphogluconate dehydrogenase, decarboxylating                           | EC:1.1.1.44 |             |            | COG0362                                       | G                   |
| Bfl471                 | metG              | 518883       | 520520     | methionyl-tRNA synthetase                                                   | EC:6.1.1.10 |             |            | COG0143                                       | J                   |
| Bfl472                 | folE              | 521340       | 520675     | GTP cyclohydrolase I                                                        | EC:3.5.4.16 |             |            | COG0302                                       | H                   |
| Bfl473                 | rplY              | 521617       | 521928     | 50s ribosomal protein L25                                                   |             |             |            | COG1825                                       | J                   |
| Bfl474                 | ddlA              | 523025       | 521961     | D-alanine:D-alanine ligase A                                                | EC:6.3.2.4  |             |            | COG1181                                       | M                   |
| Bfl475                 | omp               | 524270       | 523140     | outer membrane protein                                                      |             |             |            | COG3203                                       | N                   |
| Bfl476                 | gyrA              | 527292       | 524704     | DNA gyrase subunit A                                                        | EC:5.99.1.3 |             |            | COG0188                                       | L                   |
| Bfl477                 | ubiG              | 527499       | 528236     | 3-demethylubiquinone-9 3-methyltransferase                                  | EC:2.1.1.64 |             |            | COG2227                                       | H                   |
| Bfl478                 | nrdA              | 528624       | 530909     | ribonucleoside-diphosphate reductase I alpha chain                          | EC:1.17.4.1 |             |            | COG0209                                       | F                   |
| Bfl479                 | nrdB              | 530938       | 532068     | ribonucleoside-diphosphate reductase I beta chain                           | EC:1.17.4.1 |             |            | COG0208                                       | F                   |
| Bfl480                 | yfaE              | 532043       | 532330     | putative ferredoxin                                                         |             |             |            | COG0633                                       | C                   |
| Bfl481                 | nuoN              | 533956       | 532442     | NADH dehydrogenase I chain N                                                | EC:1.6.5.3  |             |            | COG1007                                       | C                   |
| Bfl482                 | nuoM              | 535561       | 534032     | NADH dehydrogenase I chain M                                                | EC:1.6.5.3  |             |            | COG1008                                       | C                   |
| Bfl483                 | nuoL              | 537483       | 535606     | NADH dehydrogenase I chain L                                                | EC:1.6.5.3  |             |            | COG1009                                       | C                   |
| Bfl484                 | nuoK              | 537782       | 537480     | NADH dehydrogenase I chain k                                                | EC:1.6.5.3  |             |            | COG0713                                       | C                   |
| Bfl485                 | nuoJ              | 538333       | 537782     | NADH dehydrogenase I chain J                                                | EC:1.6.5.3  |             |            | COG0839                                       | C                   |
| Bfl486                 | nuoI              | 538908       | 538363     | NADH dehydrogenase I chain I                                                | EC:1.6.5.3  |             |            | COG1143                                       | C                   |
| Bfl487                 | nuoH              | 539903       | 538935     | NADH dehydrogenase I chain H                                                | EC:1.6.5.3  |             |            | COG1005                                       | C                   |

| <b>Bfl gene number</b> | <b>Gene name*</b> | <b>Start</b> | <b>End</b> | <b>Product</b>                                  | <b>EC1</b>  | <b>EC2</b>  | <b>EC3</b> | <b>Cluster of orthologous genes (COG) no.</b> | <b>COG category</b> |
|------------------------|-------------------|--------------|------------|-------------------------------------------------|-------------|-------------|------------|-----------------------------------------------|---------------------|
| Bfl488                 | nuoG              | 542725       | 539900     | NADH dehydrogenase I chain G                    | EC:1.6.5.3  |             |            | COG1034                                       | C                   |
| Bfl489                 | nuoF              | 544175       | 542838     | NADH dehydrogenase I chain F                    | EC:1.6.5.3  |             |            | COG1894                                       | C                   |
| Bfl490                 | nuoE              | 544642       | 544178     | NADH dehydrogenase I chain E                    | EC:1.6.5.3  |             |            | COG1905                                       | C                   |
| Bfl491                 | nuoCD             | 546523       | 544733     | NADH dehydrogenase I chain C; chain D           | EC:1.6.5.3  |             |            | COG0649                                       | C                   |
| Bfl492                 | nuoB              | 547324       | 546653     | NADH dehydrogenase I chain B                    | EC:1.6.5.3  |             |            | COG0377                                       | C                   |
| Bfl493                 | nuoA              | 547761       | 547330     | NADH dehydrogenase I chain A                    | EC:1.6.5.3  |             |            | COG0838                                       | C                   |
| Bfl494                 | folC              | 549446       | 548199     | folypolyglutamate synthase                      | EC:6.3.2.17 | EC:6.3.2.12 |            | COG0285                                       | H                   |
| Bfl495                 | accD              | 550403       | 549540     | acetyl-CoA carboxylase beta subunit             | EC:6.4.1.2  |             |            | COG0777                                       | I                   |
| Bfl496                 | truA              | 551280       | 550522     | tRNA pseudouridine synthase A                   | EC:4.2.1.70 |             |            | COG0101                                       | J                   |
| Bfl497                 | pdxB              | 552555       | 551437     | erythronate-4-phosphate dehydrogenase           | EC:1.1.1.-  |             |            | COG0111                                       | C                   |
| Bfl498                 | fabB              | 554051       | 552834     | 3-oxoacyl-[acyl-carrier-protein] synthase I     | EC:2.3.1.41 |             |            | COG0304                                       | I                   |
| Bfl499                 | yfcB              | 554680       | 555591     | conserved hypothetical protein                  | EC:2.1.1.72 |             |            | COG2890                                       | R                   |
| Bfl500                 | aroC              | 555595       | 556668     | chorismate synthase                             | EC:4.6.1.4  |             |            | COG0082                                       | E                   |
| Bfl501                 | tRNA-Arg2         | 556932       | 556861     | tRNA-Arg anticodon CCT                          |             |             |            |                                               |                     |
| Bfl502                 | mntH              | 558390       | 557152     | manganese transport protein MntH                |             |             |            | COG1914                                       | P                   |
| Bfl503                 | nupC              | 558663       | 559877     | nucleoside permease NupC                        |             |             |            | COG1972                                       | F                   |
| Bfl504                 | gltX              | 561718       | 560267     | glutamyl-tRNA synthetase                        | EC:6.1.1.17 |             |            | COG0008                                       | J                   |
| Bfl505                 | tRNA-Val1         | 561940       | 561868     | tRNA-Val anticodon TAC                          |             |             |            |                                               |                     |
| Bfl506                 | tRNA-Lys1         | 562056       | 561984     | tRNA-Lys anticodon TTT                          |             |             |            |                                               |                     |
| Bfl507                 | lig               | 563944       | 562160     | DNA ligase                                      | EC:6.5.1.2  |             |            | COG0272                                       | L                   |
| Bfl508                 | cysK              | 564242       | 565186     | cysteine synthase A                             | EC:4.2.99.8 |             |            | COG0031                                       | E                   |
| Bfl509                 | ptsH              | 565535       | 565807     | phosphocarrier protein HPr                      |             |             |            | COG1925                                       | G                   |
| Bfl510                 | ptsI              | 565839       | 567563     | phosphoenolpyruvate-protein phosphotransferase  | EC:2.7.3.9  |             |            | COG1080                                       | G                   |
| Bfl511                 | cysA              | 568739       | 567687     | sulphate transport ATP-binding protein CysA     |             |             |            | COG1118                                       | P                   |
| Bfl512                 | cysW              | 569626       | 568769     | sulphate transport system permease protein CysW |             |             |            | COG4208                                       | P                   |
| Bfl513                 | cysU              | 570464       | 569628     | sulphate transport system permease protein CysU |             |             |            | COG0555                                       | P                   |
| Bfl514                 | cysP              | 571503       | 570469     | thiosulphate-binding protein precursor          |             |             |            | COG1613                                       | P                   |
| Bfl515                 | talA              | 572171       | 573142     | transaldolase A                                 | EC:2.2.1.2  |             |            | COG0176                                       | G                   |
| Bfl516                 | tktA              | 573156       | 575150     | transketolase                                   | EC:2.2.1.1  |             |            | COG0021                                       | G                   |

| <b>Bfl gene number</b> | <b>Gene name*</b> | <b>Start</b> | <b>End</b> | <b>Product</b>                                                           | <b>EC1</b>   | <b>EC2</b> | <b>EC3</b> | <b>Cluster of orthologous genes (COG) no.</b> | <b>COG category</b> |
|------------------------|-------------------|--------------|------------|--------------------------------------------------------------------------|--------------|------------|------------|-----------------------------------------------|---------------------|
| Bfl517                 | dapE              | 575233       | 576387     | succinyl-diaminopimelate desuccinylase                                   | EC:3.5.1.18  |            |            | COG0624                                       | E                   |
| Bfl518                 | dapA              | 577859       | 576981     | dihydrodipicolinate synthase                                             | EC:4.2.1.52  |            |            | COG0329                                       | E                   |
| Bfl519                 | bcp               | 578340       | 578819     | bacterioferritin comigratory protein                                     |              |            |            | COG1225                                       | O                   |
| Bfl520                 | upp               | 579510       | 578884     | uracil phosphoribosyltransferase                                         | EC:2.4.2.9   |            |            | COG0035                                       | F                   |
| Bfl521                 | ureG              | 580938       | 580309     | putative urease accessory protein G                                      |              |            |            | COG0378                                       | F                   |
| Bfl522                 | ureF              | 581714       | 581031     | putative urease accessory protein F                                      |              |            |            | COG0830                                       | F                   |
| Bfl523                 | ureC              | 583716       | 582013     | putative urease structural subunit C (alpha)                             | EC:3.5.1.5   |            |            | COG0804                                       | F                   |
| Bfl524                 | ureB              | 584030       | 583719     | putative urease structural subunit B (beta)                              | EC:3.5.1.5   |            |            | COG0832                                       | F                   |
| Bfl525                 | ureA              | 584368       | 584066     | putative urease structural subunit A (gamma)                             | EC:3.5.1.5   |            |            | COG0831                                       | F                   |
| Bfl526                 | ureD              | 585245       | 584385     | putative urease accessory protein D                                      |              |            |            | COG0829                                       | F                   |
| Bfl527                 | guaA              | 586991       | 585411     | GMP synthase (glutamine-hydrolyzing)                                     | EC:6.3.5.2   |            |            | COG0518                                       | F                   |
| Bfl528                 | guaB              | 588525       | 587056     | inosine-5'-monophosphate dehydrogenase                                   | EC:1.1.1.205 |            |            | COG0516                                       | F                   |
| Bfl529                 | mgo               | 588920       | 590494     | probable malate:quinone oxidoreductase (malate dehydrogenase (acceptor)) | EC:1.1.99.16 |            |            | COG0579                                       | R                   |
| Bfl530                 | engA              | 592011       | 590554     | putative GTP-binding protein                                             |              |            |            | COG1160                                       | R                   |
| Bfl531                 | hisS              | 593408       | 592107     | histidyl-tRNA synthetase                                                 | EC:6.1.1.21  |            |            | COG0124                                       | J                   |
| Bfl532                 | gcpE              | 594331       | 593566     | pseudogene of GcpE protein (protein E)                                   |              |            |            | COG0821                                       | M                   |
| Bfl533                 | ndk               | 596452       | 596042     | nucleoside diphosphate kinase                                            | EC:2.7.4.6   |            |            | COG0105                                       | F                   |
| Bfl534                 | nifS              | 597951       | 596764     | putative L-cysteine desulfurase                                          | EC:4.4.1.-   |            |            | COG1104                                       | E                   |
| Bfl535                 | suhB              | 598453       | 599277     | putative myo-inositol-1(or 4)-monophosphatase                            | EC:3.1.3.25  |            |            | COG0483                                       | G                   |
| Bfl536                 | glyA              | 600630       | 599386     | serine hydroxymethyltransferase                                          | EC:2.1.2.1   |            |            | COG0112                                       | E                   |
| Bfl537                 | yfhC              | 601183       | 600704     | putative cytosine/adenosine deaminase                                    | EC:3.5.4.1   |            |            | COG0590                                       | F                   |
| Bfl538                 | acpS              | 601704       | 601327     | holo-[acyl-carrier protein] synthase                                     | EC:2.7.8.7   |            |            | COG0736                                       | I                   |
| Bfl539                 | pdxJ              | 602444       | 601701     | putative pyridoxal phosphate biosynthetic protein                        |              |            |            | COG0854                                       | H                   |
| Bfl540                 | rnc               | 603368       | 602670     | ribonuclease III                                                         | EC:3.1.26.3  |            |            | COG0571                                       | K                   |
| Bfl541                 | lepB              | 604501       | 603503     | signal peptidase I                                                       | EC:3.4.21.89 |            |            | COG0681                                       | N                   |
| Bfl542                 | lepA              | 606344       | 604545     | GTP-binding protein LepA                                                 |              |            |            | COG0481                                       | N                   |
| Bfl543                 | ung               | 606597       | 607262     | uracil-DNA glycosylase                                                   | EC:3.2.2.-   |            |            | COG0692                                       | L                   |
| Bfl544                 | grpE              | 608081       | 607494     | heat shock protein GrpE                                                  |              |            |            | COG0576                                       | O                   |

| <b>Bfl gene number</b> | <b>Gene name*</b> | <b>Start</b> | <b>End</b> | <b>Product</b>                                                                                    | <b>EC1</b>  | <b>EC2</b>  | <b>EC3</b> | <b>Cluster of orthologous genes (COG) no.</b> | <b>COG category</b> |
|------------------------|-------------------|--------------|------------|---------------------------------------------------------------------------------------------------|-------------|-------------|------------|-----------------------------------------------|---------------------|
| Bfl545                 | yfjB              | 608206       | 609087     | probable inorganic polyphosphate/ATP-NAD kinase                                                   | EC:2.7.1.23 |             |            | COG0061                                       | R                   |
| Bfl546                 | smpA              | 609173       | 609520     | small membrane protein A                                                                          |             |             |            | COG2913                                       | S                   |
| Bfl547                 | yfjG              | 610048       | 609605     | conserved hypothetical protein                                                                    |             |             |            | COG2867                                       | S                   |
| Bfl548                 | smpB              | 610196       | 610642     | small protein B; putative tmRNA-binding protein                                                   |             |             |            | COG0691                                       | O                   |
| Bfl549                 | tmRNA             | 611082       | 610694     | tmRNA                                                                                             |             |             |            |                                               |                     |
| Bfl550                 | emrE              | 611253       | 611582     | emrE protein (methyl viologen resistance protein C) (ethidium resistance protein)                 |             |             |            | COG2076                                       | P                   |
| Bfl551                 | pssA              | 611675       | 613060     | phosphatidylserine synthase (CDP-diacylglycerol-serine O-phosphatidyltransferase)                 | EC:2.7.8.8  |             |            | COG1502                                       | I                   |
| Bfl552                 | 23SrRNA           | 616171       | 613128     | 23S rRNA                                                                                          |             |             |            |                                               |                     |
| Bfl553                 | tRNA-Glu          | 616408       | 616337     | tRNA-Glu anticodon TTC                                                                            |             |             |            |                                               |                     |
| Bfl554                 | 16SrRNA           | 618033       | 616478     | 16S rRNA                                                                                          |             |             |            |                                               |                     |
| Bfl555                 | purH              | 618462       | 620111     | phosphoribosylaminoimidazolecarboxamide formyltransferase, IMP cyclohydrolase and MGS-like domain | EC:2.1.2.3  | EC:3.5.4.10 |            | COG0138                                       | F                   |
| Bfl556                 | rpoC              | 624491       | 620229     | DNA-directed RNA polymerase, beta-prime-subunit                                                   | EC:2.7.7.6  |             |            | COG0086                                       | K                   |
| Bfl557                 | rpoB              | 628634       | 624606     | DNA-directed RNA polymerase, beta-subunit                                                         | EC:2.7.7.6  |             |            | COG0085                                       | K                   |
| Bfl558                 | rplL              | 629221       | 628841     | 50S ribosomal subunit protein L7/L12                                                              |             |             |            | COG0222                                       | J                   |
| Bfl559                 | rplJ              | 629813       | 629316     | 50S ribosomal subunit protein L10                                                                 |             |             |            | COG0244                                       | J                   |
| Bfl560                 | rplA              | 630838       | 630131     | 50S ribosomal subunit protein L1                                                                  |             |             |            | COG0081                                       | J                   |
| Bfl561                 | rplK              | 631275       | 630835     | 50S ribosomal subunit protein L11                                                                 |             |             |            | COG0080                                       | J                   |
| Bfl562                 | nusG              | 631928       | 631383     | transcription antitermination protein NusG                                                        |             |             |            | COG0250                                       | K                   |
| Bfl563                 | secE              | 632304       | 631930     | preprotein translocase SecE subunit                                                               |             |             |            | COG0690                                       | N                   |
| Bfl564                 | tuf               | 633643       | 632459     | elongation factor Tu (EF-Tu)                                                                      | EC:3.6.1.48 |             |            | COG0050                                       | J                   |
| Bfl565                 | fusA              | 635872       | 633743     | elongation factor G (EF-G)                                                                        | EC:3.6.1.48 |             |            | COG0480                                       | J                   |
| Bfl566                 | rpsG              | 636453       | 635980     | 30S ribosomal subunit protein S7                                                                  |             |             |            | COG0049                                       | J                   |
| Bfl567                 | rpsL              | 636975       | 636601     | 30S ribosomal subunit protein S12                                                                 |             |             |            | COG0048                                       | J                   |
| Bfl568                 | pabA              | 638311       | 637730     | para-aminobenzoate synthase, glutamine amidotransferase component II                              | EC:4.1.3.-  |             |            | COG0512                                       | E                   |

| <b>Bfl gene number</b> | <b>Gene name*</b> | <b>Start</b> | <b>End</b> | <b>Product</b>                             | <b>EC1</b>  | <b>EC2</b> | <b>EC3</b> | <b>Cluster of orthologous genes (COG) no.</b> | <b>COG category</b> |
|------------------------|-------------------|--------------|------------|--------------------------------------------|-------------|------------|------------|-----------------------------------------------|---------------------|
| Bfl569                 | trpS              | 639475       | 638471     | tryptophanyl-tRNA synthetase               | EC:6.1.1.2  |            |            | COG0180                                       | J                   |
| Bfl570                 | rpe               | 640399       | 639719     | ribulose-phosphate 3-epimerase             | EC:5.1.3.1  |            |            | COG0036                                       | G                   |
| Bfl571                 | aroB              | 641790       | 640696     | 3-dehydroquinate synthase                  | EC:4.6.1.3  |            |            | COG0337                                       | E                   |
| Bfl572                 | aroK              | 642392       | 641835     | shikimate kinase I                         | EC:2.7.1.71 |            |            | COG0703                                       | E                   |
| Bfl573                 | yhgI              | 643461       | 644078     | conserved hypothetical protein             |             |            |            | COG0694                                       | O                   |
| Bfl574                 | asd               | 645359       | 644244     | aspartate-semialdehyde dehydrogenase       | EC:1.2.1.11 |            |            | COG0136                                       | E                   |
| Bfl575                 | yhgN              | 645579       | 646172     | putative inner membrane protein            |             |            |            | COG2095                                       | S                   |
| Bfl576                 | yigL              | 647322       | 646522     | putative hydrolase of the HAD superfamily  |             |            |            | COG0561                                       | R                   |
| Bfl577                 | corA              | 648511       | 647567     | magnesium and cobalt transport protein     |             |            |            | COG0598                                       | P                   |
| Bfl578                 | yigB              | 649628       | 648900     | putative hydrolase of the HAD superfamily  |             |            |            | COG1011                                       | R                   |
| Bfl579                 | dapF              | 650481       | 649651     | diaminopimelate epimerase                  | EC:5.1.1.7  |            |            | COG0253                                       | E                   |
| Bfl580                 | hemC              | 650907       | 651842     | prophobilinogen deaminase                  | EC:4.3.1.8  |            |            | COG0181                                       | H                   |
| Bfl581                 | hemD              | 651868       | 652611     | uroporphyrinogen III synthase              | EC:4.2.1.75 |            |            | COG1587                                       | H                   |
| Bfl582                 | tRNA-Pro          | 652786       | 652713     | tRNA-Pro anticodon TGG                     |             |            |            |                                               |                     |
| Bfl583                 | tRNA-Leu1         | 652885       | 652799     | tRNA-Leu anticodon CAG                     |             |            |            |                                               |                     |
| Bfl584                 | tRNA-His          | 652988       | 652916     | tRNA-His anticodon GTG                     |             |            |            |                                               |                     |
| Bfl585                 | tRNA-Arg1         | 653133       | 653060     | tRNA-Arg anticodon CCG                     |             |            |            |                                               |                     |
| Bfl586                 | rho               | 654689       | 653430     | transcription termination factor Rho       |             |            |            | COG1158                                       | K                   |
| Bfl587                 | trxA              | 655399       | 655058     | thioredoxin I, redox factor                |             |            |            | COG0526                                       | O                   |
| Bfl588                 | ilvC              | 657021       | 655543     | ketol-acid reductoisomerase                | EC:1.1.1.86 |            |            | COG0059                                       | E                   |
| Bfl589                 | ilvA              | 658643       | 657099     | threonine deaminase                        | EC:4.2.1.16 |            |            | COG1171                                       | E                   |
| Bfl590                 | ilvD              | 660538       | 658682     | dihydroxyacid dehydratase                  | EC:4.2.1.9  |            |            | COG0129                                       | E                   |
| Bfl591                 | ilvE              | 661540       | 660617     | branched-chain amino-acid aminotransferase | EC:2.6.1.42 |            |            | COG0115                                       | E                   |
| Bfl592                 | ilvM              | 661847       | 661611     | acetolactate synthase II, small subunit    | EC:4.1.3.18 |            |            | COG0440                                       | E                   |
| Bfl593                 | ilvG              | 663556       | 661892     | acetolactate synthase II, large subunit    | EC:4.1.3.18 |            |            | COG0028                                       | E                   |
| Bfl594                 | tRNA-Trp          | 664046       | 663975     | tRNA-Trp anticodon CCA                     |             |            |            |                                               |                     |
| Bfl595                 | tRNA-Asp          | 664177       | 664104     | tRNA-Asp anticodon GTC                     |             |            |            |                                               |                     |
| Bfl596                 | tRNA-Ala          | 664314       | 664242     | tRNA-Ala anticodon TGC                     |             |            |            |                                               |                     |
| Bfl597                 | metF              | 666003       | 665107     | 5,10 methylenetetrahydrofolate reductase   | EC:1.7.99.5 |            |            | COG0685                                       | E                   |

| <b>Bfl gene number</b> | <b>Gene name*</b> | <b>Start</b> | <b>End</b> | <b>Product</b>                                             | <b>EC1</b>  | <b>EC2</b> | <b>EC3</b> | <b>Cluster of orthologous genes (COG) no.</b> | <b>COG category</b> |
|------------------------|-------------------|--------------|------------|------------------------------------------------------------|-------------|------------|------------|-----------------------------------------------|---------------------|
| Bfl598                 | metB              | 667310       | 666153     | cystathionine gamma-synthase                               | EC:4.2.99.9 |            |            | COG0626                                       | E                   |
| Bfl599                 | rpmE              | 667721       | 667500     | 50S ribosomal protein L31                                  |             |            |            | COG0254                                       | J                   |
| Bfl600                 | fpr               | 668321       | 669070     | ferredoxin--NADP reductase                                 | EC:1.18.1.2 |            |            | COG1018                                       | C                   |
| Bfl601                 | tpiA              | 669260       | 670048     | triosephosphate isomerase                                  | EC:5.3.1.1  |            |            | COG0149                                       | G                   |
| Bfl602                 | pfkA              | 671076       | 670114     | 6-phosphofructokinase                                      | EC:2.7.1.11 |            |            | COG0205                                       | G                   |
| Bfl603                 | cysE              | 672145       | 671411     | serine acetyltransferase                                   | EC:2.3.1.30 |            |            | COG1045                                       | E                   |
| Bfl604                 | gpsA              | 673232       | 672231     | glycerol-3-phosphate dehydrogenase                         | EC:1.1.1.94 |            |            | COG0240                                       | C                   |
| Bfl605                 | grxC              | 673941       | 673675     | glutaredoxin 3                                             |             |            |            | COG0695                                       | O                   |
| Bfl606                 | yibN              | 674412       | 673969     | putative Rhodanese-related sulfurtransferases              |             |            |            | COG0607                                       | P                   |
| Bfl607                 | rfaD              | 674838       | 675773     | ADP-L-Glycero-D-mannoheptose-6-epimerase                   | EC:5.1.3.20 |            |            | COG0451                                       | M                   |
| Bfl608                 | rfaF              | 675817       | 676872     | ADP-heptose; lipopolysaccharide heptosyltransferase II     | EC:2.4.1.-  |            |            | COG0859                                       | M                   |
| Bfl609                 | rfaC              | 676893       | 677873     | lipopolysaccharide heptosyltransferase I                   | EC:2.4.1.-  |            |            | COG0859                                       | M                   |
| Bfl610                 | kdtA              | 678180       | 679472     | 3-deoxy-D-manno-octulosonic-acid transferase               | EC:2.4.99.- |            |            | COG1519                                       | M                   |
| Bfl611                 | rpmG              | 679688       | 679527     | 50S ribosomal subunit protein L33                          |             |            |            | COG0267                                       | J                   |
| Bfl612                 | rpmB              | 679936       | 679697     | 50S ribosomal subunit protein L28                          |             |            |            | COG0227                                       | J                   |
| Bfl613                 | dut               | 680447       | 680902     | deoxyuridine 5'-triphosphate nucleotidohydrolase           | EC:3.6.1.23 |            |            | COG0756                                       | F                   |
| Bfl614                 | yicC              | 681103       | 681975     | putative stress-induced protein                            |             |            |            | COG1561                                       | S                   |
| Bfl615                 | Bfl615            | 682523       | 682957     | putative transcription regulator protein                   |             |            |            | COG1846                                       | R                   |
| Bfl616                 | gmk               | 683158       | 683790     | guanylate kinase                                           | EC:2.7.4.8  |            |            | COG0194                                       | F                   |
| Bfl617                 | rpoZ              | 683827       | 684009     | DNA-directed RNA polymerase omega chain                    | EC:2.7.7.6  |            |            | COG1758                                       | K                   |
| Bfl618                 | glnA              | 684080       | 685501     | glutamine synthetase                                       | EC:6.3.1.2  |            |            | COG0174                                       | E                   |
| Bfl619                 | polA              | 688468       | 685637     | DNA polymerase I                                           | EC:2.7.7.7  |            |            | COG0749                                       | L                   |
| Bfl620                 | yigC              | 690798       | 689299     | putative oxidoreductase                                    | EC:4.1.1.-  |            |            | COG0043                                       | S                   |
| Bfl621                 | aarF              | 692543       | 690906     | ubiquinone biosynthesis protein                            |             |            |            | COG0661                                       | R                   |
| Bfl622                 | ubiE              | 693869       | 693105     | ubiquinone/menaquinone biosynthesis methyltransferase UbiE | EC:2.1.1.-  |            |            | COG2226                                       | H                   |
| Bfl623                 | rumC              | 695451       | 693976     | putative membrane protein                                  |             |            |            | COG1322                                       | S                   |
| Bfl624                 | udp               | 696377       | 695562     | uridine phosphorylase                                      | EC:2.4.2.3  |            |            | COG2820                                       | F                   |
| Bfl625                 | metE              | 698735       | 696426     | 5-methyltetrahydropteroyltryglutamate-homocysteine S-      | EC:2.1.1.14 |            |            | COG0620                                       | E                   |

| <b>Bfl gene number</b> | <b>Gene name*</b> | <b>Start</b> | <b>End</b> | <b>Product</b>                   | <b>EC1</b>  | <b>EC2</b> | <b>EC3</b> | <b>Cluster of orthologous genes (COG) no.</b> | <b>COG category</b> |
|------------------------|-------------------|--------------|------------|----------------------------------|-------------|------------|------------|-----------------------------------------------|---------------------|
|                        |                   |              |            | methyltransferase                |             |            |            |                                               |                     |
| Bfl626                 | rpoH              | 699829       | 698978     | RNA polymerase sigma-32 factor   |             |            |            | COG0568                                       | K                   |
| Bfl627                 | ftsY              | 701089       | 700163     | cell division protein FtsY       |             |            |            | COG0552                                       | N                   |
| Bfl628                 | yhhF              | 701183       | 701773     | putative methyltransferase       | EC:2.1.1.-  |            |            | COG0742                                       | L                   |
| Bfl629                 | pgi               | 703581       | 701905     | glucose-6-phosphate isomerase    | EC:5.3.1.9  |            |            | COG0166                                       | G                   |
| Bfl630                 | metA              | 704748       | 703858     | homoserine O-succinyltransferase | EC:2.3.1.46 |            |            | COG1897                                       | E                   |
| Bfl631                 | tRNA-Ile          | 705085       | 705012     | tRNA-Ile anticodon GAT           |             |            |            |                                               |                     |

\*Pseudogenes are in shadowed boxes.
