# Supplementary material
Source: PubMed Central journal article supplement (PMC170928)
Supplement: pnas_1533499100_4.pdf [file pnas_1533499100_4.pdf]

# Blochmannia genome

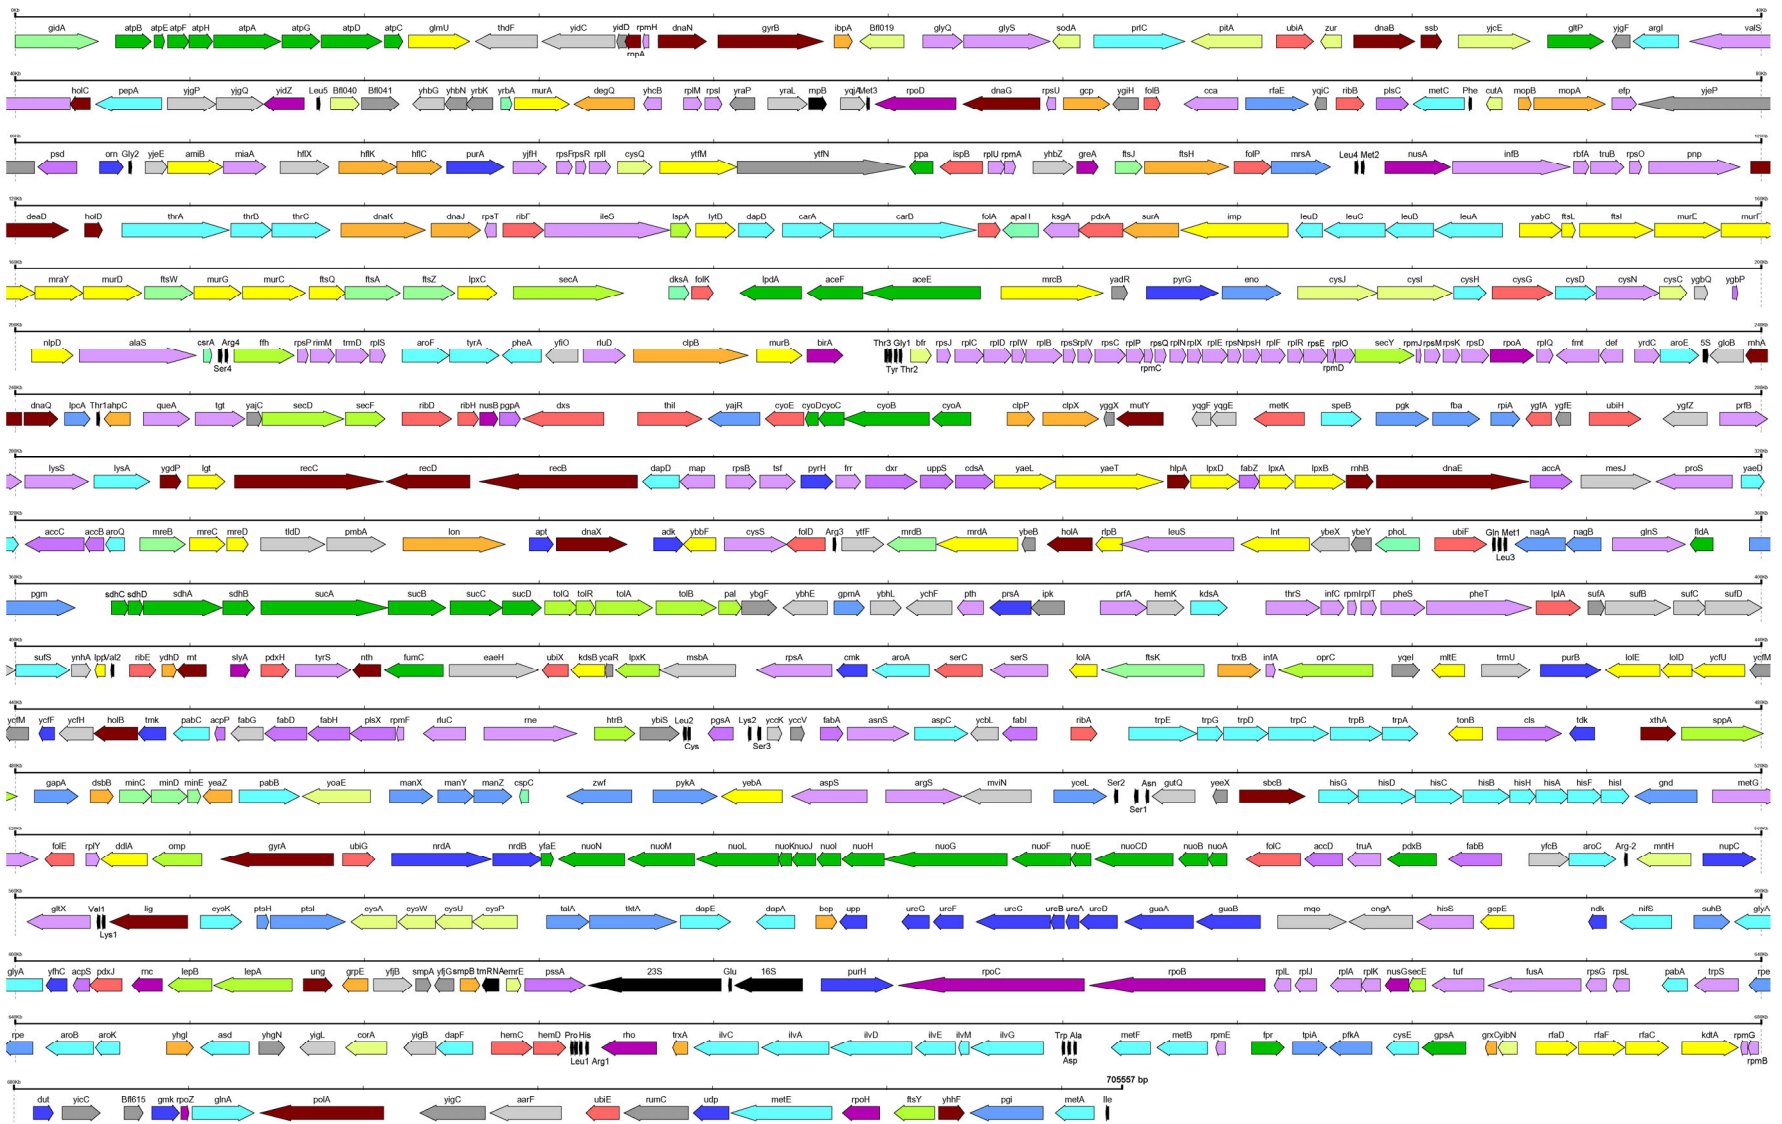

- |                                                                                                                                |                                                                                                                                       |                                                                                                                                                      |
|--------------------------------------------------------------------------------------------------------------------------------|---------------------------------------------------------------------------------------------------------------------------------------|------------------------------------------------------------------------------------------------------------------------------------------------------|
|  RNAs                                        |  Coenzyme metabolism H                             |  Posttranslational modification, protein turnover, chaperones O |
|  Pseudogenes                                 |  Lipid metabolism I                                |  Inorganic ion transport and metabolism P                       |
|  Energy production and conversion C          |  Translation, ribosomal structure and biogenesis J |  Signal transduction mechanisms T                               |
|  Cell division and chromosome partitioning D |  Transcription K                                   |  Cell motility and secretion N                                  |
|  Amino acid transport and metabolism E       |  DNA replication, recombination and repair L       |  General function prediction only R                             |
|  Nucleotide transport and metabolism F       |  Cell envelope biogenesis, outer membrane M        |  Function unknown S                                             |
|  Carbohydrate transport and metabolism G     |                                                                                                                                       |                                                                                                                                                      |
