# Supplementary material
Source: PubMed Central journal article supplement (PMC170928)

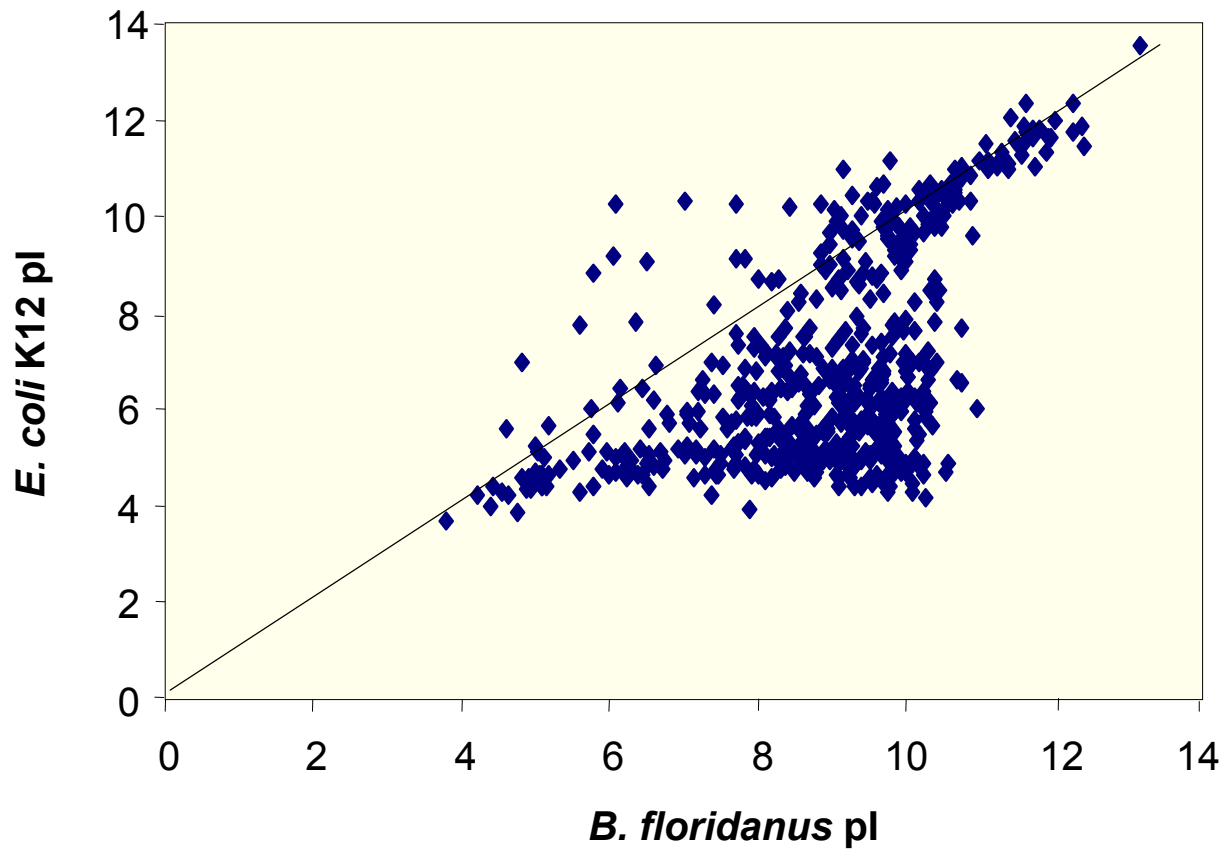

Supplement: pnas_1533499100_6.pdf [file pnas_1533499100_6.pdf]

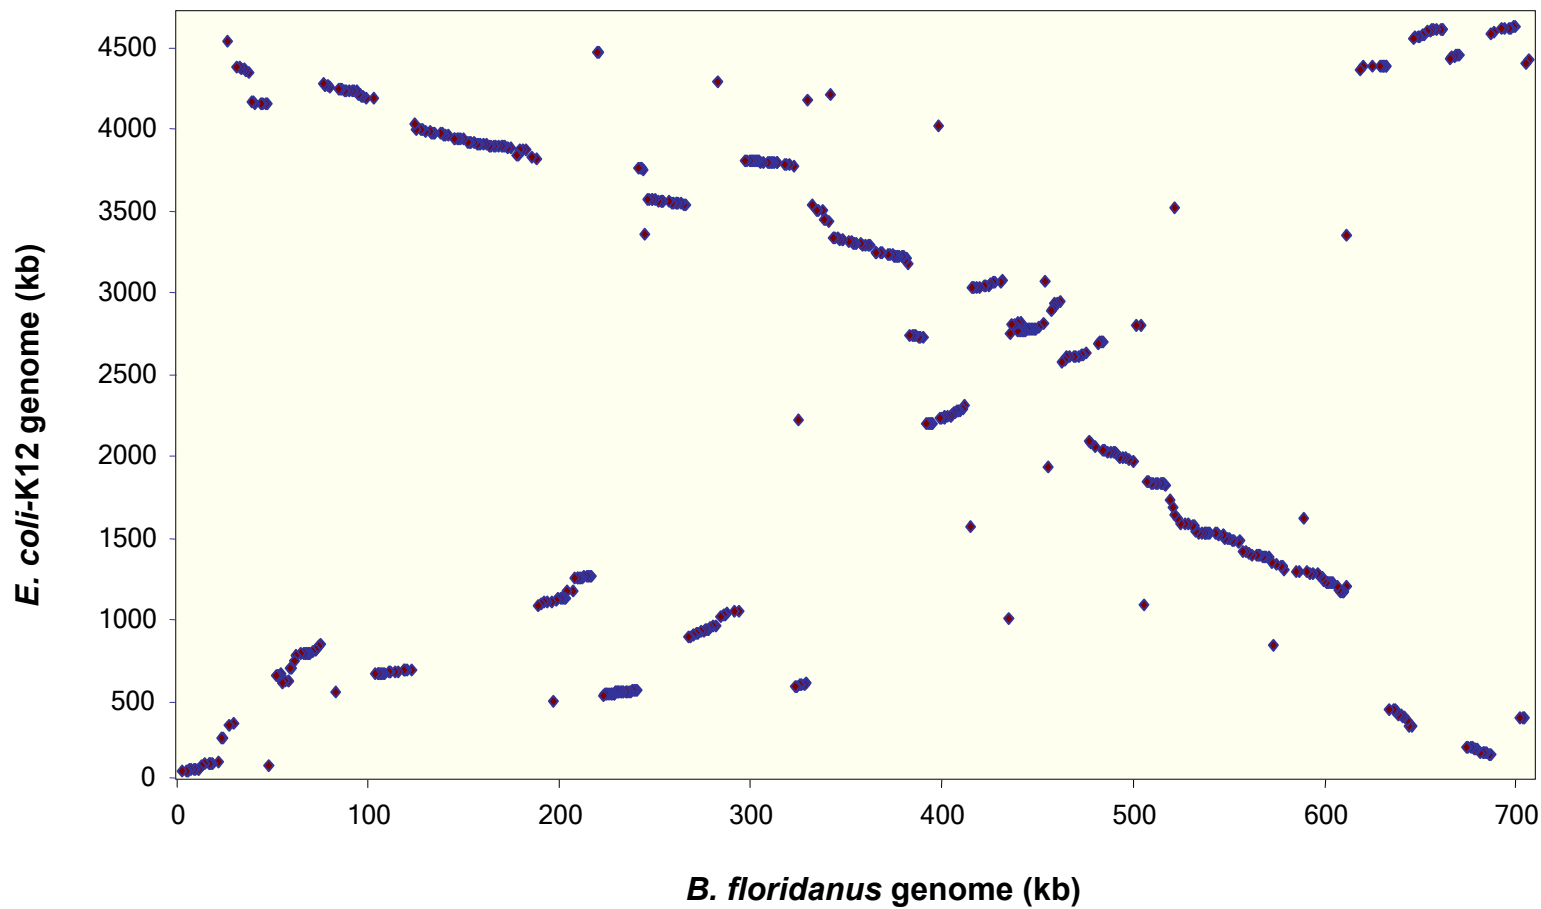

Supplement: pnas_1533499100_8.pdf [file pnas_1533499100_8.pdf]
